# Supplementary material for: Nomograms predict survival outcome of Klatskin tumors patients
Source: PeerJ. 2020 Feb 18;8:e8570. doi: 10.7717/peerj.8570 (PMC7034372; doi:10.7717/peerj.8570)
Supplement: File S1 — Each variable represents the details of the diagnosis of liver and and Intrahepatic bile duct cancer , such as insurance, diagnostic age, race, gender, stage, grade, tumor size, lymph node status, and survival time. [file peerj-08-8570-s001.xlsx]

## Sheet: Sheet1
Insurance Recode (2007+)	Marital status at diagnosis	Age at diagnosis	Year of birth	Year of diagnosis	Month of diagnosis	Sex	Race recode (White, Black, Other)	Primary Site - labeled	ICD-O-3 Hist/behav	Grade	AYA site recode/WHO 2008	ICCC site recode ICD-O-3/WHO 2008	Diagnostic Confirmation	Derived AJCC Stage Group, 6th ed (2004-2015)	Derived AJCC T, 6th ed (2004-2015)	Derived AJCC N, 6th ed (2004-2015)	Derived AJCC M, 6th ed (2004-2015)	AJCC stage 3rd edition (1988-2003)	SEER modified AJCC stage 3rd (1988-2003)	T value - based on AJCC 3rd (1988-2003)	N value - based on AJCC 3rd (1988-2003)	M value - based on AJCC 3rd (1988-2003)	Summary stage 2000 (1998+)	RX Summ--Surg Prim Site (1998+)	RX Summ--Scope Reg LN Sur (2003+)	RX Summ--Surg Oth Reg/Dis (2003+)	CS site-specific factor 1 (2004+ varying by schema)	CS site-specific factor 2 (2004+ varying by schema)	CS site-specific factor 3 (2004+ varying by schema)	CS site-specific factor 4 (2004+ varying by schema)	CS site-specific factor 5 (2004+ varying by schema)	CS site-specific factor 6 (2004+ varying by schema)	CS site-specific factor 7 (2004+ varying by schema)	CS site-specific factor 8 (2004+ varying by schema)	CS site-specific factor 9 (2004+ varying by schema)	CS site-specific factor 10 (2004+ varying by schema)	CS site-specific factor 11 (2004+ varying by schema)	CS site-specific factor 12 (2004+ varying by schema)	CS site-specific factor 13 (2004+ varying by schema)	CS site-specific factor 15 (2004+ varying by schema)	CS site-specific factor 16 (2004+ varying by schema)	CS site-specific factor 25 (2004+ varying by schema)	Regional nodes examined (1988+)	Regional nodes positive (1988+)	Lymph-vascular Invasion (2004+ varying by schema)	COD to site recode	SEER cause-specific death classification	SEER other cause of death classification	Survival months
Insured	Divorced	77	1930	2007	Blank(s)	Female	White	C22.0-Liver	8170/3: Hepatocellular carcinoma, NOS	Unknown	8.6.3 Carcinoma of liver and intrahepatic bile ducts	VII(b) Hepatic carcinomas	Positive histology	UNK Stage	TX	NX	MX	Blank(s)	Blank(s)	Blank(s)	Blank(s)	Blank(s)	Unknown/unstaged	0	None	None; diagnosed at autopsy	999	999	Blank(s)	Blank(s)	Blank(s)	Blank(s)	Blank(s)	Blank(s)	Blank(s)	Blank(s)	Blank(s)	Blank(s)	Blank(s)	Blank(s)	Blank(s)	988	0	98	Blank(s)	Liver	N/A not first tumor	N/A not first tumor	24
Blank(s)	Married (including common law)	42	1963	2006	April	Female	White	C22.1-Intrahepatic bile duct	8160/3: Cholangiocarcinoma	Unknown	8.6.3 Carcinoma of liver and intrahepatic bile ducts	VII(b) Hepatic carcinomas	Positive histology	IV	T1	N0	M1	Blank(s)	Blank(s)	Blank(s)	Blank(s)	Blank(s)	Distant	0	1 to 3 regional lymph nodes removed	None; diagnosed at autopsy	998	999	Blank(s)	Blank(s)	Blank(s)	Blank(s)	Blank(s)	Blank(s)	Blank(s)	Blank(s)	Blank(s)	Blank(s)	Blank(s)	Blank(s)	Blank(s)	988	3	2	Blank(s)	Breast	N/A not first tumor	N/A not first tumor	41
Blank(s)	Married (including common law)	77	1928	2006	May	Male	White	C22.0-Liver	8170/3: Hepatocellular carcinoma, NOS	Well differentiated; Grade I	8.6.3 Carcinoma of liver and intrahepatic bile ducts	VII(b) Hepatic carcinomas	Positive histology	UNK Stage	T1	NX	MX	Blank(s)	Blank(s)	Blank(s)	Blank(s)	Blank(s)	Localized	0	Unknown or not applicable	None; diagnosed at autopsy	999	999	Blank(s)	Blank(s)	Blank(s)	Blank(s)	Blank(s)	Blank(s)	Blank(s)	Blank(s)	Blank(s)	Blank(s)	Blank(s)	Blank(s)	Blank(s)	988	99	99	Blank(s)	Aortic Aneurysm and Dissection	N/A not first tumor	N/A not first tumor	1
Blank(s)	Married (including common law)	70	1935	2005	November	Male	White	C22.0-Liver	8170/3: Hepatocellular carcinoma, NOS	Moderately differentiated; Grade II	8.6.3 Carcinoma of liver and intrahepatic bile ducts	VII(b) Hepatic carcinomas	Positive histology	IV	T1	N0	M1	Blank(s)	Blank(s)	Blank(s)	Blank(s)	Blank(s)	Distant	21	None	None; diagnosed at autopsy	10	0	Blank(s)	Blank(s)	Blank(s)	Blank(s)	Blank(s)	Blank(s)	Blank(s)	Blank(s)	Blank(s)	Blank(s)	Blank(s)	Blank(s)	Blank(s)	988	0	98	Blank(s)	Liver	N/A not first tumor	N/A not first tumor	14
Insured/No specifics	Widowed	80	1930	2010	December	Female	White	C22.1-Intrahepatic bile duct	8160/3: Cholangiocarcinoma	Unknown	8.6.3 Carcinoma of liver and intrahepatic bile ducts	VII(b) Hepatic carcinomas	Positive histology	IIIA	T3	N0	M0	Blank(s)	Blank(s)	Blank(s)	Blank(s)	Blank(s)	Regional	0	None	None; diagnosed at autopsy	999	999	Blank(s)	Blank(s)	Blank(s)	Blank(s)	Blank(s)	Blank(s)	Blank(s)	Blank(s)	Blank(s)	Blank(s)	Blank(s)	Blank(s)	Blank(s)	988	0	98	Blank(s)	Intrahepatic Bile Duct	N/A not first tumor	N/A not first tumor	4
Insured	Married (including common law)	83	1930	2013	December	Female	White	C22.0-Liver	8170/3: Hepatocellular carcinoma, NOS	Unknown	8.6.3 Carcinoma of liver and intrahepatic bile ducts	VII(b) Hepatic carcinomas	Radiography without microscopic confirm	II	T2	N0	M0	Blank(s)	Blank(s)	Blank(s)	Blank(s)	Blank(s)	Localized	0	None	None; diagnosed at autopsy	10	999	Blank(s)	Blank(s)	Blank(s)	Blank(s)	Blank(s)	Blank(s)	Blank(s)	Blank(s)	Blank(s)	Blank(s)	Blank(s)	Blank(s)	Blank(s)	988	0	98	Blank(s)	Other Biliary	N/A not first tumor	N/A not first tumor	9
Insured	Separated	67	1946	2013	October	Male	White	C22.0-Liver	8170/3: Hepatocellular carcinoma, NOS	Unknown	8.6.3 Carcinoma of liver and intrahepatic bile ducts	VII(b) Hepatic carcinomas	Radiography without microscopic confirm	I	T1	N0	M0	Blank(s)	Blank(s)	Blank(s)	Blank(s)	Blank(s)	Localized	16	None	None; diagnosed at autopsy	999	1	Blank(s)	Blank(s)	Blank(s)	Blank(s)	Blank(s)	Blank(s)	Blank(s)	Blank(s)	Blank(s)	Blank(s)	Blank(s)	Blank(s)	Blank(s)	988	0	98	Blank(s)	Alive	N/A not first tumor	N/A not first tumor	38
Insured	Divorced	60	1947	2008	February	Male	White	C22.0-Liver	8170/3: Hepatocellular carcinoma, NOS	Moderately differentiated; Grade II	8.6.3 Carcinoma of liver and intrahepatic bile ducts	VII(b) Hepatic carcinomas	Positive histology	II	T2	N0	M0	Blank(s)	Blank(s)	Blank(s)	Blank(s)	Blank(s)	Localized	60	None	None; diagnosed at autopsy	10	0	Blank(s)	Blank(s)	Blank(s)	Blank(s)	Blank(s)	Blank(s)	Blank(s)	Blank(s)	Blank(s)	Blank(s)	Blank(s)	Blank(s)	Blank(s)	988	0	98	Blank(s)	Miscellaneous Malignant Cancer	N/A not first tumor	N/A not first tumor	48
Blank(s)	Single (never married)	43	1961	2004	Blank(s)	Male	White	C22.0-Liver	8170/3: Hepatocellular carcinoma, NOS	Unknown	8.6.3 Carcinoma of liver and intrahepatic bile ducts	VII(b) Hepatic carcinomas	Unknown	UNK Stage	TX	NX	M0	Blank(s)	Blank(s)	Blank(s)	Blank(s)	Blank(s)	Unknown/unstaged	0	None	None; diagnosed at autopsy	999	999	Blank(s)	Blank(s)	Blank(s)	Blank(s)	Blank(s)	Blank(s)	Blank(s)	Blank(s)	Blank(s)	Blank(s)	Blank(s)	Blank(s)	Blank(s)	988	0	98	Blank(s)	Liver	N/A not first tumor	N/A not first tumor	11
Insured	Married (including common law)	82	1925	2008	April	Female	White	C22.0-Liver	8170/3: Hepatocellular carcinoma, NOS	Unknown	8.6.3 Carcinoma of liver and intrahepatic bile ducts	VII(b) Hepatic carcinomas	Clinical diagnosis only	UNK Stage	TX	NX	MX	Blank(s)	Blank(s)	Blank(s)	Blank(s)	Blank(s)	Unknown/unstaged	0	None	None; diagnosed at autopsy	10	999	Blank(s)	Blank(s)	Blank(s)	Blank(s)	Blank(s)	Blank(s)	Blank(s)	Blank(s)	Blank(s)	Blank(s)	Blank(s)	Blank(s)	Blank(s)	988	0	98	Blank(s)	Other Infectious and Parasitic Diseases including HIV	N/A not first tumor	N/A not first tumor	1
Uninsured	Married (including common law)	66	1942	2009	February	Female	White	C22.0-Liver	8170/3: Hepatocellular carcinoma, NOS	Unknown	8.6.3 Carcinoma of liver and intrahepatic bile ducts	VII(b) Hepatic carcinomas	Positive histology	IIIA	T3	N0	M0	Blank(s)	Blank(s)	Blank(s)	Blank(s)	Blank(s)	Regional	0	None	None; diagnosed at autopsy	10	999	Blank(s)	Blank(s)	Blank(s)	Blank(s)	Blank(s)	Blank(s)	Blank(s)	Blank(s)	Blank(s)	Blank(s)	Blank(s)	Blank(s)	Blank(s)	988	0	98	Blank(s)	Liver	N/A not first tumor	N/A not first tumor	0
Insured	Divorced	66	1947	2013	October	Female	Black	C22.0-Liver	8170/3: Hepatocellular carcinoma, NOS	Moderately differentiated; Grade II	8.6.3 Carcinoma of liver and intrahepatic bile ducts	VII(b) Hepatic carcinomas	Positive histology	I	T1	N0	M0	Blank(s)	Blank(s)	Blank(s)	Blank(s)	Blank(s)	Localized	23	None	None; diagnosed at autopsy	10	999	Blank(s)	Blank(s)	Blank(s)	Blank(s)	Blank(s)	Blank(s)	Blank(s)	Blank(s)	Blank(s)	Blank(s)	Blank(s)	Blank(s)	Blank(s)	988	0	98	Blank(s)	Alive	N/A not first tumor	N/A not first tumor	38
Insurance status unknown	Widowed	89	1923	2012	August	Female	White	C22.0-Liver	8000/3: Neoplasm, malignant	Unknown	10 Unspecified Malignant Neoplasms	VII(c) Unspecified malignant hepatic tumors	Unknown	UNK Stage	TX	NX	MX	Blank(s)	Blank(s)	Blank(s)	Blank(s)	Blank(s)	Unknown/unstaged	99	Unknown or not applicable	Unknown; death certificate only	999	999	Blank(s)	Blank(s)	Blank(s)	Blank(s)	Blank(s)	Blank(s)	Blank(s)	Blank(s)	Blank(s)	Blank(s)	Blank(s)	Blank(s)	Blank(s)	988	99	99	Blank(s)	Liver	N/A not first tumor	N/A not first tumor	Unknown
Blank(s)	Widowed	73	1930	2004	March	Female	Black	C22.0-Liver	8170/3: Hepatocellular carcinoma, NOS	Well differentiated; Grade I	8.6.3 Carcinoma of liver and intrahepatic bile ducts	VII(b) Hepatic carcinomas	Positive histology	I	T1	N0	M0	Blank(s)	Blank(s)	Blank(s)	Blank(s)	Blank(s)	Localized	36	1 to 3 regional lymph nodes removed	None; diagnosed at autopsy	999	999	Blank(s)	Blank(s)	Blank(s)	Blank(s)	Blank(s)	Blank(s)	Blank(s)	Blank(s)	Blank(s)	Blank(s)	Blank(s)	Blank(s)	Blank(s)	988	2	0	Blank(s)	Diseases of Heart	N/A not first tumor	N/A not first tumor	50
Insured/No specifics	Married (including common law)	74	1936	2011	January	Male	White	C22.0-Liver	8170/3: Hepatocellular carcinoma, NOS	Unknown	8.6.3 Carcinoma of liver and intrahepatic bile ducts	VII(b) Hepatic carcinomas	Positive histology	IV	T3	N0	M1	Blank(s)	Blank(s)	Blank(s)	Blank(s)	Blank(s)	Distant	0	None	None; diagnosed at autopsy	10	999	Blank(s)	Blank(s)	Blank(s)	Blank(s)	Blank(s)	Blank(s)	Blank(s)	Blank(s)	Blank(s)	Blank(s)	Blank(s)	Blank(s)	Blank(s)	988	0	98	Blank(s)	Liver	N/A not first tumor	N/A not first tumor	5
Blank(s)	Separated	69	1935	2005	May	Female	White	C22.0-Liver	8170/3: Hepatocellular carcinoma, NOS	Unknown	8.6.3 Carcinoma of liver and intrahepatic bile ducts	VII(b) Hepatic carcinomas	Radiography without microscopic confirm	IV	T1	NX	M1	Blank(s)	Blank(s)	Blank(s)	Blank(s)	Blank(s)	Distant	0	None	None; diagnosed at autopsy	20	999	Blank(s)	Blank(s)	Blank(s)	Blank(s)	Blank(s)	Blank(s)	Blank(s)	Blank(s)	Blank(s)	Blank(s)	Blank(s)	Blank(s)	Blank(s)	988	0	98	Blank(s)	Other Infectious and Parasitic Diseases including HIV	N/A not first tumor	N/A not first tumor	5
Blank(s)	Single (never married)	50	1954	2005	January	Female	Black	C22.0-Liver	8170/3: Hepatocellular carcinoma, NOS	Unknown	8.6.3 Carcinoma of liver and intrahepatic bile ducts	VII(b) Hepatic carcinomas	Clinical diagnosis only	I	T1	N0	M0	Blank(s)	Blank(s)	Blank(s)	Blank(s)	Blank(s)	Localized	0	None	None; diagnosed at autopsy	999	999	Blank(s)	Blank(s)	Blank(s)	Blank(s)	Blank(s)	Blank(s)	Blank(s)	Blank(s)	Blank(s)	Blank(s)	Blank(s)	Blank(s)	Blank(s)	988	0	98	Blank(s)	Liver	N/A not first tumor	N/A not first tumor	0
Insurance status unknown	Single (never married)	91	1919	2011	January	Female	White	C22.1-Intrahepatic bile duct	8000/3: Neoplasm, malignant	Unknown	10 Unspecified Malignant Neoplasms	VII(c) Unspecified malignant hepatic tumors	Unknown	UNK Stage	TX	NX	MX	Blank(s)	Blank(s)	Blank(s)	Blank(s)	Blank(s)	Unknown/unstaged	99	Unknown or not applicable	Unknown; death certificate only	999	999	Blank(s)	Blank(s)	Blank(s)	Blank(s)	Blank(s)	Blank(s)	Blank(s)	Blank(s)	Blank(s)	Blank(s)	Blank(s)	Blank(s)	Blank(s)	988	99	99	Blank(s)	Intrahepatic Bile Duct	N/A not first tumor	N/A not first tumor	Unknown
Insured	Divorced	73	1938	2012	January	Female	White	C22.0-Liver	8170/3: Hepatocellular carcinoma, NOS	Unknown	8.6.3 Carcinoma of liver and intrahepatic bile ducts	VII(b) Hepatic carcinomas	Clinical diagnosis only	IIIC	T3	N1	M0	Blank(s)	Blank(s)	Blank(s)	Blank(s)	Blank(s)	Regional	0	None	None; diagnosed at autopsy	10	1	Blank(s)	Blank(s)	Blank(s)	Blank(s)	Blank(s)	Blank(s)	Blank(s)	Blank(s)	Blank(s)	Blank(s)	Blank(s)	Blank(s)	Blank(s)	988	0	98	Blank(s)	Liver	N/A not first tumor	N/A not first tumor	1
Insured/No specifics	Single (never married)	83	1924	2007	November	Male	Black	C22.0-Liver	8170/3: Hepatocellular carcinoma, NOS	Unknown	8.6.3 Carcinoma of liver and intrahepatic bile ducts	VII(b) Hepatic carcinomas	Positive histology	I	T1	N0	M0	Blank(s)	Blank(s)	Blank(s)	Blank(s)	Blank(s)	Localized	0	None	None; diagnosed at autopsy	10	999	Blank(s)	Blank(s)	Blank(s)	Blank(s)	Blank(s)	Blank(s)	Blank(s)	Blank(s)	Blank(s)	Blank(s)	Blank(s)	Blank(s)	Blank(s)	988	0	98	Blank(s)	Diseases of Heart	N/A not first tumor	N/A not first tumor	3
Blank(s)	Divorced	83	1922	2005	June	Female	White	C22.0-Liver	8170/3: Hepatocellular carcinoma, NOS	Unknown	8.6.3 Carcinoma of liver and intrahepatic bile ducts	VII(b) Hepatic carcinomas	Radiography without microscopic confirm	II	T2	N0	M0	Blank(s)	Blank(s)	Blank(s)	Blank(s)	Blank(s)	Localized	0	None	None; diagnosed at autopsy	999	1	Blank(s)	Blank(s)	Blank(s)	Blank(s)	Blank(s)	Blank(s)	Blank(s)	Blank(s)	Blank(s)	Blank(s)	Blank(s)	Blank(s)	Blank(s)	988	0	98	Blank(s)	Chronic Liver Disease and Cirrhosis	N/A not first tumor	N/A not first tumor	41
Insured	Married (including common law)	89	1921	2011	March	Female	Other (American Indian/AK Native, Asian/Pacific Islander)	C22.0-Liver	8170/3: Hepatocellular carcinoma, NOS	Well differentiated; Grade I	8.6.3 Carcinoma of liver and intrahepatic bile ducts	VII(b) Hepatic carcinomas	Positive histology	IIIA	T3	N0	M0	Blank(s)	Blank(s)	Blank(s)	Blank(s)	Blank(s)	Localized	0	None	None; diagnosed at autopsy	10	0	Blank(s)	Blank(s)	Blank(s)	Blank(s)	Blank(s)	Blank(s)	Blank(s)	Blank(s)	Blank(s)	Blank(s)	Blank(s)	Blank(s)	Blank(s)	988	0	98	Blank(s)	Liver	N/A not first tumor	N/A not first tumor	2
Insured	Widowed	81	1931	2012	September	Female	White	C22.0-Liver	8170/3: Hepatocellular carcinoma, NOS	Poorly differentiated; Grade III	8.6.3 Carcinoma of liver and intrahepatic bile ducts	VII(b) Hepatic carcinomas	Positive histology	UNK Stage	TX	N0	MX	Blank(s)	Blank(s)	Blank(s)	Blank(s)	Blank(s)	Unknown/unstaged	0	None	None; diagnosed at autopsy	20	999	Blank(s)	Blank(s)	Blank(s)	Blank(s)	Blank(s)	Blank(s)	Blank(s)	Blank(s)	Blank(s)	Blank(s)	Blank(s)	Blank(s)	Blank(s)	988	0	98	Blank(s)	Liver	N/A not first tumor	N/A not first tumor	0
Any Medicaid	Widowed	84	1922	2007	June	Female	Other (American Indian/AK Native, Asian/Pacific Islander)	C22.0-Liver	8170/3: Hepatocellular carcinoma, NOS	Unknown	8.6.3 Carcinoma of liver and intrahepatic bile ducts	VII(b) Hepatic carcinomas	Radiography without microscopic confirm	UNK Stage	TX	N0	M0	Blank(s)	Blank(s)	Blank(s)	Blank(s)	Blank(s)	Regional	0	None	None; diagnosed at autopsy	999	999	Blank(s)	Blank(s)	Blank(s)	Blank(s)	Blank(s)	Blank(s)	Blank(s)	Blank(s)	Blank(s)	Blank(s)	Blank(s)	Blank(s)	Blank(s)	988	0	98	Blank(s)	Liver	N/A not first tumor	N/A not first tumor	15
Insured/No specifics	Widowed	71	1941	2012	September	Female	White	C22.0-Liver	8170/3: Hepatocellular carcinoma, NOS	Unknown	8.6.3 Carcinoma of liver and intrahepatic bile ducts	VII(b) Hepatic carcinomas	Positive laboratory test/marker study	UNK Stage	TX	N0	M0	Blank(s)	Blank(s)	Blank(s)	Blank(s)	Blank(s)	Unknown/unstaged	0	None	None; diagnosed at autopsy	10	999	Blank(s)	Blank(s)	Blank(s)	Blank(s)	Blank(s)	Blank(s)	Blank(s)	Blank(s)	Blank(s)	Blank(s)	Blank(s)	Blank(s)	Blank(s)	988	0	98	Blank(s)	Liver	N/A not first tumor	N/A not first tumor	0
Insured/No specifics	Divorced	68	1945	2013	December	Female	Black	C22.0-Liver	8170/3: Hepatocellular carcinoma, NOS	Unknown	8.6.3 Carcinoma of liver and intrahepatic bile ducts	VII(b) Hepatic carcinomas	Positive laboratory test/marker study	IV	T3	N1	M1	Blank(s)	Blank(s)	Blank(s)	Blank(s)	Blank(s)	Distant	0	None	None; diagnosed at autopsy	10	1	Blank(s)	Blank(s)	Blank(s)	Blank(s)	Blank(s)	Blank(s)	Blank(s)	Blank(s)	Blank(s)	Blank(s)	Blank(s)	Blank(s)	Blank(s)	988	0	98	Blank(s)	Liver	N/A not first tumor	N/A not first tumor	1
Insured/No specifics	Widowed	89	1925	2014	December	Female	White	C22.0-Liver	8246/3: Neuroendocrine carcinoma, NOS	Poorly differentiated; Grade III	8.6.3 Carcinoma of liver and intrahepatic bile ducts	VII(b) Hepatic carcinomas	Positive histology	II	T2	N0	M0	Blank(s)	Blank(s)	Blank(s)	Blank(s)	Blank(s)	Regional	0	None	None; diagnosed at autopsy	998	999	Blank(s)	Blank(s)	Blank(s)	Blank(s)	Blank(s)	Blank(s)	Blank(s)	Blank(s)	Blank(s)	Blank(s)	Blank(s)	Blank(s)	Blank(s)	988	0	98	Blank(s)	Miscellaneous Malignant Cancer	N/A not first tumor	N/A not first tumor	1
Insured	Single (never married)	65	1949	2014	October	Male	Black	C22.0-Liver	8170/3: Hepatocellular carcinoma, NOS	Unknown	8.6.3 Carcinoma of liver and intrahepatic bile ducts	VII(b) Hepatic carcinomas	Radiography without microscopic confirm	IV	T3	N0	M1	Blank(s)	Blank(s)	Blank(s)	Blank(s)	Blank(s)	Distant	0	None	None; diagnosed at autopsy	10	999	Blank(s)	Blank(s)	Blank(s)	Blank(s)	Blank(s)	Blank(s)	Blank(s)	Blank(s)	Blank(s)	Blank(s)	Blank(s)	Blank(s)	Blank(s)	988	0	98	Blank(s)	Miscellaneous Malignant Cancer	N/A not first tumor	N/A not first tumor	2
Insured	Single (never married)	42	1970	2012	March	Male	Other (American Indian/AK Native, Asian/Pacific Islander)	C22.0-Liver	8170/3: Hepatocellular carcinoma, NOS	Unknown	8.6.3 Carcinoma of liver and intrahepatic bile ducts	VII(b) Hepatic carcinomas	Positive laboratory test/marker study	IIIA	T3	N0	M0	Blank(s)	Blank(s)	Blank(s)	Blank(s)	Blank(s)	Regional	0	None	None; diagnosed at autopsy	10	1	Blank(s)	Blank(s)	Blank(s)	Blank(s)	Blank(s)	Blank(s)	Blank(s)	Blank(s)	Blank(s)	Blank(s)	Blank(s)	Blank(s)	Blank(s)	988	0	98	Blank(s)	Stomach and Duodenal Ulcers	N/A not first tumor	N/A not first tumor	2
Insured	Widowed	91	1920	2011	October	Female	White	C22.0-Liver	8170/3: Hepatocellular carcinoma, NOS	Unknown	8.6.3 Carcinoma of liver and intrahepatic bile ducts	VII(b) Hepatic carcinomas	Positive laboratory test/marker study	I	T1	N0	M0	Blank(s)	Blank(s)	Blank(s)	Blank(s)	Blank(s)	Localized	0	None	None; diagnosed at autopsy	10	1	Blank(s)	Blank(s)	Blank(s)	Blank(s)	Blank(s)	Blank(s)	Blank(s)	Blank(s)	Blank(s)	Blank(s)	Blank(s)	Blank(s)	Blank(s)	988	0	98	Blank(s)	Liver	N/A not first tumor	N/A not first tumor	13
Insured	Single (never married)	59	1953	2013	April	Male	White	C22.0-Liver	8170/3: Hepatocellular carcinoma, NOS	Moderately differentiated; Grade II	8.6.3 Carcinoma of liver and intrahepatic bile ducts	VII(b) Hepatic carcinomas	Positive histology	IIIA	T3	N0	M0	Blank(s)	Blank(s)	Blank(s)	Blank(s)	Blank(s)	Localized	36	1 to 3 regional lymph nodes removed	None; diagnosed at autopsy	10	1	Blank(s)	Blank(s)	Blank(s)	Blank(s)	Blank(s)	Blank(s)	Blank(s)	Blank(s)	Blank(s)	Blank(s)	Blank(s)	Blank(s)	Blank(s)	988	3	0	Blank(s)	Liver	N/A not first tumor	N/A not first tumor	28
Blank(s)	Widowed	61	1943	2004	November	Female	White	C22.0-Liver	8170/3: Hepatocellular carcinoma, NOS	Unknown	8.6.3 Carcinoma of liver and intrahepatic bile ducts	VII(b) Hepatic carcinomas	Positive histology	I	T1	N0	M0	Blank(s)	Blank(s)	Blank(s)	Blank(s)	Blank(s)	Localized	61	None	None; diagnosed at autopsy	10	1	Blank(s)	Blank(s)	Blank(s)	Blank(s)	Blank(s)	Blank(s)	Blank(s)	Blank(s)	Blank(s)	Blank(s)	Blank(s)	Blank(s)	Blank(s)	988	0	98	Blank(s)	Diseases of Heart	N/A not first tumor	N/A not first tumor	144
Insured	Single (never married)	87	1920	2007	November	Male	White	C22.0-Liver	8170/3: Hepatocellular carcinoma, NOS	Unknown	8.6.3 Carcinoma of liver and intrahepatic bile ducts	VII(b) Hepatic carcinomas	Clinical diagnosis only	UNK Stage	T3	NX	MX	Blank(s)	Blank(s)	Blank(s)	Blank(s)	Blank(s)	Localized	0	None	None; diagnosed at autopsy	10	1	Blank(s)	Blank(s)	Blank(s)	Blank(s)	Blank(s)	Blank(s)	Blank(s)	Blank(s)	Blank(s)	Blank(s)	Blank(s)	Blank(s)	Blank(s)	988	0	98	Blank(s)	Liver	N/A not first tumor	N/A not first tumor	1
Blank(s)	Married (including common law)	80	1925	2006	May	Male	Other (American Indian/AK Native, Asian/Pacific Islander)	C22.1-Intrahepatic bile duct	8160/3: Cholangiocarcinoma	Well differentiated; Grade I	8.6.3 Carcinoma of liver and intrahepatic bile ducts	VII(b) Hepatic carcinomas	Positive histology	IV	T2	N0	M1	Blank(s)	Blank(s)	Blank(s)	Blank(s)	Blank(s)	Distant	0	None	None; diagnosed at autopsy	20	999	Blank(s)	Blank(s)	Blank(s)	Blank(s)	Blank(s)	Blank(s)	Blank(s)	Blank(s)	Blank(s)	Blank(s)	Blank(s)	Blank(s)	Blank(s)	988	0	98	Blank(s)	Intrahepatic Bile Duct	N/A not first tumor	N/A not first tumor	46
Blank(s)	Widowed	84	1921	2005	December	Female	White	C22.0-Liver	8170/3: Hepatocellular carcinoma, NOS	Well differentiated; Grade I	8.6.3 Carcinoma of liver and intrahepatic bile ducts	VII(b) Hepatic carcinomas	Positive exfoliative cytology, no positive histology	UNK Stage	TX	NX	MX	Blank(s)	Blank(s)	Blank(s)	Blank(s)	Blank(s)	Unknown/unstaged	0	None	None; diagnosed at autopsy	999	999	Blank(s)	Blank(s)	Blank(s)	Blank(s)	Blank(s)	Blank(s)	Blank(s)	Blank(s)	Blank(s)	Blank(s)	Blank(s)	Blank(s)	Blank(s)	988	0	98	Blank(s)	Liver	N/A not first tumor	N/A not first tumor	7
Insured/No specifics	Married (including common law)	79	1934	2014	January	Male	Other (American Indian/AK Native, Asian/Pacific Islander)	C22.0-Liver	8170/3: Hepatocellular carcinoma, NOS	Moderately differentiated; Grade II	8.6.3 Carcinoma of liver and intrahepatic bile ducts	VII(b) Hepatic carcinomas	Positive histology	II	T2	N0	M0	Blank(s)	Blank(s)	Blank(s)	Blank(s)	Blank(s)	Localized	0	None	None; diagnosed at autopsy	10	1	Blank(s)	Blank(s)	Blank(s)	Blank(s)	Blank(s)	Blank(s)	Blank(s)	Blank(s)	Blank(s)	Blank(s)	Blank(s)	Blank(s)	Blank(s)	988	0	98	Blank(s)	Liver	N/A not first tumor	N/A not first tumor	15
Insured	Widowed	74	1937	2011	October	Female	White	C22.1-Intrahepatic bile duct	8160/3: Cholangiocarcinoma	Unknown	8.6.3 Carcinoma of liver and intrahepatic bile ducts	VII(b) Hepatic carcinomas	Positive histology	IV	T4	NX	M1	Blank(s)	Blank(s)	Blank(s)	Blank(s)	Blank(s)	Regional	66	Unknown or not applicable	Non-primary surgical procedure to other regional sites	999	999	Blank(s)	Blank(s)	Blank(s)	Blank(s)	Blank(s)	Blank(s)	Blank(s)	Blank(s)	Blank(s)	Blank(s)	Blank(s)	Blank(s)	Blank(s)	988	0	98	Blank(s)	Other Biliary	N/A not first tumor	N/A not first tumor	11
Insured/No specifics	Married (including common law)	65	1945	2010	Blank(s)	Male	White	C22.0-Liver	8170/3: Hepatocellular carcinoma, NOS	Unknown	8.6.3 Carcinoma of liver and intrahepatic bile ducts	VII(b) Hepatic carcinomas	Unknown	UNK Stage	TX	N0	M0	Blank(s)	Blank(s)	Blank(s)	Blank(s)	Blank(s)	Unknown/unstaged	0	None	None; diagnosed at autopsy	999	999	Blank(s)	Blank(s)	Blank(s)	Blank(s)	Blank(s)	Blank(s)	Blank(s)	Blank(s)	Blank(s)	Blank(s)	Blank(s)	Blank(s)	Blank(s)	988	0	98	Blank(s)	Liver	N/A not first tumor	N/A not first tumor	67
Blank(s)	Married (including common law)	74	1930	2004	April	Male	Other (American Indian/AK Native, Asian/Pacific Islander)	C22.0-Liver	8170/3: Hepatocellular carcinoma, NOS	Poorly differentiated; Grade III	8.6.3 Carcinoma of liver and intrahepatic bile ducts	VII(b) Hepatic carcinomas	Positive histology	IIIA	T3	N0	M0	Blank(s)	Blank(s)	Blank(s)	Blank(s)	Blank(s)	Localized	0	None	None; diagnosed at autopsy	10	999	Blank(s)	Blank(s)	Blank(s)	Blank(s)	Blank(s)	Blank(s)	Blank(s)	Blank(s)	Blank(s)	Blank(s)	Blank(s)	Blank(s)	Blank(s)	988	0	98	Blank(s)	Liver	N/A not first tumor	N/A not first tumor	40
Insured	Married (including common law)	75	1937	2012	July	Female	Other (American Indian/AK Native, Asian/Pacific Islander)	C22.0-Liver	8170/3: Hepatocellular carcinoma, NOS	Unknown	8.6.3 Carcinoma of liver and intrahepatic bile ducts	VII(b) Hepatic carcinomas	Radiography without microscopic confirm	I	T1	N0	M0	Blank(s)	Blank(s)	Blank(s)	Blank(s)	Blank(s)	Localized	16	None	None; diagnosed at autopsy	998	1	Blank(s)	Blank(s)	Blank(s)	Blank(s)	Blank(s)	Blank(s)	Blank(s)	Blank(s)	Blank(s)	Blank(s)	Blank(s)	Blank(s)	Blank(s)	988	0	98	Blank(s)	Liver	N/A not first tumor	N/A not first tumor	37
Insurance status unknown	Married (including common law)	95	1914	2010	August	Male	White	C22.1-Intrahepatic bile duct	8160/3: Cholangiocarcinoma	Unknown	8.6.3 Carcinoma of liver and intrahepatic bile ducts	VII(b) Hepatic carcinomas	Unknown	UNK Stage	TX	NX	MX	Blank(s)	Blank(s)	Blank(s)	Blank(s)	Blank(s)	Unknown/unstaged	99	Unknown or not applicable	Unknown; death certificate only	999	999	Blank(s)	Blank(s)	Blank(s)	Blank(s)	Blank(s)	Blank(s)	Blank(s)	Blank(s)	Blank(s)	Blank(s)	Blank(s)	Blank(s)	Blank(s)	988	99	99	Blank(s)	Intrahepatic Bile Duct	N/A not first tumor	N/A not first tumor	Unknown
Blank(s)	Single (never married)	79	1925	2005	May	Female	Black	C22.1-Intrahepatic bile duct	8160/3: Cholangiocarcinoma	Unknown	8.6.3 Carcinoma of liver and intrahepatic bile ducts	VII(b) Hepatic carcinomas	Positive histology	IIIB	T4	N0	M0	Blank(s)	Blank(s)	Blank(s)	Blank(s)	Blank(s)	Regional	0	None	None; diagnosed at autopsy	999	0	Blank(s)	Blank(s)	Blank(s)	Blank(s)	Blank(s)	Blank(s)	Blank(s)	Blank(s)	Blank(s)	Blank(s)	Blank(s)	Blank(s)	Blank(s)	988	0	98	Blank(s)	Intrahepatic Bile Duct	N/A not first tumor	N/A not first tumor	2
Insured	Widowed	80	1930	2011	February	Female	White	C22.1-Intrahepatic bile duct	8160/3: Cholangiocarcinoma	Unknown	8.6.3 Carcinoma of liver and intrahepatic bile ducts	VII(b) Hepatic carcinomas	Positive histology	UNK Stage	TX	N0	M0	Blank(s)	Blank(s)	Blank(s)	Blank(s)	Blank(s)	Regional	0	None	None; diagnosed at autopsy	999	999	Blank(s)	Blank(s)	Blank(s)	Blank(s)	Blank(s)	Blank(s)	Blank(s)	Blank(s)	Blank(s)	Blank(s)	Blank(s)	Blank(s)	Blank(s)	988	0	98	Blank(s)	Pancreas	N/A not first tumor	N/A not first tumor	0
Insured	Widowed	81	1932	2014	September	Male	Other (American Indian/AK Native, Asian/Pacific Islander)	C22.0-Liver	8170/3: Hepatocellular carcinoma, NOS	Poorly differentiated; Grade III	8.6.3 Carcinoma of liver and intrahepatic bile ducts	VII(b) Hepatic carcinomas	Positive histology	IV	T4	N0	M1	Blank(s)	Blank(s)	Blank(s)	Blank(s)	Blank(s)	Distant	0	None	None; diagnosed at autopsy	20	999	Blank(s)	Blank(s)	Blank(s)	Blank(s)	Blank(s)	Blank(s)	Blank(s)	Blank(s)	Blank(s)	Blank(s)	Blank(s)	Blank(s)	Blank(s)	988	0	98	Blank(s)	Liver	N/A not first tumor	N/A not first tumor	0
Blank(s)	Widowed	77	1927	2005	September	Female	Other (American Indian/AK Native, Asian/Pacific Islander)	C22.0-Liver	8170/3: Hepatocellular carcinoma, NOS	Moderately differentiated; Grade II	8.6.3 Carcinoma of liver and intrahepatic bile ducts	VII(b) Hepatic carcinomas	Positive histology	I	T1	N0	M0	Blank(s)	Blank(s)	Blank(s)	Blank(s)	Blank(s)	Localized	16	None	None; diagnosed at autopsy	20	999	Blank(s)	Blank(s)	Blank(s)	Blank(s)	Blank(s)	Blank(s)	Blank(s)	Blank(s)	Blank(s)	Blank(s)	Blank(s)	Blank(s)	Blank(s)	988	0	98	Blank(s)	Alive	N/A not first tumor	N/A not first tumor	135
Insured/No specifics	Single (never married)	69	1940	2009	May	Female	Black	C22.0-Liver	8170/3: Hepatocellular carcinoma, NOS	Unknown	8.6.3 Carcinoma of liver and intrahepatic bile ducts	VII(b) Hepatic carcinomas	Positive laboratory test/marker study	II	T2	N0	M0	Blank(s)	Blank(s)	Blank(s)	Blank(s)	Blank(s)	Regional	0	None	None; diagnosed at autopsy	10	1	Blank(s)	Blank(s)	Blank(s)	Blank(s)	Blank(s)	Blank(s)	Blank(s)	Blank(s)	Blank(s)	Blank(s)	Blank(s)	Blank(s)	Blank(s)	988	0	98	Blank(s)	Miscellaneous Malignant Cancer	N/A not first tumor	N/A not first tumor	1
Insured	Single (never married)	69	1944	2014	January	Female	White	C22.0-Liver	8160/3: Cholangiocarcinoma	Well differentiated; Grade I	8.6.3 Carcinoma of liver and intrahepatic bile ducts	VII(b) Hepatic carcinomas	Positive histology	IV	T4	N1	M1	Blank(s)	Blank(s)	Blank(s)	Blank(s)	Blank(s)	Distant	50	4 or more regional lymph nodes removed	None; diagnosed at autopsy	10	999	Blank(s)	Blank(s)	Blank(s)	Blank(s)	Blank(s)	Blank(s)	Blank(s)	Blank(s)	Blank(s)	Blank(s)	Blank(s)	Blank(s)	Blank(s)	988	5	1	Blank(s)	Other Diseases of Arteries, Arterioles, Capillaries	N/A not first tumor	N/A not first tumor	3
Insured	Married (including common law)	71	1942	2014	September	Male	White	C22.0-Liver	8160/3: Cholangiocarcinoma	Unknown	8.6.3 Carcinoma of liver and intrahepatic bile ducts	VII(b) Hepatic carcinomas	Positive histology	IV	T3	NX	M1	Blank(s)	Blank(s)	Blank(s)	Blank(s)	Blank(s)	Distant	0	None	None; diagnosed at autopsy	998	0	Blank(s)	Blank(s)	Blank(s)	Blank(s)	Blank(s)	Blank(s)	Blank(s)	Blank(s)	Blank(s)	Blank(s)	Blank(s)	Blank(s)	Blank(s)	988	0	98	Blank(s)	Other Biliary	N/A not first tumor	N/A not first tumor	7
Insured	Divorced	75	1932	2007	October	Male	White	C22.0-Liver	8170/3: Hepatocellular carcinoma, NOS	Unknown	8.6.3 Carcinoma of liver and intrahepatic bile ducts	VII(b) Hepatic carcinomas	Positive histology	UNK Stage	TX	N0	M0	Blank(s)	Blank(s)	Blank(s)	Blank(s)	Blank(s)	Localized	0	None	None; diagnosed at autopsy	999	999	Blank(s)	Blank(s)	Blank(s)	Blank(s)	Blank(s)	Blank(s)	Blank(s)	Blank(s)	Blank(s)	Blank(s)	Blank(s)	Blank(s)	Blank(s)	988	0	98	Blank(s)	Liver	N/A not first tumor	N/A not first tumor	0
Blank(s)	Single (never married)	55	1950	2006	January	Female	Black	C22.0-Liver	8170/3: Hepatocellular carcinoma, NOS	Well differentiated; Grade I	8.6.3 Carcinoma of liver and intrahepatic bile ducts	VII(b) Hepatic carcinomas	Positive histology	I	T1	N0	M0	Blank(s)	Blank(s)	Blank(s)	Blank(s)	Blank(s)	Localized	16	None	None; diagnosed at autopsy	10	1	Blank(s)	Blank(s)	Blank(s)	Blank(s)	Blank(s)	Blank(s)	Blank(s)	Blank(s)	Blank(s)	Blank(s)	Blank(s)	Blank(s)	Blank(s)	988	0	98	Blank(s)	Liver	N/A not first tumor	N/A not first tumor	5
Insured	Unknown	80	1931	2012	March	Female	Other (American Indian/AK Native, Asian/Pacific Islander)	C22.0-Liver	8000/3: Neoplasm, malignant	Unknown	10 Unspecified Malignant Neoplasms	VII(c) Unspecified malignant hepatic tumors	Radiography without microscopic confirm	UNK Stage	TX	N0	M0	Blank(s)	Blank(s)	Blank(s)	Blank(s)	Blank(s)	Localized	0	None	None; diagnosed at autopsy	20	999	Blank(s)	Blank(s)	Blank(s)	Blank(s)	Blank(s)	Blank(s)	Blank(s)	Blank(s)	Blank(s)	Blank(s)	Blank(s)	Blank(s)	Blank(s)	988	0	98	Blank(s)	Miscellaneous Malignant Cancer	N/A not first tumor	N/A not first tumor	2
Blank(s)	Married (including common law)	71	1935	2006	December	Female	Other (American Indian/AK Native, Asian/Pacific Islander)	C22.0-Liver	8170/3: Hepatocellular carcinoma, NOS	Unknown	8.6.3 Carcinoma of liver and intrahepatic bile ducts	VII(b) Hepatic carcinomas	Clinical diagnosis only	I	T1	N0	M0	Blank(s)	Blank(s)	Blank(s)	Blank(s)	Blank(s)	Localized	0	None	None; diagnosed at autopsy	10	1	Blank(s)	Blank(s)	Blank(s)	Blank(s)	Blank(s)	Blank(s)	Blank(s)	Blank(s)	Blank(s)	Blank(s)	Blank(s)	Blank(s)	Blank(s)	988	0	98	Blank(s)	Liver	N/A not first tumor	N/A not first tumor	52
Any Medicaid	Widowed	62	1951	2014	March	Female	Other (American Indian/AK Native, Asian/Pacific Islander)	C22.0-Liver	8170/3: Hepatocellular carcinoma, NOS	Moderately differentiated; Grade II	8.6.3 Carcinoma of liver and intrahepatic bile ducts	VII(b) Hepatic carcinomas	Positive histology	I	T1	N0	M0	Blank(s)	Blank(s)	Blank(s)	Blank(s)	Blank(s)	Localized	23	None	None; diagnosed at autopsy	20	0	Blank(s)	Blank(s)	Blank(s)	Blank(s)	Blank(s)	Blank(s)	Blank(s)	Blank(s)	Blank(s)	Blank(s)	Blank(s)	Blank(s)	Blank(s)	988	0	98	Blank(s)	Alive	N/A not first tumor	N/A not first tumor	33
Any Medicaid	Widowed	84	1925	2010	May	Male	Other (American Indian/AK Native, Asian/Pacific Islander)	C22.1-Intrahepatic bile duct	8160/3: Cholangiocarcinoma	Unknown	8.6.3 Carcinoma of liver and intrahepatic bile ducts	VII(b) Hepatic carcinomas	Radiography without microscopic confirm	I	T1	N0	M0	Blank(s)	Blank(s)	Blank(s)	Blank(s)	Blank(s)	Localized	0	None	None; diagnosed at autopsy	999	999	Blank(s)	Blank(s)	Blank(s)	Blank(s)	Blank(s)	Blank(s)	Blank(s)	Blank(s)	Blank(s)	Blank(s)	Blank(s)	Blank(s)	Blank(s)	988	0	98	Blank(s)	Intrahepatic Bile Duct	N/A not first tumor	N/A not first tumor	7
Blank(s)	Widowed	87	1919	2006	October	Male	White	C22.0-Liver	8170/3: Hepatocellular carcinoma, NOS	Unknown	8.6.3 Carcinoma of liver and intrahepatic bile ducts	VII(b) Hepatic carcinomas	Positive histology	UNK Stage	TX	N0	M0	Blank(s)	Blank(s)	Blank(s)	Blank(s)	Blank(s)	Localized	0	None	None; diagnosed at autopsy	20	0	Blank(s)	Blank(s)	Blank(s)	Blank(s)	Blank(s)	Blank(s)	Blank(s)	Blank(s)	Blank(s)	Blank(s)	Blank(s)	Blank(s)	Blank(s)	988	0	98	Blank(s)	Liver	N/A not first tumor	N/A not first tumor	10
Blank(s)	Divorced	85	1919	2004	October	Male	White	C22.0-Liver	8170/3: Hepatocellular carcinoma, NOS	Well differentiated; Grade I	8.6.3 Carcinoma of liver and intrahepatic bile ducts	VII(b) Hepatic carcinomas	Positive exfoliative cytology, no positive histology	IV	T1	N1	M1	Blank(s)	Blank(s)	Blank(s)	Blank(s)	Blank(s)	Distant	0	None	None; diagnosed at autopsy	10	999	Blank(s)	Blank(s)	Blank(s)	Blank(s)	Blank(s)	Blank(s)	Blank(s)	Blank(s)	Blank(s)	Blank(s)	Blank(s)	Blank(s)	Blank(s)	988	0	98	Blank(s)	Miscellaneous Malignant Cancer	N/A not first tumor	N/A not first tumor	3
Insured	Divorced	69	1939	2008	August	Male	White	C22.0-Liver	8140/3: Adenocarcinoma, NOS	Unknown	8.6.3 Carcinoma of liver and intrahepatic bile ducts	VII(b) Hepatic carcinomas	Positive histology	IV	T1	N0	M1	Blank(s)	Blank(s)	Blank(s)	Blank(s)	Blank(s)	Distant	0	None	None; diagnosed at autopsy	998	999	Blank(s)	Blank(s)	Blank(s)	Blank(s)	Blank(s)	Blank(s)	Blank(s)	Blank(s)	Blank(s)	Blank(s)	Blank(s)	Blank(s)	Blank(s)	988	0	98	Blank(s)	Intrahepatic Bile Duct	N/A not first tumor	N/A not first tumor	9
Any Medicaid	Single (never married)	31	1975	2007	February	Female	Other (American Indian/AK Native, Asian/Pacific Islander)	C22.0-Liver	8170/3: Hepatocellular carcinoma, NOS	Unknown	8.6.3 Carcinoma of liver and intrahepatic bile ducts	VII(b) Hepatic carcinomas	Positive laboratory test/marker study	IV	T3	N0	M1	Blank(s)	Blank(s)	Blank(s)	Blank(s)	Blank(s)	Distant	0	None	None; diagnosed at autopsy	10	999	Blank(s)	Blank(s)	Blank(s)	Blank(s)	Blank(s)	Blank(s)	Blank(s)	Blank(s)	Blank(s)	Blank(s)	Blank(s)	Blank(s)	Blank(s)	988	0	98	Blank(s)	Liver	N/A not first tumor	N/A not first tumor	4
Blank(s)	Widowed	78	1925	2004	May	Male	White	C22.0-Liver	8000/3: Neoplasm, malignant	Unknown	10 Unspecified Malignant Neoplasms	VII(c) Unspecified malignant hepatic tumors	Unknown	UNK Stage	TX	NX	MX	Blank(s)	Blank(s)	Blank(s)	Blank(s)	Blank(s)	Unknown/unstaged	99	Unknown or not applicable	Unknown; death certificate only	999	999	Blank(s)	Blank(s)	Blank(s)	Blank(s)	Blank(s)	Blank(s)	Blank(s)	Blank(s)	Blank(s)	Blank(s)	Blank(s)	Blank(s)	Blank(s)	988	99	99	Blank(s)	Liver	N/A not first tumor	N/A not first tumor	Unknown
Insured	Married (including common law)	47	1962	2009	August	Female	White	C22.1-Intrahepatic bile duct	8160/3: Cholangiocarcinoma	Poorly differentiated; Grade III	8.6.3 Carcinoma of liver and intrahepatic bile ducts	VII(b) Hepatic carcinomas	Positive histology	II	T2	N0	M0	Blank(s)	Blank(s)	Blank(s)	Blank(s)	Blank(s)	Localized	36	None	None; diagnosed at autopsy	20	999	Blank(s)	Blank(s)	Blank(s)	Blank(s)	Blank(s)	Blank(s)	Blank(s)	Blank(s)	Blank(s)	Blank(s)	Blank(s)	Blank(s)	Blank(s)	988	0	98	Blank(s)	Intrahepatic Bile Duct	N/A not first tumor	N/A not first tumor	37
Insured	Married (including common law)	79	1930	2010	March	Female	Other (American Indian/AK Native, Asian/Pacific Islander)	C22.0-Liver	8170/3: Hepatocellular carcinoma, NOS	Moderately differentiated; Grade II	8.6.3 Carcinoma of liver and intrahepatic bile ducts	VII(b) Hepatic carcinomas	Positive histology	I	T1	N0	M0	Blank(s)	Blank(s)	Blank(s)	Blank(s)	Blank(s)	Localized	0	None	None; diagnosed at autopsy	20	1	Blank(s)	Blank(s)	Blank(s)	Blank(s)	Blank(s)	Blank(s)	Blank(s)	Blank(s)	Blank(s)	Blank(s)	Blank(s)	Blank(s)	Blank(s)	988	0	98	Blank(s)	Liver	N/A not first tumor	N/A not first tumor	30
Blank(s)	Widowed	84	1919	2004	April	Female	Black	C22.0-Liver	8170/3: Hepatocellular carcinoma, NOS	Unknown	8.6.3 Carcinoma of liver and intrahepatic bile ducts	VII(b) Hepatic carcinomas	Positive laboratory test/marker study	UNK Stage	TX	NX	MX	Blank(s)	Blank(s)	Blank(s)	Blank(s)	Blank(s)	Unknown/unstaged	0	None	None; diagnosed at autopsy	10	999	Blank(s)	Blank(s)	Blank(s)	Blank(s)	Blank(s)	Blank(s)	Blank(s)	Blank(s)	Blank(s)	Blank(s)	Blank(s)	Blank(s)	Blank(s)	988	0	98	Blank(s)	Liver	N/A not first tumor	N/A not first tumor	0
Insurance status unknown	Married (including common law)	52	1958	2011	July	Female	White	C22.0-Liver	8000/3: Neoplasm, malignant	Unknown	10 Unspecified Malignant Neoplasms	VII(c) Unspecified malignant hepatic tumors	Unknown	UNK Stage	TX	NX	MX	Blank(s)	Blank(s)	Blank(s)	Blank(s)	Blank(s)	Unknown/unstaged	99	Unknown or not applicable	Unknown; death certificate only	999	999	Blank(s)	Blank(s)	Blank(s)	Blank(s)	Blank(s)	Blank(s)	Blank(s)	Blank(s)	Blank(s)	Blank(s)	Blank(s)	Blank(s)	Blank(s)	988	99	99	Blank(s)	Liver	N/A not first tumor	N/A not first tumor	Unknown
Insured	Married (including common law)	55	1952	2008	May	Female	White	C22.1-Intrahepatic bile duct	8160/3: Cholangiocarcinoma	Unknown	8.6.3 Carcinoma of liver and intrahepatic bile ducts	VII(b) Hepatic carcinomas	Positive histology	I	T1	N0	M0	Blank(s)	Blank(s)	Blank(s)	Blank(s)	Blank(s)	Regional	0	None	None; diagnosed at autopsy	998	999	Blank(s)	Blank(s)	Blank(s)	Blank(s)	Blank(s)	Blank(s)	Blank(s)	Blank(s)	Blank(s)	Blank(s)	Blank(s)	Blank(s)	Blank(s)	988	0	98	Blank(s)	Intrahepatic Bile Duct	N/A not first tumor	N/A not first tumor	16
Blank(s)	Divorced	57	1947	2004	June	Female	Black	C22.0-Liver	8170/3: Hepatocellular carcinoma, NOS	Unknown	8.6.3 Carcinoma of liver and intrahepatic bile ducts	VII(b) Hepatic carcinomas	Positive histology	II	T2	N0	M0	Blank(s)	Blank(s)	Blank(s)	Blank(s)	Blank(s)	Localized	0	None	None; diagnosed at autopsy	999	999	Blank(s)	Blank(s)	Blank(s)	Blank(s)	Blank(s)	Blank(s)	Blank(s)	Blank(s)	Blank(s)	Blank(s)	Blank(s)	Blank(s)	Blank(s)	988	0	98	Blank(s)	Other Cause of Death	N/A not first tumor	N/A not first tumor	14
Insured	Married (including common law)	71	1938	2010	May	Male	White	C22.0-Liver	8140/3: Adenocarcinoma, NOS	Moderately differentiated; Grade II	8.6.3 Carcinoma of liver and intrahepatic bile ducts	VII(b) Hepatic carcinomas	Positive histology	I	T1	N0	M0	Blank(s)	Blank(s)	Blank(s)	Blank(s)	Blank(s)	Regional	0	None	None; diagnosed at autopsy	10	999	Blank(s)	Blank(s)	Blank(s)	Blank(s)	Blank(s)	Blank(s)	Blank(s)	Blank(s)	Blank(s)	Blank(s)	Blank(s)	Blank(s)	Blank(s)	988	0	98	Blank(s)	Other Diseases of Arteries, Arterioles, Capillaries	N/A not first tumor	N/A not first tumor	12
Blank(s)	Widowed	71	1933	2005	March	Female	White	C22.0-Liver	8171/3: Hepatocellular carcinoma, fibrolamellar	Poorly differentiated; Grade III	8.6.3 Carcinoma of liver and intrahepatic bile ducts	VII(b) Hepatic carcinomas	Positive histology	I	T1	N0	M0	Blank(s)	Blank(s)	Blank(s)	Blank(s)	Blank(s)	Localized	36	4 or more regional lymph nodes removed	None; diagnosed at autopsy	10	999	Blank(s)	Blank(s)	Blank(s)	Blank(s)	Blank(s)	Blank(s)	Blank(s)	Blank(s)	Blank(s)	Blank(s)	Blank(s)	Blank(s)	Blank(s)	988	4	0	Blank(s)	Liver	N/A not first tumor	N/A not first tumor	1
Insured	Widowed	90	1922	2013	August	Female	Black	C22.0-Liver	8180/3: Combined hepatocellular carcinoma and cholangiocarcinoma	Unknown	8.6.3 Carcinoma of liver and intrahepatic bile ducts	VII(b) Hepatic carcinomas	Positive histology	II	T2	N0	M0	Blank(s)	Blank(s)	Blank(s)	Blank(s)	Blank(s)	Regional	0	None	None; diagnosed at autopsy	999	999	Blank(s)	Blank(s)	Blank(s)	Blank(s)	Blank(s)	Blank(s)	Blank(s)	Blank(s)	Blank(s)	Blank(s)	Blank(s)	Blank(s)	Blank(s)	988	0	98	Blank(s)	Liver	N/A not first tumor	N/A not first tumor	1
Any Medicaid	Single (never married)	63	1950	2014	July	Female	White	C22.0-Liver	8170/3: Hepatocellular carcinoma, NOS	Unknown	8.6.3 Carcinoma of liver and intrahepatic bile ducts	VII(b) Hepatic carcinomas	Radiography without microscopic confirm	II	T2	N0	M0	Blank(s)	Blank(s)	Blank(s)	Blank(s)	Blank(s)	Regional	0	None	None; diagnosed at autopsy	20	999	Blank(s)	Blank(s)	Blank(s)	Blank(s)	Blank(s)	Blank(s)	Blank(s)	Blank(s)	Blank(s)	Blank(s)	Blank(s)	Blank(s)	Blank(s)	988	0	98	Blank(s)	Liver	N/A not first tumor	N/A not first tumor	10
Insured/No specifics	Married (including common law)	71	1939	2011	July	Female	White	C22.1-Intrahepatic bile duct	8160/3: Cholangiocarcinoma	Unknown	8.6.3 Carcinoma of liver and intrahepatic bile ducts	VII(b) Hepatic carcinomas	Radiography without microscopic confirm	IIIA	T3	N0	M0	Blank(s)	Blank(s)	Blank(s)	Blank(s)	Blank(s)	Regional	0	None	None; diagnosed at autopsy	999	999	Blank(s)	Blank(s)	Blank(s)	Blank(s)	Blank(s)	Blank(s)	Blank(s)	Blank(s)	Blank(s)	Blank(s)	Blank(s)	Blank(s)	Blank(s)	988	0	98	Blank(s)	Intrahepatic Bile Duct	N/A not first tumor	N/A not first tumor	11
Blank(s)	Single (never married)	81	1923	2004	December	Female	Other (American Indian/AK Native, Asian/Pacific Islander)	C22.0-Liver	8170/3: Hepatocellular carcinoma, NOS	Well differentiated; Grade I	8.6.3 Carcinoma of liver and intrahepatic bile ducts	VII(b) Hepatic carcinomas	Positive histology	I	T1	N0	M0	Blank(s)	Blank(s)	Blank(s)	Blank(s)	Blank(s)	Localized	0	None	None; diagnosed at autopsy	20	999	Blank(s)	Blank(s)	Blank(s)	Blank(s)	Blank(s)	Blank(s)	Blank(s)	Blank(s)	Blank(s)	Blank(s)	Blank(s)	Blank(s)	Blank(s)	988	0	98	Blank(s)	Liver	N/A not first tumor	N/A not first tumor	14
Insured	Widowed	85	1924	2010	March	Male	White	C22.0-Liver	8170/3: Hepatocellular carcinoma, NOS	Unknown	8.6.3 Carcinoma of liver and intrahepatic bile ducts	VII(b) Hepatic carcinomas	Radiography without microscopic confirm	II	T2	N0	M0	Blank(s)	Blank(s)	Blank(s)	Blank(s)	Blank(s)	Regional	0	None	None; diagnosed at autopsy	10	999	Blank(s)	Blank(s)	Blank(s)	Blank(s)	Blank(s)	Blank(s)	Blank(s)	Blank(s)	Blank(s)	Blank(s)	Blank(s)	Blank(s)	Blank(s)	988	0	98	Blank(s)	Other Cause of Death	N/A not first tumor	N/A not first tumor	2
Any Medicaid	Single (never married)	79	1933	2012	August	Male	Other (American Indian/AK Native, Asian/Pacific Islander)	C22.0-Liver	8170/3: Hepatocellular carcinoma, NOS	Unknown	8.6.3 Carcinoma of liver and intrahepatic bile ducts	VII(b) Hepatic carcinomas	Positive histology	IV	T3	N0	M1	Blank(s)	Blank(s)	Blank(s)	Blank(s)	Blank(s)	Distant	0	None	None; diagnosed at autopsy	998	999	Blank(s)	Blank(s)	Blank(s)	Blank(s)	Blank(s)	Blank(s)	Blank(s)	Blank(s)	Blank(s)	Blank(s)	Blank(s)	Blank(s)	Blank(s)	988	95	0	Blank(s)	Liver	N/A not first tumor	N/A not first tumor	3
Blank(s)	Married (including common law)	66	1940	2006	December	Female	White	C22.1-Intrahepatic bile duct	8160/3: Cholangiocarcinoma	Unknown	8.6.3 Carcinoma of liver and intrahepatic bile ducts	VII(b) Hepatic carcinomas	Positive histology	UNK Stage	T2	N1	MX	Blank(s)	Blank(s)	Blank(s)	Blank(s)	Blank(s)	Regional	0	None	None; diagnosed at autopsy	998	999	Blank(s)	Blank(s)	Blank(s)	Blank(s)	Blank(s)	Blank(s)	Blank(s)	Blank(s)	Blank(s)	Blank(s)	Blank(s)	Blank(s)	Blank(s)	988	0	98	Blank(s)	Intrahepatic Bile Duct	N/A not first tumor	N/A not first tumor	1
Any Medicaid	Widowed	100	1908	2009	June	Female	White	C22.1-Intrahepatic bile duct	8162/3: Klatskin tumor	Unknown	8.6.3 Carcinoma of liver and intrahepatic bile ducts	VII(b) Hepatic carcinomas	Radiography without microscopic confirm	UNK Stage	TX	NX	MX	Blank(s)	Blank(s)	Blank(s)	Blank(s)	Blank(s)	Unknown/unstaged	0	None	None; diagnosed at autopsy	999	999	Blank(s)	Blank(s)	Blank(s)	Blank(s)	Blank(s)	Blank(s)	Blank(s)	Blank(s)	Blank(s)	Blank(s)	Blank(s)	Blank(s)	Blank(s)	988	0	98	Blank(s)	Other Biliary	N/A not first tumor	N/A not first tumor	0
Blank(s)	Married (including common law)	76	1929	2006	January	Male	White	C22.0-Liver	8170/3: Hepatocellular carcinoma, NOS	Unknown	8.6.3 Carcinoma of liver and intrahepatic bile ducts	VII(b) Hepatic carcinomas	Radiography without microscopic confirm	IV	T1	N1	M1	Blank(s)	Blank(s)	Blank(s)	Blank(s)	Blank(s)	Distant	0	None	None; diagnosed at autopsy	10	1	Blank(s)	Blank(s)	Blank(s)	Blank(s)	Blank(s)	Blank(s)	Blank(s)	Blank(s)	Blank(s)	Blank(s)	Blank(s)	Blank(s)	Blank(s)	988	0	98	Blank(s)	Liver	N/A not first tumor	N/A not first tumor	3
Insured	Married (including common law)	60	1947	2008	February	Male	White	C22.0-Liver	8170/3: Hepatocellular carcinoma, NOS	Unknown	8.6.3 Carcinoma of liver and intrahepatic bile ducts	VII(b) Hepatic carcinomas	Radiography without microscopic confirm	I	T1	N0	M0	Blank(s)	Blank(s)	Blank(s)	Blank(s)	Blank(s)	Localized	16	None	None; diagnosed at autopsy	20	999	Blank(s)	Blank(s)	Blank(s)	Blank(s)	Blank(s)	Blank(s)	Blank(s)	Blank(s)	Blank(s)	Blank(s)	Blank(s)	Blank(s)	Blank(s)	988	0	98	Blank(s)	Liver	N/A not first tumor	N/A not first tumor	38
Insured/No specifics	Widowed	75	1938	2014	January	Female	White	C22.0-Liver	8170/3: Hepatocellular carcinoma, NOS	Moderately differentiated; Grade II	8.6.3 Carcinoma of liver and intrahepatic bile ducts	VII(b) Hepatic carcinomas	Positive histology	IIIA	T3	N0	M0	Blank(s)	Blank(s)	Blank(s)	Blank(s)	Blank(s)	Localized	0	None	None; diagnosed at autopsy	10	999	Blank(s)	Blank(s)	Blank(s)	Blank(s)	Blank(s)	Blank(s)	Blank(s)	Blank(s)	Blank(s)	Blank(s)	Blank(s)	Blank(s)	Blank(s)	988	0	98	Blank(s)	Alive	N/A not first tumor	N/A not first tumor	35
Insured	Married (including common law)	68	1942	2011	January	Female	White	C22.0-Liver	8170/3: Hepatocellular carcinoma, NOS	Unknown	8.6.3 Carcinoma of liver and intrahepatic bile ducts	VII(b) Hepatic carcinomas	Radiography without microscopic confirm	I	T1	N0	M0	Blank(s)	Blank(s)	Blank(s)	Blank(s)	Blank(s)	Localized	0	None	None; diagnosed at autopsy	20	999	Blank(s)	Blank(s)	Blank(s)	Blank(s)	Blank(s)	Blank(s)	Blank(s)	Blank(s)	Blank(s)	Blank(s)	Blank(s)	Blank(s)	Blank(s)	988	0	98	Blank(s)	Liver	N/A not first tumor	N/A not first tumor	8
Insured	Married (including common law)	71	1940	2011	November	Male	White	C22.0-Liver	8170/3: Hepatocellular carcinoma, NOS	Unknown	8.6.3 Carcinoma of liver and intrahepatic bile ducts	VII(b) Hepatic carcinomas	Radiography without microscopic confirm	I	T1	N0	M0	Blank(s)	Blank(s)	Blank(s)	Blank(s)	Blank(s)	Localized	16	None	None; diagnosed at autopsy	20	999	Blank(s)	Blank(s)	Blank(s)	Blank(s)	Blank(s)	Blank(s)	Blank(s)	Blank(s)	Blank(s)	Blank(s)	Blank(s)	Blank(s)	Blank(s)	988	0	98	Blank(s)	Other Infectious and Parasitic Diseases including HIV	N/A not first tumor	N/A not first tumor	61
Uninsured	Widowed	82	1928	2011	May	Male	Other (American Indian/AK Native, Asian/Pacific Islander)	C22.0-Liver	8170/3: Hepatocellular carcinoma, NOS	Unknown	8.6.3 Carcinoma of liver and intrahepatic bile ducts	VII(b) Hepatic carcinomas	Radiography without microscopic confirm	II	T2	N0	M0	Blank(s)	Blank(s)	Blank(s)	Blank(s)	Blank(s)	Localized	0	None	None; diagnosed at autopsy	998	999	Blank(s)	Blank(s)	Blank(s)	Blank(s)	Blank(s)	Blank(s)	Blank(s)	Blank(s)	Blank(s)	Blank(s)	Blank(s)	Blank(s)	Blank(s)	988	0	98	Blank(s)	Other Infectious and Parasitic Diseases including HIV	N/A not first tumor	N/A not first tumor	10
Insured	Widowed	82	1926	2008	October	Female	White	C22.0-Liver	8170/3: Hepatocellular carcinoma, NOS	Unknown	8.6.3 Carcinoma of liver and intrahepatic bile ducts	VII(b) Hepatic carcinomas	Positive histology	I	T1	N0	M0	Blank(s)	Blank(s)	Blank(s)	Blank(s)	Blank(s)	Localized	13	None	None; diagnosed at autopsy	20	999	Blank(s)	Blank(s)	Blank(s)	Blank(s)	Blank(s)	Blank(s)	Blank(s)	Blank(s)	Blank(s)	Blank(s)	Blank(s)	Blank(s)	Blank(s)	988	0	98	Blank(s)	Chronic Liver Disease and Cirrhosis	N/A not first tumor	N/A not first tumor	6
Insured	Married (including common law)	60	1946	2007	May	Male	White	C22.0-Liver	8140/3: Adenocarcinoma, NOS	Moderately differentiated; Grade II	8.6.3 Carcinoma of liver and intrahepatic bile ducts	VII(b) Hepatic carcinomas	Positive histology	UNK Stage	T1	NX	M0	Blank(s)	Blank(s)	Blank(s)	Blank(s)	Blank(s)	Localized	0	Unknown or not applicable	None; diagnosed at autopsy	999	999	Blank(s)	Blank(s)	Blank(s)	Blank(s)	Blank(s)	Blank(s)	Blank(s)	Blank(s)	Blank(s)	Blank(s)	Blank(s)	Blank(s)	Blank(s)	988	99	99	Blank(s)	Liver	N/A not first tumor	N/A not first tumor	2
Any Medicaid	Married (including common law)	73	1937	2011	April	Female	Other (American Indian/AK Native, Asian/Pacific Islander)	C22.0-Liver	8170/3: Hepatocellular carcinoma, NOS	Moderately differentiated; Grade II	8.6.3 Carcinoma of liver and intrahepatic bile ducts	VII(b) Hepatic carcinomas	Positive histology	I	T1	N0	M0	Blank(s)	Blank(s)	Blank(s)	Blank(s)	Blank(s)	Localized	22	None	None; diagnosed at autopsy	20	999	Blank(s)	Blank(s)	Blank(s)	Blank(s)	Blank(s)	Blank(s)	Blank(s)	Blank(s)	Blank(s)	Blank(s)	Blank(s)	Blank(s)	Blank(s)	988	0	98	Blank(s)	Miscellaneous Malignant Cancer	N/A not first tumor	N/A not first tumor	23
Insurance status unknown	Widowed	86	1923	2010	August	Female	White	C22.0-Liver	8010/3: Carcinoma, NOS	Unknown	8.6.3 Carcinoma of liver and intrahepatic bile ducts	VII(b) Hepatic carcinomas	Unknown	UNK Stage	TX	NX	MX	Blank(s)	Blank(s)	Blank(s)	Blank(s)	Blank(s)	Unknown/unstaged	99	Unknown or not applicable	Unknown; death certificate only	999	999	Blank(s)	Blank(s)	Blank(s)	Blank(s)	Blank(s)	Blank(s)	Blank(s)	Blank(s)	Blank(s)	Blank(s)	Blank(s)	Blank(s)	Blank(s)	988	99	99	Blank(s)	Diseases of Heart	N/A not first tumor	N/A not first tumor	Unknown
Insured/No specifics	Married (including common law)	73	1937	2010	October	Female	White	C22.0-Liver	8172/3: Hepatocellular carcinoma, scirrhous	Unknown	8.6.3 Carcinoma of liver and intrahepatic bile ducts	VII(b) Hepatic carcinomas	Radiography without microscopic confirm	II	T2	N0	M0	Blank(s)	Blank(s)	Blank(s)	Blank(s)	Blank(s)	Regional	0	None	None; diagnosed at autopsy	10	0	Blank(s)	Blank(s)	Blank(s)	Blank(s)	Blank(s)	Blank(s)	Blank(s)	Blank(s)	Blank(s)	Blank(s)	Blank(s)	Blank(s)	Blank(s)	988	0	98	Blank(s)	Liver	N/A not first tumor	N/A not first tumor	13
Insured	Single (never married)	60	1949	2010	January	Male	Black	C22.0-Liver	8170/3: Hepatocellular carcinoma, NOS	Unknown	8.6.3 Carcinoma of liver and intrahepatic bile ducts	VII(b) Hepatic carcinomas	Positive exfoliative cytology, no positive histology	IV	TX	NX	M1	Blank(s)	Blank(s)	Blank(s)	Blank(s)	Blank(s)	Distant	0	None	None; diagnosed at autopsy	20	999	Blank(s)	Blank(s)	Blank(s)	Blank(s)	Blank(s)	Blank(s)	Blank(s)	Blank(s)	Blank(s)	Blank(s)	Blank(s)	Blank(s)	Blank(s)	988	0	98	Blank(s)	Liver	N/A not first tumor	N/A not first tumor	2
Blank(s)	Widowed	74	1931	2005	December	Female	White	C22.0-Liver	8170/3: Hepatocellular carcinoma, NOS	Undifferentiated; anaplastic; Grade IV	8.6.3 Carcinoma of liver and intrahepatic bile ducts	VII(b) Hepatic carcinomas	Positive exfoliative cytology, no positive histology	IIIC	T1	N1	M0	Blank(s)	Blank(s)	Blank(s)	Blank(s)	Blank(s)	Regional	26	4 or more regional lymph nodes removed	None; diagnosed at autopsy	10	999	Blank(s)	Blank(s)	Blank(s)	Blank(s)	Blank(s)	Blank(s)	Blank(s)	Blank(s)	Blank(s)	Blank(s)	Blank(s)	Blank(s)	Blank(s)	988	4	1	Blank(s)	Alive	N/A not first tumor	N/A not first tumor	132
Insured	Married (including common law)	49	1957	2007	May	Female	White	C22.0-Liver	8170/3: Hepatocellular carcinoma, NOS	Moderately differentiated; Grade II	8.6.3 Carcinoma of liver and intrahepatic bile ducts	VII(b) Hepatic carcinomas	Positive histology	II	T2	N0	M0	Blank(s)	Blank(s)	Blank(s)	Blank(s)	Blank(s)	Localized	61	1 to 3 regional lymph nodes removed	None; diagnosed at autopsy	10	1	Blank(s)	Blank(s)	Blank(s)	Blank(s)	Blank(s)	Blank(s)	Blank(s)	Blank(s)	Blank(s)	Blank(s)	Blank(s)	Blank(s)	Blank(s)	988	1	0	Blank(s)	Liver	N/A not first tumor	N/A not first tumor	61
Blank(s)	Married (including common law)	64	1942	2006	November	Male	White	C22.0-Liver	8170/3: Hepatocellular carcinoma, NOS	Unknown	8.6.3 Carcinoma of liver and intrahepatic bile ducts	VII(b) Hepatic carcinomas	Radiography without microscopic confirm	IIIA	T3	N0	M0	Blank(s)	Blank(s)	Blank(s)	Blank(s)	Blank(s)	Localized	0	None	None; diagnosed at autopsy	20	999	Blank(s)	Blank(s)	Blank(s)	Blank(s)	Blank(s)	Blank(s)	Blank(s)	Blank(s)	Blank(s)	Blank(s)	Blank(s)	Blank(s)	Blank(s)	988	0	98	Blank(s)	Miscellaneous Malignant Cancer	N/A not first tumor	N/A not first tumor	60
Blank(s)	Married (including common law)	61	1943	2005	July	Female	Other (American Indian/AK Native, Asian/Pacific Islander)	C22.0-Liver	8170/3: Hepatocellular carcinoma, NOS	Moderately differentiated; Grade II	8.6.3 Carcinoma of liver and intrahepatic bile ducts	VII(b) Hepatic carcinomas	Positive histology	I	T1	N0	M0	Blank(s)	Blank(s)	Blank(s)	Blank(s)	Blank(s)	Localized	0	None	None; diagnosed at autopsy	10	999	Blank(s)	Blank(s)	Blank(s)	Blank(s)	Blank(s)	Blank(s)	Blank(s)	Blank(s)	Blank(s)	Blank(s)	Blank(s)	Blank(s)	Blank(s)	988	0	98	Blank(s)	Alive	N/A not first tumor	N/A not first tumor	137
Insured	Divorced	70	1939	2009	June	Female	White	C22.0-Liver	8170/3: Hepatocellular carcinoma, NOS	Unknown	8.6.3 Carcinoma of liver and intrahepatic bile ducts	VII(b) Hepatic carcinomas	Positive histology	IV	T2	N0	M1	Blank(s)	Blank(s)	Blank(s)	Blank(s)	Blank(s)	Distant	0	None	None; diagnosed at autopsy	10	999	Blank(s)	Blank(s)	Blank(s)	Blank(s)	Blank(s)	Blank(s)	Blank(s)	Blank(s)	Blank(s)	Blank(s)	Blank(s)	Blank(s)	Blank(s)	988	0	98	Blank(s)	Liver	N/A not first tumor	N/A not first tumor	12
Blank(s)	Widowed	83	1921	2004	July	Female	Other (American Indian/AK Native, Asian/Pacific Islander)	C22.0-Liver	8170/3: Hepatocellular carcinoma, NOS	Unknown	8.6.3 Carcinoma of liver and intrahepatic bile ducts	VII(b) Hepatic carcinomas	Positive exfoliative cytology, no positive histology	I	T1	N0	M0	Blank(s)	Blank(s)	Blank(s)	Blank(s)	Blank(s)	Localized	0	None	None; diagnosed at autopsy	20	999	Blank(s)	Blank(s)	Blank(s)	Blank(s)	Blank(s)	Blank(s)	Blank(s)	Blank(s)	Blank(s)	Blank(s)	Blank(s)	Blank(s)	Blank(s)	988	0	98	Blank(s)	Liver	N/A not first tumor	N/A not first tumor	4
Insurance status unknown	Widowed	78	1933	2011	December	Female	Other (American Indian/AK Native, Asian/Pacific Islander)	C22.0-Liver	8000/3: Neoplasm, malignant	Unknown	10 Unspecified Malignant Neoplasms	VII(c) Unspecified malignant hepatic tumors	Unknown	UNK Stage	TX	NX	MX	Blank(s)	Blank(s)	Blank(s)	Blank(s)	Blank(s)	Unknown/unstaged	99	Unknown or not applicable	Unknown; death certificate only	999	999	Blank(s)	Blank(s)	Blank(s)	Blank(s)	Blank(s)	Blank(s)	Blank(s)	Blank(s)	Blank(s)	Blank(s)	Blank(s)	Blank(s)	Blank(s)	988	99	99	Blank(s)	Liver	N/A not first tumor	N/A not first tumor	Unknown
Insured	Married (including common law)	86	1923	2009	December	Male	White	C22.0-Liver	8170/3: Hepatocellular carcinoma, NOS	Unknown	8.6.3 Carcinoma of liver and intrahepatic bile ducts	VII(b) Hepatic carcinomas	Radiography without microscopic confirm	IIIB	T4	N0	M0	Blank(s)	Blank(s)	Blank(s)	Blank(s)	Blank(s)	Distant	0	None	None; diagnosed at autopsy	10	1	Blank(s)	Blank(s)	Blank(s)	Blank(s)	Blank(s)	Blank(s)	Blank(s)	Blank(s)	Blank(s)	Blank(s)	Blank(s)	Blank(s)	Blank(s)	988	0	98	Blank(s)	Melanoma of the Skin	N/A not first tumor	N/A not first tumor	3
Blank(s)	Widowed	79	1925	2004	April	Female	White	C22.0-Liver	8170/3: Hepatocellular carcinoma, NOS	Well differentiated; Grade I	8.6.3 Carcinoma of liver and intrahepatic bile ducts	VII(b) Hepatic carcinomas	Positive histology	I	T1	N0	M0	Blank(s)	Blank(s)	Blank(s)	Blank(s)	Blank(s)	Localized	10	None	None; diagnosed at autopsy	10	999	Blank(s)	Blank(s)	Blank(s)	Blank(s)	Blank(s)	Blank(s)	Blank(s)	Blank(s)	Blank(s)	Blank(s)	Blank(s)	Blank(s)	Blank(s)	988	0	98	Blank(s)	Liver	N/A not first tumor	N/A not first tumor	24
Insured/No specifics	Married (including common law)	73	1933	2007	July	Male	White	C22.1-Intrahepatic bile duct	8160/3: Cholangiocarcinoma	Moderately differentiated; Grade II	8.6.3 Carcinoma of liver and intrahepatic bile ducts	VII(b) Hepatic carcinomas	Positive histology	IIIC	T1	N1	M0	Blank(s)	Blank(s)	Blank(s)	Blank(s)	Blank(s)	Regional	36	4 or more regional lymph nodes removed	None; diagnosed at autopsy	999	999	Blank(s)	Blank(s)	Blank(s)	Blank(s)	Blank(s)	Blank(s)	Blank(s)	Blank(s)	Blank(s)	Blank(s)	Blank(s)	Blank(s)	Blank(s)	988	8	1	Blank(s)	Intrahepatic Bile Duct	N/A not first tumor	N/A not first tumor	47
Insured	Single (never married)	72	1942	2014	May	Female	Other (American Indian/AK Native, Asian/Pacific Islander)	C22.0-Liver	8170/3: Hepatocellular carcinoma, NOS	Well differentiated; Grade I	8.6.3 Carcinoma of liver and intrahepatic bile ducts	VII(b) Hepatic carcinomas	Positive histology	I	T1	N0	M0	Blank(s)	Blank(s)	Blank(s)	Blank(s)	Blank(s)	Localized	61	1 to 3 regional lymph nodes removed	None; diagnosed at autopsy	10	999	Blank(s)	Blank(s)	Blank(s)	Blank(s)	Blank(s)	Blank(s)	Blank(s)	Blank(s)	Blank(s)	Blank(s)	Blank(s)	Blank(s)	Blank(s)	988	1	0	Blank(s)	Alive	N/A not first tumor	N/A not first tumor	31
Blank(s)	Married (including common law)	73	1932	2006	February	Male	Black	C22.0-Liver	8170/3: Hepatocellular carcinoma, NOS	Unknown	8.6.3 Carcinoma of liver and intrahepatic bile ducts	VII(b) Hepatic carcinomas	Radiography without microscopic confirm	IIIA	T3	N0	M0	Blank(s)	Blank(s)	Blank(s)	Blank(s)	Blank(s)	Regional	0	None	None; diagnosed at autopsy	10	999	Blank(s)	Blank(s)	Blank(s)	Blank(s)	Blank(s)	Blank(s)	Blank(s)	Blank(s)	Blank(s)	Blank(s)	Blank(s)	Blank(s)	Blank(s)	988	0	98	Blank(s)	Liver	N/A not first tumor	N/A not first tumor	9
Insured/No specifics	Married (including common law)	65	1942	2008	August	Male	Black	C22.0-Liver	8170/3: Hepatocellular carcinoma, NOS	Unknown	8.6.3 Carcinoma of liver and intrahepatic bile ducts	VII(b) Hepatic carcinomas	Radiography without microscopic confirm	II	T2	N0	M0	Blank(s)	Blank(s)	Blank(s)	Blank(s)	Blank(s)	Regional	0	None	None; diagnosed at autopsy	20	999	Blank(s)	Blank(s)	Blank(s)	Blank(s)	Blank(s)	Blank(s)	Blank(s)	Blank(s)	Blank(s)	Blank(s)	Blank(s)	Blank(s)	Blank(s)	988	0	98	Blank(s)	Miscellaneous Malignant Cancer	N/A not first tumor	N/A not first tumor	42
Insured/No specifics	Widowed	78	1931	2009	October	Female	White	C22.0-Liver	8170/3: Hepatocellular carcinoma, NOS	Moderately differentiated; Grade II	8.6.3 Carcinoma of liver and intrahepatic bile ducts	VII(b) Hepatic carcinomas	Positive histology	II	T2	N0	M0	Blank(s)	Blank(s)	Blank(s)	Blank(s)	Blank(s)	Localized	0	None	None; diagnosed at autopsy	10	1	Blank(s)	Blank(s)	Blank(s)	Blank(s)	Blank(s)	Blank(s)	Blank(s)	Blank(s)	Blank(s)	Blank(s)	Blank(s)	Blank(s)	Blank(s)	988	0	98	Blank(s)	Other Digestive Organs	N/A not first tumor	N/A not first tumor	22
Insured/No specifics	Widowed	65	1948	2013	August	Female	White	C22.0-Liver	8170/3: Hepatocellular carcinoma, NOS	Unknown	8.6.3 Carcinoma of liver and intrahepatic bile ducts	VII(b) Hepatic carcinomas	Radiography without microscopic confirm	IIIA	T3	N0	M0	Blank(s)	Blank(s)	Blank(s)	Blank(s)	Blank(s)	Regional	0	None	None; diagnosed at autopsy	10	1	Blank(s)	Blank(s)	Blank(s)	Blank(s)	Blank(s)	Blank(s)	Blank(s)	Blank(s)	Blank(s)	Blank(s)	Blank(s)	Blank(s)	Blank(s)	988	0	98	Blank(s)	Liver	N/A not first tumor	N/A not first tumor	0
Blank(s)	Married (including common law)	85	1918	2004	July	Male	White	C22.0-Liver	8046/3: Non-small cell carcinoma	Poorly differentiated; Grade III	8.6.3 Carcinoma of liver and intrahepatic bile ducts	Not classified by ICCC or in situ	Positive histology	UNK Stage	TX	N0	MX	Blank(s)	Blank(s)	Blank(s)	Blank(s)	Blank(s)	Unknown/unstaged	0	None	None; diagnosed at autopsy	20	999	Blank(s)	Blank(s)	Blank(s)	Blank(s)	Blank(s)	Blank(s)	Blank(s)	Blank(s)	Blank(s)	Blank(s)	Blank(s)	Blank(s)	Blank(s)	988	0	98	Blank(s)	Liver	N/A not first tumor	N/A not first tumor	0
Insured	Married (including common law)	86	1920	2007	June	Male	White	C22.0-Liver	8140/3: Adenocarcinoma, NOS	Unknown	8.6.3 Carcinoma of liver and intrahepatic bile ducts	VII(b) Hepatic carcinomas	Positive histology	I	T1	N0	M0	Blank(s)	Blank(s)	Blank(s)	Blank(s)	Blank(s)	Localized	0	None	None; diagnosed at autopsy	20	999	Blank(s)	Blank(s)	Blank(s)	Blank(s)	Blank(s)	Blank(s)	Blank(s)	Blank(s)	Blank(s)	Blank(s)	Blank(s)	Blank(s)	Blank(s)	988	0	98	Blank(s)	Prostate	N/A not first tumor	N/A not first tumor	3
Insured	Single (never married)	82	1927	2010	February	Male	White	C22.1-Intrahepatic bile duct	8160/3: Cholangiocarcinoma	Unknown	8.6.3 Carcinoma of liver and intrahepatic bile ducts	VII(b) Hepatic carcinomas	Positive histology	II	T2	N0	M0	Blank(s)	Blank(s)	Blank(s)	Blank(s)	Blank(s)	Localized	37	1 to 3 regional lymph nodes removed	None; diagnosed at autopsy	20	999	Blank(s)	Blank(s)	Blank(s)	Blank(s)	Blank(s)	Blank(s)	Blank(s)	Blank(s)	Blank(s)	Blank(s)	Blank(s)	Blank(s)	Blank(s)	988	1	0	Blank(s)	State DC not available or state DC available but no COD	N/A not first tumor	N/A not first tumor	4
Any Medicaid	Widowed	95	1915	2010	March	Female	Other (American Indian/AK Native, Asian/Pacific Islander)	C22.0-Liver	8170/3: Hepatocellular carcinoma, NOS	Unknown	8.6.3 Carcinoma of liver and intrahepatic bile ducts	VII(b) Hepatic carcinomas	Positive laboratory test/marker study	UNK Stage	T1	NX	MX	Blank(s)	Blank(s)	Blank(s)	Blank(s)	Blank(s)	Localized	0	None	None; diagnosed at autopsy	10	999	Blank(s)	Blank(s)	Blank(s)	Blank(s)	Blank(s)	Blank(s)	Blank(s)	Blank(s)	Blank(s)	Blank(s)	Blank(s)	Blank(s)	Blank(s)	988	0	98	Blank(s)	Liver	N/A not first tumor	N/A not first tumor	1
Insured/No specifics	Married (including common law)	76	1933	2009	Blank(s)	Male	Other (American Indian/AK Native, Asian/Pacific Islander)	C22.0-Liver	8170/3: Hepatocellular carcinoma, NOS	Unknown	8.6.3 Carcinoma of liver and intrahepatic bile ducts	VII(b) Hepatic carcinomas	Positive histology	UNK Stage	TX	NX	MX	Blank(s)	Blank(s)	Blank(s)	Blank(s)	Blank(s)	Unknown/unstaged	0	None	None; diagnosed at autopsy	999	999	Blank(s)	Blank(s)	Blank(s)	Blank(s)	Blank(s)	Blank(s)	Blank(s)	Blank(s)	Blank(s)	Blank(s)	Blank(s)	Blank(s)	Blank(s)	988	0	98	Blank(s)	Liver	N/A not first tumor	N/A not first tumor	14
Insured	Married (including common law)	82	1925	2008	March	Male	White	C22.0-Liver	8170/3: Hepatocellular carcinoma, NOS	Well differentiated; Grade I	8.6.3 Carcinoma of liver and intrahepatic bile ducts	VII(b) Hepatic carcinomas	Positive histology	IV	T3	NX	M1	Blank(s)	Blank(s)	Blank(s)	Blank(s)	Blank(s)	Distant	0	None	None; diagnosed at autopsy	10	999	Blank(s)	Blank(s)	Blank(s)	Blank(s)	Blank(s)	Blank(s)	Blank(s)	Blank(s)	Blank(s)	Blank(s)	Blank(s)	Blank(s)	Blank(s)	988	0	98	Blank(s)	Liver	N/A not first tumor	N/A not first tumor	6
Insured	Married (including common law)	66	1941	2008	April	Female	White	C22.1-Intrahepatic bile duct	8160/3: Cholangiocarcinoma	Unknown	8.6.3 Carcinoma of liver and intrahepatic bile ducts	VII(b) Hepatic carcinomas	Positive histology	UNK Stage	TX	N0	M0	Blank(s)	Blank(s)	Blank(s)	Blank(s)	Blank(s)	Unknown/unstaged	0	None	None; diagnosed at autopsy	999	0	Blank(s)	Blank(s)	Blank(s)	Blank(s)	Blank(s)	Blank(s)	Blank(s)	Blank(s)	Blank(s)	Blank(s)	Blank(s)	Blank(s)	Blank(s)	988	0	98	Blank(s)	Intrahepatic Bile Duct	N/A not first tumor	N/A not first tumor	51
Blank(s)	Married (including common law)	59	1946	2006	July	Male	Black	C22.1-Intrahepatic bile duct	8160/3: Cholangiocarcinoma	Moderately differentiated; Grade II	8.6.3 Carcinoma of liver and intrahepatic bile ducts	VII(b) Hepatic carcinomas	Positive histology	IV	T2	N1	M1	Blank(s)	Blank(s)	Blank(s)	Blank(s)	Blank(s)	Distant	0	None	None; diagnosed at autopsy	999	999	Blank(s)	Blank(s)	Blank(s)	Blank(s)	Blank(s)	Blank(s)	Blank(s)	Blank(s)	Blank(s)	Blank(s)	Blank(s)	Blank(s)	Blank(s)	988	0	98	Blank(s)	Intrahepatic Bile Duct	N/A not first tumor	N/A not first tumor	14
Insured	Married (including common law)	70	1940	2011	July	Male	White	C22.0-Liver	8190/3: Trabecular adenocarcinoma	Moderately differentiated; Grade II	8.6.3 Carcinoma of liver and intrahepatic bile ducts	VII(b) Hepatic carcinomas	Positive histology	I	T1	N0	M0	Blank(s)	Blank(s)	Blank(s)	Blank(s)	Blank(s)	Localized	20	None	None; diagnosed at autopsy	20	999	Blank(s)	Blank(s)	Blank(s)	Blank(s)	Blank(s)	Blank(s)	Blank(s)	Blank(s)	Blank(s)	Blank(s)	Blank(s)	Blank(s)	Blank(s)	988	0	98	Blank(s)	Alive	N/A not first tumor	N/A not first tumor	65
Blank(s)	Widowed	74	1931	2005	August	Female	Black	C22.0-Liver	8170/3: Hepatocellular carcinoma, NOS	Unknown	8.6.3 Carcinoma of liver and intrahepatic bile ducts	VII(b) Hepatic carcinomas	Radiography without microscopic confirm	II	T2	N0	M0	Blank(s)	Blank(s)	Blank(s)	Blank(s)	Blank(s)	Regional	0	None	None; diagnosed at autopsy	998	999	Blank(s)	Blank(s)	Blank(s)	Blank(s)	Blank(s)	Blank(s)	Blank(s)	Blank(s)	Blank(s)	Blank(s)	Blank(s)	Blank(s)	Blank(s)	988	0	98	Blank(s)	Chronic Liver Disease and Cirrhosis	N/A not first tumor	N/A not first tumor	0
Insurance status unknown	Widowed	80	1930	2011	May	Female	White	C22.0-Liver	8010/3: Carcinoma, NOS	Unknown	8.6.3 Carcinoma of liver and intrahepatic bile ducts	VII(b) Hepatic carcinomas	Unknown	UNK Stage	TX	NX	MX	Blank(s)	Blank(s)	Blank(s)	Blank(s)	Blank(s)	Unknown/unstaged	99	Unknown or not applicable	Unknown; death certificate only	999	999	Blank(s)	Blank(s)	Blank(s)	Blank(s)	Blank(s)	Blank(s)	Blank(s)	Blank(s)	Blank(s)	Blank(s)	Blank(s)	Blank(s)	Blank(s)	988	99	99	Blank(s)	Liver	N/A not first tumor	N/A not first tumor	Unknown
Insured	Married (including common law)	81	1925	2007	February	Male	White	C22.1-Intrahepatic bile duct	8160/3: Cholangiocarcinoma	Unknown	8.6.3 Carcinoma of liver and intrahepatic bile ducts	VII(b) Hepatic carcinomas	Positive exfoliative cytology, no positive histology	IV	TX	NX	M1	Blank(s)	Blank(s)	Blank(s)	Blank(s)	Blank(s)	Distant	0	None	None; diagnosed at autopsy	999	999	Blank(s)	Blank(s)	Blank(s)	Blank(s)	Blank(s)	Blank(s)	Blank(s)	Blank(s)	Blank(s)	Blank(s)	Blank(s)	Blank(s)	Blank(s)	988	0	98	Blank(s)	Intrahepatic Bile Duct	N/A not first tumor	N/A not first tumor	8
Insured	Widowed	88	1924	2012	December	Male	White	C22.1-Intrahepatic bile duct	8160/3: Cholangiocarcinoma	Unknown	8.6.3 Carcinoma of liver and intrahepatic bile ducts	VII(b) Hepatic carcinomas	Radiography without microscopic confirm	UNK Stage	TX	N0	M0	Blank(s)	Blank(s)	Blank(s)	Blank(s)	Blank(s)	Unknown/unstaged	0	None	None; diagnosed at autopsy	998	999	Blank(s)	Blank(s)	Blank(s)	Blank(s)	Blank(s)	Blank(s)	Blank(s)	Blank(s)	Blank(s)	Blank(s)	Blank(s)	Blank(s)	Blank(s)	988	0	98	Blank(s)	Intrahepatic Bile Duct	N/A not first tumor	N/A not first tumor	0
Insured	Married (including common law)	61	1949	2010	August	Female	White	C22.0-Liver	8170/3: Hepatocellular carcinoma, NOS	Unknown	8.6.3 Carcinoma of liver and intrahepatic bile ducts	VII(b) Hepatic carcinomas	Radiography without microscopic confirm	I	T1	N0	M0	Blank(s)	Blank(s)	Blank(s)	Blank(s)	Blank(s)	Localized	0	None	None; diagnosed at autopsy	20	1	Blank(s)	Blank(s)	Blank(s)	Blank(s)	Blank(s)	Blank(s)	Blank(s)	Blank(s)	Blank(s)	Blank(s)	Blank(s)	Blank(s)	Blank(s)	988	0	98	Blank(s)	Other Infectious and Parasitic Diseases including HIV	N/A not first tumor	N/A not first tumor	6
Any Medicaid	Married (including common law)	89	1923	2013	November	Male	Other (American Indian/AK Native, Asian/Pacific Islander)	C22.0-Liver	8170/3: Hepatocellular carcinoma, NOS	Unknown	8.6.3 Carcinoma of liver and intrahepatic bile ducts	VII(b) Hepatic carcinomas	Positive histology	II	T2	N0	M0	Blank(s)	Blank(s)	Blank(s)	Blank(s)	Blank(s)	Localized	16	None	None; diagnosed at autopsy	10	999	Blank(s)	Blank(s)	Blank(s)	Blank(s)	Blank(s)	Blank(s)	Blank(s)	Blank(s)	Blank(s)	Blank(s)	Blank(s)	Blank(s)	Blank(s)	988	0	98	Blank(s)	Liver	N/A not first tumor	N/A not first tumor	13
Insured	Single (never married)	83	1928	2012	May	Male	Other (American Indian/AK Native, Asian/Pacific Islander)	C22.0-Liver	8170/3: Hepatocellular carcinoma, NOS	Unknown	8.6.3 Carcinoma of liver and intrahepatic bile ducts	VII(b) Hepatic carcinomas	Positive histology	IV	TX	N0	M1	Blank(s)	Blank(s)	Blank(s)	Blank(s)	Blank(s)	Distant	0	None	None; diagnosed at autopsy	20	999	Blank(s)	Blank(s)	Blank(s)	Blank(s)	Blank(s)	Blank(s)	Blank(s)	Blank(s)	Blank(s)	Blank(s)	Blank(s)	Blank(s)	Blank(s)	988	0	98	Blank(s)	Liver	N/A not first tumor	N/A not first tumor	0
Blank(s)	Divorced	82	1923	2005	November	Male	White	C22.0-Liver	8170/3: Hepatocellular carcinoma, NOS	Well differentiated; Grade I	8.6.3 Carcinoma of liver and intrahepatic bile ducts	VII(b) Hepatic carcinomas	Positive histology	I	T1	N0	M0	Blank(s)	Blank(s)	Blank(s)	Blank(s)	Blank(s)	Localized	16	None	None; diagnosed at autopsy	20	999	Blank(s)	Blank(s)	Blank(s)	Blank(s)	Blank(s)	Blank(s)	Blank(s)	Blank(s)	Blank(s)	Blank(s)	Blank(s)	Blank(s)	Blank(s)	988	0	98	Blank(s)	Aortic Aneurysm and Dissection	N/A not first tumor	N/A not first tumor	37
Insurance status unknown	Divorced	65	1946	2012	April	Male	Black	C22.0-Liver	8170/3: Hepatocellular carcinoma, NOS	Unknown	8.6.3 Carcinoma of liver and intrahepatic bile ducts	VII(b) Hepatic carcinomas	Unknown	UNK Stage	TX	NX	MX	Blank(s)	Blank(s)	Blank(s)	Blank(s)	Blank(s)	Unknown/unstaged	99	Unknown or not applicable	Unknown; death certificate only	999	999	Blank(s)	Blank(s)	Blank(s)	Blank(s)	Blank(s)	Blank(s)	Blank(s)	Blank(s)	Blank(s)	Blank(s)	Blank(s)	Blank(s)	Blank(s)	988	99	99	Blank(s)	Liver	N/A not first tumor	N/A not first tumor	Unknown
Insured	Single (never married)	83	1927	2011	January	Female	White	C22.0-Liver	8170/3: Hepatocellular carcinoma, NOS	Moderately differentiated; Grade II	8.6.3 Carcinoma of liver and intrahepatic bile ducts	VII(b) Hepatic carcinomas	Positive histology	II	T2	N0	M0	Blank(s)	Blank(s)	Blank(s)	Blank(s)	Blank(s)	Regional	0	None	None; diagnosed at autopsy	20	999	Blank(s)	Blank(s)	Blank(s)	Blank(s)	Blank(s)	Blank(s)	Blank(s)	Blank(s)	Blank(s)	Blank(s)	Blank(s)	Blank(s)	Blank(s)	988	0	98	Blank(s)	Alive	N/A not first tumor	N/A not first tumor	70
Blank(s)	Married (including common law)	85	1920	2006	June	Male	White	C22.1-Intrahepatic bile duct	8160/3: Cholangiocarcinoma	Unknown	8.6.3 Carcinoma of liver and intrahepatic bile ducts	VII(b) Hepatic carcinomas	Radiography without microscopic confirm	UNK Stage	T1	NX	MX	Blank(s)	Blank(s)	Blank(s)	Blank(s)	Blank(s)	Regional	0	None	None; diagnosed at autopsy	10	999	Blank(s)	Blank(s)	Blank(s)	Blank(s)	Blank(s)	Blank(s)	Blank(s)	Blank(s)	Blank(s)	Blank(s)	Blank(s)	Blank(s)	Blank(s)	988	0	98	Blank(s)	Other Biliary	N/A not first tumor	N/A not first tumor	0
Insured	Married (including common law)	65	1948	2014	March	Male	Other (American Indian/AK Native, Asian/Pacific Islander)	C22.0-Liver	8170/3: Hepatocellular carcinoma, NOS	Well differentiated; Grade I	8.6.3 Carcinoma of liver and intrahepatic bile ducts	VII(b) Hepatic carcinomas	Positive histology	I	T1	N0	M0	Blank(s)	Blank(s)	Blank(s)	Blank(s)	Blank(s)	Localized	0	None	None; diagnosed at autopsy	998	1	Blank(s)	Blank(s)	Blank(s)	Blank(s)	Blank(s)	Blank(s)	Blank(s)	Blank(s)	Blank(s)	Blank(s)	Blank(s)	Blank(s)	Blank(s)	988	0	98	Blank(s)	Alive	N/A not first tumor	N/A not first tumor	33
Insured	Married (including common law)	79	1930	2010	February	Male	Other (American Indian/AK Native, Asian/Pacific Islander)	C22.0-Liver	8170/3: Hepatocellular carcinoma, NOS	Unknown	8.6.3 Carcinoma of liver and intrahepatic bile ducts	VII(b) Hepatic carcinomas	Radiography without microscopic confirm	I	T1	N0	M0	Blank(s)	Blank(s)	Blank(s)	Blank(s)	Blank(s)	Localized	0	None	None; diagnosed at autopsy	20	999	Blank(s)	Blank(s)	Blank(s)	Blank(s)	Blank(s)	Blank(s)	Blank(s)	Blank(s)	Blank(s)	Blank(s)	Blank(s)	Blank(s)	Blank(s)	988	0	98	Blank(s)	Diseases of Heart	N/A not first tumor	N/A not first tumor	72
Insured	Widowed	86	1928	2014	October	Male	White	C22.0-Liver	8170/3: Hepatocellular carcinoma, NOS	Unknown	8.6.3 Carcinoma of liver and intrahepatic bile ducts	VII(b) Hepatic carcinomas	Positive exfoliative cytology, no positive histology	I	T1	N0	M0	Blank(s)	Blank(s)	Blank(s)	Blank(s)	Blank(s)	Localized	0	None	None; diagnosed at autopsy	10	1	Blank(s)	Blank(s)	Blank(s)	Blank(s)	Blank(s)	Blank(s)	Blank(s)	Blank(s)	Blank(s)	Blank(s)	Blank(s)	Blank(s)	Blank(s)	988	0	98	Blank(s)	Alive	N/A not first tumor	N/A not first tumor	20
Insured	Divorced	77	1932	2009	July	Male	White	C22.0-Liver	8170/3: Hepatocellular carcinoma, NOS	Unknown	8.6.3 Carcinoma of liver and intrahepatic bile ducts	VII(b) Hepatic carcinomas	Radiography without microscopic confirm	IV	T4	NX	M1	Blank(s)	Blank(s)	Blank(s)	Blank(s)	Blank(s)	Distant	0	None	None; diagnosed at autopsy	10	999	Blank(s)	Blank(s)	Blank(s)	Blank(s)	Blank(s)	Blank(s)	Blank(s)	Blank(s)	Blank(s)	Blank(s)	Blank(s)	Blank(s)	Blank(s)	988	0	98	Blank(s)	Liver	N/A not first tumor	N/A not first tumor	0
Any Medicaid	Married (including common law)	75	1935	2011	January	Male	White	C22.0-Liver	8170/3: Hepatocellular carcinoma, NOS	Unknown	8.6.3 Carcinoma of liver and intrahepatic bile ducts	VII(b) Hepatic carcinomas	Positive histology	I	T1	N0	M0	Blank(s)	Blank(s)	Blank(s)	Blank(s)	Blank(s)	Localized	0	None	None; diagnosed at autopsy	998	999	Blank(s)	Blank(s)	Blank(s)	Blank(s)	Blank(s)	Blank(s)	Blank(s)	Blank(s)	Blank(s)	Blank(s)	Blank(s)	Blank(s)	Blank(s)	988	0	98	Blank(s)	Liver	N/A not first tumor	N/A not first tumor	29
Insured	Separated	78	1933	2012	March	Male	White	C22.0-Liver	8170/3: Hepatocellular carcinoma, NOS	Unknown	8.6.3 Carcinoma of liver and intrahepatic bile ducts	VII(b) Hepatic carcinomas	Radiography without microscopic confirm	UNK Stage	T2	N0	MX	Blank(s)	Blank(s)	Blank(s)	Blank(s)	Blank(s)	Regional	0	None	None; diagnosed at autopsy	20	1	Blank(s)	Blank(s)	Blank(s)	Blank(s)	Blank(s)	Blank(s)	Blank(s)	Blank(s)	Blank(s)	Blank(s)	Blank(s)	Blank(s)	Blank(s)	988	0	98	Blank(s)	Liver	N/A not first tumor	N/A not first tumor	4
Blank(s)	Married (including common law)	67	1937	2005	March	Male	White	C22.0-Liver	8170/3: Hepatocellular carcinoma, NOS	Unknown	8.6.3 Carcinoma of liver and intrahepatic bile ducts	VII(b) Hepatic carcinomas	Positive histology	I	T1	N0	M0	Blank(s)	Blank(s)	Blank(s)	Blank(s)	Blank(s)	Localized	0	None	None; diagnosed at autopsy	10	999	Blank(s)	Blank(s)	Blank(s)	Blank(s)	Blank(s)	Blank(s)	Blank(s)	Blank(s)	Blank(s)	Blank(s)	Blank(s)	Blank(s)	Blank(s)	988	0	98	Blank(s)	Congenital Anomalies	N/A not first tumor	N/A not first tumor	20
Blank(s)	Divorced	71	1933	2004	September	Male	Black	C22.0-Liver	8170/3: Hepatocellular carcinoma, NOS	Unknown	8.6.3 Carcinoma of liver and intrahepatic bile ducts	VII(b) Hepatic carcinomas	Positive exfoliative cytology, no positive histology	IIIC	T2	N1	M0	Blank(s)	Blank(s)	Blank(s)	Blank(s)	Blank(s)	Regional	0	None	None; diagnosed at autopsy	10	999	Blank(s)	Blank(s)	Blank(s)	Blank(s)	Blank(s)	Blank(s)	Blank(s)	Blank(s)	Blank(s)	Blank(s)	Blank(s)	Blank(s)	Blank(s)	988	0	98	Blank(s)	Liver	N/A not first tumor	N/A not first tumor	3
Insured	Married (including common law)	95	1913	2009	June	Male	Other (American Indian/AK Native, Asian/Pacific Islander)	C22.0-Liver	8170/3: Hepatocellular carcinoma, NOS	Unknown	8.6.3 Carcinoma of liver and intrahepatic bile ducts	VII(b) Hepatic carcinomas	Radiography without microscopic confirm	IIIC	T1	N1	M0	Blank(s)	Blank(s)	Blank(s)	Blank(s)	Blank(s)	Regional	0	None	None; diagnosed at autopsy	20	1	Blank(s)	Blank(s)	Blank(s)	Blank(s)	Blank(s)	Blank(s)	Blank(s)	Blank(s)	Blank(s)	Blank(s)	Blank(s)	Blank(s)	Blank(s)	988	0	98	Blank(s)	Liver	N/A not first tumor	N/A not first tumor	19
Any Medicaid	Married (including common law)	84	1923	2007	January	Male	Other (American Indian/AK Native, Asian/Pacific Islander)	C22.0-Liver	8170/3: Hepatocellular carcinoma, NOS	Well differentiated; Grade I	8.6.3 Carcinoma of liver and intrahepatic bile ducts	VII(b) Hepatic carcinomas	Positive histology	I	T1	N0	M0	Blank(s)	Blank(s)	Blank(s)	Blank(s)	Blank(s)	Localized	0	None	None; diagnosed at autopsy	20	999	Blank(s)	Blank(s)	Blank(s)	Blank(s)	Blank(s)	Blank(s)	Blank(s)	Blank(s)	Blank(s)	Blank(s)	Blank(s)	Blank(s)	Blank(s)	988	0	98	Blank(s)	Liver	N/A not first tumor	N/A not first tumor	12
Blank(s)	Married (including common law)	75	1930	2005	November	Male	White	C22.0-Liver	8170/3: Hepatocellular carcinoma, NOS	Unknown	8.6.3 Carcinoma of liver and intrahepatic bile ducts	VII(b) Hepatic carcinomas	Radiography without microscopic confirm	I	T1	N0	M0	Blank(s)	Blank(s)	Blank(s)	Blank(s)	Blank(s)	Localized	0	None	None; diagnosed at autopsy	20	999	Blank(s)	Blank(s)	Blank(s)	Blank(s)	Blank(s)	Blank(s)	Blank(s)	Blank(s)	Blank(s)	Blank(s)	Blank(s)	Blank(s)	Blank(s)	988	0	98	Blank(s)	Liver	N/A not first tumor	N/A not first tumor	43
Insured	Married (including common law)	79	1929	2008	October	Male	Other (American Indian/AK Native, Asian/Pacific Islander)	C22.0-Liver	8170/3: Hepatocellular carcinoma, NOS	Moderately differentiated; Grade II	8.6.3 Carcinoma of liver and intrahepatic bile ducts	VII(b) Hepatic carcinomas	Positive exfoliative cytology, no positive histology	IV	T3	N0	M1	Blank(s)	Blank(s)	Blank(s)	Blank(s)	Blank(s)	Distant	0	None	None; diagnosed at autopsy	10	999	Blank(s)	Blank(s)	Blank(s)	Blank(s)	Blank(s)	Blank(s)	Blank(s)	Blank(s)	Blank(s)	Blank(s)	Blank(s)	Blank(s)	Blank(s)	988	0	98	Blank(s)	Liver	N/A not first tumor	N/A not first tumor	4
Blank(s)	Separated	76	1930	2006	May	Male	Black	C22.0-Liver	8170/3: Hepatocellular carcinoma, NOS	Unknown	8.6.3 Carcinoma of liver and intrahepatic bile ducts	VII(b) Hepatic carcinomas	Positive histology	I	T1	N0	M0	Blank(s)	Blank(s)	Blank(s)	Blank(s)	Blank(s)	Localized	16	None	None; diagnosed at autopsy	10	999	Blank(s)	Blank(s)	Blank(s)	Blank(s)	Blank(s)	Blank(s)	Blank(s)	Blank(s)	Blank(s)	Blank(s)	Blank(s)	Blank(s)	Blank(s)	988	0	98	Blank(s)	Alzheimers (ICD-9 and 10 only)	N/A not first tumor	N/A not first tumor	8
Insured	Married (including common law)	80	1929	2010	September	Male	White	C22.0-Liver	8170/3: Hepatocellular carcinoma, NOS	Well differentiated; Grade I	8.6.3 Carcinoma of liver and intrahepatic bile ducts	VII(b) Hepatic carcinomas	Positive histology	I	T1	N0	M0	Blank(s)	Blank(s)	Blank(s)	Blank(s)	Blank(s)	Localized	0	None	None; diagnosed at autopsy	20	999	Blank(s)	Blank(s)	Blank(s)	Blank(s)	Blank(s)	Blank(s)	Blank(s)	Blank(s)	Blank(s)	Blank(s)	Blank(s)	Blank(s)	Blank(s)	988	0	98	Blank(s)	Diseases of Heart	N/A not first tumor	N/A not first tumor	0
Insured	Single (never married)	67	1941	2008	June	Male	White	C22.0-Liver	8170/3: Hepatocellular carcinoma, NOS	Well differentiated; Grade I	8.6.3 Carcinoma of liver and intrahepatic bile ducts	VII(b) Hepatic carcinomas	Positive histology	I	T1	N0	M0	Blank(s)	Blank(s)	Blank(s)	Blank(s)	Blank(s)	Localized	61	None	None; diagnosed at autopsy	998	999	Blank(s)	Blank(s)	Blank(s)	Blank(s)	Blank(s)	Blank(s)	Blank(s)	Blank(s)	Blank(s)	Blank(s)	Blank(s)	Blank(s)	Blank(s)	988	0	98	Blank(s)	Alive	N/A not first tumor	N/A not first tumor	102
Insured	Married (including common law)	67	1943	2010	August	Male	Black	C22.1-Intrahepatic bile duct	8160/3: Cholangiocarcinoma	Poorly differentiated; Grade III	8.6.3 Carcinoma of liver and intrahepatic bile ducts	VII(b) Hepatic carcinomas	Positive histology	UNK Stage	TX	N0	M0	Blank(s)	Blank(s)	Blank(s)	Blank(s)	Blank(s)	Regional	0	None	None; diagnosed at autopsy	998	999	Blank(s)	Blank(s)	Blank(s)	Blank(s)	Blank(s)	Blank(s)	Blank(s)	Blank(s)	Blank(s)	Blank(s)	Blank(s)	Blank(s)	Blank(s)	988	0	98	Blank(s)	Intrahepatic Bile Duct	N/A not first tumor	N/A not first tumor	3
Blank(s)	Widowed	77	1927	2005	March	Female	Black	C22.0-Liver	8170/3: Hepatocellular carcinoma, NOS	Unknown	8.6.3 Carcinoma of liver and intrahepatic bile ducts	VII(b) Hepatic carcinomas	Positive histology	I	T1	N0	M0	Blank(s)	Blank(s)	Blank(s)	Blank(s)	Blank(s)	Localized	0	None	None; diagnosed at autopsy	10	999	Blank(s)	Blank(s)	Blank(s)	Blank(s)	Blank(s)	Blank(s)	Blank(s)	Blank(s)	Blank(s)	Blank(s)	Blank(s)	Blank(s)	Blank(s)	988	0	98	Blank(s)	Hypertension without Heart Disease	N/A not first tumor	N/A not first tumor	1
Any Medicaid	Married (including common law)	84	1923	2008	June	Female	Other (American Indian/AK Native, Asian/Pacific Islander)	C22.0-Liver	8170/3: Hepatocellular carcinoma, NOS	Well differentiated; Grade I	8.6.3 Carcinoma of liver and intrahepatic bile ducts	VII(b) Hepatic carcinomas	Positive histology	I	T1	N0	M0	Blank(s)	Blank(s)	Blank(s)	Blank(s)	Blank(s)	Localized	0	None	None; diagnosed at autopsy	999	999	Blank(s)	Blank(s)	Blank(s)	Blank(s)	Blank(s)	Blank(s)	Blank(s)	Blank(s)	Blank(s)	Blank(s)	Blank(s)	Blank(s)	Blank(s)	988	0	98	Blank(s)	Aortic Aneurysm and Dissection	N/A not first tumor	N/A not first tumor	71
Blank(s)	Single (never married)	68	1935	2004	June	Female	Other (American Indian/AK Native, Asian/Pacific Islander)	C22.0-Liver	8170/3: Hepatocellular carcinoma, NOS	Poorly differentiated; Grade III	8.6.3 Carcinoma of liver and intrahepatic bile ducts	VII(b) Hepatic carcinomas	Positive histology	IIIA	T3	N0	M0	Blank(s)	Blank(s)	Blank(s)	Blank(s)	Blank(s)	Localized	60	None	None; diagnosed at autopsy	10	999	Blank(s)	Blank(s)	Blank(s)	Blank(s)	Blank(s)	Blank(s)	Blank(s)	Blank(s)	Blank(s)	Blank(s)	Blank(s)	Blank(s)	Blank(s)	988	0	98	Blank(s)	Liver	N/A not first tumor	N/A not first tumor	15
Insured/No specifics	Married (including common law)	85	1924	2009	September	Male	White	C22.0-Liver	8170/3: Hepatocellular carcinoma, NOS	Well differentiated; Grade I	8.6.3 Carcinoma of liver and intrahepatic bile ducts	VII(b) Hepatic carcinomas	Positive histology	I	T1	N0	M0	Blank(s)	Blank(s)	Blank(s)	Blank(s)	Blank(s)	Localized	0	None	None; diagnosed at autopsy	998	999	Blank(s)	Blank(s)	Blank(s)	Blank(s)	Blank(s)	Blank(s)	Blank(s)	Blank(s)	Blank(s)	Blank(s)	Blank(s)	Blank(s)	Blank(s)	988	0	98	Blank(s)	Liver	N/A not first tumor	N/A not first tumor	23
Blank(s)	Married (including common law)	86	1919	2005	Blank(s)	Male	White	C22.0-Liver	8010/3: Carcinoma, NOS	Unknown	8.6.3 Carcinoma of liver and intrahepatic bile ducts	VII(b) Hepatic carcinomas	Unknown	UNK Stage	TX	NX	MX	Blank(s)	Blank(s)	Blank(s)	Blank(s)	Blank(s)	Unknown/unstaged	0	None	None; diagnosed at autopsy	999	999	Blank(s)	Blank(s)	Blank(s)	Blank(s)	Blank(s)	Blank(s)	Blank(s)	Blank(s)	Blank(s)	Blank(s)	Blank(s)	Blank(s)	Blank(s)	988	0	98	Blank(s)	Urinary Bladder	N/A not first tumor	N/A not first tumor	5
Insured/No specifics	Married (including common law)	83	1928	2011	December	Male	White	C22.0-Liver	8170/3: Hepatocellular carcinoma, NOS	Unknown	8.6.3 Carcinoma of liver and intrahepatic bile ducts	VII(b) Hepatic carcinomas	Clinical diagnosis only	I	T1	N0	M0	Blank(s)	Blank(s)	Blank(s)	Blank(s)	Blank(s)	Localized	0	None	None; diagnosed at autopsy	10	999	Blank(s)	Blank(s)	Blank(s)	Blank(s)	Blank(s)	Blank(s)	Blank(s)	Blank(s)	Blank(s)	Blank(s)	Blank(s)	Blank(s)	Blank(s)	988	0	98	Blank(s)	Liver	N/A not first tumor	N/A not first tumor	24
Insured	Widowed	61	1950	2011	December	Female	Black	C22.0-Liver	8170/3: Hepatocellular carcinoma, NOS	Unknown	8.6.3 Carcinoma of liver and intrahepatic bile ducts	VII(b) Hepatic carcinomas	Positive histology	IV	T4	N0	M1	Blank(s)	Blank(s)	Blank(s)	Blank(s)	Blank(s)	Distant	0	Unknown or not applicable	None; diagnosed at autopsy	999	999	Blank(s)	Blank(s)	Blank(s)	Blank(s)	Blank(s)	Blank(s)	Blank(s)	Blank(s)	Blank(s)	Blank(s)	Blank(s)	Blank(s)	Blank(s)	988	0	98	Blank(s)	Liver	N/A not first tumor	N/A not first tumor	2
Insured	Married (including common law)	76	1933	2010	August	Female	White	C22.1-Intrahepatic bile duct	8160/3: Cholangiocarcinoma	Poorly differentiated; Grade III	8.6.3 Carcinoma of liver and intrahepatic bile ducts	VII(b) Hepatic carcinomas	Positive histology	IV	T3	NX	M1	Blank(s)	Blank(s)	Blank(s)	Blank(s)	Blank(s)	Distant	0	None	None; diagnosed at autopsy	10	999	Blank(s)	Blank(s)	Blank(s)	Blank(s)	Blank(s)	Blank(s)	Blank(s)	Blank(s)	Blank(s)	Blank(s)	Blank(s)	Blank(s)	Blank(s)	988	0	98	Blank(s)	Intrahepatic Bile Duct	N/A not first tumor	N/A not first tumor	0
Insured	Single (never married)	81	1930	2012	January	Male	White	C22.0-Liver	8246/3: Neuroendocrine carcinoma, NOS	Unknown	8.6.3 Carcinoma of liver and intrahepatic bile ducts	VII(b) Hepatic carcinomas	Positive histology	IV	T3	N0	M1	Blank(s)	Blank(s)	Blank(s)	Blank(s)	Blank(s)	Distant	0	None	None; diagnosed at autopsy	10	999	Blank(s)	Blank(s)	Blank(s)	Blank(s)	Blank(s)	Blank(s)	Blank(s)	Blank(s)	Blank(s)	Blank(s)	Blank(s)	Blank(s)	Blank(s)	988	0	98	Blank(s)	Lung and Bronchus	N/A not first tumor	N/A not first tumor	15
Blank(s)	Divorced	60	1943	2004	September	Male	White	C22.1-Intrahepatic bile duct	8160/3: Cholangiocarcinoma	Moderately differentiated; Grade II	8.6.3 Carcinoma of liver and intrahepatic bile ducts	VII(b) Hepatic carcinomas	Positive exfoliative cytology, no positive histology	IIIC	T3	N1	M0	Blank(s)	Blank(s)	Blank(s)	Blank(s)	Blank(s)	Regional	0	None	None; diagnosed at autopsy	999	999	Blank(s)	Blank(s)	Blank(s)	Blank(s)	Blank(s)	Blank(s)	Blank(s)	Blank(s)	Blank(s)	Blank(s)	Blank(s)	Blank(s)	Blank(s)	988	0	98	Blank(s)	Intrahepatic Bile Duct	N/A not first tumor	N/A not first tumor	1
Insured	Widowed	84	1922	2007	April	Female	White	C22.0-Liver	8170/3: Hepatocellular carcinoma, NOS	Unknown	8.6.3 Carcinoma of liver and intrahepatic bile ducts	VII(b) Hepatic carcinomas	Positive histology	IV	T2	N0	M1	Blank(s)	Blank(s)	Blank(s)	Blank(s)	Blank(s)	Distant	0	None	None; diagnosed at autopsy	998	999	Blank(s)	Blank(s)	Blank(s)	Blank(s)	Blank(s)	Blank(s)	Blank(s)	Blank(s)	Blank(s)	Blank(s)	Blank(s)	Blank(s)	Blank(s)	988	0	98	Blank(s)	Miscellaneous Malignant Cancer	N/A not first tumor	N/A not first tumor	0
Insured/No specifics	Single (never married)	50	1957	2008	July	Male	Black	C22.1-Intrahepatic bile duct	8160/3: Cholangiocarcinoma	Poorly differentiated; Grade III	8.6.3 Carcinoma of liver and intrahepatic bile ducts	VII(b) Hepatic carcinomas	Positive histology	IV	T1	N0	M1	Blank(s)	Blank(s)	Blank(s)	Blank(s)	Blank(s)	Distant	0	None	None; diagnosed at autopsy	10	999	Blank(s)	Blank(s)	Blank(s)	Blank(s)	Blank(s)	Blank(s)	Blank(s)	Blank(s)	Blank(s)	Blank(s)	Blank(s)	Blank(s)	Blank(s)	988	0	98	Blank(s)	Pancreas	N/A not first tumor	N/A not first tumor	4
Blank(s)	Married (including common law)	82	1924	2006	December	Male	White	C22.1-Intrahepatic bile duct	8160/3: Cholangiocarcinoma	Unknown	8.6.3 Carcinoma of liver and intrahepatic bile ducts	VII(b) Hepatic carcinomas	Positive exfoliative cytology, no positive histology	I	T1	N0	M0	Blank(s)	Blank(s)	Blank(s)	Blank(s)	Blank(s)	Localized	0	None	None; diagnosed at autopsy	998	999	Blank(s)	Blank(s)	Blank(s)	Blank(s)	Blank(s)	Blank(s)	Blank(s)	Blank(s)	Blank(s)	Blank(s)	Blank(s)	Blank(s)	Blank(s)	988	0	98	Blank(s)	Liver	N/A not first tumor	N/A not first tumor	1
Blank(s)	Widowed	71	1935	2006	June	Female	White	C22.0-Liver	8170/3: Hepatocellular carcinoma, NOS	Well differentiated; Grade I	8.6.3 Carcinoma of liver and intrahepatic bile ducts	VII(b) Hepatic carcinomas	Positive histology	IIIA	T3	N0	M0	Blank(s)	Blank(s)	Blank(s)	Blank(s)	Blank(s)	Localized	36	None	None; diagnosed at autopsy	20	0	Blank(s)	Blank(s)	Blank(s)	Blank(s)	Blank(s)	Blank(s)	Blank(s)	Blank(s)	Blank(s)	Blank(s)	Blank(s)	Blank(s)	Blank(s)	988	0	98	Blank(s)	Alive	N/A not first tumor	N/A not first tumor	126
Insured	Widowed	64	1945	2009	April	Female	Black	C22.0-Liver	8170/3: Hepatocellular carcinoma, NOS	Unknown	8.6.3 Carcinoma of liver and intrahepatic bile ducts	VII(b) Hepatic carcinomas	Radiography without microscopic confirm	IIIA	T3	N0	M0	Blank(s)	Blank(s)	Blank(s)	Blank(s)	Blank(s)	Regional	0	None	None; diagnosed at autopsy	20	1	Blank(s)	Blank(s)	Blank(s)	Blank(s)	Blank(s)	Blank(s)	Blank(s)	Blank(s)	Blank(s)	Blank(s)	Blank(s)	Blank(s)	Blank(s)	988	0	98	Blank(s)	Alive	N/A not first tumor	N/A not first tumor	92
Insured	Widowed	82	1931	2014	March	Female	White	C22.1-Intrahepatic bile duct	8160/3: Cholangiocarcinoma	Well differentiated; Grade I	8.6.3 Carcinoma of liver and intrahepatic bile ducts	VII(b) Hepatic carcinomas	Positive histology	I	T1	N0	M0	Blank(s)	Blank(s)	Blank(s)	Blank(s)	Blank(s)	Localized	66	4 or more regional lymph nodes removed	None; diagnosed at autopsy	998	0	Blank(s)	Blank(s)	Blank(s)	Blank(s)	Blank(s)	Blank(s)	Blank(s)	Blank(s)	Blank(s)	Blank(s)	Blank(s)	Blank(s)	Blank(s)	988	5	0	Blank(s)	Alive	N/A not first tumor	N/A not first tumor	33
Blank(s)	Married (including common law)	72	1934	2006	December	Male	White	C22.0-Liver	8170/3: Hepatocellular carcinoma, NOS	Unknown	8.6.3 Carcinoma of liver and intrahepatic bile ducts	VII(b) Hepatic carcinomas	Radiography without microscopic confirm	UNK Stage	TX	N1	MX	Blank(s)	Blank(s)	Blank(s)	Blank(s)	Blank(s)	Regional	0	None	None; diagnosed at autopsy	10	999	Blank(s)	Blank(s)	Blank(s)	Blank(s)	Blank(s)	Blank(s)	Blank(s)	Blank(s)	Blank(s)	Blank(s)	Blank(s)	Blank(s)	Blank(s)	988	99	99	Blank(s)	Liver	N/A not first tumor	N/A not first tumor	2
Insured	Divorced	75	1935	2010	May	Female	Black	C22.0-Liver	8170/3: Hepatocellular carcinoma, NOS	Unknown	8.6.3 Carcinoma of liver and intrahepatic bile ducts	VII(b) Hepatic carcinomas	Radiography without microscopic confirm	I	T1	N0	M0	Blank(s)	Blank(s)	Blank(s)	Blank(s)	Blank(s)	Localized	0	None	None; diagnosed at autopsy	10	999	Blank(s)	Blank(s)	Blank(s)	Blank(s)	Blank(s)	Blank(s)	Blank(s)	Blank(s)	Blank(s)	Blank(s)	Blank(s)	Blank(s)	Blank(s)	988	0	98	Blank(s)	Liver	N/A not first tumor	N/A not first tumor	5
Any Medicaid	Divorced	54	1955	2009	February	Male	Black	C22.0-Liver	8170/3: Hepatocellular carcinoma, NOS	Unknown	8.6.3 Carcinoma of liver and intrahepatic bile ducts	VII(b) Hepatic carcinomas	Positive histology	I	T1	N0	M0	Blank(s)	Blank(s)	Blank(s)	Blank(s)	Blank(s)	Localized	0	None	None; diagnosed at autopsy	10	999	Blank(s)	Blank(s)	Blank(s)	Blank(s)	Blank(s)	Blank(s)	Blank(s)	Blank(s)	Blank(s)	Blank(s)	Blank(s)	Blank(s)	Blank(s)	988	0	98	Blank(s)	Liver	N/A not first tumor	N/A not first tumor	7
Insured	Married (including common law)	80	1933	2013	October	Male	White	C22.0-Liver	8170/3: Hepatocellular carcinoma, NOS	Unknown	8.6.3 Carcinoma of liver and intrahepatic bile ducts	VII(b) Hepatic carcinomas	Positive histology	IIIA	T3	N0	M0	Blank(s)	Blank(s)	Blank(s)	Blank(s)	Blank(s)	Regional	0	None	None; diagnosed at autopsy	998	999	Blank(s)	Blank(s)	Blank(s)	Blank(s)	Blank(s)	Blank(s)	Blank(s)	Blank(s)	Blank(s)	Blank(s)	Blank(s)	Blank(s)	Blank(s)	988	0	98	Blank(s)	Liver	N/A not first tumor	N/A not first tumor	5
Insured/No specifics	Married (including common law)	64	1949	2014	October	Male	White	C22.0-Liver	8170/3: Hepatocellular carcinoma, NOS	Moderately differentiated; Grade II	8.6.3 Carcinoma of liver and intrahepatic bile ducts	VII(b) Hepatic carcinomas	Positive histology	II	T2	N0	M0	Blank(s)	Blank(s)	Blank(s)	Blank(s)	Blank(s)	Localized	0	None	None; diagnosed at autopsy	10	1	Blank(s)	Blank(s)	Blank(s)	Blank(s)	Blank(s)	Blank(s)	Blank(s)	Blank(s)	Blank(s)	Blank(s)	Blank(s)	Blank(s)	Blank(s)	988	0	98	Blank(s)	Liver	N/A not first tumor	N/A not first tumor	6
Insured	Married (including common law)	73	1941	2014	December	Male	Other (American Indian/AK Native, Asian/Pacific Islander)	C22.0-Liver	8170/3: Hepatocellular carcinoma, NOS	Unknown	8.6.3 Carcinoma of liver and intrahepatic bile ducts	VII(b) Hepatic carcinomas	Radiography without microscopic confirm	IIIA	T3	N0	M0	Blank(s)	Blank(s)	Blank(s)	Blank(s)	Blank(s)	Regional	15	None	None; diagnosed at autopsy	20	1	Blank(s)	Blank(s)	Blank(s)	Blank(s)	Blank(s)	Blank(s)	Blank(s)	Blank(s)	Blank(s)	Blank(s)	Blank(s)	Blank(s)	Blank(s)	988	0	98	Blank(s)	Alive	N/A not first tumor	N/A not first tumor	19
Blank(s)	Married (including common law)	72	1934	2006	May	Male	Other (American Indian/AK Native, Asian/Pacific Islander)	C22.0-Liver	8170/3: Hepatocellular carcinoma, NOS	Well differentiated; Grade I	8.6.3 Carcinoma of liver and intrahepatic bile ducts	VII(b) Hepatic carcinomas	Positive histology	IIINOS	T3	NX	M0	Blank(s)	Blank(s)	Blank(s)	Blank(s)	Blank(s)	Regional	0	None	None; diagnosed at autopsy	998	999	Blank(s)	Blank(s)	Blank(s)	Blank(s)	Blank(s)	Blank(s)	Blank(s)	Blank(s)	Blank(s)	Blank(s)	Blank(s)	Blank(s)	Blank(s)	988	0	98	Blank(s)	Diseases of Heart	N/A not first tumor	N/A not first tumor	6
Blank(s)	Widowed	85	1921	2006	August	Female	White	C22.0-Liver	8170/3: Hepatocellular carcinoma, NOS	Unknown	8.6.3 Carcinoma of liver and intrahepatic bile ducts	VII(b) Hepatic carcinomas	Positive histology	I	T1	N0	M0	Blank(s)	Blank(s)	Blank(s)	Blank(s)	Blank(s)	Localized	37	None	None; diagnosed at autopsy	999	999	Blank(s)	Blank(s)	Blank(s)	Blank(s)	Blank(s)	Blank(s)	Blank(s)	Blank(s)	Blank(s)	Blank(s)	Blank(s)	Blank(s)	Blank(s)	988	0	98	Blank(s)	Liver	N/A not first tumor	N/A not first tumor	20
Insured/No specifics	Married (including common law)	67	1944	2012	March	Female	Other (American Indian/AK Native, Asian/Pacific Islander)	C22.0-Liver	8170/3: Hepatocellular carcinoma, NOS	Moderately differentiated; Grade II	8.6.3 Carcinoma of liver and intrahepatic bile ducts	VII(b) Hepatic carcinomas	Positive histology	IIIB	T4	N0	M0	Blank(s)	Blank(s)	Blank(s)	Blank(s)	Blank(s)	Regional	0	None	None; diagnosed at autopsy	998	999	Blank(s)	Blank(s)	Blank(s)	Blank(s)	Blank(s)	Blank(s)	Blank(s)	Blank(s)	Blank(s)	Blank(s)	Blank(s)	Blank(s)	Blank(s)	988	0	98	Blank(s)	Liver	N/A not first tumor	N/A not first tumor	0
Any Medicaid	Divorced	58	1952	2010	June	Female	White	C22.0-Liver	8170/3: Hepatocellular carcinoma, NOS	Moderately differentiated; Grade II	8.6.3 Carcinoma of liver and intrahepatic bile ducts	VII(b) Hepatic carcinomas	Positive histology	I	T1	N0	M0	Blank(s)	Blank(s)	Blank(s)	Blank(s)	Blank(s)	Localized	16	None	None; diagnosed at autopsy	10	999	Blank(s)	Blank(s)	Blank(s)	Blank(s)	Blank(s)	Blank(s)	Blank(s)	Blank(s)	Blank(s)	Blank(s)	Blank(s)	Blank(s)	Blank(s)	988	0	98	Blank(s)	Liver	N/A not first tumor	N/A not first tumor	48
Blank(s)	Widowed	86	1918	2005	June	Female	White	C22.1-Intrahepatic bile duct	8160/3: Cholangiocarcinoma	Unknown	8.6.3 Carcinoma of liver and intrahepatic bile ducts	VII(b) Hepatic carcinomas	Positive histology	IV	TX	N0	M1	Blank(s)	Blank(s)	Blank(s)	Blank(s)	Blank(s)	Distant	0	4 or more regional lymph nodes removed	Non-primary surgical procedure performed	999	999	Blank(s)	Blank(s)	Blank(s)	Blank(s)	Blank(s)	Blank(s)	Blank(s)	Blank(s)	Blank(s)	Blank(s)	Blank(s)	Blank(s)	Blank(s)	988	7	0	Blank(s)	Liver	N/A not first tumor	N/A not first tumor	52
Blank(s)	Widowed	81	1922	2004	December	Female	White	C22.1-Intrahepatic bile duct	8160/3: Cholangiocarcinoma	Unknown	8.6.3 Carcinoma of liver and intrahepatic bile ducts	VII(b) Hepatic carcinomas	Positive exfoliative cytology, no positive histology	IV	T1	N0	M1	Blank(s)	Blank(s)	Blank(s)	Blank(s)	Blank(s)	Distant	0	None	None; diagnosed at autopsy	999	999	Blank(s)	Blank(s)	Blank(s)	Blank(s)	Blank(s)	Blank(s)	Blank(s)	Blank(s)	Blank(s)	Blank(s)	Blank(s)	Blank(s)	Blank(s)	988	0	98	Blank(s)	Intrahepatic Bile Duct	N/A not first tumor	N/A not first tumor	15
Insured	Married (including common law)	65	1943	2009	June	Female	White	C22.1-Intrahepatic bile duct	8160/3: Cholangiocarcinoma	Unknown	8.6.3 Carcinoma of liver and intrahepatic bile ducts	VII(b) Hepatic carcinomas	Positive histology	I	T1	N0	M0	Blank(s)	Blank(s)	Blank(s)	Blank(s)	Blank(s)	Localized	0	None	None; diagnosed at autopsy	999	999	Blank(s)	Blank(s)	Blank(s)	Blank(s)	Blank(s)	Blank(s)	Blank(s)	Blank(s)	Blank(s)	Blank(s)	Blank(s)	Blank(s)	Blank(s)	988	0	98	Blank(s)	Intrahepatic Bile Duct	N/A not first tumor	N/A not first tumor	34
Any Medicaid	Single (never married)	86	1921	2008	February	Male	Black	C22.0-Liver	8170/3: Hepatocellular carcinoma, NOS	Unknown	8.6.3 Carcinoma of liver and intrahepatic bile ducts	VII(b) Hepatic carcinomas	Radiography without microscopic confirm	IIIA	T3	N0	M0	Blank(s)	Blank(s)	Blank(s)	Blank(s)	Blank(s)	Regional	0	None	None; diagnosed at autopsy	999	999	Blank(s)	Blank(s)	Blank(s)	Blank(s)	Blank(s)	Blank(s)	Blank(s)	Blank(s)	Blank(s)	Blank(s)	Blank(s)	Blank(s)	Blank(s)	988	0	98	Blank(s)	Liver	N/A not first tumor	N/A not first tumor	14
Insured	Married (including common law)	86	1927	2013	September	Male	White	C22.0-Liver	8170/3: Hepatocellular carcinoma, NOS	Moderately differentiated; Grade II	8.6.3 Carcinoma of liver and intrahepatic bile ducts	VII(b) Hepatic carcinomas	Positive histology	IIIA	T3	N0	M0	Blank(s)	Blank(s)	Blank(s)	Blank(s)	Blank(s)	Localized	26	None	None; diagnosed at autopsy	10	0	Blank(s)	Blank(s)	Blank(s)	Blank(s)	Blank(s)	Blank(s)	Blank(s)	Blank(s)	Blank(s)	Blank(s)	Blank(s)	Blank(s)	Blank(s)	988	0	98	Blank(s)	Miscellaneous Malignant Cancer	N/A not first tumor	N/A not first tumor	9
Blank(s)	Divorced	68	1937	2005	October	Male	White	C22.0-Liver	8170/3: Hepatocellular carcinoma, NOS	Well differentiated; Grade I	8.6.3 Carcinoma of liver and intrahepatic bile ducts	VII(b) Hepatic carcinomas	Positive histology	IIIA	T3	N0	M0	Blank(s)	Blank(s)	Blank(s)	Blank(s)	Blank(s)	Localized	0	None	None; diagnosed at autopsy	10	999	Blank(s)	Blank(s)	Blank(s)	Blank(s)	Blank(s)	Blank(s)	Blank(s)	Blank(s)	Blank(s)	Blank(s)	Blank(s)	Blank(s)	Blank(s)	988	0	98	Blank(s)	Chronic Obstructive Pulmonary Disease and Allied Cond	N/A not first tumor	N/A not first tumor	1
Insured	Single (never married)	59	1949	2009	March	Male	White	C22.0-Liver	8170/3: Hepatocellular carcinoma, NOS	Unknown	8.6.3 Carcinoma of liver and intrahepatic bile ducts	VII(b) Hepatic carcinomas	Positive laboratory test/marker study	I	T1	N0	M0	Blank(s)	Blank(s)	Blank(s)	Blank(s)	Blank(s)	Localized	0	None	None; diagnosed at autopsy	10	999	Blank(s)	Blank(s)	Blank(s)	Blank(s)	Blank(s)	Blank(s)	Blank(s)	Blank(s)	Blank(s)	Blank(s)	Blank(s)	Blank(s)	Blank(s)	988	0	98	Blank(s)	Chronic Liver Disease and Cirrhosis	N/A not first tumor	N/A not first tumor	0
Insured	Married (including common law)	66	1942	2008	June	Female	Other (American Indian/AK Native, Asian/Pacific Islander)	C22.1-Intrahepatic bile duct	8160/3: Cholangiocarcinoma	Unknown	8.6.3 Carcinoma of liver and intrahepatic bile ducts	VII(b) Hepatic carcinomas	Positive histology	IIIA	T3	N0	M0	Blank(s)	Blank(s)	Blank(s)	Blank(s)	Blank(s)	Regional	0	None	None; diagnosed at autopsy	998	999	Blank(s)	Blank(s)	Blank(s)	Blank(s)	Blank(s)	Blank(s)	Blank(s)	Blank(s)	Blank(s)	Blank(s)	Blank(s)	Blank(s)	Blank(s)	988	0	98	Blank(s)	Intrahepatic Bile Duct	N/A not first tumor	N/A not first tumor	20
Any Medicaid	Single (never married)	73	1936	2009	November	Female	White	C22.0-Liver	8170/3: Hepatocellular carcinoma, NOS	Unknown	8.6.3 Carcinoma of liver and intrahepatic bile ducts	VII(b) Hepatic carcinomas	Positive histology	I	T1	N0	M0	Blank(s)	Blank(s)	Blank(s)	Blank(s)	Blank(s)	Localized	0	None	None; diagnosed at autopsy	10	1	Blank(s)	Blank(s)	Blank(s)	Blank(s)	Blank(s)	Blank(s)	Blank(s)	Blank(s)	Blank(s)	Blank(s)	Blank(s)	Blank(s)	Blank(s)	988	0	98	Blank(s)	Other Infectious and Parasitic Diseases including HIV	N/A not first tumor	N/A not first tumor	53
Insured	Married (including common law)	72	1934	2007	September	Female	White	C22.1-Intrahepatic bile duct	8160/3: Cholangiocarcinoma	Unknown	8.6.3 Carcinoma of liver and intrahepatic bile ducts	VII(b) Hepatic carcinomas	Positive histology	IV	T3	N0	M1	Blank(s)	Blank(s)	Blank(s)	Blank(s)	Blank(s)	Distant	0	None	None; diagnosed at autopsy	20	999	Blank(s)	Blank(s)	Blank(s)	Blank(s)	Blank(s)	Blank(s)	Blank(s)	Blank(s)	Blank(s)	Blank(s)	Blank(s)	Blank(s)	Blank(s)	988	0	98	Blank(s)	Intrahepatic Bile Duct	N/A not first tumor	N/A not first tumor	0
Insured/No specifics	Divorced	68	1944	2013	January	Female	White	C22.1-Intrahepatic bile duct	8160/3: Cholangiocarcinoma	Moderately differentiated; Grade II	8.6.3 Carcinoma of liver and intrahepatic bile ducts	VII(b) Hepatic carcinomas	Positive histology	I	T1	N0	M0	Blank(s)	Blank(s)	Blank(s)	Blank(s)	Blank(s)	Regional	36	None	None; diagnosed at autopsy	999	999	Blank(s)	Blank(s)	Blank(s)	Blank(s)	Blank(s)	Blank(s)	Blank(s)	Blank(s)	Blank(s)	Blank(s)	Blank(s)	Blank(s)	Blank(s)	988	0	98	Blank(s)	Alive	N/A not first tumor	N/A not first tumor	46
Blank(s)	Widowed	82	1923	2005	August	Female	Other (American Indian/AK Native, Asian/Pacific Islander)	C22.0-Liver	8170/3: Hepatocellular carcinoma, NOS	Poorly differentiated; Grade III	8.6.3 Carcinoma of liver and intrahepatic bile ducts	VII(b) Hepatic carcinomas	Positive histology	II	T2	N0	M0	Blank(s)	Blank(s)	Blank(s)	Blank(s)	Blank(s)	Regional	0	None	None; diagnosed at autopsy	10	999	Blank(s)	Blank(s)	Blank(s)	Blank(s)	Blank(s)	Blank(s)	Blank(s)	Blank(s)	Blank(s)	Blank(s)	Blank(s)	Blank(s)	Blank(s)	988	0	98	Blank(s)	Liver	N/A not first tumor	N/A not first tumor	7
Insured	Widowed	67	1944	2012	January	Male	White	C22.0-Liver	8170/3: Hepatocellular carcinoma, NOS	Moderately differentiated; Grade II	8.6.3 Carcinoma of liver and intrahepatic bile ducts	VII(b) Hepatic carcinomas	Positive histology	I	T1	N0	M0	Blank(s)	Blank(s)	Blank(s)	Blank(s)	Blank(s)	Localized	0	None	None; diagnosed at autopsy	20	999	Blank(s)	Blank(s)	Blank(s)	Blank(s)	Blank(s)	Blank(s)	Blank(s)	Blank(s)	Blank(s)	Blank(s)	Blank(s)	Blank(s)	Blank(s)	988	0	98	Blank(s)	Liver	N/A not first tumor	N/A not first tumor	13
Blank(s)	Widowed	73	1933	2006	October	Male	Other (American Indian/AK Native, Asian/Pacific Islander)	C22.0-Liver	8170/3: Hepatocellular carcinoma, NOS	Unknown	8.6.3 Carcinoma of liver and intrahepatic bile ducts	VII(b) Hepatic carcinomas	Positive histology	I	T1	N0	M0	Blank(s)	Blank(s)	Blank(s)	Blank(s)	Blank(s)	Localized	0	None	None; diagnosed at autopsy	10	999	Blank(s)	Blank(s)	Blank(s)	Blank(s)	Blank(s)	Blank(s)	Blank(s)	Blank(s)	Blank(s)	Blank(s)	Blank(s)	Blank(s)	Blank(s)	988	0	98	Blank(s)	Liver	N/A not first tumor	N/A not first tumor	5
Any Medicaid	Single (never married)	52	1955	2007	August	Male	White	C22.0-Liver	8170/3: Hepatocellular carcinoma, NOS	Moderately differentiated; Grade II	8.6.3 Carcinoma of liver and intrahepatic bile ducts	VII(b) Hepatic carcinomas	Positive histology	II	T2	N0	M0	Blank(s)	Blank(s)	Blank(s)	Blank(s)	Blank(s)	Localized	16	None	None; diagnosed at autopsy	10	1	Blank(s)	Blank(s)	Blank(s)	Blank(s)	Blank(s)	Blank(s)	Blank(s)	Blank(s)	Blank(s)	Blank(s)	Blank(s)	Blank(s)	Blank(s)	988	0	98	Blank(s)	Other Infectious and Parasitic Diseases including HIV	N/A not first tumor	N/A not first tumor	111
Insured	Married (including common law)	81	1931	2012	March	Female	White	C22.1-Intrahepatic bile duct	8160/3: Cholangiocarcinoma	Unknown	8.6.3 Carcinoma of liver and intrahepatic bile ducts	VII(b) Hepatic carcinomas	Positive exfoliative cytology, no positive histology	IV	T3	N1	M1	Blank(s)	Blank(s)	Blank(s)	Blank(s)	Blank(s)	Distant	0	None	None; diagnosed at autopsy	999	999	Blank(s)	Blank(s)	Blank(s)	Blank(s)	Blank(s)	Blank(s)	Blank(s)	Blank(s)	Blank(s)	Blank(s)	Blank(s)	Blank(s)	Blank(s)	988	0	98	Blank(s)	Intrahepatic Bile Duct	N/A not first tumor	N/A not first tumor	8
Insured	Unknown	67	1945	2012	September	Female	Other (American Indian/AK Native, Asian/Pacific Islander)	C22.1-Intrahepatic bile duct	8160/3: Cholangiocarcinoma	Moderately differentiated; Grade II	8.6.3 Carcinoma of liver and intrahepatic bile ducts	VII(b) Hepatic carcinomas	Positive histology	I	T1	N0	M0	Blank(s)	Blank(s)	Blank(s)	Blank(s)	Blank(s)	Localized	16	None	None; diagnosed at autopsy	20	0	Blank(s)	Blank(s)	Blank(s)	Blank(s)	Blank(s)	Blank(s)	Blank(s)	Blank(s)	Blank(s)	Blank(s)	Blank(s)	Blank(s)	Blank(s)	988	0	98	Blank(s)	Accidents and Adverse Effects	N/A not first tumor	N/A not first tumor	32
Blank(s)	Widowed	87	1919	2006	August	Female	Other (American Indian/AK Native, Asian/Pacific Islander)	C22.0-Liver	8170/3: Hepatocellular carcinoma, NOS	Unknown	8.6.3 Carcinoma of liver and intrahepatic bile ducts	VII(b) Hepatic carcinomas	Radiography without microscopic confirm	IV	T1	NX	M1	Blank(s)	Blank(s)	Blank(s)	Blank(s)	Blank(s)	Distant	0	None	None; diagnosed at autopsy	10	999	Blank(s)	Blank(s)	Blank(s)	Blank(s)	Blank(s)	Blank(s)	Blank(s)	Blank(s)	Blank(s)	Blank(s)	Blank(s)	Blank(s)	Blank(s)	988	0	98	Blank(s)	Miscellaneous Malignant Cancer	N/A not first tumor	N/A not first tumor	1
Insured	Married (including common law)	71	1941	2013	February	Female	White	C22.1-Intrahepatic bile duct	8160/3: Cholangiocarcinoma	Unknown	8.6.3 Carcinoma of liver and intrahepatic bile ducts	VII(b) Hepatic carcinomas	Positive histology	IV	T1	N0	M1	Blank(s)	Blank(s)	Blank(s)	Blank(s)	Blank(s)	Distant	0	None	None; diagnosed at autopsy	998	999	Blank(s)	Blank(s)	Blank(s)	Blank(s)	Blank(s)	Blank(s)	Blank(s)	Blank(s)	Blank(s)	Blank(s)	Blank(s)	Blank(s)	Blank(s)	988	0	98	Blank(s)	Intrahepatic Bile Duct	N/A not first tumor	N/A not first tumor	34
Blank(s)	Divorced	81	1923	2005	February	Female	Black	C22.0-Liver	8170/3: Hepatocellular carcinoma, NOS	Unknown	8.6.3 Carcinoma of liver and intrahepatic bile ducts	VII(b) Hepatic carcinomas	Positive laboratory test/marker study	IIIB	T4	N0	M0	Blank(s)	Blank(s)	Blank(s)	Blank(s)	Blank(s)	Distant	0	None	None; diagnosed at autopsy	10	999	Blank(s)	Blank(s)	Blank(s)	Blank(s)	Blank(s)	Blank(s)	Blank(s)	Blank(s)	Blank(s)	Blank(s)	Blank(s)	Blank(s)	Blank(s)	988	0	98	Blank(s)	Liver	N/A not first tumor	N/A not first tumor	0
Insured	Married (including common law)	58	1951	2010	February	Male	Other (American Indian/AK Native, Asian/Pacific Islander)	C22.0-Liver	8170/3: Hepatocellular carcinoma, NOS	Unknown	8.6.3 Carcinoma of liver and intrahepatic bile ducts	VII(b) Hepatic carcinomas	Positive laboratory test/marker study	II	T2	N0	M0	Blank(s)	Blank(s)	Blank(s)	Blank(s)	Blank(s)	Regional	0	None	None; diagnosed at autopsy	10	1	Blank(s)	Blank(s)	Blank(s)	Blank(s)	Blank(s)	Blank(s)	Blank(s)	Blank(s)	Blank(s)	Blank(s)	Blank(s)	Blank(s)	Blank(s)	988	0	98	Blank(s)	Liver	N/A not first tumor	N/A not first tumor	15
Insured	Married (including common law)	47	1963	2011	January	Female	White	C22.1-Intrahepatic bile duct	8162/3: Klatskin tumor	Unknown	8.6.3 Carcinoma of liver and intrahepatic bile ducts	VII(b) Hepatic carcinomas	Positive histology	IIIC	T1	N1	M0	Blank(s)	Blank(s)	Blank(s)	Blank(s)	Blank(s)	Regional	0	None	Non-primary surgical procedure performed	10	999	Blank(s)	Blank(s)	Blank(s)	Blank(s)	Blank(s)	Blank(s)	Blank(s)	Blank(s)	Blank(s)	Blank(s)	Blank(s)	Blank(s)	Blank(s)	988	1	1	Blank(s)	Intrahepatic Bile Duct	N/A not first tumor	N/A not first tumor	10
Insured	Widowed	86	1920	2007	September	Female	White	C22.1-Intrahepatic bile duct	8160/3: Cholangiocarcinoma	Unknown	8.6.3 Carcinoma of liver and intrahepatic bile ducts	VII(b) Hepatic carcinomas	Positive histology	IIIC	T1	N1	M0	Blank(s)	Blank(s)	Blank(s)	Blank(s)	Blank(s)	Regional	0	1 to 3 regional lymph nodes removed	Non-primary surgical procedure to other regional sites	999	999	Blank(s)	Blank(s)	Blank(s)	Blank(s)	Blank(s)	Blank(s)	Blank(s)	Blank(s)	Blank(s)	Blank(s)	Blank(s)	Blank(s)	Blank(s)	988	3	1	Blank(s)	Gallbladder	N/A not first tumor	N/A not first tumor	2
Insured	Married (including common law)	73	1933	2007	October	Male	White	C22.1-Intrahepatic bile duct	8140/3: Adenocarcinoma, NOS	Moderately differentiated; Grade II	8.6.3 Carcinoma of liver and intrahepatic bile ducts	VII(b) Hepatic carcinomas	Positive histology	I	T1	N0	M0	Blank(s)	Blank(s)	Blank(s)	Blank(s)	Blank(s)	Regional	21	None	Non-primary surgical procedure to other regional sites	999	999	Blank(s)	Blank(s)	Blank(s)	Blank(s)	Blank(s)	Blank(s)	Blank(s)	Blank(s)	Blank(s)	Blank(s)	Blank(s)	Blank(s)	Blank(s)	988	0	98	Blank(s)	Gallbladder	N/A not first tumor	N/A not first tumor	12
Blank(s)	Single (never married)	56	1948	2005	January	Male	White	C22.0-Liver	8170/3: Hepatocellular carcinoma, NOS	Well differentiated; Grade I	8.6.3 Carcinoma of liver and intrahepatic bile ducts	VII(b) Hepatic carcinomas	Positive histology	II	T2	N0	M0	Blank(s)	Blank(s)	Blank(s)	Blank(s)	Blank(s)	Localized	61	1 to 3 regional lymph nodes removed	None; diagnosed at autopsy	999	999	Blank(s)	Blank(s)	Blank(s)	Blank(s)	Blank(s)	Blank(s)	Blank(s)	Blank(s)	Blank(s)	Blank(s)	Blank(s)	Blank(s)	Blank(s)	988	1	0	Blank(s)	Kidney and Renal Pelvis	N/A not first tumor	N/A not first tumor	117
Blank(s)	Married (including common law)	63	1940	2004	January	Male	Black	C22.0-Liver	8170/3: Hepatocellular carcinoma, NOS	Moderately differentiated; Grade II	8.6.3 Carcinoma of liver and intrahepatic bile ducts	VII(b) Hepatic carcinomas	Positive histology	II	T2	N0	M0	Blank(s)	Blank(s)	Blank(s)	Blank(s)	Blank(s)	Localized	21	None	None; diagnosed at autopsy	10	999	Blank(s)	Blank(s)	Blank(s)	Blank(s)	Blank(s)	Blank(s)	Blank(s)	Blank(s)	Blank(s)	Blank(s)	Blank(s)	Blank(s)	Blank(s)	988	0	98	Blank(s)	Liver	N/A not first tumor	N/A not first tumor	8
Blank(s)	Married (including common law)	83	1921	2004	December	Male	Other (American Indian/AK Native, Asian/Pacific Islander)	C22.0-Liver	8170/3: Hepatocellular carcinoma, NOS	Unknown	8.6.3 Carcinoma of liver and intrahepatic bile ducts	VII(b) Hepatic carcinomas	Positive histology	IIIA	T3	N0	M0	Blank(s)	Blank(s)	Blank(s)	Blank(s)	Blank(s)	Localized	0	None	None; diagnosed at autopsy	998	999	Blank(s)	Blank(s)	Blank(s)	Blank(s)	Blank(s)	Blank(s)	Blank(s)	Blank(s)	Blank(s)	Blank(s)	Blank(s)	Blank(s)	Blank(s)	988	0	98	Blank(s)	Liver	N/A not first tumor	N/A not first tumor	9
Insured	Married (including common law)	77	1934	2012	March	Male	White	C22.0-Liver	8170/3: Hepatocellular carcinoma, NOS	Unknown	8.6.3 Carcinoma of liver and intrahepatic bile ducts	VII(b) Hepatic carcinomas	Clinical diagnosis only	UNK Stage	TX	N0	M0	Blank(s)	Blank(s)	Blank(s)	Blank(s)	Blank(s)	Unknown/unstaged	0	None	None; diagnosed at autopsy	998	1	Blank(s)	Blank(s)	Blank(s)	Blank(s)	Blank(s)	Blank(s)	Blank(s)	Blank(s)	Blank(s)	Blank(s)	Blank(s)	Blank(s)	Blank(s)	988	0	98	Blank(s)	Liver	N/A not first tumor	N/A not first tumor	0
Blank(s)	Married (including common law)	68	1937	2005	July	Male	White	C22.0-Liver	8170/3: Hepatocellular carcinoma, NOS	Unknown	8.6.3 Carcinoma of liver and intrahepatic bile ducts	VII(b) Hepatic carcinomas	Positive histology	UNK Stage	TX	N0	M0	Blank(s)	Blank(s)	Blank(s)	Blank(s)	Blank(s)	Regional	0	None	None; diagnosed at autopsy	999	999	Blank(s)	Blank(s)	Blank(s)	Blank(s)	Blank(s)	Blank(s)	Blank(s)	Blank(s)	Blank(s)	Blank(s)	Blank(s)	Blank(s)	Blank(s)	988	0	98	Blank(s)	Liver	N/A not first tumor	N/A not first tumor	6
Blank(s)	Single (never married)	83	1921	2005	July	Male	White	C22.0-Liver	8170/3: Hepatocellular carcinoma, NOS	Unknown	8.6.3 Carcinoma of liver and intrahepatic bile ducts	VII(b) Hepatic carcinomas	Positive histology	I	T1	N0	M0	Blank(s)	Blank(s)	Blank(s)	Blank(s)	Blank(s)	Localized	0	None	None; diagnosed at autopsy	998	999	Blank(s)	Blank(s)	Blank(s)	Blank(s)	Blank(s)	Blank(s)	Blank(s)	Blank(s)	Blank(s)	Blank(s)	Blank(s)	Blank(s)	Blank(s)	988	0	98	Blank(s)	Nephritis, Nephrotic Syndrome and Nephrosis	N/A not first tumor	N/A not first tumor	0
Any Medicaid	Single (never married)	57	1953	2011	April	Male	White	C22.0-Liver	8170/3: Hepatocellular carcinoma, NOS	Unknown	8.6.3 Carcinoma of liver and intrahepatic bile ducts	VII(b) Hepatic carcinomas	Unknown	UNK Stage	TX	NX	MX	Blank(s)	Blank(s)	Blank(s)	Blank(s)	Blank(s)	Unknown/unstaged	0	None	None; diagnosed at autopsy	999	999	Blank(s)	Blank(s)	Blank(s)	Blank(s)	Blank(s)	Blank(s)	Blank(s)	Blank(s)	Blank(s)	Blank(s)	Blank(s)	Blank(s)	Blank(s)	988	0	98	Blank(s)	Other Infectious and Parasitic Diseases including HIV	N/A not first tumor	N/A not first tumor	3
Insured	Married (including common law)	60	1947	2008	March	Male	Black	C22.0-Liver	8170/3: Hepatocellular carcinoma, NOS	Well differentiated; Grade I	8.6.3 Carcinoma of liver and intrahepatic bile ducts	VII(b) Hepatic carcinomas	Positive histology	II	T2	N0	M0	Blank(s)	Blank(s)	Blank(s)	Blank(s)	Blank(s)	Regional	0	None	None; diagnosed at autopsy	20	999	Blank(s)	Blank(s)	Blank(s)	Blank(s)	Blank(s)	Blank(s)	Blank(s)	Blank(s)	Blank(s)	Blank(s)	Blank(s)	Blank(s)	Blank(s)	988	0	98	Blank(s)	Liver	N/A not first tumor	N/A not first tumor	69
Insured	Single (never married)	73	1940	2014	March	Male	Black	C22.0-Liver	8170/3: Hepatocellular carcinoma, NOS	Unknown	8.6.3 Carcinoma of liver and intrahepatic bile ducts	VII(b) Hepatic carcinomas	Positive histology	I	T1	N0	M0	Blank(s)	Blank(s)	Blank(s)	Blank(s)	Blank(s)	Localized	0	None	None; diagnosed at autopsy	20	999	Blank(s)	Blank(s)	Blank(s)	Blank(s)	Blank(s)	Blank(s)	Blank(s)	Blank(s)	Blank(s)	Blank(s)	Blank(s)	Blank(s)	Blank(s)	988	0	98	Blank(s)	Alive	N/A not first tumor	N/A not first tumor	31
Insured	Married (including common law)	68	1940	2008	September	Male	White	C22.0-Liver	8170/3: Hepatocellular carcinoma, NOS	Well differentiated; Grade I	8.6.3 Carcinoma of liver and intrahepatic bile ducts	VII(b) Hepatic carcinomas	Positive histology	UNK Stage	TX	N0	M0	Blank(s)	Blank(s)	Blank(s)	Blank(s)	Blank(s)	Unknown/unstaged	0	None	None; diagnosed at autopsy	20	999	Blank(s)	Blank(s)	Blank(s)	Blank(s)	Blank(s)	Blank(s)	Blank(s)	Blank(s)	Blank(s)	Blank(s)	Blank(s)	Blank(s)	Blank(s)	988	0	98	Blank(s)	Liver	N/A not first tumor	N/A not first tumor	33
Insured/No specifics	Divorced	72	1941	2014	July	Male	White	C22.0-Liver	8170/3: Hepatocellular carcinoma, NOS	Unknown	8.6.3 Carcinoma of liver and intrahepatic bile ducts	VII(b) Hepatic carcinomas	Radiography without microscopic confirm	UNK Stage	TX	NX	MX	Blank(s)	Blank(s)	Blank(s)	Blank(s)	Blank(s)	Unknown/unstaged	0	None	None; diagnosed at autopsy	20	999	Blank(s)	Blank(s)	Blank(s)	Blank(s)	Blank(s)	Blank(s)	Blank(s)	Blank(s)	Blank(s)	Blank(s)	Blank(s)	Blank(s)	Blank(s)	988	0	98	Blank(s)	Prostate	N/A not first tumor	N/A not first tumor	17
Any Medicaid	Widowed	82	1925	2007	July	Female	Other (American Indian/AK Native, Asian/Pacific Islander)	C22.1-Intrahepatic bile duct	8000/3: Neoplasm, malignant	Unknown	10 Unspecified Malignant Neoplasms	VII(c) Unspecified malignant hepatic tumors	Radiography without microscopic confirm	IV	TX	NX	M1	Blank(s)	Blank(s)	Blank(s)	Blank(s)	Blank(s)	Distant	0	Unknown or not applicable	None; diagnosed at autopsy	999	999	Blank(s)	Blank(s)	Blank(s)	Blank(s)	Blank(s)	Blank(s)	Blank(s)	Blank(s)	Blank(s)	Blank(s)	Blank(s)	Blank(s)	Blank(s)	988	99	99	Blank(s)	Intrahepatic Bile Duct	N/A not first tumor	N/A not first tumor	0
Blank(s)	Married (including common law)	78	1926	2005	April	Male	White	C22.0-Liver	8170/3: Hepatocellular carcinoma, NOS	Poorly differentiated; Grade III	8.6.3 Carcinoma of liver and intrahepatic bile ducts	VII(b) Hepatic carcinomas	Positive histology	IIIB	T4	N0	M0	Blank(s)	Blank(s)	Blank(s)	Blank(s)	Blank(s)	Regional	0	None	Non-primary surgical procedure to other regional sites	998	0	Blank(s)	Blank(s)	Blank(s)	Blank(s)	Blank(s)	Blank(s)	Blank(s)	Blank(s)	Blank(s)	Blank(s)	Blank(s)	Blank(s)	Blank(s)	988	0	98	Blank(s)	Liver	N/A not first tumor	N/A not first tumor	9
Insured	Unknown	82	1929	2011	October	Female	Other (American Indian/AK Native, Asian/Pacific Islander)	C22.1-Intrahepatic bile duct	8160/3: Cholangiocarcinoma	Unknown	8.6.3 Carcinoma of liver and intrahepatic bile ducts	VII(b) Hepatic carcinomas	Clinical diagnosis only	II	T2	N0	M0	Blank(s)	Blank(s)	Blank(s)	Blank(s)	Blank(s)	Localized	0	None	None; diagnosed at autopsy	998	999	Blank(s)	Blank(s)	Blank(s)	Blank(s)	Blank(s)	Blank(s)	Blank(s)	Blank(s)	Blank(s)	Blank(s)	Blank(s)	Blank(s)	Blank(s)	988	0	98	Blank(s)	Intrahepatic Bile Duct	N/A not first tumor	N/A not first tumor	12
Insured	Married (including common law)	64	1948	2012	October	Male	White	C22.1-Intrahepatic bile duct	8160/3: Cholangiocarcinoma	Unknown	8.6.3 Carcinoma of liver and intrahepatic bile ducts	VII(b) Hepatic carcinomas	Positive histology	I	T1	N0	M0	Blank(s)	Blank(s)	Blank(s)	Blank(s)	Blank(s)	Localized	0	None	None; diagnosed at autopsy	999	999	Blank(s)	Blank(s)	Blank(s)	Blank(s)	Blank(s)	Blank(s)	Blank(s)	Blank(s)	Blank(s)	Blank(s)	Blank(s)	Blank(s)	Blank(s)	988	0	98	Blank(s)	Intrahepatic Bile Duct	N/A not first tumor	N/A not first tumor	2
Insured/No specifics	Married (including common law)	73	1939	2012	December	Male	White	C22.1-Intrahepatic bile duct	8160/3: Cholangiocarcinoma	Unknown	8.6.3 Carcinoma of liver and intrahepatic bile ducts	VII(b) Hepatic carcinomas	Radiography without microscopic confirm	IV	T1	N1	M1	Blank(s)	Blank(s)	Blank(s)	Blank(s)	Blank(s)	Distant	0	None	None; diagnosed at autopsy	20	999	Blank(s)	Blank(s)	Blank(s)	Blank(s)	Blank(s)	Blank(s)	Blank(s)	Blank(s)	Blank(s)	Blank(s)	Blank(s)	Blank(s)	Blank(s)	988	0	98	Blank(s)	Intrahepatic Bile Duct	N/A not first tumor	N/A not first tumor	7
Blank(s)	Married (including common law)	84	1922	2006	October	Male	White	C22.0-Liver	8170/3: Hepatocellular carcinoma, NOS	Unknown	8.6.3 Carcinoma of liver and intrahepatic bile ducts	VII(b) Hepatic carcinomas	Radiography without microscopic confirm	IV	T1	N0	M1	Blank(s)	Blank(s)	Blank(s)	Blank(s)	Blank(s)	Distant	0	None	None; diagnosed at autopsy	998	999	Blank(s)	Blank(s)	Blank(s)	Blank(s)	Blank(s)	Blank(s)	Blank(s)	Blank(s)	Blank(s)	Blank(s)	Blank(s)	Blank(s)	Blank(s)	988	0	98	Blank(s)	Liver	N/A not first tumor	N/A not first tumor	0
Blank(s)	Divorced	85	1920	2005	December	Male	Black	C22.1-Intrahepatic bile duct	8160/3: Cholangiocarcinoma	Unknown	8.6.3 Carcinoma of liver and intrahepatic bile ducts	VII(b) Hepatic carcinomas	Positive exfoliative cytology, no positive histology	IV	T3	N1	M1	Blank(s)	Blank(s)	Blank(s)	Blank(s)	Blank(s)	Distant	0	None	None; diagnosed at autopsy	10	999	Blank(s)	Blank(s)	Blank(s)	Blank(s)	Blank(s)	Blank(s)	Blank(s)	Blank(s)	Blank(s)	Blank(s)	Blank(s)	Blank(s)	Blank(s)	988	0	98	Blank(s)	Intrahepatic Bile Duct	N/A not first tumor	N/A not first tumor	0
Blank(s)	Married (including common law)	84	1920	2004	July	Male	White	C22.0-Liver	8170/3: Hepatocellular carcinoma, NOS	Well differentiated; Grade I	8.6.3 Carcinoma of liver and intrahepatic bile ducts	VII(b) Hepatic carcinomas	Positive histology	IV	T2	NX	M1	Blank(s)	Blank(s)	Blank(s)	Blank(s)	Blank(s)	Distant	0	None	None; diagnosed at autopsy	10	999	Blank(s)	Blank(s)	Blank(s)	Blank(s)	Blank(s)	Blank(s)	Blank(s)	Blank(s)	Blank(s)	Blank(s)	Blank(s)	Blank(s)	Blank(s)	988	0	98	Blank(s)	Miscellaneous Malignant Cancer	N/A not first tumor	N/A not first tumor	4
Any Medicaid	Single (never married)	55	1954	2009	December	Male	Black	C22.0-Liver	8170/3: Hepatocellular carcinoma, NOS	Well differentiated; Grade I	8.6.3 Carcinoma of liver and intrahepatic bile ducts	VII(b) Hepatic carcinomas	Positive exfoliative cytology, no positive histology	IIIB	T4	N0	M0	Blank(s)	Blank(s)	Blank(s)	Blank(s)	Blank(s)	Regional	0	None	None; diagnosed at autopsy	10	1	Blank(s)	Blank(s)	Blank(s)	Blank(s)	Blank(s)	Blank(s)	Blank(s)	Blank(s)	Blank(s)	Blank(s)	Blank(s)	Blank(s)	Blank(s)	988	0	98	Blank(s)	Liver	N/A not first tumor	N/A not first tumor	7
Blank(s)	Single (never married)	58	1945	2004	March	Male	White	C22.0-Liver	8170/3: Hepatocellular carcinoma, NOS	Moderately differentiated; Grade II	8.6.3 Carcinoma of liver and intrahepatic bile ducts	VII(b) Hepatic carcinomas	Positive histology	II	T2	N0	M0	Blank(s)	Blank(s)	Blank(s)	Blank(s)	Blank(s)	Localized	20	None	None; diagnosed at autopsy	10	999	Blank(s)	Blank(s)	Blank(s)	Blank(s)	Blank(s)	Blank(s)	Blank(s)	Blank(s)	Blank(s)	Blank(s)	Blank(s)	Blank(s)	Blank(s)	988	0	98	Blank(s)	Other Infectious and Parasitic Diseases including HIV	N/A not first tumor	N/A not first tumor	16
Blank(s)	Widowed	88	1916	2005	March	Female	Other (American Indian/AK Native, Asian/Pacific Islander)	C22.0-Liver	8000/3: Neoplasm, malignant	Unknown	10 Unspecified Malignant Neoplasms	VII(c) Unspecified malignant hepatic tumors	Unknown	IV	TX	NX	M1	Blank(s)	Blank(s)	Blank(s)	Blank(s)	Blank(s)	Distant	0	Unknown or not applicable	None; diagnosed at autopsy	999	999	Blank(s)	Blank(s)	Blank(s)	Blank(s)	Blank(s)	Blank(s)	Blank(s)	Blank(s)	Blank(s)	Blank(s)	Blank(s)	Blank(s)	Blank(s)	988	99	99	Blank(s)	Lung and Bronchus	N/A not first tumor	N/A not first tumor	6
Insured	Married (including common law)	85	1925	2010	December	Female	White	C22.0-Liver	8140/3: Adenocarcinoma, NOS	Unknown	8.6.3 Carcinoma of liver and intrahepatic bile ducts	VII(b) Hepatic carcinomas	Positive histology	IV	TX	N0	M1	Blank(s)	Blank(s)	Blank(s)	Blank(s)	Blank(s)	Distant	0	None	None; diagnosed at autopsy	20	999	Blank(s)	Blank(s)	Blank(s)	Blank(s)	Blank(s)	Blank(s)	Blank(s)	Blank(s)	Blank(s)	Blank(s)	Blank(s)	Blank(s)	Blank(s)	988	0	98	Blank(s)	Miscellaneous Malignant Cancer	N/A not first tumor	N/A not first tumor	1
Blank(s)	Married (including common law)	70	1933	2004	May	Male	White	C22.0-Liver	8170/3: Hepatocellular carcinoma, NOS	Unknown	8.6.3 Carcinoma of liver and intrahepatic bile ducts	VII(b) Hepatic carcinomas	Positive laboratory test/marker study	IV	TX	NX	M1	Blank(s)	Blank(s)	Blank(s)	Blank(s)	Blank(s)	Distant	0	None	None; diagnosed at autopsy	10	0	Blank(s)	Blank(s)	Blank(s)	Blank(s)	Blank(s)	Blank(s)	Blank(s)	Blank(s)	Blank(s)	Blank(s)	Blank(s)	Blank(s)	Blank(s)	988	0	98	Blank(s)	Liver	N/A not first tumor	N/A not first tumor	1
Insured/No specifics	Widowed	90	1919	2010	January	Male	White	C22.0-Liver	9120/3: Hemangiosarcoma	Unknown	5.3.1.1 Specified (excluding Kaposi sarcoma)	IX(d) Other specified soft tissue sarcomas	Positive histology	NA	NA	NA	NA	Blank(s)	Blank(s)	Blank(s)	Blank(s)	Blank(s)	Distant	0	None	None; diagnosed at autopsy	20	0	Blank(s)	Blank(s)	Blank(s)	Blank(s)	Blank(s)	Blank(s)	Blank(s)	Blank(s)	Blank(s)	Blank(s)	Blank(s)	Blank(s)	Blank(s)	988	0	98	Blank(s)	Soft Tissue including Heart	N/A not first tumor	N/A not first tumor	2
Blank(s)	Married (including common law)	52	1951	2004	December	Female	Black	C22.0-Liver	8170/3: Hepatocellular carcinoma, NOS	Moderately differentiated; Grade II	8.6.3 Carcinoma of liver and intrahepatic bile ducts	VII(b) Hepatic carcinomas	Positive histology	II	T2	N0	M0	Blank(s)	Blank(s)	Blank(s)	Blank(s)	Blank(s)	Regional	61	1 to 3 regional lymph nodes removed	None; diagnosed at autopsy	10	999	Blank(s)	Blank(s)	Blank(s)	Blank(s)	Blank(s)	Blank(s)	Blank(s)	Blank(s)	Blank(s)	Blank(s)	Blank(s)	Blank(s)	Blank(s)	988	0	98	Blank(s)	Liver	N/A not first tumor	N/A not first tumor	31
Insured	Married (including common law)	73	1935	2009	September	Male	Other (American Indian/AK Native, Asian/Pacific Islander)	C22.0-Liver	8170/3: Hepatocellular carcinoma, NOS	Unknown	8.6.3 Carcinoma of liver and intrahepatic bile ducts	VII(b) Hepatic carcinomas	Positive histology	IV	TX	N0	M1	Blank(s)	Blank(s)	Blank(s)	Blank(s)	Blank(s)	Distant	0	None	Non-primary surgical procedure to distant site	10	999	Blank(s)	Blank(s)	Blank(s)	Blank(s)	Blank(s)	Blank(s)	Blank(s)	Blank(s)	Blank(s)	Blank(s)	Blank(s)	Blank(s)	Blank(s)	988	0	98	Blank(s)	Liver	N/A not first tumor	N/A not first tumor	2
Insured	Single (never married)	84	1929	2013	December	Male	White	C22.0-Liver	8170/3: Hepatocellular carcinoma, NOS	Unknown	8.6.3 Carcinoma of liver and intrahepatic bile ducts	VII(b) Hepatic carcinomas	Radiography without microscopic confirm	I	T1	N0	M0	Blank(s)	Blank(s)	Blank(s)	Blank(s)	Blank(s)	Localized	0	None	None; diagnosed at autopsy	10	999	Blank(s)	Blank(s)	Blank(s)	Blank(s)	Blank(s)	Blank(s)	Blank(s)	Blank(s)	Blank(s)	Blank(s)	Blank(s)	Blank(s)	Blank(s)	988	0	98	Blank(s)	Liver	N/A not first tumor	N/A not first tumor	27
Blank(s)	Married (including common law)	64	1939	2004	August	Male	Black	C22.0-Liver	8170/3: Hepatocellular carcinoma, NOS	Unknown	8.6.3 Carcinoma of liver and intrahepatic bile ducts	VII(b) Hepatic carcinomas	Radiography without microscopic confirm	I	T1	N0	M0	Blank(s)	Blank(s)	Blank(s)	Blank(s)	Blank(s)	Localized	0	None	None; diagnosed at autopsy	10	999	Blank(s)	Blank(s)	Blank(s)	Blank(s)	Blank(s)	Blank(s)	Blank(s)	Blank(s)	Blank(s)	Blank(s)	Blank(s)	Blank(s)	Blank(s)	988	0	98	Blank(s)	Other Infectious and Parasitic Diseases including HIV	N/A not first tumor	N/A not first tumor	10
Blank(s)	Unknown	78	1926	2004	October	Male	Other (American Indian/AK Native, Asian/Pacific Islander)	C22.0-Liver	8171/3: Hepatocellular carcinoma, fibrolamellar	Unknown	8.6.3 Carcinoma of liver and intrahepatic bile ducts	VII(b) Hepatic carcinomas	Positive histology	I	T1	N0	M0	Blank(s)	Blank(s)	Blank(s)	Blank(s)	Blank(s)	Localized	0	None	None; diagnosed at autopsy	10	999	Blank(s)	Blank(s)	Blank(s)	Blank(s)	Blank(s)	Blank(s)	Blank(s)	Blank(s)	Blank(s)	Blank(s)	Blank(s)	Blank(s)	Blank(s)	988	0	98	Blank(s)	Liver	N/A not first tumor	N/A not first tumor	28
Insured	Married (including common law)	76	1933	2009	June	Female	Other (American Indian/AK Native, Asian/Pacific Islander)	C22.1-Intrahepatic bile duct	8160/3: Cholangiocarcinoma	Unknown	8.6.3 Carcinoma of liver and intrahepatic bile ducts	VII(b) Hepatic carcinomas	Positive histology	IV	T4	N0	M1	Blank(s)	Blank(s)	Blank(s)	Blank(s)	Blank(s)	Distant	0	None	None; diagnosed at autopsy	998	0	Blank(s)	Blank(s)	Blank(s)	Blank(s)	Blank(s)	Blank(s)	Blank(s)	Blank(s)	Blank(s)	Blank(s)	Blank(s)	Blank(s)	Blank(s)	988	0	98	Blank(s)	Miscellaneous Malignant Cancer	N/A not first tumor	N/A not first tumor	0
Insured/No specifics	Married (including common law)	77	1934	2012	April	Male	White	C22.0-Liver	8170/3: Hepatocellular carcinoma, NOS	Moderately differentiated; Grade II	8.6.3 Carcinoma of liver and intrahepatic bile ducts	VII(b) Hepatic carcinomas	Positive exfoliative cytology, no positive histology	IIIA	T3	N0	M0	Blank(s)	Blank(s)	Blank(s)	Blank(s)	Blank(s)	Regional	0	None	None; diagnosed at autopsy	20	1	Blank(s)	Blank(s)	Blank(s)	Blank(s)	Blank(s)	Blank(s)	Blank(s)	Blank(s)	Blank(s)	Blank(s)	Blank(s)	Blank(s)	Blank(s)	988	0	98	Blank(s)	Pneumonia and Influenza	N/A not first tumor	N/A not first tumor	5
Insured/No specifics	Married (including common law)	80	1933	2014	April	Male	White	C22.1-Intrahepatic bile duct	8160/3: Cholangiocarcinoma	Poorly differentiated; Grade III	8.6.3 Carcinoma of liver and intrahepatic bile ducts	VII(b) Hepatic carcinomas	Positive histology	IV	T3	N1	M1	Blank(s)	Blank(s)	Blank(s)	Blank(s)	Blank(s)	Distant	0	None	None; diagnosed at autopsy	20	0	Blank(s)	Blank(s)	Blank(s)	Blank(s)	Blank(s)	Blank(s)	Blank(s)	Blank(s)	Blank(s)	Blank(s)	Blank(s)	Blank(s)	Blank(s)	988	0	98	Blank(s)	Intrahepatic Bile Duct	N/A not first tumor	N/A not first tumor	18
Insured/No specifics	Married (including common law)	78	1936	2014	November	Male	White	C22.0-Liver	8170/3: Hepatocellular carcinoma, NOS	Unknown	8.6.3 Carcinoma of liver and intrahepatic bile ducts	VII(b) Hepatic carcinomas	Radiography without microscopic confirm	I	T1	N0	M0	Blank(s)	Blank(s)	Blank(s)	Blank(s)	Blank(s)	Localized	0	None	None; diagnosed at autopsy	10	999	Blank(s)	Blank(s)	Blank(s)	Blank(s)	Blank(s)	Blank(s)	Blank(s)	Blank(s)	Blank(s)	Blank(s)	Blank(s)	Blank(s)	Blank(s)	988	0	98	Blank(s)	Liver	N/A not first tumor	N/A not first tumor	18
Insured	Married (including common law)	84	1923	2007	October	Male	White	C22.1-Intrahepatic bile duct	8160/3: Cholangiocarcinoma	Unknown	8.6.3 Carcinoma of liver and intrahepatic bile ducts	VII(b) Hepatic carcinomas	Positive histology	UNK Stage	TX	N0	M0	Blank(s)	Blank(s)	Blank(s)	Blank(s)	Blank(s)	Localized	0	None	None; diagnosed at autopsy	999	999	Blank(s)	Blank(s)	Blank(s)	Blank(s)	Blank(s)	Blank(s)	Blank(s)	Blank(s)	Blank(s)	Blank(s)	Blank(s)	Blank(s)	Blank(s)	988	0	98	Blank(s)	Intrahepatic Bile Duct	N/A not first tumor	N/A not first tumor	1
Blank(s)	Married (including common law)	84	1920	2004	July	Female	Other (American Indian/AK Native, Asian/Pacific Islander)	C22.0-Liver	8170/3: Hepatocellular carcinoma, NOS	Unknown	8.6.3 Carcinoma of liver and intrahepatic bile ducts	VII(b) Hepatic carcinomas	Radiography without microscopic confirm	IV	T2	N0	M1	Blank(s)	Blank(s)	Blank(s)	Blank(s)	Blank(s)	Distant	0	None	None; diagnosed at autopsy	20	999	Blank(s)	Blank(s)	Blank(s)	Blank(s)	Blank(s)	Blank(s)	Blank(s)	Blank(s)	Blank(s)	Blank(s)	Blank(s)	Blank(s)	Blank(s)	988	0	98	Blank(s)	Liver	N/A not first tumor	N/A not first tumor	7
Insured	Divorced	80	1930	2011	January	Female	White	C22.1-Intrahepatic bile duct	8160/3: Cholangiocarcinoma	Moderately differentiated; Grade II	8.6.3 Carcinoma of liver and intrahepatic bile ducts	VII(b) Hepatic carcinomas	Positive histology	IV	T2	N1	M1	Blank(s)	Blank(s)	Blank(s)	Blank(s)	Blank(s)	Distant	66	4 or more regional lymph nodes removed	None; diagnosed at autopsy	999	0	Blank(s)	Blank(s)	Blank(s)	Blank(s)	Blank(s)	Blank(s)	Blank(s)	Blank(s)	Blank(s)	Blank(s)	Blank(s)	Blank(s)	Blank(s)	988	8	3	Blank(s)	Intrahepatic Bile Duct	N/A not first tumor	N/A not first tumor	59
Blank(s)	Married (including common law)	65	1940	2006	January	Male	Other (American Indian/AK Native, Asian/Pacific Islander)	C22.0-Liver	8170/3: Hepatocellular carcinoma, NOS	Well differentiated; Grade I	8.6.3 Carcinoma of liver and intrahepatic bile ducts	VII(b) Hepatic carcinomas	Positive histology	I	T1	N0	M0	Blank(s)	Blank(s)	Blank(s)	Blank(s)	Blank(s)	Localized	61	None	None; diagnosed at autopsy	10	999	Blank(s)	Blank(s)	Blank(s)	Blank(s)	Blank(s)	Blank(s)	Blank(s)	Blank(s)	Blank(s)	Blank(s)	Blank(s)	Blank(s)	Blank(s)	988	0	98	Blank(s)	Liver	N/A not first tumor	N/A not first tumor	3
Blank(s)	Single (never married)	55	1951	2006	April	Female	Black	C22.0-Liver	8010/3: Carcinoma, NOS	Unknown	8.6.3 Carcinoma of liver and intrahepatic bile ducts	VII(b) Hepatic carcinomas	Positive histology	IV	T3	N0	M1	Blank(s)	Blank(s)	Blank(s)	Blank(s)	Blank(s)	Distant	0	None	None; diagnosed at autopsy	10	999	Blank(s)	Blank(s)	Blank(s)	Blank(s)	Blank(s)	Blank(s)	Blank(s)	Blank(s)	Blank(s)	Blank(s)	Blank(s)	Blank(s)	Blank(s)	988	0	98	Blank(s)	Miscellaneous Malignant Cancer	N/A not first tumor	N/A not first tumor	0
Insured	Married (including common law)	69	1944	2014	April	Female	White	C22.1-Intrahepatic bile duct	8160/3: Cholangiocarcinoma	Unknown	8.6.3 Carcinoma of liver and intrahepatic bile ducts	VII(b) Hepatic carcinomas	Positive histology	I	T1	N0	M0	Blank(s)	Blank(s)	Blank(s)	Blank(s)	Blank(s)	Localized	0	None	None; diagnosed at autopsy	10	999	Blank(s)	Blank(s)	Blank(s)	Blank(s)	Blank(s)	Blank(s)	Blank(s)	Blank(s)	Blank(s)	Blank(s)	Blank(s)	Blank(s)	Blank(s)	988	0	98	Blank(s)	Other Infectious and Parasitic Diseases including HIV	N/A not first tumor	N/A not first tumor	22
Insured	Married (including common law)	77	1929	2007	January	Male	Other (American Indian/AK Native, Asian/Pacific Islander)	C22.0-Liver	8170/3: Hepatocellular carcinoma, NOS	Well differentiated; Grade I	8.6.3 Carcinoma of liver and intrahepatic bile ducts	VII(b) Hepatic carcinomas	Positive histology	I	T1	N0	M0	Blank(s)	Blank(s)	Blank(s)	Blank(s)	Blank(s)	Localized	0	None	None; diagnosed at autopsy	20	999	Blank(s)	Blank(s)	Blank(s)	Blank(s)	Blank(s)	Blank(s)	Blank(s)	Blank(s)	Blank(s)	Blank(s)	Blank(s)	Blank(s)	Blank(s)	988	0	98	Blank(s)	Liver	N/A not first tumor	N/A not first tumor	80
Insured	Single (never married)	86	1922	2009	October	Female	White	C22.0-Liver	8170/3: Hepatocellular carcinoma, NOS	Unknown	8.6.3 Carcinoma of liver and intrahepatic bile ducts	VII(b) Hepatic carcinomas	Radiography without microscopic confirm	UNK Stage	T1	NX	MX	Blank(s)	Blank(s)	Blank(s)	Blank(s)	Blank(s)	Localized	0	None	None; diagnosed at autopsy	10	999	Blank(s)	Blank(s)	Blank(s)	Blank(s)	Blank(s)	Blank(s)	Blank(s)	Blank(s)	Blank(s)	Blank(s)	Blank(s)	Blank(s)	Blank(s)	988	0	98	Blank(s)	Liver	N/A not first tumor	N/A not first tumor	5
Insured/No specifics	Widowed	85	1928	2013	September	Male	White	C22.0-Liver	8170/3: Hepatocellular carcinoma, NOS	Unknown	8.6.3 Carcinoma of liver and intrahepatic bile ducts	VII(b) Hepatic carcinomas	Radiography without microscopic confirm	IIIA	T3	N0	M0	Blank(s)	Blank(s)	Blank(s)	Blank(s)	Blank(s)	Localized	0	None	None; diagnosed at autopsy	10	999	Blank(s)	Blank(s)	Blank(s)	Blank(s)	Blank(s)	Blank(s)	Blank(s)	Blank(s)	Blank(s)	Blank(s)	Blank(s)	Blank(s)	Blank(s)	988	0	98	Blank(s)	Liver	N/A not first tumor	N/A not first tumor	3
Insurance status unknown	Widowed	91	1916	2008	March	Female	Other (American Indian/AK Native, Asian/Pacific Islander)	C22.0-Liver	8170/3: Hepatocellular carcinoma, NOS	Unknown	8.6.3 Carcinoma of liver and intrahepatic bile ducts	VII(b) Hepatic carcinomas	Positive histology	I	T1	N0	M0	Blank(s)	Blank(s)	Blank(s)	Blank(s)	Blank(s)	Localized	0	None	None; diagnosed at autopsy	10	0	Blank(s)	Blank(s)	Blank(s)	Blank(s)	Blank(s)	Blank(s)	Blank(s)	Blank(s)	Blank(s)	Blank(s)	Blank(s)	Blank(s)	Blank(s)	988	0	98	Blank(s)	Liver	N/A not first tumor	N/A not first tumor	13
Blank(s)	Married (including common law)	80	1923	2004	February	Male	White	C22.0-Liver	8000/3: Neoplasm, malignant	Unknown	10 Unspecified Malignant Neoplasms	VII(c) Unspecified malignant hepatic tumors	Unknown	UNK Stage	TX	NX	MX	Blank(s)	Blank(s)	Blank(s)	Blank(s)	Blank(s)	Unknown/unstaged	99	Unknown or not applicable	Unknown; death certificate only	999	999	Blank(s)	Blank(s)	Blank(s)	Blank(s)	Blank(s)	Blank(s)	Blank(s)	Blank(s)	Blank(s)	Blank(s)	Blank(s)	Blank(s)	Blank(s)	988	99	99	Blank(s)	Liver	N/A not first tumor	N/A not first tumor	Unknown
Insured	Widowed	85	1924	2009	August	Male	Other (American Indian/AK Native, Asian/Pacific Islander)	C22.0-Liver	8170/3: Hepatocellular carcinoma, NOS	Moderately differentiated; Grade II	8.6.3 Carcinoma of liver and intrahepatic bile ducts	VII(b) Hepatic carcinomas	Positive histology	IIINOS	T3	NX	M0	Blank(s)	Blank(s)	Blank(s)	Blank(s)	Blank(s)	Regional	0	None	None; diagnosed at autopsy	999	999	Blank(s)	Blank(s)	Blank(s)	Blank(s)	Blank(s)	Blank(s)	Blank(s)	Blank(s)	Blank(s)	Blank(s)	Blank(s)	Blank(s)	Blank(s)	988	0	98	Blank(s)	Liver	N/A not first tumor	N/A not first tumor	6
Insured	Divorced	74	1936	2010	December	Female	White	C22.1-Intrahepatic bile duct	8160/3: Cholangiocarcinoma	Moderately differentiated; Grade II	8.6.3 Carcinoma of liver and intrahepatic bile ducts	VII(b) Hepatic carcinomas	Positive histology	I	T1	N0	M0	Blank(s)	Blank(s)	Blank(s)	Blank(s)	Blank(s)	Regional	50	1 to 3 regional lymph nodes removed	None; diagnosed at autopsy	998	999	Blank(s)	Blank(s)	Blank(s)	Blank(s)	Blank(s)	Blank(s)	Blank(s)	Blank(s)	Blank(s)	Blank(s)	Blank(s)	Blank(s)	Blank(s)	988	1	0	Blank(s)	Alive	N/A not first tumor	N/A not first tumor	72
Blank(s)	Widowed	84	1920	2005	April	Female	White	C22.1-Intrahepatic bile duct	8160/3: Cholangiocarcinoma	Moderately differentiated; Grade II	8.6.3 Carcinoma of liver and intrahepatic bile ducts	VII(b) Hepatic carcinomas	Positive histology	I	T1	N0	M0	Blank(s)	Blank(s)	Blank(s)	Blank(s)	Blank(s)	Localized	36	1 to 3 regional lymph nodes removed	None; diagnosed at autopsy	999	999	Blank(s)	Blank(s)	Blank(s)	Blank(s)	Blank(s)	Blank(s)	Blank(s)	Blank(s)	Blank(s)	Blank(s)	Blank(s)	Blank(s)	Blank(s)	988	1	0	Blank(s)	Cerebrovascular Diseases	N/A not first tumor	N/A not first tumor	113
Insured	Married (including common law)	68	1945	2013	February	Male	White	C22.1-Intrahepatic bile duct	8160/3: Cholangiocarcinoma	Unknown	8.6.3 Carcinoma of liver and intrahepatic bile ducts	VII(b) Hepatic carcinomas	Positive histology	IV	TX	N1	M1	Blank(s)	Blank(s)	Blank(s)	Blank(s)	Blank(s)	Distant	0	None	None; diagnosed at autopsy	998	999	Blank(s)	Blank(s)	Blank(s)	Blank(s)	Blank(s)	Blank(s)	Blank(s)	Blank(s)	Blank(s)	Blank(s)	Blank(s)	Blank(s)	Blank(s)	988	0	98	Blank(s)	Intrahepatic Bile Duct	N/A not first tumor	N/A not first tumor	0
Insured	Married (including common law)	75	1934	2009	November	Male	Other (American Indian/AK Native, Asian/Pacific Islander)	C22.0-Liver	8170/3: Hepatocellular carcinoma, NOS	Unknown	8.6.3 Carcinoma of liver and intrahepatic bile ducts	VII(b) Hepatic carcinomas	Radiography without microscopic confirm	IIIA	T3	N0	M0	Blank(s)	Blank(s)	Blank(s)	Blank(s)	Blank(s)	Regional	0	None	None; diagnosed at autopsy	20	1	Blank(s)	Blank(s)	Blank(s)	Blank(s)	Blank(s)	Blank(s)	Blank(s)	Blank(s)	Blank(s)	Blank(s)	Blank(s)	Blank(s)	Blank(s)	988	0	98	Blank(s)	Liver	N/A not first tumor	N/A not first tumor	5
Insured	Single (never married)	47	1965	2013	April	Male	White	C22.0-Liver	8170/3: Hepatocellular carcinoma, NOS	Unknown	8.6.3 Carcinoma of liver and intrahepatic bile ducts	VII(b) Hepatic carcinomas	Clinical diagnosis only	I	T1	N0	M0	Blank(s)	Blank(s)	Blank(s)	Blank(s)	Blank(s)	Localized	0	None	None; diagnosed at autopsy	10	1	Blank(s)	Blank(s)	Blank(s)	Blank(s)	Blank(s)	Blank(s)	Blank(s)	Blank(s)	Blank(s)	Blank(s)	Blank(s)	Blank(s)	Blank(s)	988	0	98	Blank(s)	Liver	N/A not first tumor	N/A not first tumor	10
Insured	Unknown	70	1942	2012	December	Female	White	C22.0-Liver	8140/3: Adenocarcinoma, NOS	Unknown	8.6.3 Carcinoma of liver and intrahepatic bile ducts	VII(b) Hepatic carcinomas	Positive histology	UNK Stage	TX	N0	M0	Blank(s)	Blank(s)	Blank(s)	Blank(s)	Blank(s)	Localized	0	None	None; diagnosed at autopsy	20	999	Blank(s)	Blank(s)	Blank(s)	Blank(s)	Blank(s)	Blank(s)	Blank(s)	Blank(s)	Blank(s)	Blank(s)	Blank(s)	Blank(s)	Blank(s)	988	0	98	Blank(s)	Pancreas	N/A not first tumor	N/A not first tumor	0
Any Medicaid	Married (including common law)	80	1927	2007	October	Male	Other (American Indian/AK Native, Asian/Pacific Islander)	C22.0-Liver	8170/3: Hepatocellular carcinoma, NOS	Moderately differentiated; Grade II	8.6.3 Carcinoma of liver and intrahepatic bile ducts	VII(b) Hepatic carcinomas	Positive histology	I	T1	N0	M0	Blank(s)	Blank(s)	Blank(s)	Blank(s)	Blank(s)	Localized	0	None	None; diagnosed at autopsy	10	999	Blank(s)	Blank(s)	Blank(s)	Blank(s)	Blank(s)	Blank(s)	Blank(s)	Blank(s)	Blank(s)	Blank(s)	Blank(s)	Blank(s)	Blank(s)	988	0	98	Blank(s)	Liver	N/A not first tumor	N/A not first tumor	4
Any Medicaid	Single (never married)	45	1965	2010	May	Male	Black	C22.0-Liver	8170/3: Hepatocellular carcinoma, NOS	Unknown	8.6.3 Carcinoma of liver and intrahepatic bile ducts	VII(b) Hepatic carcinomas	Positive laboratory test/marker study	I	T1	N0	M0	Blank(s)	Blank(s)	Blank(s)	Blank(s)	Blank(s)	Localized	0	None	None; diagnosed at autopsy	10	1	Blank(s)	Blank(s)	Blank(s)	Blank(s)	Blank(s)	Blank(s)	Blank(s)	Blank(s)	Blank(s)	Blank(s)	Blank(s)	Blank(s)	Blank(s)	988	0	98	Blank(s)	Other Infectious and Parasitic Diseases including HIV	N/A not first tumor	N/A not first tumor	6
Blank(s)	Married (including common law)	78	1926	2004	May	Male	White	C22.0-Liver	8170/3: Hepatocellular carcinoma, NOS	Well differentiated; Grade I	8.6.3 Carcinoma of liver and intrahepatic bile ducts	VII(b) Hepatic carcinomas	Positive histology	II	T2	N0	M0	Blank(s)	Blank(s)	Blank(s)	Blank(s)	Blank(s)	Localized	16	None	None; diagnosed at autopsy	20	0	Blank(s)	Blank(s)	Blank(s)	Blank(s)	Blank(s)	Blank(s)	Blank(s)	Blank(s)	Blank(s)	Blank(s)	Blank(s)	Blank(s)	Blank(s)	988	0	98	Blank(s)	Liver	N/A not first tumor	N/A not first tumor	123
Insured	Divorced	71	1943	2014	November	Female	Black	C22.0-Liver	8170/3: Hepatocellular carcinoma, NOS	Unknown	8.6.3 Carcinoma of liver and intrahepatic bile ducts	VII(b) Hepatic carcinomas	Radiography without microscopic confirm	I	T1	N0	M0	Blank(s)	Blank(s)	Blank(s)	Blank(s)	Blank(s)	Localized	0	None	None; diagnosed at autopsy	10	1	Blank(s)	Blank(s)	Blank(s)	Blank(s)	Blank(s)	Blank(s)	Blank(s)	Blank(s)	Blank(s)	Blank(s)	Blank(s)	Blank(s)	Blank(s)	988	0	98	Blank(s)	Liver	N/A not first tumor	N/A not first tumor	19
Insured	Married (including common law)	62	1948	2010	May	Male	Other (American Indian/AK Native, Asian/Pacific Islander)	C22.0-Liver	8170/3: Hepatocellular carcinoma, NOS	Unknown	8.6.3 Carcinoma of liver and intrahepatic bile ducts	VII(b) Hepatic carcinomas	Radiography without microscopic confirm	UNK Stage	T3	N0	MX	Blank(s)	Blank(s)	Blank(s)	Blank(s)	Blank(s)	Regional	0	None	None; diagnosed at autopsy	998	999	Blank(s)	Blank(s)	Blank(s)	Blank(s)	Blank(s)	Blank(s)	Blank(s)	Blank(s)	Blank(s)	Blank(s)	Blank(s)	Blank(s)	Blank(s)	988	0	98	Blank(s)	Miscellaneous Malignant Cancer	N/A not first tumor	N/A not first tumor	0
Blank(s)	Married (including common law)	83	1922	2006	March	Male	Other (American Indian/AK Native, Asian/Pacific Islander)	C22.0-Liver	8170/3: Hepatocellular carcinoma, NOS	Well differentiated; Grade I	8.6.3 Carcinoma of liver and intrahepatic bile ducts	VII(b) Hepatic carcinomas	Positive exfoliative cytology, no positive histology	I	T1	N0	M0	Blank(s)	Blank(s)	Blank(s)	Blank(s)	Blank(s)	Localized	0	None	None; diagnosed at autopsy	20	999	Blank(s)	Blank(s)	Blank(s)	Blank(s)	Blank(s)	Blank(s)	Blank(s)	Blank(s)	Blank(s)	Blank(s)	Blank(s)	Blank(s)	Blank(s)	988	0	98	Blank(s)	Liver	N/A not first tumor	N/A not first tumor	4
Insured	Divorced	70	1937	2008	February	Male	White	C22.0-Liver	8170/3: Hepatocellular carcinoma, NOS	Unknown	8.6.3 Carcinoma of liver and intrahepatic bile ducts	VII(b) Hepatic carcinomas	Positive histology	I	T1	N0	M0	Blank(s)	Blank(s)	Blank(s)	Blank(s)	Blank(s)	Localized	0	None	None; diagnosed at autopsy	20	999	Blank(s)	Blank(s)	Blank(s)	Blank(s)	Blank(s)	Blank(s)	Blank(s)	Blank(s)	Blank(s)	Blank(s)	Blank(s)	Blank(s)	Blank(s)	988	0	98	Blank(s)	Liver	N/A not first tumor	N/A not first tumor	12
Insured	Single (never married)	63	1950	2013	November	Male	White	C22.0-Liver	8170/3: Hepatocellular carcinoma, NOS	Unknown	8.6.3 Carcinoma of liver and intrahepatic bile ducts	VII(b) Hepatic carcinomas	Radiography without microscopic confirm	I	T1	N0	M0	Blank(s)	Blank(s)	Blank(s)	Blank(s)	Blank(s)	Localized	0	None	None; diagnosed at autopsy	20	999	Blank(s)	Blank(s)	Blank(s)	Blank(s)	Blank(s)	Blank(s)	Blank(s)	Blank(s)	Blank(s)	Blank(s)	Blank(s)	Blank(s)	Blank(s)	988	0	98	Blank(s)	Alive	N/A not first tumor	N/A not first tumor	37
Blank(s)	Married (including common law)	80	1924	2005	June	Male	White	C22.0-Liver	8170/3: Hepatocellular carcinoma, NOS	Unknown	8.6.3 Carcinoma of liver and intrahepatic bile ducts	VII(b) Hepatic carcinomas	Positive histology	II	T2	N0	M0	Blank(s)	Blank(s)	Blank(s)	Blank(s)	Blank(s)	Regional	0	None	None; diagnosed at autopsy	20	999	Blank(s)	Blank(s)	Blank(s)	Blank(s)	Blank(s)	Blank(s)	Blank(s)	Blank(s)	Blank(s)	Blank(s)	Blank(s)	Blank(s)	Blank(s)	988	0	98	Blank(s)	Liver	N/A not first tumor	N/A not first tumor	84
Insured	Married (including common law)	79	1927	2007	February	Male	Black	C22.0-Liver	8170/3: Hepatocellular carcinoma, NOS	Poorly differentiated; Grade III	8.6.3 Carcinoma of liver and intrahepatic bile ducts	VII(b) Hepatic carcinomas	Positive exfoliative cytology, no positive histology	II	T2	N0	M0	Blank(s)	Blank(s)	Blank(s)	Blank(s)	Blank(s)	Localized	66	None	None; diagnosed at autopsy	10	0	Blank(s)	Blank(s)	Blank(s)	Blank(s)	Blank(s)	Blank(s)	Blank(s)	Blank(s)	Blank(s)	Blank(s)	Blank(s)	Blank(s)	Blank(s)	988	0	98	Blank(s)	Liver	N/A not first tumor	N/A not first tumor	10
Insured	Unknown	57	1954	2011	November	Male	Black	C22.0-Liver	8170/3: Hepatocellular carcinoma, NOS	Moderately differentiated; Grade II	8.6.3 Carcinoma of liver and intrahepatic bile ducts	VII(b) Hepatic carcinomas	Positive exfoliative cytology, no positive histology	IIIA	T3	N0	M0	Blank(s)	Blank(s)	Blank(s)	Blank(s)	Blank(s)	Localized	0	None	None; diagnosed at autopsy	10	1	Blank(s)	Blank(s)	Blank(s)	Blank(s)	Blank(s)	Blank(s)	Blank(s)	Blank(s)	Blank(s)	Blank(s)	Blank(s)	Blank(s)	Blank(s)	988	0	98	Blank(s)	Liver	N/A not first tumor	N/A not first tumor	6
Insured/No specifics	Single (never married)	69	1945	2014	July	Male	White	C22.0-Liver	8170/3: Hepatocellular carcinoma, NOS	Unknown	8.6.3 Carcinoma of liver and intrahepatic bile ducts	VII(b) Hepatic carcinomas	Radiography without microscopic confirm	I	T1	N0	M0	Blank(s)	Blank(s)	Blank(s)	Blank(s)	Blank(s)	Localized	0	None	None; diagnosed at autopsy	20	1	Blank(s)	Blank(s)	Blank(s)	Blank(s)	Blank(s)	Blank(s)	Blank(s)	Blank(s)	Blank(s)	Blank(s)	Blank(s)	Blank(s)	Blank(s)	988	0	98	Blank(s)	Alive	N/A not first tumor	N/A not first tumor	29
Insured	Widowed	81	1927	2008	August	Male	Other (American Indian/AK Native, Asian/Pacific Islander)	C22.0-Liver	8170/3: Hepatocellular carcinoma, NOS	Poorly differentiated; Grade III	8.6.3 Carcinoma of liver and intrahepatic bile ducts	VII(b) Hepatic carcinomas	Positive histology	I	T1	N0	M0	Blank(s)	Blank(s)	Blank(s)	Blank(s)	Blank(s)	Regional	0	None	None; diagnosed at autopsy	10	999	Blank(s)	Blank(s)	Blank(s)	Blank(s)	Blank(s)	Blank(s)	Blank(s)	Blank(s)	Blank(s)	Blank(s)	Blank(s)	Blank(s)	Blank(s)	988	0	98	Blank(s)	Liver	N/A not first tumor	N/A not first tumor	12
Insured	Widowed	84	1923	2008	March	Female	White	C22.1-Intrahepatic bile duct	8160/3: Cholangiocarcinoma	Unknown	8.6.3 Carcinoma of liver and intrahepatic bile ducts	VII(b) Hepatic carcinomas	Positive histology	IV	TX	N0	M1	Blank(s)	Blank(s)	Blank(s)	Blank(s)	Blank(s)	Distant	0	None	None; diagnosed at autopsy	998	999	Blank(s)	Blank(s)	Blank(s)	Blank(s)	Blank(s)	Blank(s)	Blank(s)	Blank(s)	Blank(s)	Blank(s)	Blank(s)	Blank(s)	Blank(s)	988	0	98	Blank(s)	Intrahepatic Bile Duct	N/A not first tumor	N/A not first tumor	2
Insured	Married (including common law)	60	1950	2010	May	Male	Other (American Indian/AK Native, Asian/Pacific Islander)	C22.0-Liver	8174/3: Hepatocellular carcinoma, clear cell type	Moderately differentiated; Grade II	8.6.3 Carcinoma of liver and intrahepatic bile ducts	VII(b) Hepatic carcinomas	Positive histology	I	T1	N0	M0	Blank(s)	Blank(s)	Blank(s)	Blank(s)	Blank(s)	Localized	20	None	None; diagnosed at autopsy	20	999	Blank(s)	Blank(s)	Blank(s)	Blank(s)	Blank(s)	Blank(s)	Blank(s)	Blank(s)	Blank(s)	Blank(s)	Blank(s)	Blank(s)	Blank(s)	988	0	98	Blank(s)	Alive	N/A not first tumor	N/A not first tumor	79
Insured	Married (including common law)	59	1947	2007	February	Male	Other (American Indian/AK Native, Asian/Pacific Islander)	C22.0-Liver	8170/3: Hepatocellular carcinoma, NOS	Unknown	8.6.3 Carcinoma of liver and intrahepatic bile ducts	VII(b) Hepatic carcinomas	Clinical diagnosis only	I	T1	N0	M0	Blank(s)	Blank(s)	Blank(s)	Blank(s)	Blank(s)	Localized	0	None	None; diagnosed at autopsy	10	1	Blank(s)	Blank(s)	Blank(s)	Blank(s)	Blank(s)	Blank(s)	Blank(s)	Blank(s)	Blank(s)	Blank(s)	Blank(s)	Blank(s)	Blank(s)	988	0	98	Blank(s)	Alive	N/A not first tumor	N/A not first tumor	118
Insured	Single (never married)	59	1950	2009	September	Male	White	C22.0-Liver	8170/3: Hepatocellular carcinoma, NOS	Unknown	8.6.3 Carcinoma of liver and intrahepatic bile ducts	VII(b) Hepatic carcinomas	Positive histology	II	T2	N0	M0	Blank(s)	Blank(s)	Blank(s)	Blank(s)	Blank(s)	Regional	0	None	None; diagnosed at autopsy	10	999	Blank(s)	Blank(s)	Blank(s)	Blank(s)	Blank(s)	Blank(s)	Blank(s)	Blank(s)	Blank(s)	Blank(s)	Blank(s)	Blank(s)	Blank(s)	988	0	98	Blank(s)	Alive	N/A not first tumor	N/A not first tumor	87
Blank(s)	Divorced	60	1943	2004	March	Male	Black	C22.0-Liver	8170/3: Hepatocellular carcinoma, NOS	Moderately differentiated; Grade II	8.6.3 Carcinoma of liver and intrahepatic bile ducts	VII(b) Hepatic carcinomas	Positive histology	I	T1	N0	M0	Blank(s)	Blank(s)	Blank(s)	Blank(s)	Blank(s)	Localized	26	None	None; diagnosed at autopsy	20	999	Blank(s)	Blank(s)	Blank(s)	Blank(s)	Blank(s)	Blank(s)	Blank(s)	Blank(s)	Blank(s)	Blank(s)	Blank(s)	Blank(s)	Blank(s)	988	0	98	Blank(s)	Alive	N/A not first tumor	N/A not first tumor	153
Insured	Widowed	75	1931	2007	January	Male	White	C22.0-Liver	8170/3: Hepatocellular carcinoma, NOS	Unknown	8.6.3 Carcinoma of liver and intrahepatic bile ducts	VII(b) Hepatic carcinomas	Positive histology	UNK Stage	T1	NX	M0	Blank(s)	Blank(s)	Blank(s)	Blank(s)	Blank(s)	Localized	16	None	None; diagnosed at autopsy	10	999	Blank(s)	Blank(s)	Blank(s)	Blank(s)	Blank(s)	Blank(s)	Blank(s)	Blank(s)	Blank(s)	Blank(s)	Blank(s)	Blank(s)	Blank(s)	988	0	98	Blank(s)	Liver	N/A not first tumor	N/A not first tumor	13
Insured	Married (including common law)	64	1944	2009	February	Female	White	C22.1-Intrahepatic bile duct	8160/3: Cholangiocarcinoma	Unknown	8.6.3 Carcinoma of liver and intrahepatic bile ducts	VII(b) Hepatic carcinomas	Positive exfoliative cytology, no positive histology	IV	TX	N0	M1	Blank(s)	Blank(s)	Blank(s)	Blank(s)	Blank(s)	Distant	0	None	None; diagnosed at autopsy	998	999	Blank(s)	Blank(s)	Blank(s)	Blank(s)	Blank(s)	Blank(s)	Blank(s)	Blank(s)	Blank(s)	Blank(s)	Blank(s)	Blank(s)	Blank(s)	988	0	98	Blank(s)	Intrahepatic Bile Duct	N/A not first tumor	N/A not first tumor	2
Insured	Unknown	84	1927	2011	July	Female	White	C22.1-Intrahepatic bile duct	8160/3: Cholangiocarcinoma	Unknown	8.6.3 Carcinoma of liver and intrahepatic bile ducts	VII(b) Hepatic carcinomas	Positive histology	UNK Stage	TX	N0	M0	Blank(s)	Blank(s)	Blank(s)	Blank(s)	Blank(s)	Localized	0	Unknown or not applicable	None; diagnosed at autopsy	999	999	Blank(s)	Blank(s)	Blank(s)	Blank(s)	Blank(s)	Blank(s)	Blank(s)	Blank(s)	Blank(s)	Blank(s)	Blank(s)	Blank(s)	Blank(s)	988	0	98	Blank(s)	Intrahepatic Bile Duct	N/A not first tumor	N/A not first tumor	2
Any Medicaid	Separated	48	1959	2007	February	Male	Black	C22.0-Liver	8170/3: Hepatocellular carcinoma, NOS	Unknown	8.6.3 Carcinoma of liver and intrahepatic bile ducts	VII(b) Hepatic carcinomas	Radiography without microscopic confirm	UNK Stage	TX	N0	M0	Blank(s)	Blank(s)	Blank(s)	Blank(s)	Blank(s)	Localized	0	None	None; diagnosed at autopsy	999	999	Blank(s)	Blank(s)	Blank(s)	Blank(s)	Blank(s)	Blank(s)	Blank(s)	Blank(s)	Blank(s)	Blank(s)	Blank(s)	Blank(s)	Blank(s)	988	0	98	Blank(s)	Liver	N/A not first tumor	N/A not first tumor	5
Insured	Married (including common law)	69	1945	2014	October	Male	Other (American Indian/AK Native, Asian/Pacific Islander)	C22.0-Liver	8170/3: Hepatocellular carcinoma, NOS	Well differentiated; Grade I	8.6.3 Carcinoma of liver and intrahepatic bile ducts	VII(b) Hepatic carcinomas	Positive histology	II	T2	N0	M0	Blank(s)	Blank(s)	Blank(s)	Blank(s)	Blank(s)	Localized	0	None	None; diagnosed at autopsy	20	999	Blank(s)	Blank(s)	Blank(s)	Blank(s)	Blank(s)	Blank(s)	Blank(s)	Blank(s)	Blank(s)	Blank(s)	Blank(s)	Blank(s)	Blank(s)	988	0	98	Blank(s)	Alive	N/A not first tumor	N/A not first tumor	26
Insured/No specifics	Married (including common law)	89	1923	2012	September	Male	White	C22.0-Liver	8170/3: Hepatocellular carcinoma, NOS	Unknown	8.6.3 Carcinoma of liver and intrahepatic bile ducts	VII(b) Hepatic carcinomas	Clinical diagnosis only	I	T1	N0	M0	Blank(s)	Blank(s)	Blank(s)	Blank(s)	Blank(s)	Localized	0	None	None; diagnosed at autopsy	20	1	Blank(s)	Blank(s)	Blank(s)	Blank(s)	Blank(s)	Blank(s)	Blank(s)	Blank(s)	Blank(s)	Blank(s)	Blank(s)	Blank(s)	Blank(s)	988	0	98	Blank(s)	Liver	N/A not first tumor	N/A not first tumor	19
Blank(s)	Single (never married)	60	1944	2005	December	Male	White	C22.0-Liver	8170/3: Hepatocellular carcinoma, NOS	Moderately differentiated; Grade II	8.6.3 Carcinoma of liver and intrahepatic bile ducts	VII(b) Hepatic carcinomas	Positive histology	IIIB	T4	N0	M0	Blank(s)	Blank(s)	Blank(s)	Blank(s)	Blank(s)	Regional	0	None	None; diagnosed at autopsy	20	999	Blank(s)	Blank(s)	Blank(s)	Blank(s)	Blank(s)	Blank(s)	Blank(s)	Blank(s)	Blank(s)	Blank(s)	Blank(s)	Blank(s)	Blank(s)	988	0	98	Blank(s)	Liver	N/A not first tumor	N/A not first tumor	4
Insured	Married (including common law)	68	1944	2012	April	Male	White	C22.0-Liver	8170/3: Hepatocellular carcinoma, NOS	Unknown	8.6.3 Carcinoma of liver and intrahepatic bile ducts	VII(b) Hepatic carcinomas	Positive laboratory test/marker study	I	T1	N0	M0	Blank(s)	Blank(s)	Blank(s)	Blank(s)	Blank(s)	Localized	0	None	None; diagnosed at autopsy	10	1	Blank(s)	Blank(s)	Blank(s)	Blank(s)	Blank(s)	Blank(s)	Blank(s)	Blank(s)	Blank(s)	Blank(s)	Blank(s)	Blank(s)	Blank(s)	988	0	98	Blank(s)	Chronic Obstructive Pulmonary Disease and Allied Cond	N/A not first tumor	N/A not first tumor	1
Insured	Widowed	80	1930	2010	September	Male	White	C22.0-Liver	8170/3: Hepatocellular carcinoma, NOS	Unknown	8.6.3 Carcinoma of liver and intrahepatic bile ducts	VII(b) Hepatic carcinomas	Radiography without microscopic confirm	IIIA	T3	N0	M0	Blank(s)	Blank(s)	Blank(s)	Blank(s)	Blank(s)	Regional	0	None	None; diagnosed at autopsy	999	999	Blank(s)	Blank(s)	Blank(s)	Blank(s)	Blank(s)	Blank(s)	Blank(s)	Blank(s)	Blank(s)	Blank(s)	Blank(s)	Blank(s)	Blank(s)	988	0	98	Blank(s)	Liver	N/A not first tumor	N/A not first tumor	0
Insured	Unmarried or Domestic Partner	77	1936	2014	August	Female	White	C22.0-Liver	8170/3: Hepatocellular carcinoma, NOS	Unknown	8.6.3 Carcinoma of liver and intrahepatic bile ducts	VII(b) Hepatic carcinomas	Positive histology	II	T2	N0	M0	Blank(s)	Blank(s)	Blank(s)	Blank(s)	Blank(s)	Regional	0	None	None; diagnosed at autopsy	10	1	Blank(s)	Blank(s)	Blank(s)	Blank(s)	Blank(s)	Blank(s)	Blank(s)	Blank(s)	Blank(s)	Blank(s)	Blank(s)	Blank(s)	Blank(s)	988	0	98	Blank(s)	Alive	N/A not first tumor	N/A not first tumor	26
Insured	Divorced	74	1938	2013	April	Male	White	C22.0-Liver	8170/3: Hepatocellular carcinoma, NOS	Unknown	8.6.3 Carcinoma of liver and intrahepatic bile ducts	VII(b) Hepatic carcinomas	Positive histology	IV	T3	N0	M1	Blank(s)	Blank(s)	Blank(s)	Blank(s)	Blank(s)	Distant	0	None	None; diagnosed at autopsy	10	999	Blank(s)	Blank(s)	Blank(s)	Blank(s)	Blank(s)	Blank(s)	Blank(s)	Blank(s)	Blank(s)	Blank(s)	Blank(s)	Blank(s)	Blank(s)	988	0	98	Blank(s)	Liver	N/A not first tumor	N/A not first tumor	0
Blank(s)	Married (including common law)	78	1927	2006	October	Male	White	C22.0-Liver	8170/3: Hepatocellular carcinoma, NOS	Unknown	8.6.3 Carcinoma of liver and intrahepatic bile ducts	VII(b) Hepatic carcinomas	Clinical diagnosis only	I	T1	N0	M0	Blank(s)	Blank(s)	Blank(s)	Blank(s)	Blank(s)	Localized	0	None	None; diagnosed at autopsy	10	1	Blank(s)	Blank(s)	Blank(s)	Blank(s)	Blank(s)	Blank(s)	Blank(s)	Blank(s)	Blank(s)	Blank(s)	Blank(s)	Blank(s)	Blank(s)	988	0	98	Blank(s)	Liver	N/A not first tumor	N/A not first tumor	1
Insured	Married (including common law)	73	1940	2014	February	Male	White	C22.0-Liver	8170/3: Hepatocellular carcinoma, NOS	Moderately differentiated; Grade II	8.6.3 Carcinoma of liver and intrahepatic bile ducts	VII(b) Hepatic carcinomas	Positive histology	II	T2	N0	M0	Blank(s)	Blank(s)	Blank(s)	Blank(s)	Blank(s)	Regional	0	None	None; diagnosed at autopsy	10	999	Blank(s)	Blank(s)	Blank(s)	Blank(s)	Blank(s)	Blank(s)	Blank(s)	Blank(s)	Blank(s)	Blank(s)	Blank(s)	Blank(s)	Blank(s)	988	0	98	Blank(s)	Liver	N/A not first tumor	N/A not first tumor	11
Any Medicaid	Single (never married)	60	1951	2011	December	Female	White	C22.0-Liver	8170/3: Hepatocellular carcinoma, NOS	Well differentiated; Grade I	8.6.3 Carcinoma of liver and intrahepatic bile ducts	VII(b) Hepatic carcinomas	Positive histology	II	T2	N0	M0	Blank(s)	Blank(s)	Blank(s)	Blank(s)	Blank(s)	Regional	16	None	None; diagnosed at autopsy	10	1	Blank(s)	Blank(s)	Blank(s)	Blank(s)	Blank(s)	Blank(s)	Blank(s)	Blank(s)	Blank(s)	Blank(s)	Blank(s)	Blank(s)	Blank(s)	988	0	98	Blank(s)	Alive	N/A not first tumor	N/A not first tumor	60
Blank(s)	Married (including common law)	51	1954	2005	June	Male	Other (American Indian/AK Native, Asian/Pacific Islander)	C22.0-Liver	8170/3: Hepatocellular carcinoma, NOS	Well differentiated; Grade I	8.6.3 Carcinoma of liver and intrahepatic bile ducts	VII(b) Hepatic carcinomas	Positive histology	I	T1	N0	M0	Blank(s)	Blank(s)	Blank(s)	Blank(s)	Blank(s)	Localized	16	None	None; diagnosed at autopsy	10	999	Blank(s)	Blank(s)	Blank(s)	Blank(s)	Blank(s)	Blank(s)	Blank(s)	Blank(s)	Blank(s)	Blank(s)	Blank(s)	Blank(s)	Blank(s)	988	0	98	Blank(s)	Stomach	N/A not first tumor	N/A not first tumor	28
Insured/No specifics	Married (including common law)	85	1927	2012	April	Male	White	C22.0-Liver	8010/3: Carcinoma, NOS	Poorly differentiated; Grade III	8.6.3 Carcinoma of liver and intrahepatic bile ducts	VII(b) Hepatic carcinomas	Positive histology	IIIC	T3	N1	M0	Blank(s)	Blank(s)	Blank(s)	Blank(s)	Blank(s)	Regional	0	None	None; diagnosed at autopsy	10	999	Blank(s)	Blank(s)	Blank(s)	Blank(s)	Blank(s)	Blank(s)	Blank(s)	Blank(s)	Blank(s)	Blank(s)	Blank(s)	Blank(s)	Blank(s)	988	0	98	Blank(s)	Liver	N/A not first tumor	N/A not first tumor	2
Insured	Married (including common law)	56	1957	2013	December	Male	White	C22.0-Liver	8170/3: Hepatocellular carcinoma, NOS	Unknown	8.6.3 Carcinoma of liver and intrahepatic bile ducts	VII(b) Hepatic carcinomas	Positive histology	IV	T1	N0	M1	Blank(s)	Blank(s)	Blank(s)	Blank(s)	Blank(s)	Distant	0	None	None; diagnosed at autopsy	10	1	Blank(s)	Blank(s)	Blank(s)	Blank(s)	Blank(s)	Blank(s)	Blank(s)	Blank(s)	Blank(s)	Blank(s)	Blank(s)	Blank(s)	Blank(s)	988	0	98	Blank(s)	Liver	N/A not first tumor	N/A not first tumor	4
Insured	Unknown	75	1936	2012	March	Male	White	C22.1-Intrahepatic bile duct	8160/3: Cholangiocarcinoma	Poorly differentiated; Grade III	8.6.3 Carcinoma of liver and intrahepatic bile ducts	VII(b) Hepatic carcinomas	Positive histology	IIIA	T3	N0	M0	Blank(s)	Blank(s)	Blank(s)	Blank(s)	Blank(s)	Regional	52	1 to 3 regional lymph nodes removed	None; diagnosed at autopsy	20	0	Blank(s)	Blank(s)	Blank(s)	Blank(s)	Blank(s)	Blank(s)	Blank(s)	Blank(s)	Blank(s)	Blank(s)	Blank(s)	Blank(s)	Blank(s)	988	2	0	Blank(s)	Intrahepatic Bile Duct	N/A not first tumor	N/A not first tumor	34
Blank(s)	Single (never married)	53	1951	2005	February	Male	Black	C22.0-Liver	8140/3: Adenocarcinoma, NOS	Unknown	8.6.3 Carcinoma of liver and intrahepatic bile ducts	VII(b) Hepatic carcinomas	Positive histology	UNK Stage	TX	NX	MX	Blank(s)	Blank(s)	Blank(s)	Blank(s)	Blank(s)	Unknown/unstaged	0	Unknown or not applicable	None; diagnosed at autopsy	999	999	Blank(s)	Blank(s)	Blank(s)	Blank(s)	Blank(s)	Blank(s)	Blank(s)	Blank(s)	Blank(s)	Blank(s)	Blank(s)	Blank(s)	Blank(s)	988	99	99	Blank(s)	Liver	N/A not first tumor	N/A not first tumor	69
Insurance status unknown	Married (including common law)	86	1927	2013	October	Male	White	C22.0-Liver	8170/3: Hepatocellular carcinoma, NOS	Unknown	8.6.3 Carcinoma of liver and intrahepatic bile ducts	VII(b) Hepatic carcinomas	Unknown	UNK Stage	TX	NX	MX	Blank(s)	Blank(s)	Blank(s)	Blank(s)	Blank(s)	Unknown/unstaged	99	Unknown or not applicable	Unknown; death certificate only	999	999	Blank(s)	Blank(s)	Blank(s)	Blank(s)	Blank(s)	Blank(s)	Blank(s)	Blank(s)	Blank(s)	Blank(s)	Blank(s)	Blank(s)	Blank(s)	988	99	99	Blank(s)	Liver	N/A not first tumor	N/A not first tumor	Unknown
Insured	Married (including common law)	66	1944	2010	November	Male	White	C22.0-Liver	8170/3: Hepatocellular carcinoma, NOS	Moderately differentiated; Grade II	8.6.3 Carcinoma of liver and intrahepatic bile ducts	VII(b) Hepatic carcinomas	Positive exfoliative cytology, no positive histology	IIIA	T3	N0	M0	Blank(s)	Blank(s)	Blank(s)	Blank(s)	Blank(s)	Regional	0	None	None; diagnosed at autopsy	10	1	Blank(s)	Blank(s)	Blank(s)	Blank(s)	Blank(s)	Blank(s)	Blank(s)	Blank(s)	Blank(s)	Blank(s)	Blank(s)	Blank(s)	Blank(s)	988	0	98	Blank(s)	Liver	N/A not first tumor	N/A not first tumor	17
Insured	Divorced	63	1948	2011	June	Female	Other (American Indian/AK Native, Asian/Pacific Islander)	C22.1-Intrahepatic bile duct	8140/3: Adenocarcinoma, NOS	Unknown	8.6.3 Carcinoma of liver and intrahepatic bile ducts	VII(b) Hepatic carcinomas	Positive histology	IV	T1	N0	M1	Blank(s)	Blank(s)	Blank(s)	Blank(s)	Blank(s)	Distant	0	None	None; diagnosed at autopsy	999	999	Blank(s)	Blank(s)	Blank(s)	Blank(s)	Blank(s)	Blank(s)	Blank(s)	Blank(s)	Blank(s)	Blank(s)	Blank(s)	Blank(s)	Blank(s)	988	0	98	Blank(s)	Intrahepatic Bile Duct	N/A not first tumor	N/A not first tumor	11
Any Medicaid	Married (including common law)	75	1933	2009	November	Male	Other (American Indian/AK Native, Asian/Pacific Islander)	C22.0-Liver	8170/3: Hepatocellular carcinoma, NOS	Well differentiated; Grade I	8.6.3 Carcinoma of liver and intrahepatic bile ducts	VII(b) Hepatic carcinomas	Positive histology	II	T2	N0	M0	Blank(s)	Blank(s)	Blank(s)	Blank(s)	Blank(s)	Localized	0	None	None; diagnosed at autopsy	20	999	Blank(s)	Blank(s)	Blank(s)	Blank(s)	Blank(s)	Blank(s)	Blank(s)	Blank(s)	Blank(s)	Blank(s)	Blank(s)	Blank(s)	Blank(s)	988	0	98	Blank(s)	State DC not available or state DC available but no COD	N/A not first tumor	N/A not first tumor	23
Any Medicaid	Married (including common law)	88	1923	2012	February	Male	Other (American Indian/AK Native, Asian/Pacific Islander)	C22.0-Liver	8170/3: Hepatocellular carcinoma, NOS	Moderately differentiated; Grade II	8.6.3 Carcinoma of liver and intrahepatic bile ducts	VII(b) Hepatic carcinomas	Positive histology	II	T2	N0	M0	Blank(s)	Blank(s)	Blank(s)	Blank(s)	Blank(s)	Localized	0	None	None; diagnosed at autopsy	10	999	Blank(s)	Blank(s)	Blank(s)	Blank(s)	Blank(s)	Blank(s)	Blank(s)	Blank(s)	Blank(s)	Blank(s)	Blank(s)	Blank(s)	Blank(s)	988	0	98	Blank(s)	Liver	N/A not first tumor	N/A not first tumor	4
Insured	Married (including common law)	72	1939	2012	May	Male	White	C22.0-Liver	8170/3: Hepatocellular carcinoma, NOS	Unknown	8.6.3 Carcinoma of liver and intrahepatic bile ducts	VII(b) Hepatic carcinomas	Positive histology	IIIA	T3	N0	M0	Blank(s)	Blank(s)	Blank(s)	Blank(s)	Blank(s)	Regional	16	None	None; diagnosed at autopsy	20	0	Blank(s)	Blank(s)	Blank(s)	Blank(s)	Blank(s)	Blank(s)	Blank(s)	Blank(s)	Blank(s)	Blank(s)	Blank(s)	Blank(s)	Blank(s)	988	0	98	Blank(s)	Urinary Bladder	N/A not first tumor	N/A not first tumor	32
Blank(s)	Married (including common law)	63	1940	2004	January	Male	Other (American Indian/AK Native, Asian/Pacific Islander)	C22.0-Liver	8170/3: Hepatocellular carcinoma, NOS	Unknown	8.6.3 Carcinoma of liver and intrahepatic bile ducts	VII(b) Hepatic carcinomas	Radiography without microscopic confirm	II	T2	N0	M0	Blank(s)	Blank(s)	Blank(s)	Blank(s)	Blank(s)	Localized	0	None	None; diagnosed at autopsy	20	1	Blank(s)	Blank(s)	Blank(s)	Blank(s)	Blank(s)	Blank(s)	Blank(s)	Blank(s)	Blank(s)	Blank(s)	Blank(s)	Blank(s)	Blank(s)	988	0	98	Blank(s)	Alive	N/A not first tumor	N/A not first tumor	155
Insured	Married (including common law)	80	1927	2008	May	Male	White	C22.0-Liver	8174/3: Hepatocellular carcinoma, clear cell type	Unknown	8.6.3 Carcinoma of liver and intrahepatic bile ducts	VII(b) Hepatic carcinomas	Positive histology	IIIB	T4	N0	M0	Blank(s)	Blank(s)	Blank(s)	Blank(s)	Blank(s)	Distant	0	None	None; diagnosed at autopsy	10	999	Blank(s)	Blank(s)	Blank(s)	Blank(s)	Blank(s)	Blank(s)	Blank(s)	Blank(s)	Blank(s)	Blank(s)	Blank(s)	Blank(s)	Blank(s)	988	0	98	Blank(s)	Diseases of Heart	N/A not first tumor	N/A not first tumor	5
Insured	Married (including common law)	81	1931	2013	April	Male	Black	C22.0-Liver	8170/3: Hepatocellular carcinoma, NOS	Unknown	8.6.3 Carcinoma of liver and intrahepatic bile ducts	VII(b) Hepatic carcinomas	Radiography without microscopic confirm	I	T1	N0	M0	Blank(s)	Blank(s)	Blank(s)	Blank(s)	Blank(s)	Localized	0	None	None; diagnosed at autopsy	10	999	Blank(s)	Blank(s)	Blank(s)	Blank(s)	Blank(s)	Blank(s)	Blank(s)	Blank(s)	Blank(s)	Blank(s)	Blank(s)	Blank(s)	Blank(s)	988	0	98	Blank(s)	Lung and Bronchus	N/A not first tumor	N/A not first tumor	23
Insured	Married (including common law)	76	1935	2011	November	Male	White	C22.1-Intrahepatic bile duct	8160/3: Cholangiocarcinoma	Unknown	8.6.3 Carcinoma of liver and intrahepatic bile ducts	VII(b) Hepatic carcinomas	Positive exfoliative cytology, no positive histology	IIIA	T3	N0	M0	Blank(s)	Blank(s)	Blank(s)	Blank(s)	Blank(s)	Regional	0	None	None; diagnosed at autopsy	998	999	Blank(s)	Blank(s)	Blank(s)	Blank(s)	Blank(s)	Blank(s)	Blank(s)	Blank(s)	Blank(s)	Blank(s)	Blank(s)	Blank(s)	Blank(s)	988	0	98	Blank(s)	Intrahepatic Bile Duct	N/A not first tumor	N/A not first tumor	6
Insurance status unknown	Widowed	89	1922	2012	May	Male	Other (American Indian/AK Native, Asian/Pacific Islander)	C22.0-Liver	8000/3: Neoplasm, malignant	Unknown	10 Unspecified Malignant Neoplasms	VII(c) Unspecified malignant hepatic tumors	Unknown	UNK Stage	TX	NX	MX	Blank(s)	Blank(s)	Blank(s)	Blank(s)	Blank(s)	Unknown/unstaged	99	Unknown or not applicable	Unknown; death certificate only	999	999	Blank(s)	Blank(s)	Blank(s)	Blank(s)	Blank(s)	Blank(s)	Blank(s)	Blank(s)	Blank(s)	Blank(s)	Blank(s)	Blank(s)	Blank(s)	988	99	99	Blank(s)	Liver	N/A not first tumor	N/A not first tumor	Unknown
Blank(s)	Married (including common law)	64	1939	2004	August	Female	Other (American Indian/AK Native, Asian/Pacific Islander)	C22.0-Liver	8170/3: Hepatocellular carcinoma, NOS	Unknown	8.6.3 Carcinoma of liver and intrahepatic bile ducts	VII(b) Hepatic carcinomas	Positive histology	UNK Stage	T1	N0	MX	Blank(s)	Blank(s)	Blank(s)	Blank(s)	Blank(s)	Localized	16	None	None; diagnosed at autopsy	998	999	Blank(s)	Blank(s)	Blank(s)	Blank(s)	Blank(s)	Blank(s)	Blank(s)	Blank(s)	Blank(s)	Blank(s)	Blank(s)	Blank(s)	Blank(s)	988	0	98	Blank(s)	State DC not available or state DC available but no COD	N/A not first tumor	N/A not first tumor	10
Insured	Married (including common law)	88	1923	2011	May	Male	White	C22.0-Liver	8170/3: Hepatocellular carcinoma, NOS	Poorly differentiated; Grade III	8.6.3 Carcinoma of liver and intrahepatic bile ducts	VII(b) Hepatic carcinomas	Positive histology	IIIA	T3	N0	M0	Blank(s)	Blank(s)	Blank(s)	Blank(s)	Blank(s)	Localized	0	None	None; diagnosed at autopsy	999	999	Blank(s)	Blank(s)	Blank(s)	Blank(s)	Blank(s)	Blank(s)	Blank(s)	Blank(s)	Blank(s)	Blank(s)	Blank(s)	Blank(s)	Blank(s)	988	0	98	Blank(s)	Liver	N/A not first tumor	N/A not first tumor	10
Insured	Single (never married)	66	1946	2012	September	Male	Black	C22.0-Liver	8170/3: Hepatocellular carcinoma, NOS	Unknown	8.6.3 Carcinoma of liver and intrahepatic bile ducts	VII(b) Hepatic carcinomas	Radiography without microscopic confirm	I	T1	N0	M0	Blank(s)	Blank(s)	Blank(s)	Blank(s)	Blank(s)	Localized	0	None	None; diagnosed at autopsy	998	999	Blank(s)	Blank(s)	Blank(s)	Blank(s)	Blank(s)	Blank(s)	Blank(s)	Blank(s)	Blank(s)	Blank(s)	Blank(s)	Blank(s)	Blank(s)	988	0	98	Blank(s)	Lung and Bronchus	N/A not first tumor	N/A not first tumor	38
Insured	Unknown	68	1942	2010	December	Female	White	C22.1-Intrahepatic bile duct	8160/3: Cholangiocarcinoma	Unknown	8.6.3 Carcinoma of liver and intrahepatic bile ducts	VII(b) Hepatic carcinomas	Positive histology	UNK Stage	TX	N0	M0	Blank(s)	Blank(s)	Blank(s)	Blank(s)	Blank(s)	Unknown/unstaged	0	None	None; diagnosed at autopsy	20	999	Blank(s)	Blank(s)	Blank(s)	Blank(s)	Blank(s)	Blank(s)	Blank(s)	Blank(s)	Blank(s)	Blank(s)	Blank(s)	Blank(s)	Blank(s)	988	0	98	Blank(s)	Intrahepatic Bile Duct	N/A not first tumor	N/A not first tumor	1
Insured/No specifics	Married (including common law)	82	1931	2013	December	Male	White	C22.0-Liver	8170/3: Hepatocellular carcinoma, NOS	Unknown	8.6.3 Carcinoma of liver and intrahepatic bile ducts	VII(b) Hepatic carcinomas	Positive histology	UNK Stage	TX	NX	M0	Blank(s)	Blank(s)	Blank(s)	Blank(s)	Blank(s)	Unknown/unstaged	0	None	None; diagnosed at autopsy	999	999	Blank(s)	Blank(s)	Blank(s)	Blank(s)	Blank(s)	Blank(s)	Blank(s)	Blank(s)	Blank(s)	Blank(s)	Blank(s)	Blank(s)	Blank(s)	988	0	98	Blank(s)	Liver	N/A not first tumor	N/A not first tumor	11
Insured	Single (never married)	73	1935	2009	April	Male	White	C22.1-Intrahepatic bile duct	8160/3: Cholangiocarcinoma	Moderately differentiated; Grade II	8.6.3 Carcinoma of liver and intrahepatic bile ducts	VII(b) Hepatic carcinomas	Positive histology	IIIC	T3	N1	M0	Blank(s)	Blank(s)	Blank(s)	Blank(s)	Blank(s)	Regional	0	None	None; diagnosed at autopsy	20	999	Blank(s)	Blank(s)	Blank(s)	Blank(s)	Blank(s)	Blank(s)	Blank(s)	Blank(s)	Blank(s)	Blank(s)	Blank(s)	Blank(s)	Blank(s)	988	0	98	Blank(s)	Intrahepatic Bile Duct	N/A not first tumor	N/A not first tumor	36
Blank(s)	Married (including common law)	74	1929	2004	April	Male	White	C22.0-Liver	8170/3: Hepatocellular carcinoma, NOS	Unknown	8.6.3 Carcinoma of liver and intrahepatic bile ducts	VII(b) Hepatic carcinomas	Positive histology	I	T1	N0	M0	Blank(s)	Blank(s)	Blank(s)	Blank(s)	Blank(s)	Localized	16	None	None; diagnosed at autopsy	20	999	Blank(s)	Blank(s)	Blank(s)	Blank(s)	Blank(s)	Blank(s)	Blank(s)	Blank(s)	Blank(s)	Blank(s)	Blank(s)	Blank(s)	Blank(s)	988	0	98	Blank(s)	Urinary Bladder	N/A not first tumor	N/A not first tumor	76
Insured	Married (including common law)	54	1955	2009	December	Male	White	C22.1-Intrahepatic bile duct	8160/3: Cholangiocarcinoma	Moderately differentiated; Grade II	8.6.3 Carcinoma of liver and intrahepatic bile ducts	VII(b) Hepatic carcinomas	Positive histology	I	T1	N0	M0	Blank(s)	Blank(s)	Blank(s)	Blank(s)	Blank(s)	Localized	0	None	None; diagnosed at autopsy	999	999	Blank(s)	Blank(s)	Blank(s)	Blank(s)	Blank(s)	Blank(s)	Blank(s)	Blank(s)	Blank(s)	Blank(s)	Blank(s)	Blank(s)	Blank(s)	988	0	98	Blank(s)	Non-Hodgkin Lymphoma	N/A not first tumor	N/A not first tumor	35
Any Medicaid	Married (including common law)	51	1960	2012	March	Female	Other (American Indian/AK Native, Asian/Pacific Islander)	C22.1-Intrahepatic bile duct	8140/3: Adenocarcinoma, NOS	Unknown	8.6.3 Carcinoma of liver and intrahepatic bile ducts	VII(b) Hepatic carcinomas	Positive histology	IV	TX	N0	M1	Blank(s)	Blank(s)	Blank(s)	Blank(s)	Blank(s)	Distant	0	None	Non-primary surgical procedure to distant site	998	999	Blank(s)	Blank(s)	Blank(s)	Blank(s)	Blank(s)	Blank(s)	Blank(s)	Blank(s)	Blank(s)	Blank(s)	Blank(s)	Blank(s)	Blank(s)	988	0	98	Blank(s)	Breast	N/A not first tumor	N/A not first tumor	2
Any Medicaid	Single (never married)	61	1947	2009	March	Male	Black	C22.0-Liver	8170/3: Hepatocellular carcinoma, NOS	Unknown	8.6.3 Carcinoma of liver and intrahepatic bile ducts	VII(b) Hepatic carcinomas	Positive histology	II	T2	N0	M0	Blank(s)	Blank(s)	Blank(s)	Blank(s)	Blank(s)	Regional	0	None	None; diagnosed at autopsy	998	999	Blank(s)	Blank(s)	Blank(s)	Blank(s)	Blank(s)	Blank(s)	Blank(s)	Blank(s)	Blank(s)	Blank(s)	Blank(s)	Blank(s)	Blank(s)	988	0	98	Blank(s)	Liver	N/A not first tumor	N/A not first tumor	12
Blank(s)	Married (including common law)	88	1917	2006	January	Male	White	C22.0-Liver	8170/3: Hepatocellular carcinoma, NOS	Unknown	8.6.3 Carcinoma of liver and intrahepatic bile ducts	VII(b) Hepatic carcinomas	Positive exfoliative cytology, no positive histology	IV	T3	N0	M1	Blank(s)	Blank(s)	Blank(s)	Blank(s)	Blank(s)	Distant	0	None	None; diagnosed at autopsy	998	0	Blank(s)	Blank(s)	Blank(s)	Blank(s)	Blank(s)	Blank(s)	Blank(s)	Blank(s)	Blank(s)	Blank(s)	Blank(s)	Blank(s)	Blank(s)	988	0	98	Blank(s)	Liver	N/A not first tumor	N/A not first tumor	1
Insured	Married (including common law)	63	1950	2014	January	Female	Other (American Indian/AK Native, Asian/Pacific Islander)	C22.0-Liver	8170/3: Hepatocellular carcinoma, NOS	Moderately differentiated; Grade II	8.6.3 Carcinoma of liver and intrahepatic bile ducts	VII(b) Hepatic carcinomas	Positive histology	I	T1	N0	M0	Blank(s)	Blank(s)	Blank(s)	Blank(s)	Blank(s)	Localized	24	None	None; diagnosed at autopsy	10	0	Blank(s)	Blank(s)	Blank(s)	Blank(s)	Blank(s)	Blank(s)	Blank(s)	Blank(s)	Blank(s)	Blank(s)	Blank(s)	Blank(s)	Blank(s)	988	0	98	Blank(s)	Alive	N/A not first tumor	N/A not first tumor	35
Insured	Married (including common law)	64	1944	2009	March	Male	Black	C22.0-Liver	8170/3: Hepatocellular carcinoma, NOS	Unknown	8.6.3 Carcinoma of liver and intrahepatic bile ducts	VII(b) Hepatic carcinomas	Radiography without microscopic confirm	I	T1	N0	M0	Blank(s)	Blank(s)	Blank(s)	Blank(s)	Blank(s)	Localized	0	None	None; diagnosed at autopsy	10	999	Blank(s)	Blank(s)	Blank(s)	Blank(s)	Blank(s)	Blank(s)	Blank(s)	Blank(s)	Blank(s)	Blank(s)	Blank(s)	Blank(s)	Blank(s)	988	0	98	Blank(s)	Liver	N/A not first tumor	N/A not first tumor	1
Any Medicaid	Single (never married)	64	1944	2008	September	Female	White	C22.0-Liver	8170/3: Hepatocellular carcinoma, NOS	Unknown	8.6.3 Carcinoma of liver and intrahepatic bile ducts	VII(b) Hepatic carcinomas	Positive laboratory test/marker study	I	T1	N0	M0	Blank(s)	Blank(s)	Blank(s)	Blank(s)	Blank(s)	Localized	0	None	None; diagnosed at autopsy	10	999	Blank(s)	Blank(s)	Blank(s)	Blank(s)	Blank(s)	Blank(s)	Blank(s)	Blank(s)	Blank(s)	Blank(s)	Blank(s)	Blank(s)	Blank(s)	988	0	98	Blank(s)	Alive	N/A not first tumor	N/A not first tumor	99
Blank(s)	Married (including common law)	77	1927	2004	November	Male	White	C22.0-Liver	8170/3: Hepatocellular carcinoma, NOS	Unknown	8.6.3 Carcinoma of liver and intrahepatic bile ducts	VII(b) Hepatic carcinomas	Unknown	UNK Stage	TX	NX	MX	Blank(s)	Blank(s)	Blank(s)	Blank(s)	Blank(s)	Unknown/unstaged	0	Unknown or not applicable	Unknown; death certificate only	999	999	Blank(s)	Blank(s)	Blank(s)	Blank(s)	Blank(s)	Blank(s)	Blank(s)	Blank(s)	Blank(s)	Blank(s)	Blank(s)	Blank(s)	Blank(s)	988	99	99	Blank(s)	Liver	N/A not first tumor	N/A not first tumor	12
Blank(s)	Single (never married)	62	1943	2005	March	Male	White	C22.0-Liver	8170/3: Hepatocellular carcinoma, NOS	Unknown	8.6.3 Carcinoma of liver and intrahepatic bile ducts	VII(b) Hepatic carcinomas	Positive histology	UNK Stage	TX	N0	M0	Blank(s)	Blank(s)	Blank(s)	Blank(s)	Blank(s)	Regional	0	None	None; diagnosed at autopsy	10	999	Blank(s)	Blank(s)	Blank(s)	Blank(s)	Blank(s)	Blank(s)	Blank(s)	Blank(s)	Blank(s)	Blank(s)	Blank(s)	Blank(s)	Blank(s)	988	0	98	Blank(s)	Liver	N/A not first tumor	N/A not first tumor	1
Insured/No specifics	Single (never married)	54	1957	2011	November	Male	White	C22.0-Liver	8170/3: Hepatocellular carcinoma, NOS	Unknown	8.6.3 Carcinoma of liver and intrahepatic bile ducts	VII(b) Hepatic carcinomas	Positive laboratory test/marker study	IIIA	T3	N0	M0	Blank(s)	Blank(s)	Blank(s)	Blank(s)	Blank(s)	Regional	0	None	None; diagnosed at autopsy	10	1	Blank(s)	Blank(s)	Blank(s)	Blank(s)	Blank(s)	Blank(s)	Blank(s)	Blank(s)	Blank(s)	Blank(s)	Blank(s)	Blank(s)	Blank(s)	988	0	98	Blank(s)	Liver	N/A not first tumor	N/A not first tumor	0
Any Medicaid	Married (including common law)	86	1922	2008	November	Male	Other (American Indian/AK Native, Asian/Pacific Islander)	C22.0-Liver	8170/3: Hepatocellular carcinoma, NOS	Poorly differentiated; Grade III	8.6.3 Carcinoma of liver and intrahepatic bile ducts	VII(b) Hepatic carcinomas	Positive histology	I	T1	N0	M0	Blank(s)	Blank(s)	Blank(s)	Blank(s)	Blank(s)	Localized	0	None	None; diagnosed at autopsy	998	999	Blank(s)	Blank(s)	Blank(s)	Blank(s)	Blank(s)	Blank(s)	Blank(s)	Blank(s)	Blank(s)	Blank(s)	Blank(s)	Blank(s)	Blank(s)	988	0	98	Blank(s)	Liver	N/A not first tumor	N/A not first tumor	1
Insured	Married (including common law)	78	1931	2009	December	Male	White	C22.1-Intrahepatic bile duct	8160/3: Cholangiocarcinoma	Unknown	8.6.3 Carcinoma of liver and intrahepatic bile ducts	VII(b) Hepatic carcinomas	Positive histology	IIIA	T3	N0	M0	Blank(s)	Blank(s)	Blank(s)	Blank(s)	Blank(s)	Localized	0	None	None; diagnosed at autopsy	20	999	Blank(s)	Blank(s)	Blank(s)	Blank(s)	Blank(s)	Blank(s)	Blank(s)	Blank(s)	Blank(s)	Blank(s)	Blank(s)	Blank(s)	Blank(s)	988	0	98	Blank(s)	Intrahepatic Bile Duct	N/A not first tumor	N/A not first tumor	2
Insured	Married (including common law)	73	1934	2007	November	Male	White	C22.0-Liver	8170/3: Hepatocellular carcinoma, NOS	Unknown	8.6.3 Carcinoma of liver and intrahepatic bile ducts	VII(b) Hepatic carcinomas	Positive histology	IV	TX	NX	M1	Blank(s)	Blank(s)	Blank(s)	Blank(s)	Blank(s)	Distant	0	None	None; diagnosed at autopsy	20	1	Blank(s)	Blank(s)	Blank(s)	Blank(s)	Blank(s)	Blank(s)	Blank(s)	Blank(s)	Blank(s)	Blank(s)	Blank(s)	Blank(s)	Blank(s)	988	0	98	Blank(s)	Liver	N/A not first tumor	N/A not first tumor	10
Insured	Divorced	63	1945	2008	December	Male	Black	C22.0-Liver	8170/3: Hepatocellular carcinoma, NOS	Unknown	8.6.3 Carcinoma of liver and intrahepatic bile ducts	VII(b) Hepatic carcinomas	Unknown	UNK Stage	TX	NX	MX	Blank(s)	Blank(s)	Blank(s)	Blank(s)	Blank(s)	Unknown/unstaged	0	None	None; diagnosed at autopsy	999	999	Blank(s)	Blank(s)	Blank(s)	Blank(s)	Blank(s)	Blank(s)	Blank(s)	Blank(s)	Blank(s)	Blank(s)	Blank(s)	Blank(s)	Blank(s)	988	0	98	Blank(s)	Liver	N/A not first tumor	N/A not first tumor	3
Insured	Married (including common law)	91	1921	2012	Blank(s)	Male	Other (American Indian/AK Native, Asian/Pacific Islander)	C22.0-Liver	8170/3: Hepatocellular carcinoma, NOS	Unknown	8.6.3 Carcinoma of liver and intrahepatic bile ducts	VII(b) Hepatic carcinomas	Radiography without microscopic confirm	UNK Stage	TX	NX	MX	Blank(s)	Blank(s)	Blank(s)	Blank(s)	Blank(s)	Unknown/unstaged	0	None	None; diagnosed at autopsy	999	999	Blank(s)	Blank(s)	Blank(s)	Blank(s)	Blank(s)	Blank(s)	Blank(s)	Blank(s)	Blank(s)	Blank(s)	Blank(s)	Blank(s)	Blank(s)	988	0	98	Blank(s)	Cerebrovascular Diseases	N/A not first tumor	N/A not first tumor	1
Insured	Married (including common law)	85	1929	2014	October	Female	White	C22.0-Liver	8170/3: Hepatocellular carcinoma, NOS	Unknown	8.6.3 Carcinoma of liver and intrahepatic bile ducts	VII(b) Hepatic carcinomas	Positive histology	IIIA	T3	N0	M0	Blank(s)	Blank(s)	Blank(s)	Blank(s)	Blank(s)	Localized	0	None	None; diagnosed at autopsy	10	999	Blank(s)	Blank(s)	Blank(s)	Blank(s)	Blank(s)	Blank(s)	Blank(s)	Blank(s)	Blank(s)	Blank(s)	Blank(s)	Blank(s)	Blank(s)	988	0	98	Blank(s)	Miscellaneous Malignant Cancer	N/A not first tumor	N/A not first tumor	7
Insured/No specifics	Married (including common law)	74	1933	2007	August	Female	White	C22.1-Intrahepatic bile duct	8160/3: Cholangiocarcinoma	Unknown	8.6.3 Carcinoma of liver and intrahepatic bile ducts	VII(b) Hepatic carcinomas	Positive histology	UNK Stage	T3	NX	MX	Blank(s)	Blank(s)	Blank(s)	Blank(s)	Blank(s)	Regional	0	None	None; diagnosed at autopsy	998	999	Blank(s)	Blank(s)	Blank(s)	Blank(s)	Blank(s)	Blank(s)	Blank(s)	Blank(s)	Blank(s)	Blank(s)	Blank(s)	Blank(s)	Blank(s)	988	0	98	Blank(s)	Intrahepatic Bile Duct	N/A not first tumor	N/A not first tumor	9
Insured	Unknown	87	1926	2013	November	Male	White	C22.1-Intrahepatic bile duct	8160/3: Cholangiocarcinoma	Unknown	8.6.3 Carcinoma of liver and intrahepatic bile ducts	VII(b) Hepatic carcinomas	Positive histology	II	T2	N0	M0	Blank(s)	Blank(s)	Blank(s)	Blank(s)	Blank(s)	Localized	0	None	None; diagnosed at autopsy	999	999	Blank(s)	Blank(s)	Blank(s)	Blank(s)	Blank(s)	Blank(s)	Blank(s)	Blank(s)	Blank(s)	Blank(s)	Blank(s)	Blank(s)	Blank(s)	988	0	98	Blank(s)	Intrahepatic Bile Duct	N/A not first tumor	N/A not first tumor	1
Insured/No specifics	Married (including common law)	78	1931	2010	April	Male	Other (American Indian/AK Native, Asian/Pacific Islander)	C22.0-Liver	8170/3: Hepatocellular carcinoma, NOS	Well differentiated; Grade I	8.6.3 Carcinoma of liver and intrahepatic bile ducts	VII(b) Hepatic carcinomas	Positive exfoliative cytology, no positive histology	IIIB	T4	N0	M0	Blank(s)	Blank(s)	Blank(s)	Blank(s)	Blank(s)	Regional	0	None	None; diagnosed at autopsy	10	1	Blank(s)	Blank(s)	Blank(s)	Blank(s)	Blank(s)	Blank(s)	Blank(s)	Blank(s)	Blank(s)	Blank(s)	Blank(s)	Blank(s)	Blank(s)	988	0	98	Blank(s)	Liver	N/A not first tumor	N/A not first tumor	3
Blank(s)	Divorced	57	1947	2005	June	Female	White	C22.0-Liver	8170/3: Hepatocellular carcinoma, NOS	Unknown	8.6.3 Carcinoma of liver and intrahepatic bile ducts	VII(b) Hepatic carcinomas	Clinical diagnosis only	UNK Stage	TX	NX	MX	Blank(s)	Blank(s)	Blank(s)	Blank(s)	Blank(s)	Unknown/unstaged	0	Unknown or not applicable	None; diagnosed at autopsy	999	999	Blank(s)	Blank(s)	Blank(s)	Blank(s)	Blank(s)	Blank(s)	Blank(s)	Blank(s)	Blank(s)	Blank(s)	Blank(s)	Blank(s)	Blank(s)	988	99	99	Blank(s)	Liver	N/A not first tumor	N/A not first tumor	0
Insured	Single (never married)	86	1924	2011	February	Female	Black	C22.0-Liver	8170/3: Hepatocellular carcinoma, NOS	Well differentiated; Grade I	8.6.3 Carcinoma of liver and intrahepatic bile ducts	VII(b) Hepatic carcinomas	Positive histology	IIIA	T3	N0	M0	Blank(s)	Blank(s)	Blank(s)	Blank(s)	Blank(s)	Regional	0	None	None; diagnosed at autopsy	10	0	Blank(s)	Blank(s)	Blank(s)	Blank(s)	Blank(s)	Blank(s)	Blank(s)	Blank(s)	Blank(s)	Blank(s)	Blank(s)	Blank(s)	Blank(s)	988	0	98	Blank(s)	Miscellaneous Malignant Cancer	N/A not first tumor	N/A not first tumor	11
Insured	Married (including common law)	62	1946	2009	April	Male	White	C22.0-Liver	8170/3: Hepatocellular carcinoma, NOS	Unknown	8.6.3 Carcinoma of liver and intrahepatic bile ducts	VII(b) Hepatic carcinomas	Radiography without microscopic confirm	II	T2	N0	M0	Blank(s)	Blank(s)	Blank(s)	Blank(s)	Blank(s)	Localized	0	None	None; diagnosed at autopsy	999	999	Blank(s)	Blank(s)	Blank(s)	Blank(s)	Blank(s)	Blank(s)	Blank(s)	Blank(s)	Blank(s)	Blank(s)	Blank(s)	Blank(s)	Blank(s)	988	0	98	Blank(s)	Tongue	N/A not first tumor	N/A not first tumor	2
Any Medicaid	Married (including common law)	91	1920	2011	November	Male	Other (American Indian/AK Native, Asian/Pacific Islander)	C22.0-Liver	8170/3: Hepatocellular carcinoma, NOS	Unknown	8.6.3 Carcinoma of liver and intrahepatic bile ducts	VII(b) Hepatic carcinomas	Radiography without microscopic confirm	I	T1	N0	M0	Blank(s)	Blank(s)	Blank(s)	Blank(s)	Blank(s)	Localized	0	None	None; diagnosed at autopsy	998	999	Blank(s)	Blank(s)	Blank(s)	Blank(s)	Blank(s)	Blank(s)	Blank(s)	Blank(s)	Blank(s)	Blank(s)	Blank(s)	Blank(s)	Blank(s)	988	0	98	Blank(s)	Liver	N/A not first tumor	N/A not first tumor	2
Any Medicaid	Widowed	69	1942	2012	December	Female	Other (American Indian/AK Native, Asian/Pacific Islander)	C22.0-Liver	8170/3: Hepatocellular carcinoma, NOS	Well differentiated; Grade I	8.6.3 Carcinoma of liver and intrahepatic bile ducts	VII(b) Hepatic carcinomas	Positive histology	I	T1	N0	M0	Blank(s)	Blank(s)	Blank(s)	Blank(s)	Blank(s)	Localized	0	None	None; diagnosed at autopsy	10	1	Blank(s)	Blank(s)	Blank(s)	Blank(s)	Blank(s)	Blank(s)	Blank(s)	Blank(s)	Blank(s)	Blank(s)	Blank(s)	Blank(s)	Blank(s)	988	0	98	Blank(s)	Alive	N/A not first tumor	N/A not first tumor	48
Insured	Widowed	83	1926	2009	June	Female	Other (American Indian/AK Native, Asian/Pacific Islander)	C22.0-Liver	8170/3: Hepatocellular carcinoma, NOS	Unknown	8.6.3 Carcinoma of liver and intrahepatic bile ducts	VII(b) Hepatic carcinomas	Radiography without microscopic confirm	UNK Stage	TX	NX	MX	Blank(s)	Blank(s)	Blank(s)	Blank(s)	Blank(s)	Unknown/unstaged	0	None	None; diagnosed at autopsy	10	999	Blank(s)	Blank(s)	Blank(s)	Blank(s)	Blank(s)	Blank(s)	Blank(s)	Blank(s)	Blank(s)	Blank(s)	Blank(s)	Blank(s)	Blank(s)	988	0	98	Blank(s)	Liver	N/A not first tumor	N/A not first tumor	0
Blank(s)	Single (never married)	74	1931	2006	March	Male	White	C22.0-Liver	8170/3: Hepatocellular carcinoma, NOS	Unknown	8.6.3 Carcinoma of liver and intrahepatic bile ducts	VII(b) Hepatic carcinomas	Radiography without microscopic confirm	II	T2	N0	M0	Blank(s)	Blank(s)	Blank(s)	Blank(s)	Blank(s)	Regional	0	None	None; diagnosed at autopsy	20	999	Blank(s)	Blank(s)	Blank(s)	Blank(s)	Blank(s)	Blank(s)	Blank(s)	Blank(s)	Blank(s)	Blank(s)	Blank(s)	Blank(s)	Blank(s)	988	0	98	Blank(s)	Liver	N/A not first tumor	N/A not first tumor	37
Blank(s)	Married (including common law)	84	1921	2006	February	Male	Other (American Indian/AK Native, Asian/Pacific Islander)	C22.0-Liver	8170/3: Hepatocellular carcinoma, NOS	Unknown	8.6.3 Carcinoma of liver and intrahepatic bile ducts	VII(b) Hepatic carcinomas	Positive histology	IIIA	T3	N0	M0	Blank(s)	Blank(s)	Blank(s)	Blank(s)	Blank(s)	Regional	37	None	None; diagnosed at autopsy	10	999	Blank(s)	Blank(s)	Blank(s)	Blank(s)	Blank(s)	Blank(s)	Blank(s)	Blank(s)	Blank(s)	Blank(s)	Blank(s)	Blank(s)	Blank(s)	988	0	98	Blank(s)	Liver	N/A not first tumor	N/A not first tumor	15
Insured	Divorced	66	1944	2010	April	Male	White	C22.0-Liver	8170/3: Hepatocellular carcinoma, NOS	Unknown	8.6.3 Carcinoma of liver and intrahepatic bile ducts	VII(b) Hepatic carcinomas	Positive histology	I	T1	N0	M0	Blank(s)	Blank(s)	Blank(s)	Blank(s)	Blank(s)	Regional	0	None	None; diagnosed at autopsy	10	999	Blank(s)	Blank(s)	Blank(s)	Blank(s)	Blank(s)	Blank(s)	Blank(s)	Blank(s)	Blank(s)	Blank(s)	Blank(s)	Blank(s)	Blank(s)	988	0	98	Blank(s)	Liver	N/A not first tumor	N/A not first tumor	0
Insured	Married (including common law)	59	1949	2008	June	Male	Black	C22.0-Liver	8170/3: Hepatocellular carcinoma, NOS	Well differentiated; Grade I	8.6.3 Carcinoma of liver and intrahepatic bile ducts	VII(b) Hepatic carcinomas	Positive histology	I	T1	N0	M0	Blank(s)	Blank(s)	Blank(s)	Blank(s)	Blank(s)	Localized	16	Unknown or not applicable	None; diagnosed at autopsy	10	999	Blank(s)	Blank(s)	Blank(s)	Blank(s)	Blank(s)	Blank(s)	Blank(s)	Blank(s)	Blank(s)	Blank(s)	Blank(s)	Blank(s)	Blank(s)	988	0	98	Blank(s)	Liver	N/A not first tumor	N/A not first tumor	58
Insured	Widowed	92	1918	2011	July	Female	Other (American Indian/AK Native, Asian/Pacific Islander)	C22.0-Liver	8170/3: Hepatocellular carcinoma, NOS	Poorly differentiated; Grade III	8.6.3 Carcinoma of liver and intrahepatic bile ducts	VII(b) Hepatic carcinomas	Positive histology	IIINOS	T3	NX	M0	Blank(s)	Blank(s)	Blank(s)	Blank(s)	Blank(s)	Localized	0	None	None; diagnosed at autopsy	10	999	Blank(s)	Blank(s)	Blank(s)	Blank(s)	Blank(s)	Blank(s)	Blank(s)	Blank(s)	Blank(s)	Blank(s)	Blank(s)	Blank(s)	Blank(s)	988	0	98	Blank(s)	Liver	N/A not first tumor	N/A not first tumor	6
Blank(s)	Married (including common law)	71	1934	2005	July	Male	White	C22.0-Liver	8170/3: Hepatocellular carcinoma, NOS	Unknown	8.6.3 Carcinoma of liver and intrahepatic bile ducts	VII(b) Hepatic carcinomas	Positive histology	II	T2	N0	M0	Blank(s)	Blank(s)	Blank(s)	Blank(s)	Blank(s)	Localized	20	None	None; diagnosed at autopsy	20	999	Blank(s)	Blank(s)	Blank(s)	Blank(s)	Blank(s)	Blank(s)	Blank(s)	Blank(s)	Blank(s)	Blank(s)	Blank(s)	Blank(s)	Blank(s)	988	0	98	Blank(s)	Liver	N/A not first tumor	N/A not first tumor	33
Blank(s)	Divorced	53	1950	2004	August	Male	White	C22.0-Liver	8170/3: Hepatocellular carcinoma, NOS	Unknown	8.6.3 Carcinoma of liver and intrahepatic bile ducts	VII(b) Hepatic carcinomas	Positive histology	II	T2	N0	M0	Blank(s)	Blank(s)	Blank(s)	Blank(s)	Blank(s)	Localized	0	None	None; diagnosed at autopsy	10	1	Blank(s)	Blank(s)	Blank(s)	Blank(s)	Blank(s)	Blank(s)	Blank(s)	Blank(s)	Blank(s)	Blank(s)	Blank(s)	Blank(s)	Blank(s)	988	0	98	Blank(s)	Liver	N/A not first tumor	N/A not first tumor	7
Blank(s)	Married (including common law)	77	1928	2005	December	Male	White	C22.0-Liver	8170/3: Hepatocellular carcinoma, NOS	Unknown	8.6.3 Carcinoma of liver and intrahepatic bile ducts	VII(b) Hepatic carcinomas	Radiography without microscopic confirm	IIIC	T1	N1	M0	Blank(s)	Blank(s)	Blank(s)	Blank(s)	Blank(s)	Regional	0	None	None; diagnosed at autopsy	10	999	Blank(s)	Blank(s)	Blank(s)	Blank(s)	Blank(s)	Blank(s)	Blank(s)	Blank(s)	Blank(s)	Blank(s)	Blank(s)	Blank(s)	Blank(s)	988	0	98	Blank(s)	Liver	N/A not first tumor	N/A not first tumor	9
Blank(s)	Married (including common law)	72	1931	2004	February	Female	White	C22.0-Liver	8170/3: Hepatocellular carcinoma, NOS	Unknown	8.6.3 Carcinoma of liver and intrahepatic bile ducts	VII(b) Hepatic carcinomas	Clinical diagnosis only	UNK Stage	TX	NX	MX	Blank(s)	Blank(s)	Blank(s)	Blank(s)	Blank(s)	Unknown/unstaged	0	None	None; diagnosed at autopsy	10	999	Blank(s)	Blank(s)	Blank(s)	Blank(s)	Blank(s)	Blank(s)	Blank(s)	Blank(s)	Blank(s)	Blank(s)	Blank(s)	Blank(s)	Blank(s)	988	0	98	Blank(s)	Liver	N/A not first tumor	N/A not first tumor	0
Insured	Unknown	71	1938	2010	December	Male	White	C22.0-Liver	8170/3: Hepatocellular carcinoma, NOS	Well differentiated; Grade I	8.6.3 Carcinoma of liver and intrahepatic bile ducts	VII(b) Hepatic carcinomas	Positive histology	I	T1	N0	M0	Blank(s)	Blank(s)	Blank(s)	Blank(s)	Blank(s)	Localized	0	None	None; diagnosed at autopsy	998	999	Blank(s)	Blank(s)	Blank(s)	Blank(s)	Blank(s)	Blank(s)	Blank(s)	Blank(s)	Blank(s)	Blank(s)	Blank(s)	Blank(s)	Blank(s)	988	0	98	Blank(s)	Liver	N/A not first tumor	N/A not first tumor	4
Insured	Married (including common law)	94	1918	2012	October	Male	White	C22.0-Liver	8170/3: Hepatocellular carcinoma, NOS	Unknown	8.6.3 Carcinoma of liver and intrahepatic bile ducts	VII(b) Hepatic carcinomas	Positive histology	I	T1	N0	M0	Blank(s)	Blank(s)	Blank(s)	Blank(s)	Blank(s)	Localized	0	None	None; diagnosed at autopsy	10	1	Blank(s)	Blank(s)	Blank(s)	Blank(s)	Blank(s)	Blank(s)	Blank(s)	Blank(s)	Blank(s)	Blank(s)	Blank(s)	Blank(s)	Blank(s)	988	0	98	Blank(s)	Liver	N/A not first tumor	N/A not first tumor	9
Insured	Married (including common law)	79	1931	2010	September	Male	White	C22.0-Liver	8170/3: Hepatocellular carcinoma, NOS	Unknown	8.6.3 Carcinoma of liver and intrahepatic bile ducts	VII(b) Hepatic carcinomas	Positive laboratory test/marker study	IIIA	T3	N0	M0	Blank(s)	Blank(s)	Blank(s)	Blank(s)	Blank(s)	Regional	0	None	None; diagnosed at autopsy	10	1	Blank(s)	Blank(s)	Blank(s)	Blank(s)	Blank(s)	Blank(s)	Blank(s)	Blank(s)	Blank(s)	Blank(s)	Blank(s)	Blank(s)	Blank(s)	988	0	98	Blank(s)	Liver	N/A not first tumor	N/A not first tumor	7
Insured	Widowed	80	1929	2010	February	Female	Other (American Indian/AK Native, Asian/Pacific Islander)	C22.0-Liver	8170/3: Hepatocellular carcinoma, NOS	Well differentiated; Grade I	8.6.3 Carcinoma of liver and intrahepatic bile ducts	VII(b) Hepatic carcinomas	Positive histology	UNK Stage	TX	N0	MX	Blank(s)	Blank(s)	Blank(s)	Blank(s)	Blank(s)	Unknown/unstaged	0	None	None; diagnosed at autopsy	10	999	Blank(s)	Blank(s)	Blank(s)	Blank(s)	Blank(s)	Blank(s)	Blank(s)	Blank(s)	Blank(s)	Blank(s)	Blank(s)	Blank(s)	Blank(s)	988	0	98	Blank(s)	Liver	N/A not first tumor	N/A not first tumor	29
Insured	Single (never married)	70	1942	2013	January	Female	White	C22.0-Liver	8170/3: Hepatocellular carcinoma, NOS	Unknown	8.6.3 Carcinoma of liver and intrahepatic bile ducts	VII(b) Hepatic carcinomas	Radiography without microscopic confirm	II	T2	N0	M0	Blank(s)	Blank(s)	Blank(s)	Blank(s)	Blank(s)	Localized	0	None	None; diagnosed at autopsy	10	999	Blank(s)	Blank(s)	Blank(s)	Blank(s)	Blank(s)	Blank(s)	Blank(s)	Blank(s)	Blank(s)	Blank(s)	Blank(s)	Blank(s)	Blank(s)	988	0	98	Blank(s)	Liver	N/A not first tumor	N/A not first tumor	1
Insured	Married (including common law)	64	1942	2007	May	Male	White	C22.0-Liver	8170/3: Hepatocellular carcinoma, NOS	Unknown	8.6.3 Carcinoma of liver and intrahepatic bile ducts	VII(b) Hepatic carcinomas	Positive histology	IV	T3	NX	M1	Blank(s)	Blank(s)	Blank(s)	Blank(s)	Blank(s)	Distant	0	None	None; diagnosed at autopsy	20	999	Blank(s)	Blank(s)	Blank(s)	Blank(s)	Blank(s)	Blank(s)	Blank(s)	Blank(s)	Blank(s)	Blank(s)	Blank(s)	Blank(s)	Blank(s)	988	0	98	Blank(s)	Liver	N/A not first tumor	N/A not first tumor	2
Insured	Widowed	75	1935	2011	March	Female	Black	C22.0-Liver	8170/3: Hepatocellular carcinoma, NOS	Moderately differentiated; Grade II	8.6.3 Carcinoma of liver and intrahepatic bile ducts	VII(b) Hepatic carcinomas	Positive histology	IIIA	T3	N0	M0	Blank(s)	Blank(s)	Blank(s)	Blank(s)	Blank(s)	Regional	0	None	None; diagnosed at autopsy	10	999	Blank(s)	Blank(s)	Blank(s)	Blank(s)	Blank(s)	Blank(s)	Blank(s)	Blank(s)	Blank(s)	Blank(s)	Blank(s)	Blank(s)	Blank(s)	988	0	98	Blank(s)	Liver	N/A not first tumor	N/A not first tumor	2
Insured	Married (including common law)	74	1935	2009	April	Male	White	C22.0-Liver	8170/3: Hepatocellular carcinoma, NOS	Unknown	8.6.3 Carcinoma of liver and intrahepatic bile ducts	VII(b) Hepatic carcinomas	Positive histology	IIIA	T3	N0	M0	Blank(s)	Blank(s)	Blank(s)	Blank(s)	Blank(s)	Localized	0	None	None; diagnosed at autopsy	20	999	Blank(s)	Blank(s)	Blank(s)	Blank(s)	Blank(s)	Blank(s)	Blank(s)	Blank(s)	Blank(s)	Blank(s)	Blank(s)	Blank(s)	Blank(s)	988	98	0	Blank(s)	Liver	N/A not first tumor	N/A not first tumor	4
Insured	Divorced	83	1927	2010	June	Female	White	C22.1-Intrahepatic bile duct	8160/3: Cholangiocarcinoma	Unknown	8.6.3 Carcinoma of liver and intrahepatic bile ducts	VII(b) Hepatic carcinomas	Positive histology	IV	T3	N0	M1	Blank(s)	Blank(s)	Blank(s)	Blank(s)	Blank(s)	Distant	0	None	None; diagnosed at autopsy	20	999	Blank(s)	Blank(s)	Blank(s)	Blank(s)	Blank(s)	Blank(s)	Blank(s)	Blank(s)	Blank(s)	Blank(s)	Blank(s)	Blank(s)	Blank(s)	988	0	98	Blank(s)	Miscellaneous Malignant Cancer	N/A not first tumor	N/A not first tumor	0
Insured	Separated	58	1951	2010	May	Male	White	C22.0-Liver	8170/3: Hepatocellular carcinoma, NOS	Well differentiated; Grade I	8.6.3 Carcinoma of liver and intrahepatic bile ducts	VII(b) Hepatic carcinomas	Positive exfoliative cytology, no positive histology	II	T2	N0	M0	Blank(s)	Blank(s)	Blank(s)	Blank(s)	Blank(s)	Regional	16	None	None; diagnosed at autopsy	10	1	Blank(s)	Blank(s)	Blank(s)	Blank(s)	Blank(s)	Blank(s)	Blank(s)	Blank(s)	Blank(s)	Blank(s)	Blank(s)	Blank(s)	Blank(s)	988	0	98	Blank(s)	Miscellaneous Malignant Cancer	N/A not first tumor	N/A not first tumor	28
Blank(s)	Single (never married)	57	1946	2004	May	Female	Black	C22.0-Liver	8170/3: Hepatocellular carcinoma, NOS	Unknown	8.6.3 Carcinoma of liver and intrahepatic bile ducts	VII(b) Hepatic carcinomas	Radiography without microscopic confirm	I	T1	N0	M0	Blank(s)	Blank(s)	Blank(s)	Blank(s)	Blank(s)	Localized	0	None	None; diagnosed at autopsy	10	999	Blank(s)	Blank(s)	Blank(s)	Blank(s)	Blank(s)	Blank(s)	Blank(s)	Blank(s)	Blank(s)	Blank(s)	Blank(s)	Blank(s)	Blank(s)	988	0	98	Blank(s)	Alive	N/A not first tumor	N/A not first tumor	151
Blank(s)	Married (including common law)	85	1918	2004	July	Male	White	C22.0-Liver	8170/3: Hepatocellular carcinoma, NOS	Well differentiated; Grade I	8.6.3 Carcinoma of liver and intrahepatic bile ducts	VII(b) Hepatic carcinomas	Positive histology	UNK Stage	TX	N0	M0	Blank(s)	Blank(s)	Blank(s)	Blank(s)	Blank(s)	Localized	0	None	None; diagnosed at autopsy	20	999	Blank(s)	Blank(s)	Blank(s)	Blank(s)	Blank(s)	Blank(s)	Blank(s)	Blank(s)	Blank(s)	Blank(s)	Blank(s)	Blank(s)	Blank(s)	988	0	98	Blank(s)	Chronic Liver Disease and Cirrhosis	N/A not first tumor	N/A not first tumor	Unknown
Insured	Divorced	59	1953	2012	November	Female	Other (American Indian/AK Native, Asian/Pacific Islander)	C22.1-Intrahepatic bile duct	8160/3: Cholangiocarcinoma	Unknown	8.6.3 Carcinoma of liver and intrahepatic bile ducts	VII(b) Hepatic carcinomas	Positive histology	IV	T4	N1	M1	Blank(s)	Blank(s)	Blank(s)	Blank(s)	Blank(s)	Distant	0	None	None; diagnosed at autopsy	998	999	Blank(s)	Blank(s)	Blank(s)	Blank(s)	Blank(s)	Blank(s)	Blank(s)	Blank(s)	Blank(s)	Blank(s)	Blank(s)	Blank(s)	Blank(s)	988	0	98	Blank(s)	Intrahepatic Bile Duct	N/A not first tumor	N/A not first tumor	5
Insured	Single (never married)	85	1928	2013	March	Male	White	C22.0-Liver	8170/3: Hepatocellular carcinoma, NOS	Unknown	8.6.3 Carcinoma of liver and intrahepatic bile ducts	VII(b) Hepatic carcinomas	Positive histology	IIIC	T3	N1	M0	Blank(s)	Blank(s)	Blank(s)	Blank(s)	Blank(s)	Regional	0	None	None; diagnosed at autopsy	10	999	Blank(s)	Blank(s)	Blank(s)	Blank(s)	Blank(s)	Blank(s)	Blank(s)	Blank(s)	Blank(s)	Blank(s)	Blank(s)	Blank(s)	Blank(s)	988	0	98	Blank(s)	Liver	N/A not first tumor	N/A not first tumor	8
Blank(s)	Single (never married)	43	1962	2006	September	Male	White	C22.0-Liver	8170/3: Hepatocellular carcinoma, NOS	Unknown	8.6.3 Carcinoma of liver and intrahepatic bile ducts	VII(b) Hepatic carcinomas	Radiography without microscopic confirm	II	T2	N0	M0	Blank(s)	Blank(s)	Blank(s)	Blank(s)	Blank(s)	Localized	16	None	None; diagnosed at autopsy	10	1	Blank(s)	Blank(s)	Blank(s)	Blank(s)	Blank(s)	Blank(s)	Blank(s)	Blank(s)	Blank(s)	Blank(s)	Blank(s)	Blank(s)	Blank(s)	988	0	98	Blank(s)	Liver	N/A not first tumor	N/A not first tumor	57
Blank(s)	Married (including common law)	67	1937	2004	June	Male	White	C22.1-Intrahepatic bile duct	8160/3: Cholangiocarcinoma	Unknown	8.6.3 Carcinoma of liver and intrahepatic bile ducts	VII(b) Hepatic carcinomas	Positive exfoliative cytology, no positive histology	IV	T3	N1	M1	Blank(s)	Blank(s)	Blank(s)	Blank(s)	Blank(s)	Distant	0	None	None; diagnosed at autopsy	999	999	Blank(s)	Blank(s)	Blank(s)	Blank(s)	Blank(s)	Blank(s)	Blank(s)	Blank(s)	Blank(s)	Blank(s)	Blank(s)	Blank(s)	Blank(s)	988	0	98	Blank(s)	Intrahepatic Bile Duct	N/A not first tumor	N/A not first tumor	8
Blank(s)	Widowed	82	1921	2004	January	Female	White	C22.1-Intrahepatic bile duct	8160/3: Cholangiocarcinoma	Unknown	8.6.3 Carcinoma of liver and intrahepatic bile ducts	VII(b) Hepatic carcinomas	Positive exfoliative cytology, no positive histology	IIIA	T3	N0	M0	Blank(s)	Blank(s)	Blank(s)	Blank(s)	Blank(s)	Localized	0	None	None; diagnosed at autopsy	998	999	Blank(s)	Blank(s)	Blank(s)	Blank(s)	Blank(s)	Blank(s)	Blank(s)	Blank(s)	Blank(s)	Blank(s)	Blank(s)	Blank(s)	Blank(s)	988	0	98	Blank(s)	Intrahepatic Bile Duct	N/A not first tumor	N/A not first tumor	6
Blank(s)	Married (including common law)	54	1949	2004	July	Male	Other (American Indian/AK Native, Asian/Pacific Islander)	C22.0-Liver	8170/3: Hepatocellular carcinoma, NOS	Unknown	8.6.3 Carcinoma of liver and intrahepatic bile ducts	VII(b) Hepatic carcinomas	Positive exfoliative cytology, no positive histology	IIIA	T3	N0	M0	Blank(s)	Blank(s)	Blank(s)	Blank(s)	Blank(s)	Regional	0	None	None; diagnosed at autopsy	10	1	Blank(s)	Blank(s)	Blank(s)	Blank(s)	Blank(s)	Blank(s)	Blank(s)	Blank(s)	Blank(s)	Blank(s)	Blank(s)	Blank(s)	Blank(s)	988	0	98	Blank(s)	Miscellaneous Malignant Cancer	Dead (attributable to this cancer dx)	Alive or dead due to cancer	7
Blank(s)	Single (never married)	70	1934	2004	March	Female	Black	C22.0-Liver	8170/3: Hepatocellular carcinoma, NOS	Well differentiated; Grade I	8.6.3 Carcinoma of liver and intrahepatic bile ducts	VII(b) Hepatic carcinomas	Positive histology	IIIC	T3	N1	M0	Blank(s)	Blank(s)	Blank(s)	Blank(s)	Blank(s)	Regional	0	None	None; diagnosed at autopsy	998	999	Blank(s)	Blank(s)	Blank(s)	Blank(s)	Blank(s)	Blank(s)	Blank(s)	Blank(s)	Blank(s)	Blank(s)	Blank(s)	Blank(s)	Blank(s)	988	0	98	Blank(s)	Liver	Dead (attributable to this cancer dx)	Alive or dead due to cancer	1
Blank(s)	Single (never married)	38	1965	2004	February	Male	Other (American Indian/AK Native, Asian/Pacific Islander)	C22.0-Liver	8170/3: Hepatocellular carcinoma, NOS	Unknown	8.6.3 Carcinoma of liver and intrahepatic bile ducts	VII(b) Hepatic carcinomas	Positive histology	IIIA	T3	N0	M0	Blank(s)	Blank(s)	Blank(s)	Blank(s)	Blank(s)	Regional	0	None	None; diagnosed at autopsy	998	999	Blank(s)	Blank(s)	Blank(s)	Blank(s)	Blank(s)	Blank(s)	Blank(s)	Blank(s)	Blank(s)	Blank(s)	Blank(s)	Blank(s)	Blank(s)	988	0	98	Blank(s)	Liver	Dead (attributable to this cancer dx)	Alive or dead due to cancer	3
Blank(s)	Divorced	77	1926	2004	January	Male	White	C22.0-Liver	8170/3: Hepatocellular carcinoma, NOS	Moderately differentiated; Grade II	8.6.3 Carcinoma of liver and intrahepatic bile ducts	VII(b) Hepatic carcinomas	Positive histology	I	T1	N0	M0	Blank(s)	Blank(s)	Blank(s)	Blank(s)	Blank(s)	Localized	0	None	None; diagnosed at autopsy	999	999	Blank(s)	Blank(s)	Blank(s)	Blank(s)	Blank(s)	Blank(s)	Blank(s)	Blank(s)	Blank(s)	Blank(s)	Blank(s)	Blank(s)	Blank(s)	988	0	98	Blank(s)	Liver	Dead (attributable to this cancer dx)	Alive or dead due to cancer	0
Blank(s)	Married (including common law)	75	1928	2004	May	Male	White	C22.0-Liver	8170/3: Hepatocellular carcinoma, NOS	Well differentiated; Grade I	8.6.3 Carcinoma of liver and intrahepatic bile ducts	VII(b) Hepatic carcinomas	Positive histology	I	T1	N0	M0	Blank(s)	Blank(s)	Blank(s)	Blank(s)	Blank(s)	Localized	0	None	None; diagnosed at autopsy	20	999	Blank(s)	Blank(s)	Blank(s)	Blank(s)	Blank(s)	Blank(s)	Blank(s)	Blank(s)	Blank(s)	Blank(s)	Blank(s)	Blank(s)	Blank(s)	988	0	98	Blank(s)	Liver	Dead (attributable to this cancer dx)	Alive or dead due to cancer	4
Blank(s)	Unknown	68	1935	2004	January	Female	White	C22.0-Liver	8170/3: Hepatocellular carcinoma, NOS	Well differentiated; Grade I	8.6.3 Carcinoma of liver and intrahepatic bile ducts	VII(b) Hepatic carcinomas	Positive histology	UNK Stage	T2	NX	M0	Blank(s)	Blank(s)	Blank(s)	Blank(s)	Blank(s)	Regional	16	None	None; diagnosed at autopsy	10	999	Blank(s)	Blank(s)	Blank(s)	Blank(s)	Blank(s)	Blank(s)	Blank(s)	Blank(s)	Blank(s)	Blank(s)	Blank(s)	Blank(s)	Blank(s)	988	0	98	Blank(s)	Liver	Dead (attributable to this cancer dx)	Alive or dead due to cancer	78
Blank(s)	Single (never married)	83	1921	2004	January	Female	White	C22.0-Liver	8170/3: Hepatocellular carcinoma, NOS	Unknown	8.6.3 Carcinoma of liver and intrahepatic bile ducts	VII(b) Hepatic carcinomas	Radiography without microscopic confirm	UNK Stage	T1	NX	MX	Blank(s)	Blank(s)	Blank(s)	Blank(s)	Blank(s)	Localized	0	None	None; diagnosed at autopsy	10	999	Blank(s)	Blank(s)	Blank(s)	Blank(s)	Blank(s)	Blank(s)	Blank(s)	Blank(s)	Blank(s)	Blank(s)	Blank(s)	Blank(s)	Blank(s)	988	0	98	Blank(s)	Diseases of Heart	Alive or dead of other cause	Dead (attributable to causes other than this cancer dx)	5
Blank(s)	Widowed	54	1949	2004	January	Male	White	C22.0-Liver	8170/3: Hepatocellular carcinoma, NOS	Unknown	8.6.3 Carcinoma of liver and intrahepatic bile ducts	VII(b) Hepatic carcinomas	Radiography without microscopic confirm	UNK Stage	T2	N1	MX	Blank(s)	Blank(s)	Blank(s)	Blank(s)	Blank(s)	Regional	0	None	None; diagnosed at autopsy	998	999	Blank(s)	Blank(s)	Blank(s)	Blank(s)	Blank(s)	Blank(s)	Blank(s)	Blank(s)	Blank(s)	Blank(s)	Blank(s)	Blank(s)	Blank(s)	988	0	98	Blank(s)	Other Infectious and Parasitic Diseases including HIV	Alive or dead of other cause	Dead (attributable to causes other than this cancer dx)	0
Blank(s)	Single (never married)	53	1950	2004	March	Male	Other (American Indian/AK Native, Asian/Pacific Islander)	C22.0-Liver	8170/3: Hepatocellular carcinoma, NOS	Unknown	8.6.3 Carcinoma of liver and intrahepatic bile ducts	VII(b) Hepatic carcinomas	Positive histology	UNK Stage	T2	N0	MX	Blank(s)	Blank(s)	Blank(s)	Blank(s)	Blank(s)	Regional	0	None	None; diagnosed at autopsy	10	999	Blank(s)	Blank(s)	Blank(s)	Blank(s)	Blank(s)	Blank(s)	Blank(s)	Blank(s)	Blank(s)	Blank(s)	Blank(s)	Blank(s)	Blank(s)	988	0	98	Blank(s)	Intrahepatic Bile Duct	Dead (attributable to this cancer dx)	Alive or dead due to cancer	1
Insured	Married (including common law)	83	1926	2009	December	Male	White	C22.0-Liver	8170/3: Hepatocellular carcinoma, NOS	Moderately differentiated; Grade II	8.6.3 Carcinoma of liver and intrahepatic bile ducts	VII(b) Hepatic carcinomas	Positive histology	IV	T1	N1	M1	Blank(s)	Blank(s)	Blank(s)	Blank(s)	Blank(s)	Distant	0	None	None; diagnosed at autopsy	10	999	Blank(s)	Blank(s)	Blank(s)	Blank(s)	Blank(s)	Blank(s)	Blank(s)	Blank(s)	Blank(s)	Blank(s)	Blank(s)	Blank(s)	Blank(s)	988	0	98	Blank(s)	Liver	N/A not first tumor	N/A not first tumor	3
Insured	Married (including common law)	69	1943	2013	January	Male	White	C22.0-Liver	8170/3: Hepatocellular carcinoma, NOS	Moderately differentiated; Grade II	8.6.3 Carcinoma of liver and intrahepatic bile ducts	VII(b) Hepatic carcinomas	Positive histology	II	T2	N0	M0	Blank(s)	Blank(s)	Blank(s)	Blank(s)	Blank(s)	Regional	0	None	None; diagnosed at autopsy	20	0	Blank(s)	Blank(s)	Blank(s)	Blank(s)	Blank(s)	Blank(s)	Blank(s)	Blank(s)	Blank(s)	Blank(s)	Blank(s)	Blank(s)	Blank(s)	988	0	98	Blank(s)	Liver	N/A not first tumor	N/A not first tumor	24
Insured	Married (including common law)	73	1937	2011	October	Male	Other (American Indian/AK Native, Asian/Pacific Islander)	C22.0-Liver	8170/3: Hepatocellular carcinoma, NOS	Unknown	8.6.3 Carcinoma of liver and intrahepatic bile ducts	VII(b) Hepatic carcinomas	Radiography without microscopic confirm	II	T2	N0	M0	Blank(s)	Blank(s)	Blank(s)	Blank(s)	Blank(s)	Localized	0	None	None; diagnosed at autopsy	10	1	Blank(s)	Blank(s)	Blank(s)	Blank(s)	Blank(s)	Blank(s)	Blank(s)	Blank(s)	Blank(s)	Blank(s)	Blank(s)	Blank(s)	Blank(s)	988	0	98	Blank(s)	Liver	N/A not first tumor	N/A not first tumor	34
Blank(s)	Widowed	74	1929	2004	January	Male	Other (American Indian/AK Native, Asian/Pacific Islander)	C22.0-Liver	8170/3: Hepatocellular carcinoma, NOS	Unknown	8.6.3 Carcinoma of liver and intrahepatic bile ducts	VII(b) Hepatic carcinomas	Positive histology	UNK Stage	T2	NX	MX	Blank(s)	Blank(s)	Blank(s)	Blank(s)	Blank(s)	Localized	0	None	None; diagnosed at autopsy	999	0	Blank(s)	Blank(s)	Blank(s)	Blank(s)	Blank(s)	Blank(s)	Blank(s)	Blank(s)	Blank(s)	Blank(s)	Blank(s)	Blank(s)	Blank(s)	988	0	98	Blank(s)	Liver	Dead (attributable to this cancer dx)	Alive or dead due to cancer	5
Blank(s)	Married (including common law)	53	1951	2004	February	Male	White	C22.0-Liver	8170/3: Hepatocellular carcinoma, NOS	Moderately differentiated; Grade II	8.6.3 Carcinoma of liver and intrahepatic bile ducts	VII(b) Hepatic carcinomas	Positive histology	I	T1	N0	M0	Blank(s)	Blank(s)	Blank(s)	Blank(s)	Blank(s)	Localized	61	Number of regional lymph nodes removed unknown	None; diagnosed at autopsy	10	0	Blank(s)	Blank(s)	Blank(s)	Blank(s)	Blank(s)	Blank(s)	Blank(s)	Blank(s)	Blank(s)	Blank(s)	Blank(s)	Blank(s)	Blank(s)	988	1	0	Blank(s)	Liver	Dead (attributable to this cancer dx)	Alive or dead due to cancer	17
Blank(s)	Married (including common law)	82	1921	2004	January	Female	White	C22.0-Liver	8170/3: Hepatocellular carcinoma, NOS	Moderately differentiated; Grade II	8.6.3 Carcinoma of liver and intrahepatic bile ducts	VII(b) Hepatic carcinomas	Positive histology	UNK Stage	T1	NX	M0	Blank(s)	Blank(s)	Blank(s)	Blank(s)	Blank(s)	Localized	60	None	None; diagnosed at autopsy	999	999	Blank(s)	Blank(s)	Blank(s)	Blank(s)	Blank(s)	Blank(s)	Blank(s)	Blank(s)	Blank(s)	Blank(s)	Blank(s)	Blank(s)	Blank(s)	988	0	98	Blank(s)	Miscellaneous Malignant Cancer	Dead (attributable to this cancer dx)	Alive or dead due to cancer	16
Blank(s)	Married (including common law)	69	1937	2006	October	Male	White	C22.0-Liver	8170/3: Hepatocellular carcinoma, NOS	Unknown	8.6.3 Carcinoma of liver and intrahepatic bile ducts	VII(b) Hepatic carcinomas	Positive exfoliative cytology, no positive histology	IIIC	T2	N1	M0	Blank(s)	Blank(s)	Blank(s)	Blank(s)	Blank(s)	Regional	0	None	None; diagnosed at autopsy	10	999	Blank(s)	Blank(s)	Blank(s)	Blank(s)	Blank(s)	Blank(s)	Blank(s)	Blank(s)	Blank(s)	Blank(s)	Blank(s)	Blank(s)	Blank(s)	988	0	98	Blank(s)	Liver	N/A not first tumor	N/A not first tumor	2
Insured	Married (including common law)	75	1935	2010	September	Male	White	C22.0-Liver	8170/3: Hepatocellular carcinoma, NOS	Well differentiated; Grade I	8.6.3 Carcinoma of liver and intrahepatic bile ducts	VII(b) Hepatic carcinomas	Positive histology	I	T1	N0	M0	Blank(s)	Blank(s)	Blank(s)	Blank(s)	Blank(s)	Localized	0	None	None; diagnosed at autopsy	10	1	Blank(s)	Blank(s)	Blank(s)	Blank(s)	Blank(s)	Blank(s)	Blank(s)	Blank(s)	Blank(s)	Blank(s)	Blank(s)	Blank(s)	Blank(s)	988	0	98	Blank(s)	Liver	N/A not first tumor	N/A not first tumor	59
Insured	Married (including common law)	70	1944	2014	December	Male	White	C22.0-Liver	8170/3: Hepatocellular carcinoma, NOS	Well differentiated; Grade I	8.6.3 Carcinoma of liver and intrahepatic bile ducts	VII(b) Hepatic carcinomas	Positive histology	IIIA	T3	N0	M0	Blank(s)	Blank(s)	Blank(s)	Blank(s)	Blank(s)	Localized	16	None	None; diagnosed at autopsy	20	1	Blank(s)	Blank(s)	Blank(s)	Blank(s)	Blank(s)	Blank(s)	Blank(s)	Blank(s)	Blank(s)	Blank(s)	Blank(s)	Blank(s)	Blank(s)	988	0	98	Blank(s)	Alive	N/A not first tumor	N/A not first tumor	24
Blank(s)	Divorced	61	1942	2004	March	Male	Other (American Indian/AK Native, Asian/Pacific Islander)	C22.0-Liver	8170/3: Hepatocellular carcinoma, NOS	Unknown	8.6.3 Carcinoma of liver and intrahepatic bile ducts	VII(b) Hepatic carcinomas	Positive histology	IIIA	T3	N0	M0	Blank(s)	Blank(s)	Blank(s)	Blank(s)	Blank(s)	Localized	61	None	None; diagnosed at autopsy	10	0	Blank(s)	Blank(s)	Blank(s)	Blank(s)	Blank(s)	Blank(s)	Blank(s)	Blank(s)	Blank(s)	Blank(s)	Blank(s)	Blank(s)	Blank(s)	988	0	98	Blank(s)	Liver	Dead (attributable to this cancer dx)	Alive or dead due to cancer	49
Insured	Unknown	87	1925	2013	July	Female	Other (American Indian/AK Native, Asian/Pacific Islander)	C22.0-Liver	8170/3: Hepatocellular carcinoma, NOS	Unknown	8.6.3 Carcinoma of liver and intrahepatic bile ducts	VII(b) Hepatic carcinomas	Radiography without microscopic confirm	I	T1	N0	M0	Blank(s)	Blank(s)	Blank(s)	Blank(s)	Blank(s)	Localized	0	None	None; diagnosed at autopsy	20	999	Blank(s)	Blank(s)	Blank(s)	Blank(s)	Blank(s)	Blank(s)	Blank(s)	Blank(s)	Blank(s)	Blank(s)	Blank(s)	Blank(s)	Blank(s)	988	0	98	Blank(s)	Liver	N/A not first tumor	N/A not first tumor	28
Blank(s)	Married (including common law)	52	1952	2004	February	Male	White	C22.0-Liver	8170/3: Hepatocellular carcinoma, NOS	Unknown	8.6.3 Carcinoma of liver and intrahepatic bile ducts	VII(b) Hepatic carcinomas	Positive laboratory test/marker study	IV	TX	N0	M1	Blank(s)	Blank(s)	Blank(s)	Blank(s)	Blank(s)	Distant	0	None	None; diagnosed at autopsy	10	999	Blank(s)	Blank(s)	Blank(s)	Blank(s)	Blank(s)	Blank(s)	Blank(s)	Blank(s)	Blank(s)	Blank(s)	Blank(s)	Blank(s)	Blank(s)	988	0	98	Blank(s)	Liver	Dead (attributable to this cancer dx)	Alive or dead due to cancer	0
Any Medicaid	Widowed	85	1927	2012	October	Male	Other (American Indian/AK Native, Asian/Pacific Islander)	C22.0-Liver	8170/3: Hepatocellular carcinoma, NOS	Unknown	8.6.3 Carcinoma of liver and intrahepatic bile ducts	VII(b) Hepatic carcinomas	Positive histology	I	T1	N0	M0	Blank(s)	Blank(s)	Blank(s)	Blank(s)	Blank(s)	Localized	0	None	None; diagnosed at autopsy	997	999	Blank(s)	Blank(s)	Blank(s)	Blank(s)	Blank(s)	Blank(s)	Blank(s)	Blank(s)	Blank(s)	Blank(s)	Blank(s)	Blank(s)	Blank(s)	988	0	98	Blank(s)	Liver	N/A not first tumor	N/A not first tumor	2
Blank(s)	Married (including common law)	68	1935	2004	January	Male	Black	C22.0-Liver	8170/3: Hepatocellular carcinoma, NOS	Unknown	8.6.3 Carcinoma of liver and intrahepatic bile ducts	VII(b) Hepatic carcinomas	Positive laboratory test/marker study	IIINOS	T4	NX	M0	Blank(s)	Blank(s)	Blank(s)	Blank(s)	Blank(s)	Regional	0	None	None; diagnosed at autopsy	10	999	Blank(s)	Blank(s)	Blank(s)	Blank(s)	Blank(s)	Blank(s)	Blank(s)	Blank(s)	Blank(s)	Blank(s)	Blank(s)	Blank(s)	Blank(s)	988	0	98	Blank(s)	Liver	N/A not first tumor	N/A not first tumor	5
Insured	Widowed	94	1913	2008	July	Female	White	C22.0-Liver	8140/3: Adenocarcinoma, NOS	Unknown	8.6.3 Carcinoma of liver and intrahepatic bile ducts	VII(b) Hepatic carcinomas	Positive histology	I	T1	N0	M0	Blank(s)	Blank(s)	Blank(s)	Blank(s)	Blank(s)	Localized	0	None	None; diagnosed at autopsy	20	999	Blank(s)	Blank(s)	Blank(s)	Blank(s)	Blank(s)	Blank(s)	Blank(s)	Blank(s)	Blank(s)	Blank(s)	Blank(s)	Blank(s)	Blank(s)	988	0	98	Blank(s)	Liver	N/A not first tumor	N/A not first tumor	11
Insured	Widowed	88	1922	2011	March	Female	White	C22.0-Liver	8170/3: Hepatocellular carcinoma, NOS	Moderately differentiated; Grade II	8.6.3 Carcinoma of liver and intrahepatic bile ducts	VII(b) Hepatic carcinomas	Positive histology	IV	T1	N0	M1	Blank(s)	Blank(s)	Blank(s)	Blank(s)	Blank(s)	Distant	0	None	None; diagnosed at autopsy	999	999	Blank(s)	Blank(s)	Blank(s)	Blank(s)	Blank(s)	Blank(s)	Blank(s)	Blank(s)	Blank(s)	Blank(s)	Blank(s)	Blank(s)	Blank(s)	988	0	98	Blank(s)	Liver	N/A not first tumor	N/A not first tumor	0
Insured	Single (never married)	69	1941	2010	April	Female	White	C22.1-Intrahepatic bile duct	8160/3: Cholangiocarcinoma	Unknown	8.6.3 Carcinoma of liver and intrahepatic bile ducts	VII(b) Hepatic carcinomas	Positive histology	I	T1	N0	M0	Blank(s)	Blank(s)	Blank(s)	Blank(s)	Blank(s)	Localized	0	None	None; diagnosed at autopsy	999	999	Blank(s)	Blank(s)	Blank(s)	Blank(s)	Blank(s)	Blank(s)	Blank(s)	Blank(s)	Blank(s)	Blank(s)	Blank(s)	Blank(s)	Blank(s)	988	98	0	Blank(s)	Intrahepatic Bile Duct	N/A not first tumor	N/A not first tumor	16
Insured	Married (including common law)	57	1951	2009	February	Male	Other (American Indian/AK Native, Asian/Pacific Islander)	C22.1-Intrahepatic bile duct	8160/3: Cholangiocarcinoma	Unknown	8.6.3 Carcinoma of liver and intrahepatic bile ducts	VII(b) Hepatic carcinomas	Positive histology	I	T1	N0	M0	Blank(s)	Blank(s)	Blank(s)	Blank(s)	Blank(s)	Localized	0	None	None; diagnosed at autopsy	999	999	Blank(s)	Blank(s)	Blank(s)	Blank(s)	Blank(s)	Blank(s)	Blank(s)	Blank(s)	Blank(s)	Blank(s)	Blank(s)	Blank(s)	Blank(s)	988	0	98	Blank(s)	Intrahepatic Bile Duct	N/A not first tumor	N/A not first tumor	91
Insured	Single (never married)	75	1938	2013	December	Female	Other (American Indian/AK Native, Asian/Pacific Islander)	C22.0-Liver	8170/3: Hepatocellular carcinoma, NOS	Unknown	8.6.3 Carcinoma of liver and intrahepatic bile ducts	VII(b) Hepatic carcinomas	Radiography without microscopic confirm	IIIA	T3	N0	M0	Blank(s)	Blank(s)	Blank(s)	Blank(s)	Blank(s)	Regional	0	None	None; diagnosed at autopsy	10	999	Blank(s)	Blank(s)	Blank(s)	Blank(s)	Blank(s)	Blank(s)	Blank(s)	Blank(s)	Blank(s)	Blank(s)	Blank(s)	Blank(s)	Blank(s)	988	0	98	Blank(s)	Liver	N/A not first tumor	N/A not first tumor	4
Any Medicaid	Single (never married)	11	2002	2013	October	Female	White	C22.0-Liver	8170/3: Hepatocellular carcinoma, NOS	Well differentiated; Grade I	8.6.3 Carcinoma of liver and intrahepatic bile ducts	VII(b) Hepatic carcinomas	Positive histology	IIIA	T3	N0	M0	Blank(s)	Blank(s)	Blank(s)	Blank(s)	Blank(s)	Regional	61	None	None; diagnosed at autopsy	20	0	Blank(s)	Blank(s)	Blank(s)	Blank(s)	Blank(s)	Blank(s)	Blank(s)	Blank(s)	Blank(s)	Blank(s)	Blank(s)	Blank(s)	Blank(s)	988	0	98	Blank(s)	Alive	N/A not first tumor	N/A not first tumor	38
Blank(s)	Married (including common law)	75	1928	2004	July	Male	White	C22.0-Liver	8170/3: Hepatocellular carcinoma, NOS	Unknown	8.6.3 Carcinoma of liver and intrahepatic bile ducts	VII(b) Hepatic carcinomas	Positive histology	I	T1	N0	M0	Blank(s)	Blank(s)	Blank(s)	Blank(s)	Blank(s)	Regional	0	None	None; diagnosed at autopsy	20	999	Blank(s)	Blank(s)	Blank(s)	Blank(s)	Blank(s)	Blank(s)	Blank(s)	Blank(s)	Blank(s)	Blank(s)	Blank(s)	Blank(s)	Blank(s)	988	0	98	Blank(s)	Liver	N/A not first tumor	N/A not first tumor	1
Blank(s)	Married (including common law)	58	1945	2004	January	Male	White	C22.0-Liver	8170/3: Hepatocellular carcinoma, NOS	Unknown	8.6.3 Carcinoma of liver and intrahepatic bile ducts	VII(b) Hepatic carcinomas	Positive histology	IV	TX	NX	M1	Blank(s)	Blank(s)	Blank(s)	Blank(s)	Blank(s)	Distant	0	None	None; diagnosed at autopsy	999	999	Blank(s)	Blank(s)	Blank(s)	Blank(s)	Blank(s)	Blank(s)	Blank(s)	Blank(s)	Blank(s)	Blank(s)	Blank(s)	Blank(s)	Blank(s)	988	0	98	Blank(s)	Miscellaneous Malignant Cancer	Dead (attributable to this cancer dx)	Alive or dead due to cancer	2
Blank(s)	Married (including common law)	63	1940	2004	March	Male	Other (American Indian/AK Native, Asian/Pacific Islander)	C22.0-Liver	8170/3: Hepatocellular carcinoma, NOS	Unknown	8.6.3 Carcinoma of liver and intrahepatic bile ducts	VII(b) Hepatic carcinomas	Positive histology	UNK Stage	TX	NX	MX	Blank(s)	Blank(s)	Blank(s)	Blank(s)	Blank(s)	Unknown/unstaged	0	None	None; diagnosed at autopsy	999	999	Blank(s)	Blank(s)	Blank(s)	Blank(s)	Blank(s)	Blank(s)	Blank(s)	Blank(s)	Blank(s)	Blank(s)	Blank(s)	Blank(s)	Blank(s)	988	0	98	Blank(s)	Liver	Dead (attributable to this cancer dx)	Alive or dead due to cancer	2
Insured	Married (including common law)	64	1949	2013	September	Female	White	C22.0-Liver	8160/3: Cholangiocarcinoma	Unknown	8.6.3 Carcinoma of liver and intrahepatic bile ducts	VII(b) Hepatic carcinomas	Positive histology	IIIA	T3	N0	M0	Blank(s)	Blank(s)	Blank(s)	Blank(s)	Blank(s)	Regional	0	None	None; diagnosed at autopsy	999	999	Blank(s)	Blank(s)	Blank(s)	Blank(s)	Blank(s)	Blank(s)	Blank(s)	Blank(s)	Blank(s)	Blank(s)	Blank(s)	Blank(s)	Blank(s)	988	0	98	Blank(s)	Intrahepatic Bile Duct	N/A not first tumor	N/A not first tumor	13
Blank(s)	Widowed	72	1931	2004	March	Female	White	C22.0-Liver	8170/3: Hepatocellular carcinoma, NOS	Moderately differentiated; Grade II	8.6.3 Carcinoma of liver and intrahepatic bile ducts	VII(b) Hepatic carcinomas	Positive histology	I	T1	N0	M0	Blank(s)	Blank(s)	Blank(s)	Blank(s)	Blank(s)	Localized	37	None	None; diagnosed at autopsy	10	999	Blank(s)	Blank(s)	Blank(s)	Blank(s)	Blank(s)	Blank(s)	Blank(s)	Blank(s)	Blank(s)	Blank(s)	Blank(s)	Blank(s)	Blank(s)	988	0	98	Blank(s)	Liver	Dead (attributable to this cancer dx)	Alive or dead due to cancer	3
Blank(s)	Married (including common law)	74	1929	2004	January	Male	White	C22.0-Liver	8170/3: Hepatocellular carcinoma, NOS	Well differentiated; Grade I	8.6.3 Carcinoma of liver and intrahepatic bile ducts	VII(b) Hepatic carcinomas	Positive histology	IIIA	T3	N0	M0	Blank(s)	Blank(s)	Blank(s)	Blank(s)	Blank(s)	Regional	21	None	None; diagnosed at autopsy	20	999	Blank(s)	Blank(s)	Blank(s)	Blank(s)	Blank(s)	Blank(s)	Blank(s)	Blank(s)	Blank(s)	Blank(s)	Blank(s)	Blank(s)	Blank(s)	988	0	98	Blank(s)	Liver	N/A not first tumor	N/A not first tumor	20
Blank(s)	Married (including common law)	69	1935	2004	May	Male	White	C22.0-Liver	8170/3: Hepatocellular carcinoma, NOS	Unknown	8.6.3 Carcinoma of liver and intrahepatic bile ducts	VII(b) Hepatic carcinomas	Positive histology	I	T1	N0	M0	Blank(s)	Blank(s)	Blank(s)	Blank(s)	Blank(s)	Localized	16	None	None; diagnosed at autopsy	999	999	Blank(s)	Blank(s)	Blank(s)	Blank(s)	Blank(s)	Blank(s)	Blank(s)	Blank(s)	Blank(s)	Blank(s)	Blank(s)	Blank(s)	Blank(s)	988	0	98	Blank(s)	Liver	Dead (attributable to this cancer dx)	Alive or dead due to cancer	48
Blank(s)	Widowed	74	1929	2004	February	Male	Other (American Indian/AK Native, Asian/Pacific Islander)	C22.0-Liver	8170/3: Hepatocellular carcinoma, NOS	Unknown	8.6.3 Carcinoma of liver and intrahepatic bile ducts	VII(b) Hepatic carcinomas	Radiography without microscopic confirm	II	T2	N0	M0	Blank(s)	Blank(s)	Blank(s)	Blank(s)	Blank(s)	Localized	0	None	None; diagnosed at autopsy	20	0	Blank(s)	Blank(s)	Blank(s)	Blank(s)	Blank(s)	Blank(s)	Blank(s)	Blank(s)	Blank(s)	Blank(s)	Blank(s)	Blank(s)	Blank(s)	988	0	98	Blank(s)	Alive	Alive or dead of other cause	Alive or dead due to cancer	154
Blank(s)	Married (including common law)	72	1931	2004	March	Female	Black	C22.1-Intrahepatic bile duct	8160/3: Cholangiocarcinoma	Unknown	8.6.3 Carcinoma of liver and intrahepatic bile ducts	VII(b) Hepatic carcinomas	Positive histology	IV	T3	N1	M1	Blank(s)	Blank(s)	Blank(s)	Blank(s)	Blank(s)	Distant	0	None	None; diagnosed at autopsy	999	999	Blank(s)	Blank(s)	Blank(s)	Blank(s)	Blank(s)	Blank(s)	Blank(s)	Blank(s)	Blank(s)	Blank(s)	Blank(s)	Blank(s)	Blank(s)	988	0	98	Blank(s)	Intrahepatic Bile Duct	Dead (attributable to this cancer dx)	Alive or dead due to cancer	2
Blank(s)	Single (never married)	51	1952	2004	April	Female	White	C22.0-Liver	8170/3: Hepatocellular carcinoma, NOS	Unknown	8.6.3 Carcinoma of liver and intrahepatic bile ducts	VII(b) Hepatic carcinomas	Positive exfoliative cytology, no positive histology	UNK Stage	TX	N0	M0	Blank(s)	Blank(s)	Blank(s)	Blank(s)	Blank(s)	Unknown/unstaged	0	None	None; diagnosed at autopsy	999	999	Blank(s)	Blank(s)	Blank(s)	Blank(s)	Blank(s)	Blank(s)	Blank(s)	Blank(s)	Blank(s)	Blank(s)	Blank(s)	Blank(s)	Blank(s)	988	0	98	Blank(s)	Liver	Dead (attributable to this cancer dx)	Alive or dead due to cancer	15
Blank(s)	Married (including common law)	55	1949	2004	June	Male	Other (American Indian/AK Native, Asian/Pacific Islander)	C22.0-Liver	8170/3: Hepatocellular carcinoma, NOS	Moderately differentiated; Grade II	8.6.3 Carcinoma of liver and intrahepatic bile ducts	VII(b) Hepatic carcinomas	Positive histology	IIIA	T3	N0	M0	Blank(s)	Blank(s)	Blank(s)	Blank(s)	Blank(s)	Localized	0	None	None; diagnosed at autopsy	10	999	Blank(s)	Blank(s)	Blank(s)	Blank(s)	Blank(s)	Blank(s)	Blank(s)	Blank(s)	Blank(s)	Blank(s)	Blank(s)	Blank(s)	Blank(s)	988	0	98	Blank(s)	Miscellaneous Malignant Cancer	Dead (attributable to this cancer dx)	Alive or dead due to cancer	19
Insured	Single (never married)	53	1956	2010	September	Male	Other (American Indian/AK Native, Asian/Pacific Islander)	C22.1-Intrahepatic bile duct	8160/3: Cholangiocarcinoma	Unknown	8.6.3 Carcinoma of liver and intrahepatic bile ducts	VII(b) Hepatic carcinomas	Radiography without microscopic confirm	IV	T4	NX	M1	Blank(s)	Blank(s)	Blank(s)	Blank(s)	Blank(s)	Distant	0	None	None; diagnosed at autopsy	998	999	Blank(s)	Blank(s)	Blank(s)	Blank(s)	Blank(s)	Blank(s)	Blank(s)	Blank(s)	Blank(s)	Blank(s)	Blank(s)	Blank(s)	Blank(s)	988	0	98	Blank(s)	Intrahepatic Bile Duct	N/A not first tumor	N/A not first tumor	0
Insured	Married (including common law)	79	1933	2012	October	Male	Other (American Indian/AK Native, Asian/Pacific Islander)	C22.0-Liver	8170/3: Hepatocellular carcinoma, NOS	Moderately differentiated; Grade II	8.6.3 Carcinoma of liver and intrahepatic bile ducts	VII(b) Hepatic carcinomas	Positive histology	I	T1	N0	M0	Blank(s)	Blank(s)	Blank(s)	Blank(s)	Blank(s)	Localized	0	None	None; diagnosed at autopsy	10	999	Blank(s)	Blank(s)	Blank(s)	Blank(s)	Blank(s)	Blank(s)	Blank(s)	Blank(s)	Blank(s)	Blank(s)	Blank(s)	Blank(s)	Blank(s)	988	0	98	Blank(s)	Liver	N/A not first tumor	N/A not first tumor	7
Blank(s)	Single (never married)	56	1948	2004	Blank(s)	Male	Black	C22.0-Liver	8000/3: Neoplasm, malignant	Unknown	10 Unspecified Malignant Neoplasms	VII(c) Unspecified malignant hepatic tumors	Radiography without microscopic confirm	UNK Stage	T3	NX	MX	Blank(s)	Blank(s)	Blank(s)	Blank(s)	Blank(s)	Regional	0	None	None; diagnosed at autopsy	10	999	Blank(s)	Blank(s)	Blank(s)	Blank(s)	Blank(s)	Blank(s)	Blank(s)	Blank(s)	Blank(s)	Blank(s)	Blank(s)	Blank(s)	Blank(s)	988	0	98	Blank(s)	Liver	Dead (attributable to this cancer dx)	Alive or dead due to cancer	4
Insured	Divorced	58	1951	2009	February	Male	Other (American Indian/AK Native, Asian/Pacific Islander)	C22.0-Liver	8170/3: Hepatocellular carcinoma, NOS	Well differentiated; Grade I	8.6.3 Carcinoma of liver and intrahepatic bile ducts	VII(b) Hepatic carcinomas	Positive histology	IV	T3	N1	M1	Blank(s)	Blank(s)	Blank(s)	Blank(s)	Blank(s)	Distant	0	None	None; diagnosed at autopsy	10	1	Blank(s)	Blank(s)	Blank(s)	Blank(s)	Blank(s)	Blank(s)	Blank(s)	Blank(s)	Blank(s)	Blank(s)	Blank(s)	Blank(s)	Blank(s)	988	0	98	Blank(s)	Miscellaneous Malignant Cancer	N/A not first tumor	N/A not first tumor	4
Any Medicaid	Married (including common law)	80	1929	2010	April	Male	Other (American Indian/AK Native, Asian/Pacific Islander)	C22.0-Liver	8170/3: Hepatocellular carcinoma, NOS	Unknown	8.6.3 Carcinoma of liver and intrahepatic bile ducts	VII(b) Hepatic carcinomas	Positive histology	I	T1	N0	M0	Blank(s)	Blank(s)	Blank(s)	Blank(s)	Blank(s)	Regional	0	None	None; diagnosed at autopsy	10	999	Blank(s)	Blank(s)	Blank(s)	Blank(s)	Blank(s)	Blank(s)	Blank(s)	Blank(s)	Blank(s)	Blank(s)	Blank(s)	Blank(s)	Blank(s)	988	0	98	Blank(s)	Alive	N/A not first tumor	N/A not first tumor	80
Blank(s)	Married (including common law)	67	1936	2004	February	Male	Black	C22.1-Intrahepatic bile duct	8160/3: Cholangiocarcinoma	Unknown	8.6.3 Carcinoma of liver and intrahepatic bile ducts	VII(b) Hepatic carcinomas	Positive histology	IV	TX	NX	M1	Blank(s)	Blank(s)	Blank(s)	Blank(s)	Blank(s)	Distant	0	None	None; diagnosed at autopsy	10	999	Blank(s)	Blank(s)	Blank(s)	Blank(s)	Blank(s)	Blank(s)	Blank(s)	Blank(s)	Blank(s)	Blank(s)	Blank(s)	Blank(s)	Blank(s)	988	0	98	Blank(s)	Liver	Dead (attributable to this cancer dx)	Alive or dead due to cancer	10
Blank(s)	Divorced	35	1968	2004	March	Male	Other (American Indian/AK Native, Asian/Pacific Islander)	C22.0-Liver	8170/3: Hepatocellular carcinoma, NOS	Poorly differentiated; Grade III	8.6.3 Carcinoma of liver and intrahepatic bile ducts	VII(b) Hepatic carcinomas	Positive histology	II	T2	N0	M0	Blank(s)	Blank(s)	Blank(s)	Blank(s)	Blank(s)	Localized	22	None	None; diagnosed at autopsy	10	999	Blank(s)	Blank(s)	Blank(s)	Blank(s)	Blank(s)	Blank(s)	Blank(s)	Blank(s)	Blank(s)	Blank(s)	Blank(s)	Blank(s)	Blank(s)	988	0	98	Blank(s)	Liver	Dead (attributable to this cancer dx)	Alive or dead due to cancer	59
Blank(s)	Single (never married)	57	1946	2004	June	Male	White	C22.0-Liver	8170/3: Hepatocellular carcinoma, NOS	Unknown	8.6.3 Carcinoma of liver and intrahepatic bile ducts	VII(b) Hepatic carcinomas	Positive histology	UNK Stage	TX	NX	M0	Blank(s)	Blank(s)	Blank(s)	Blank(s)	Blank(s)	Regional	0	None	None; diagnosed at autopsy	10	999	Blank(s)	Blank(s)	Blank(s)	Blank(s)	Blank(s)	Blank(s)	Blank(s)	Blank(s)	Blank(s)	Blank(s)	Blank(s)	Blank(s)	Blank(s)	988	0	98	Blank(s)	Other Cause of Death	Alive or dead of other cause	Dead (attributable to causes other than this cancer dx)	2
Blank(s)	Married (including common law)	64	1939	2004	March	Female	Black	C22.0-Liver	8170/3: Hepatocellular carcinoma, NOS	Unknown	8.6.3 Carcinoma of liver and intrahepatic bile ducts	VII(b) Hepatic carcinomas	Radiography without microscopic confirm	II	T2	N0	M0	Blank(s)	Blank(s)	Blank(s)	Blank(s)	Blank(s)	Regional	0	None	None; diagnosed at autopsy	10	999	Blank(s)	Blank(s)	Blank(s)	Blank(s)	Blank(s)	Blank(s)	Blank(s)	Blank(s)	Blank(s)	Blank(s)	Blank(s)	Blank(s)	Blank(s)	988	0	98	Blank(s)	Chronic Liver Disease and Cirrhosis	Dead (attributable to this cancer dx)	Alive or dead due to cancer	54
Blank(s)	Single (never married)	44	1960	2004	August	Male	White	C22.0-Liver	8170/3: Hepatocellular carcinoma, NOS	Unknown	8.6.3 Carcinoma of liver and intrahepatic bile ducts	VII(b) Hepatic carcinomas	Positive histology	UNK Stage	T4	NX	MX	Blank(s)	Blank(s)	Blank(s)	Blank(s)	Blank(s)	Regional	0	None	None; diagnosed at autopsy	10	999	Blank(s)	Blank(s)	Blank(s)	Blank(s)	Blank(s)	Blank(s)	Blank(s)	Blank(s)	Blank(s)	Blank(s)	Blank(s)	Blank(s)	Blank(s)	988	0	98	Blank(s)	Liver	Dead (attributable to this cancer dx)	Alive or dead due to cancer	1
Any Medicaid	Widowed	80	1930	2010	October	Male	Black	C22.0-Liver	8170/3: Hepatocellular carcinoma, NOS	Moderately differentiated; Grade II	8.6.3 Carcinoma of liver and intrahepatic bile ducts	VII(b) Hepatic carcinomas	Positive histology	IIIA	T3	N0	M0	Blank(s)	Blank(s)	Blank(s)	Blank(s)	Blank(s)	Localized	16	None	None; diagnosed at autopsy	999	1	Blank(s)	Blank(s)	Blank(s)	Blank(s)	Blank(s)	Blank(s)	Blank(s)	Blank(s)	Blank(s)	Blank(s)	Blank(s)	Blank(s)	Blank(s)	988	0	98	Blank(s)	Miscellaneous Malignant Cancer	N/A not first tumor	N/A not first tumor	10
Blank(s)	Single (never married)	64	1939	2004	March	Male	White	C22.0-Liver	8170/3: Hepatocellular carcinoma, NOS	Well differentiated; Grade I	8.6.3 Carcinoma of liver and intrahepatic bile ducts	VII(b) Hepatic carcinomas	Positive histology	I	T1	N0	M0	Blank(s)	Blank(s)	Blank(s)	Blank(s)	Blank(s)	Localized	61	None	None; diagnosed at autopsy	999	999	Blank(s)	Blank(s)	Blank(s)	Blank(s)	Blank(s)	Blank(s)	Blank(s)	Blank(s)	Blank(s)	Blank(s)	Blank(s)	Blank(s)	Blank(s)	988	0	98	Blank(s)	Alive	Alive or dead of other cause	Alive or dead due to cancer	153
Insured/No specifics	Widowed	82	1927	2010	October	Male	White	C22.0-Liver	8170/3: Hepatocellular carcinoma, NOS	Unknown	8.6.3 Carcinoma of liver and intrahepatic bile ducts	VII(b) Hepatic carcinomas	Positive histology	IIIA	T3	N0	M0	Blank(s)	Blank(s)	Blank(s)	Blank(s)	Blank(s)	Localized	0	None	None; diagnosed at autopsy	10	1	Blank(s)	Blank(s)	Blank(s)	Blank(s)	Blank(s)	Blank(s)	Blank(s)	Blank(s)	Blank(s)	Blank(s)	Blank(s)	Blank(s)	Blank(s)	988	0	98	Blank(s)	Liver	N/A not first tumor	N/A not first tumor	63
Blank(s)	Single (never married)	89	1916	2005	April	Female	White	C22.0-Liver	8170/3: Hepatocellular carcinoma, NOS	Unknown	8.6.3 Carcinoma of liver and intrahepatic bile ducts	VII(b) Hepatic carcinomas	Positive histology	II	T2	N0	M0	Blank(s)	Blank(s)	Blank(s)	Blank(s)	Blank(s)	Localized	16	None	None; diagnosed at autopsy	10	999	Blank(s)	Blank(s)	Blank(s)	Blank(s)	Blank(s)	Blank(s)	Blank(s)	Blank(s)	Blank(s)	Blank(s)	Blank(s)	Blank(s)	Blank(s)	988	0	98	Blank(s)	Liver	N/A not first tumor	N/A not first tumor	30
Insured/No specifics	Widowed	72	1941	2013	December	Female	White	C22.1-Intrahepatic bile duct	8160/3: Cholangiocarcinoma	Well differentiated; Grade I	8.6.3 Carcinoma of liver and intrahepatic bile ducts	VII(b) Hepatic carcinomas	Positive histology	I	T1	N0	M0	Blank(s)	Blank(s)	Blank(s)	Blank(s)	Blank(s)	Localized	60	1 to 3 regional lymph nodes removed	None; diagnosed at autopsy	998	999	Blank(s)	Blank(s)	Blank(s)	Blank(s)	Blank(s)	Blank(s)	Blank(s)	Blank(s)	Blank(s)	Blank(s)	Blank(s)	Blank(s)	Blank(s)	988	1	0	Blank(s)	Alive	N/A not first tumor	N/A not first tumor	36
Insured	Married (including common law)	57	1954	2011	March	Male	Black	C22.0-Liver	8170/3: Hepatocellular carcinoma, NOS	Unknown	8.6.3 Carcinoma of liver and intrahepatic bile ducts	VII(b) Hepatic carcinomas	Positive histology	UNK Stage	TX	N0	M0	Blank(s)	Blank(s)	Blank(s)	Blank(s)	Blank(s)	Localized	0	None	None; diagnosed at autopsy	10	999	Blank(s)	Blank(s)	Blank(s)	Blank(s)	Blank(s)	Blank(s)	Blank(s)	Blank(s)	Blank(s)	Blank(s)	Blank(s)	Blank(s)	Blank(s)	988	0	98	Blank(s)	Miscellaneous Malignant Cancer	N/A not first tumor	N/A not first tumor	17
Blank(s)	Married (including common law)	83	1921	2004	November	Male	Other (American Indian/AK Native, Asian/Pacific Islander)	C22.0-Liver	8170/3: Hepatocellular carcinoma, NOS	Unknown	8.6.3 Carcinoma of liver and intrahepatic bile ducts	VII(b) Hepatic carcinomas	Positive histology	UNK Stage	TX	N0	M0	Blank(s)	Blank(s)	Blank(s)	Blank(s)	Blank(s)	Localized	0	None	None; diagnosed at autopsy	20	999	Blank(s)	Blank(s)	Blank(s)	Blank(s)	Blank(s)	Blank(s)	Blank(s)	Blank(s)	Blank(s)	Blank(s)	Blank(s)	Blank(s)	Blank(s)	988	0	98	Blank(s)	Liver	N/A not first tumor	N/A not first tumor	1
Blank(s)	Married (including common law)	59	1944	2004	January	Male	Other (American Indian/AK Native, Asian/Pacific Islander)	C22.0-Liver	8170/3: Hepatocellular carcinoma, NOS	Well differentiated; Grade I	8.6.3 Carcinoma of liver and intrahepatic bile ducts	VII(b) Hepatic carcinomas	Positive histology	II	T2	N0	M0	Blank(s)	Blank(s)	Blank(s)	Blank(s)	Blank(s)	Localized	61	None	None; diagnosed at autopsy	999	999	Blank(s)	Blank(s)	Blank(s)	Blank(s)	Blank(s)	Blank(s)	Blank(s)	Blank(s)	Blank(s)	Blank(s)	Blank(s)	Blank(s)	Blank(s)	988	0	98	Blank(s)	Alive	Alive or dead of other cause	Alive or dead due to cancer	155
Insured	Married (including common law)	78	1929	2008	January	Male	White	C22.0-Liver	8170/3: Hepatocellular carcinoma, NOS	Unknown	8.6.3 Carcinoma of liver and intrahepatic bile ducts	VII(b) Hepatic carcinomas	Positive histology	IV	T1	N1	M1	Blank(s)	Blank(s)	Blank(s)	Blank(s)	Blank(s)	Distant	0	None	None; diagnosed at autopsy	10	999	Blank(s)	Blank(s)	Blank(s)	Blank(s)	Blank(s)	Blank(s)	Blank(s)	Blank(s)	Blank(s)	Blank(s)	Blank(s)	Blank(s)	Blank(s)	988	0	98	Blank(s)	Liver	N/A not first tumor	N/A not first tumor	1
Insured/No specifics	Married (including common law)	80	1929	2009	December	Male	Other (American Indian/AK Native, Asian/Pacific Islander)	C22.0-Liver	8170/3: Hepatocellular carcinoma, NOS	Unknown	8.6.3 Carcinoma of liver and intrahepatic bile ducts	VII(b) Hepatic carcinomas	Positive histology	UNK Stage	TX	NX	MX	Blank(s)	Blank(s)	Blank(s)	Blank(s)	Blank(s)	Unknown/unstaged	0	None	None; diagnosed at autopsy	999	999	Blank(s)	Blank(s)	Blank(s)	Blank(s)	Blank(s)	Blank(s)	Blank(s)	Blank(s)	Blank(s)	Blank(s)	Blank(s)	Blank(s)	Blank(s)	988	99	99	Blank(s)	Liver	N/A not first tumor	N/A not first tumor	0
Blank(s)	Widowed	77	1927	2005	April	Male	Other (American Indian/AK Native, Asian/Pacific Islander)	C22.0-Liver	8170/3: Hepatocellular carcinoma, NOS	Unknown	8.6.3 Carcinoma of liver and intrahepatic bile ducts	VII(b) Hepatic carcinomas	Positive exfoliative cytology, no positive histology	IIIA	T3	N0	M0	Blank(s)	Blank(s)	Blank(s)	Blank(s)	Blank(s)	Localized	0	None	None; diagnosed at autopsy	10	999	Blank(s)	Blank(s)	Blank(s)	Blank(s)	Blank(s)	Blank(s)	Blank(s)	Blank(s)	Blank(s)	Blank(s)	Blank(s)	Blank(s)	Blank(s)	988	0	98	Blank(s)	Septicemia	N/A not first tumor	N/A not first tumor	2
Insured	Married (including common law)	63	1946	2009	September	Male	White	C22.1-Intrahepatic bile duct	8180/3: Combined hepatocellular carcinoma and cholangiocarcinoma	Unknown	8.6.3 Carcinoma of liver and intrahepatic bile ducts	VII(b) Hepatic carcinomas	Positive histology	I	T1	N0	M0	Blank(s)	Blank(s)	Blank(s)	Blank(s)	Blank(s)	Localized	0	None	None; diagnosed at autopsy	998	999	Blank(s)	Blank(s)	Blank(s)	Blank(s)	Blank(s)	Blank(s)	Blank(s)	Blank(s)	Blank(s)	Blank(s)	Blank(s)	Blank(s)	Blank(s)	988	0	98	Blank(s)	Intrahepatic Bile Duct	N/A not first tumor	N/A not first tumor	5
Insured/No specifics	Married (including common law)	65	1943	2008	June	Male	White	C22.0-Liver	8170/3: Hepatocellular carcinoma, NOS	Unknown	8.6.3 Carcinoma of liver and intrahepatic bile ducts	VII(b) Hepatic carcinomas	Radiography without microscopic confirm	IV	T1	N0	M1	Blank(s)	Blank(s)	Blank(s)	Blank(s)	Blank(s)	Distant	0	None	None; diagnosed at autopsy	998	999	Blank(s)	Blank(s)	Blank(s)	Blank(s)	Blank(s)	Blank(s)	Blank(s)	Blank(s)	Blank(s)	Blank(s)	Blank(s)	Blank(s)	Blank(s)	988	0	98	Blank(s)	Liver	N/A not first tumor	N/A not first tumor	3
Any Medicaid	Married (including common law)	65	1945	2011	June	Male	White	C22.0-Liver	8170/3: Hepatocellular carcinoma, NOS	Moderately differentiated; Grade II	8.6.3 Carcinoma of liver and intrahepatic bile ducts	VII(b) Hepatic carcinomas	Positive histology	II	T2	N0	M0	Blank(s)	Blank(s)	Blank(s)	Blank(s)	Blank(s)	Regional	61	1 to 3 regional lymph nodes removed	None; diagnosed at autopsy	20	1	Blank(s)	Blank(s)	Blank(s)	Blank(s)	Blank(s)	Blank(s)	Blank(s)	Blank(s)	Blank(s)	Blank(s)	Blank(s)	Blank(s)	Blank(s)	988	0	98	Blank(s)	Alive	N/A not first tumor	N/A not first tumor	66
Any Medicaid	Separated	70	1940	2010	October	Female	Other (American Indian/AK Native, Asian/Pacific Islander)	C22.0-Liver	8170/3: Hepatocellular carcinoma, NOS	Unknown	8.6.3 Carcinoma of liver and intrahepatic bile ducts	VII(b) Hepatic carcinomas	Positive histology	IIIA	T3	N0	M0	Blank(s)	Blank(s)	Blank(s)	Blank(s)	Blank(s)	Regional	0	None	None; diagnosed at autopsy	10	999	Blank(s)	Blank(s)	Blank(s)	Blank(s)	Blank(s)	Blank(s)	Blank(s)	Blank(s)	Blank(s)	Blank(s)	Blank(s)	Blank(s)	Blank(s)	988	0	98	Blank(s)	Liver	N/A not first tumor	N/A not first tumor	3
Insured	Married (including common law)	84	1924	2008	February	Male	White	C22.0-Liver	8010/3: Carcinoma, NOS	Unknown	8.6.3 Carcinoma of liver and intrahepatic bile ducts	VII(b) Hepatic carcinomas	Positive histology	II	T2	N0	M0	Blank(s)	Blank(s)	Blank(s)	Blank(s)	Blank(s)	Localized	0	None	None; diagnosed at autopsy	20	999	Blank(s)	Blank(s)	Blank(s)	Blank(s)	Blank(s)	Blank(s)	Blank(s)	Blank(s)	Blank(s)	Blank(s)	Blank(s)	Blank(s)	Blank(s)	988	0	98	Blank(s)	Liver	N/A not first tumor	N/A not first tumor	0
Insured	Married (including common law)	73	1937	2010	October	Male	White	C22.0-Liver	8170/3: Hepatocellular carcinoma, NOS	Moderately differentiated; Grade II	8.6.3 Carcinoma of liver and intrahepatic bile ducts	VII(b) Hepatic carcinomas	Positive histology	IV	T1	N0	M1	Blank(s)	Blank(s)	Blank(s)	Blank(s)	Blank(s)	Distant	0	None	None; diagnosed at autopsy	10	999	Blank(s)	Blank(s)	Blank(s)	Blank(s)	Blank(s)	Blank(s)	Blank(s)	Blank(s)	Blank(s)	Blank(s)	Blank(s)	Blank(s)	Blank(s)	988	0	98	Blank(s)	Liver	N/A not first tumor	N/A not first tumor	3
Blank(s)	Married (including common law)	49	1954	2004	January	Male	Other (American Indian/AK Native, Asian/Pacific Islander)	C22.0-Liver	8170/3: Hepatocellular carcinoma, NOS	Unknown	8.6.3 Carcinoma of liver and intrahepatic bile ducts	VII(b) Hepatic carcinomas	Positive histology	IIIA	T3	N0	M0	Blank(s)	Blank(s)	Blank(s)	Blank(s)	Blank(s)	Localized	0	None	None; diagnosed at autopsy	999	999	Blank(s)	Blank(s)	Blank(s)	Blank(s)	Blank(s)	Blank(s)	Blank(s)	Blank(s)	Blank(s)	Blank(s)	Blank(s)	Blank(s)	Blank(s)	988	0	98	Blank(s)	Liver	Dead (attributable to this cancer dx)	Alive or dead due to cancer	1
Insured	Married (including common law)	86	1928	2014	October	Male	White	C22.0-Liver	8160/3: Cholangiocarcinoma	Unknown	8.6.3 Carcinoma of liver and intrahepatic bile ducts	VII(b) Hepatic carcinomas	Radiography without microscopic confirm	IV	TX	NX	M1	Blank(s)	Blank(s)	Blank(s)	Blank(s)	Blank(s)	Distant	0	None	None; diagnosed at autopsy	998	999	Blank(s)	Blank(s)	Blank(s)	Blank(s)	Blank(s)	Blank(s)	Blank(s)	Blank(s)	Blank(s)	Blank(s)	Blank(s)	Blank(s)	Blank(s)	988	99	99	Blank(s)	Intrahepatic Bile Duct	N/A not first tumor	N/A not first tumor	0
Insured	Married (including common law)	64	1947	2011	September	Female	White	C22.0-Liver	8170/3: Hepatocellular carcinoma, NOS	Unknown	8.6.3 Carcinoma of liver and intrahepatic bile ducts	VII(b) Hepatic carcinomas	Positive histology	IIIC	T2	N1	M0	Blank(s)	Blank(s)	Blank(s)	Blank(s)	Blank(s)	Regional	0	None	None; diagnosed at autopsy	10	1	Blank(s)	Blank(s)	Blank(s)	Blank(s)	Blank(s)	Blank(s)	Blank(s)	Blank(s)	Blank(s)	Blank(s)	Blank(s)	Blank(s)	Blank(s)	988	95	95	Blank(s)	Larynx	N/A not first tumor	N/A not first tumor	7
Insured	Married (including common law)	44	1963	2008	May	Female	Other (American Indian/AK Native, Asian/Pacific Islander)	C22.0-Liver	8170/3: Hepatocellular carcinoma, NOS	Well differentiated; Grade I	8.6.3 Carcinoma of liver and intrahepatic bile ducts	VII(b) Hepatic carcinomas	Positive histology	I	T1	N0	M0	Blank(s)	Blank(s)	Blank(s)	Blank(s)	Blank(s)	Localized	16	None	None; diagnosed at autopsy	20	999	Blank(s)	Blank(s)	Blank(s)	Blank(s)	Blank(s)	Blank(s)	Blank(s)	Blank(s)	Blank(s)	Blank(s)	Blank(s)	Blank(s)	Blank(s)	988	0	98	Blank(s)	Liver	N/A not first tumor	N/A not first tumor	64
Blank(s)	Single (never married)	67	1936	2004	January	Male	Black	C22.0-Liver	8170/3: Hepatocellular carcinoma, NOS	Unknown	8.6.3 Carcinoma of liver and intrahepatic bile ducts	VII(b) Hepatic carcinomas	Positive histology	IV	T3	NX	M1	Blank(s)	Blank(s)	Blank(s)	Blank(s)	Blank(s)	Distant	0	None	None; diagnosed at autopsy	998	999	Blank(s)	Blank(s)	Blank(s)	Blank(s)	Blank(s)	Blank(s)	Blank(s)	Blank(s)	Blank(s)	Blank(s)	Blank(s)	Blank(s)	Blank(s)	988	0	98	Blank(s)	Liver	N/A not first tumor	N/A not first tumor	5
Blank(s)	Married (including common law)	61	1943	2004	May	Male	Black	C22.0-Liver	8170/3: Hepatocellular carcinoma, NOS	Unknown	8.6.3 Carcinoma of liver and intrahepatic bile ducts	VII(b) Hepatic carcinomas	Positive exfoliative cytology, no positive histology	UNK Stage	TX	NX	MX	Blank(s)	Blank(s)	Blank(s)	Blank(s)	Blank(s)	Unknown/unstaged	0	None	None; diagnosed at autopsy	999	999	Blank(s)	Blank(s)	Blank(s)	Blank(s)	Blank(s)	Blank(s)	Blank(s)	Blank(s)	Blank(s)	Blank(s)	Blank(s)	Blank(s)	Blank(s)	988	0	98	Blank(s)	Liver	N/A not first tumor	N/A not first tumor	2
Insured	Married (including common law)	74	1935	2009	June	Male	Black	C22.0-Liver	8170/3: Hepatocellular carcinoma, NOS	Unknown	8.6.3 Carcinoma of liver and intrahepatic bile ducts	VII(b) Hepatic carcinomas	Positive histology	IV	T2	N0	M1	Blank(s)	Blank(s)	Blank(s)	Blank(s)	Blank(s)	Distant	0	None	None; diagnosed at autopsy	10	999	Blank(s)	Blank(s)	Blank(s)	Blank(s)	Blank(s)	Blank(s)	Blank(s)	Blank(s)	Blank(s)	Blank(s)	Blank(s)	Blank(s)	Blank(s)	988	0	98	Blank(s)	Lung and Bronchus	N/A not first tumor	N/A not first tumor	4
Insured/No specifics	Married (including common law)	90	1918	2008	December	Female	White	C22.1-Intrahepatic bile duct	8160/3: Cholangiocarcinoma	Unknown	8.6.3 Carcinoma of liver and intrahepatic bile ducts	VII(b) Hepatic carcinomas	Positive histology	I	T1	N0	M0	Blank(s)	Blank(s)	Blank(s)	Blank(s)	Blank(s)	Localized	0	None	None; diagnosed at autopsy	998	999	Blank(s)	Blank(s)	Blank(s)	Blank(s)	Blank(s)	Blank(s)	Blank(s)	Blank(s)	Blank(s)	Blank(s)	Blank(s)	Blank(s)	Blank(s)	988	0	98	Blank(s)	Intrahepatic Bile Duct	N/A not first tumor	N/A not first tumor	30
Blank(s)	Married (including common law)	56	1949	2006	April	Male	Other (American Indian/AK Native, Asian/Pacific Islander)	C22.0-Liver	8170/3: Hepatocellular carcinoma, NOS	Unknown	8.6.3 Carcinoma of liver and intrahepatic bile ducts	VII(b) Hepatic carcinomas	Unknown	IV	TX	N0	M1	Blank(s)	Blank(s)	Blank(s)	Blank(s)	Blank(s)	Distant	0	None	None; diagnosed at autopsy	999	999	Blank(s)	Blank(s)	Blank(s)	Blank(s)	Blank(s)	Blank(s)	Blank(s)	Blank(s)	Blank(s)	Blank(s)	Blank(s)	Blank(s)	Blank(s)	988	0	98	Blank(s)	Liver	N/A not first tumor	N/A not first tumor	1
Blank(s)	Divorced	54	1949	2004	January	Male	Black	C22.0-Liver	8170/3: Hepatocellular carcinoma, NOS	Unknown	8.6.3 Carcinoma of liver and intrahepatic bile ducts	VII(b) Hepatic carcinomas	Radiography without microscopic confirm	UNK Stage	T3	NX	MX	Blank(s)	Blank(s)	Blank(s)	Blank(s)	Blank(s)	Regional	0	None	None; diagnosed at autopsy	10	999	Blank(s)	Blank(s)	Blank(s)	Blank(s)	Blank(s)	Blank(s)	Blank(s)	Blank(s)	Blank(s)	Blank(s)	Blank(s)	Blank(s)	Blank(s)	988	0	98	Blank(s)	Liver	Dead (attributable to this cancer dx)	Alive or dead due to cancer	2
Blank(s)	Married (including common law)	58	1948	2006	July	Male	White	C22.0-Liver	8170/3: Hepatocellular carcinoma, NOS	Moderately differentiated; Grade II	8.6.3 Carcinoma of liver and intrahepatic bile ducts	VII(b) Hepatic carcinomas	Positive histology	II	T2	N0	M0	Blank(s)	Blank(s)	Blank(s)	Blank(s)	Blank(s)	Localized	17	None	None; diagnosed at autopsy	10	0	Blank(s)	Blank(s)	Blank(s)	Blank(s)	Blank(s)	Blank(s)	Blank(s)	Blank(s)	Blank(s)	Blank(s)	Blank(s)	Blank(s)	Blank(s)	988	0	98	Blank(s)	Liver	N/A not first tumor	N/A not first tumor	43
Any Medicaid	Married (including common law)	70	1937	2007	October	Male	Other (American Indian/AK Native, Asian/Pacific Islander)	C22.1-Intrahepatic bile duct	8160/3: Cholangiocarcinoma	Unknown	8.6.3 Carcinoma of liver and intrahepatic bile ducts	VII(b) Hepatic carcinomas	Positive histology	UNK Stage	TX	NX	MX	Blank(s)	Blank(s)	Blank(s)	Blank(s)	Blank(s)	Unknown/unstaged	0	None	None; diagnosed at autopsy	999	999	Blank(s)	Blank(s)	Blank(s)	Blank(s)	Blank(s)	Blank(s)	Blank(s)	Blank(s)	Blank(s)	Blank(s)	Blank(s)	Blank(s)	Blank(s)	988	0	98	Blank(s)	Diseases of Heart	N/A not first tumor	N/A not first tumor	13
Blank(s)	Divorced	49	1955	2004	November	Female	White	C22.1-Intrahepatic bile duct	8160/3: Cholangiocarcinoma	Moderately differentiated; Grade II	8.6.3 Carcinoma of liver and intrahepatic bile ducts	VII(b) Hepatic carcinomas	Positive histology	IIIA	T3	N0	M0	Blank(s)	Blank(s)	Blank(s)	Blank(s)	Blank(s)	Localized	36	1 to 3 regional lymph nodes removed	None; diagnosed at autopsy	20	999	Blank(s)	Blank(s)	Blank(s)	Blank(s)	Blank(s)	Blank(s)	Blank(s)	Blank(s)	Blank(s)	Blank(s)	Blank(s)	Blank(s)	Blank(s)	988	1	0	Blank(s)	Liver	Dead (attributable to this cancer dx)	Alive or dead due to cancer	13
Blank(s)	Married (including common law)	60	1945	2005	May	Male	Other (American Indian/AK Native, Asian/Pacific Islander)	C22.0-Liver	8170/3: Hepatocellular carcinoma, NOS	Unknown	8.6.3 Carcinoma of liver and intrahepatic bile ducts	VII(b) Hepatic carcinomas	Positive histology	I	T1	N0	M0	Blank(s)	Blank(s)	Blank(s)	Blank(s)	Blank(s)	Localized	0	None	None; diagnosed at autopsy	999	999	Blank(s)	Blank(s)	Blank(s)	Blank(s)	Blank(s)	Blank(s)	Blank(s)	Blank(s)	Blank(s)	Blank(s)	Blank(s)	Blank(s)	Blank(s)	988	0	98	Blank(s)	Alive	N/A not first tumor	N/A not first tumor	8
Insurance status unknown	Unknown	74	1932	2007	April	Female	White	C22.0-Liver	8170/3: Hepatocellular carcinoma, NOS	Unknown	8.6.3 Carcinoma of liver and intrahepatic bile ducts	VII(b) Hepatic carcinomas	Positive histology	IV	T1	N0	M1	Blank(s)	Blank(s)	Blank(s)	Blank(s)	Blank(s)	Distant	0	None	None; diagnosed at autopsy	999	999	Blank(s)	Blank(s)	Blank(s)	Blank(s)	Blank(s)	Blank(s)	Blank(s)	Blank(s)	Blank(s)	Blank(s)	Blank(s)	Blank(s)	Blank(s)	988	0	98	Blank(s)	Myeloma	N/A not first tumor	N/A not first tumor	Unknown
Blank(s)	Married (including common law)	65	1939	2004	June	Male	Other (American Indian/AK Native, Asian/Pacific Islander)	C22.0-Liver	8170/3: Hepatocellular carcinoma, NOS	Unknown	8.6.3 Carcinoma of liver and intrahepatic bile ducts	VII(b) Hepatic carcinomas	Radiography without microscopic confirm	I	T1	N0	M0	Blank(s)	Blank(s)	Blank(s)	Blank(s)	Blank(s)	Localized	0	None	None; diagnosed at autopsy	10	999	Blank(s)	Blank(s)	Blank(s)	Blank(s)	Blank(s)	Blank(s)	Blank(s)	Blank(s)	Blank(s)	Blank(s)	Blank(s)	Blank(s)	Blank(s)	988	0	98	Blank(s)	Liver	Dead (attributable to this cancer dx)	Alive or dead due to cancer	6
Blank(s)	Married (including common law)	67	1936	2004	June	Male	Other (American Indian/AK Native, Asian/Pacific Islander)	C22.0-Liver	8170/3: Hepatocellular carcinoma, NOS	Well differentiated; Grade I	8.6.3 Carcinoma of liver and intrahepatic bile ducts	VII(b) Hepatic carcinomas	Positive histology	II	T2	N0	M0	Blank(s)	Blank(s)	Blank(s)	Blank(s)	Blank(s)	Regional	17	None	None; diagnosed at autopsy	10	999	Blank(s)	Blank(s)	Blank(s)	Blank(s)	Blank(s)	Blank(s)	Blank(s)	Blank(s)	Blank(s)	Blank(s)	Blank(s)	Blank(s)	Blank(s)	988	0	98	Blank(s)	Liver	Dead (attributable to this cancer dx)	Alive or dead due to cancer	6
Blank(s)	Widowed	73	1930	2004	June	Female	Other (American Indian/AK Native, Asian/Pacific Islander)	C22.0-Liver	8180/3: Combined hepatocellular carcinoma and cholangiocarcinoma	Unknown	8.6.3 Carcinoma of liver and intrahepatic bile ducts	VII(b) Hepatic carcinomas	Positive histology	I	T1	N0	M0	Blank(s)	Blank(s)	Blank(s)	Blank(s)	Blank(s)	Localized	16	None	None; diagnosed at autopsy	10	999	Blank(s)	Blank(s)	Blank(s)	Blank(s)	Blank(s)	Blank(s)	Blank(s)	Blank(s)	Blank(s)	Blank(s)	Blank(s)	Blank(s)	Blank(s)	988	0	98	Blank(s)	Liver	Dead (attributable to this cancer dx)	Alive or dead due to cancer	50
Blank(s)	Widowed	72	1931	2004	April	Female	Other (American Indian/AK Native, Asian/Pacific Islander)	C22.0-Liver	8170/3: Hepatocellular carcinoma, NOS	Unknown	8.6.3 Carcinoma of liver and intrahepatic bile ducts	VII(b) Hepatic carcinomas	Radiography without microscopic confirm	UNK Stage	TX	NX	M0	Blank(s)	Blank(s)	Blank(s)	Blank(s)	Blank(s)	Localized	0	None	None; diagnosed at autopsy	998	999	Blank(s)	Blank(s)	Blank(s)	Blank(s)	Blank(s)	Blank(s)	Blank(s)	Blank(s)	Blank(s)	Blank(s)	Blank(s)	Blank(s)	Blank(s)	988	0	98	Blank(s)	Liver	Dead (attributable to this cancer dx)	Alive or dead due to cancer	1
Blank(s)	Married (including common law)	59	1945	2004	May	Male	Other (American Indian/AK Native, Asian/Pacific Islander)	C22.0-Liver	8170/3: Hepatocellular carcinoma, NOS	Well differentiated; Grade I	8.6.3 Carcinoma of liver and intrahepatic bile ducts	VII(b) Hepatic carcinomas	Positive histology	IIIA	T3	N0	M0	Blank(s)	Blank(s)	Blank(s)	Blank(s)	Blank(s)	Regional	0	None	None; diagnosed at autopsy	20	999	Blank(s)	Blank(s)	Blank(s)	Blank(s)	Blank(s)	Blank(s)	Blank(s)	Blank(s)	Blank(s)	Blank(s)	Blank(s)	Blank(s)	Blank(s)	988	0	98	Blank(s)	Liver	Dead (attributable to this cancer dx)	Alive or dead due to cancer	18
Blank(s)	Married (including common law)	81	1922	2004	April	Female	White	C22.0-Liver	8170/3: Hepatocellular carcinoma, NOS	Well differentiated; Grade I	8.6.3 Carcinoma of liver and intrahepatic bile ducts	VII(b) Hepatic carcinomas	Positive exfoliative cytology, no positive histology	IV	T3	NX	M1	Blank(s)	Blank(s)	Blank(s)	Blank(s)	Blank(s)	Distant	0	None	None; diagnosed at autopsy	10	999	Blank(s)	Blank(s)	Blank(s)	Blank(s)	Blank(s)	Blank(s)	Blank(s)	Blank(s)	Blank(s)	Blank(s)	Blank(s)	Blank(s)	Blank(s)	988	0	98	Blank(s)	Liver	Dead (attributable to this cancer dx)	Alive or dead due to cancer	4
Blank(s)	Married (including common law)	71	1932	2004	January	Male	Other (American Indian/AK Native, Asian/Pacific Islander)	C22.0-Liver	8170/3: Hepatocellular carcinoma, NOS	Unknown	8.6.3 Carcinoma of liver and intrahepatic bile ducts	VII(b) Hepatic carcinomas	Radiography without microscopic confirm	IV	T3	NX	M1	Blank(s)	Blank(s)	Blank(s)	Blank(s)	Blank(s)	Distant	0	None	None; diagnosed at autopsy	10	999	Blank(s)	Blank(s)	Blank(s)	Blank(s)	Blank(s)	Blank(s)	Blank(s)	Blank(s)	Blank(s)	Blank(s)	Blank(s)	Blank(s)	Blank(s)	988	0	98	Blank(s)	Liver	Dead (attributable to this cancer dx)	Alive or dead due to cancer	4
Blank(s)	Married (including common law)	57	1947	2004	August	Female	Other (American Indian/AK Native, Asian/Pacific Islander)	C22.0-Liver	8170/3: Hepatocellular carcinoma, NOS	Moderately differentiated; Grade II	8.6.3 Carcinoma of liver and intrahepatic bile ducts	VII(b) Hepatic carcinomas	Positive histology	IV	T4	N0	M1	Blank(s)	Blank(s)	Blank(s)	Blank(s)	Blank(s)	Distant	36	None	None; diagnosed at autopsy	10	0	Blank(s)	Blank(s)	Blank(s)	Blank(s)	Blank(s)	Blank(s)	Blank(s)	Blank(s)	Blank(s)	Blank(s)	Blank(s)	Blank(s)	Blank(s)	988	0	98	Blank(s)	Liver	Dead (attributable to this cancer dx)	Alive or dead due to cancer	8
Blank(s)	Married (including common law)	46	1957	2004	February	Female	White	C22.0-Liver	8170/3: Hepatocellular carcinoma, NOS	Well differentiated; Grade I	8.6.3 Carcinoma of liver and intrahepatic bile ducts	VII(b) Hepatic carcinomas	Positive histology	I	T1	N0	M0	Blank(s)	Blank(s)	Blank(s)	Blank(s)	Blank(s)	Localized	61	None	None; diagnosed at autopsy	20	1	Blank(s)	Blank(s)	Blank(s)	Blank(s)	Blank(s)	Blank(s)	Blank(s)	Blank(s)	Blank(s)	Blank(s)	Blank(s)	Blank(s)	Blank(s)	988	0	98	Blank(s)	Other Infectious and Parasitic Diseases including HIV	Alive or dead of other cause	Dead (attributable to causes other than this cancer dx)	6
Blank(s)	Married (including common law)	73	1931	2004	August	Female	Other (American Indian/AK Native, Asian/Pacific Islander)	C22.0-Liver	8170/3: Hepatocellular carcinoma, NOS	Unknown	8.6.3 Carcinoma of liver and intrahepatic bile ducts	VII(b) Hepatic carcinomas	Positive histology	I	T1	N0	M0	Blank(s)	Blank(s)	Blank(s)	Blank(s)	Blank(s)	Localized	16	None	None; diagnosed at autopsy	20	999	Blank(s)	Blank(s)	Blank(s)	Blank(s)	Blank(s)	Blank(s)	Blank(s)	Blank(s)	Blank(s)	Blank(s)	Blank(s)	Blank(s)	Blank(s)	988	0	98	Blank(s)	Liver	Dead (attributable to this cancer dx)	Alive or dead due to cancer	43
Blank(s)	Divorced	84	1919	2004	April	Female	White	C22.0-Liver	8170/3: Hepatocellular carcinoma, NOS	Unknown	8.6.3 Carcinoma of liver and intrahepatic bile ducts	VII(b) Hepatic carcinomas	Radiography without microscopic confirm	I	T1	N0	M0	Blank(s)	Blank(s)	Blank(s)	Blank(s)	Blank(s)	Localized	0	None	None; diagnosed at autopsy	998	999	Blank(s)	Blank(s)	Blank(s)	Blank(s)	Blank(s)	Blank(s)	Blank(s)	Blank(s)	Blank(s)	Blank(s)	Blank(s)	Blank(s)	Blank(s)	988	0	98	Blank(s)	Liver	Dead (attributable to this cancer dx)	Alive or dead due to cancer	6
Blank(s)	Single (never married)	59	1944	2004	September	Male	White	C22.0-Liver	8170/3: Hepatocellular carcinoma, NOS	Unknown	8.6.3 Carcinoma of liver and intrahepatic bile ducts	VII(b) Hepatic carcinomas	Positive histology	UNK Stage	TX	N0	M0	Blank(s)	Blank(s)	Blank(s)	Blank(s)	Blank(s)	Regional	0	None	None; diagnosed at autopsy	10	999	Blank(s)	Blank(s)	Blank(s)	Blank(s)	Blank(s)	Blank(s)	Blank(s)	Blank(s)	Blank(s)	Blank(s)	Blank(s)	Blank(s)	Blank(s)	988	0	98	Blank(s)	Other Cause of Death	Alive or dead of other cause	Dead (attributable to causes other than this cancer dx)	1
Blank(s)	Single (never married)	41	1962	2004	August	Male	Black	C22.0-Liver	8170/3: Hepatocellular carcinoma, NOS	Unknown	8.6.3 Carcinoma of liver and intrahepatic bile ducts	VII(b) Hepatic carcinomas	Positive histology	IIINOS	T3	NX	M0	Blank(s)	Blank(s)	Blank(s)	Blank(s)	Blank(s)	Regional	0	None	None; diagnosed at autopsy	10	999	Blank(s)	Blank(s)	Blank(s)	Blank(s)	Blank(s)	Blank(s)	Blank(s)	Blank(s)	Blank(s)	Blank(s)	Blank(s)	Blank(s)	Blank(s)	988	0	98	Blank(s)	Liver	Dead (attributable to this cancer dx)	Alive or dead due to cancer	4
Blank(s)	Single (never married)	47	1957	2004	June	Male	Other (American Indian/AK Native, Asian/Pacific Islander)	C22.0-Liver	8190/3: Trabecular adenocarcinoma	Moderately differentiated; Grade II	8.6.3 Carcinoma of liver and intrahepatic bile ducts	VII(b) Hepatic carcinomas	Positive histology	II	T2	N0	M0	Blank(s)	Blank(s)	Blank(s)	Blank(s)	Blank(s)	Regional	26	1 to 3 regional lymph nodes removed	None; diagnosed at autopsy	20	0	Blank(s)	Blank(s)	Blank(s)	Blank(s)	Blank(s)	Blank(s)	Blank(s)	Blank(s)	Blank(s)	Blank(s)	Blank(s)	Blank(s)	Blank(s)	988	1	0	Blank(s)	Alive	Alive or dead of other cause	Alive or dead due to cancer	150
Blank(s)	Single (never married)	0	2003	2004	May	Female	White	C22.0-Liver	8970/3: Hepatoblastoma	Unknown	9.1.3 Other pediatric and embryonal tumors, NOS	VII(a) Hepatoblastoma	Positive histology	NA	NA	NA	NA	Blank(s)	Blank(s)	Blank(s)	Blank(s)	Blank(s)	Regional	37	1 to 3 regional lymph nodes removed	None; diagnosed at autopsy	10	999	Blank(s)	Blank(s)	Blank(s)	Blank(s)	Blank(s)	Blank(s)	Blank(s)	Blank(s)	Blank(s)	Blank(s)	Blank(s)	Blank(s)	Blank(s)	988	0	98	Blank(s)	Alive	Alive or dead of other cause	Alive or dead due to cancer	151
Blank(s)	Married (including common law)	73	1931	2004	April	Male	Other (American Indian/AK Native, Asian/Pacific Islander)	C22.0-Liver	8170/3: Hepatocellular carcinoma, NOS	Unknown	8.6.3 Carcinoma of liver and intrahepatic bile ducts	VII(b) Hepatic carcinomas	Radiography without microscopic confirm	UNK Stage	T3	NX	MX	Blank(s)	Blank(s)	Blank(s)	Blank(s)	Blank(s)	Localized	0	None	None; diagnosed at autopsy	999	999	Blank(s)	Blank(s)	Blank(s)	Blank(s)	Blank(s)	Blank(s)	Blank(s)	Blank(s)	Blank(s)	Blank(s)	Blank(s)	Blank(s)	Blank(s)	988	0	98	Blank(s)	Liver	Dead (attributable to this cancer dx)	Alive or dead due to cancer	5
Any Medicaid	Married (including common law)	59	1950	2010	January	Male	Other (American Indian/AK Native, Asian/Pacific Islander)	C22.0-Liver	8190/3: Trabecular adenocarcinoma	Moderately differentiated; Grade II	8.6.3 Carcinoma of liver and intrahepatic bile ducts	VII(b) Hepatic carcinomas	Positive histology	II	T2	N0	M0	Blank(s)	Blank(s)	Blank(s)	Blank(s)	Blank(s)	Localized	36	1 to 3 regional lymph nodes removed	None; diagnosed at autopsy	10	0	Blank(s)	Blank(s)	Blank(s)	Blank(s)	Blank(s)	Blank(s)	Blank(s)	Blank(s)	Blank(s)	Blank(s)	Blank(s)	Blank(s)	Blank(s)	988	3	0	Blank(s)	Liver	N/A not first tumor	N/A not first tumor	75
Blank(s)	Married (including common law)	74	1930	2004	Blank(s)	Male	Other (American Indian/AK Native, Asian/Pacific Islander)	C22.0-Liver	8010/3: Carcinoma, NOS	Unknown	8.6.3 Carcinoma of liver and intrahepatic bile ducts	VII(b) Hepatic carcinomas	Positive exfoliative cytology, no positive histology	UNK Stage	T1	NX	M0	Blank(s)	Blank(s)	Blank(s)	Blank(s)	Blank(s)	Localized	0	None	None; diagnosed at autopsy	998	999	Blank(s)	Blank(s)	Blank(s)	Blank(s)	Blank(s)	Blank(s)	Blank(s)	Blank(s)	Blank(s)	Blank(s)	Blank(s)	Blank(s)	Blank(s)	988	0	98	Blank(s)	Liver	Dead (attributable to this cancer dx)	Alive or dead due to cancer	1
Blank(s)	Married (including common law)	81	1923	2004	September	Male	Other (American Indian/AK Native, Asian/Pacific Islander)	C22.0-Liver	8170/3: Hepatocellular carcinoma, NOS	Unknown	8.6.3 Carcinoma of liver and intrahepatic bile ducts	VII(b) Hepatic carcinomas	Positive histology	UNK Stage	TX	NX	M0	Blank(s)	Blank(s)	Blank(s)	Blank(s)	Blank(s)	Regional	0	None	None; diagnosed at autopsy	10	999	Blank(s)	Blank(s)	Blank(s)	Blank(s)	Blank(s)	Blank(s)	Blank(s)	Blank(s)	Blank(s)	Blank(s)	Blank(s)	Blank(s)	Blank(s)	988	0	98	Blank(s)	Diseases of Heart	Alive or dead of other cause	Dead (attributable to causes other than this cancer dx)	22
Blank(s)	Married (including common law)	67	1937	2004	October	Male	Other (American Indian/AK Native, Asian/Pacific Islander)	C22.0-Liver	8170/3: Hepatocellular carcinoma, NOS	Well differentiated; Grade I	8.6.3 Carcinoma of liver and intrahepatic bile ducts	VII(b) Hepatic carcinomas	Positive histology	I	T1	N0	M0	Blank(s)	Blank(s)	Blank(s)	Blank(s)	Blank(s)	Localized	36	None	None; diagnosed at autopsy	10	0	Blank(s)	Blank(s)	Blank(s)	Blank(s)	Blank(s)	Blank(s)	Blank(s)	Blank(s)	Blank(s)	Blank(s)	Blank(s)	Blank(s)	Blank(s)	988	0	98	Blank(s)	Lung and Bronchus	Dead (attributable to this cancer dx)	Alive or dead due to cancer	67
Blank(s)	Married (including common law)	78	1926	2004	May	Female	Other (American Indian/AK Native, Asian/Pacific Islander)	C22.0-Liver	8190/3: Trabecular adenocarcinoma	Moderately differentiated; Grade II	8.6.3 Carcinoma of liver and intrahepatic bile ducts	VII(b) Hepatic carcinomas	Positive histology	UNK Stage	TX	N0	M0	Blank(s)	Blank(s)	Blank(s)	Blank(s)	Blank(s)	Regional	0	None	None; diagnosed at autopsy	999	999	Blank(s)	Blank(s)	Blank(s)	Blank(s)	Blank(s)	Blank(s)	Blank(s)	Blank(s)	Blank(s)	Blank(s)	Blank(s)	Blank(s)	Blank(s)	988	0	98	Blank(s)	Liver	Dead (attributable to this cancer dx)	Alive or dead due to cancer	0
Blank(s)	Unknown	90	1913	2004	August	Female	White	C22.0-Liver	8170/3: Hepatocellular carcinoma, NOS	Moderately differentiated; Grade II	8.6.3 Carcinoma of liver and intrahepatic bile ducts	VII(b) Hepatic carcinomas	Positive exfoliative cytology, no positive histology	UNK Stage	TX	NX	M0	Blank(s)	Blank(s)	Blank(s)	Blank(s)	Blank(s)	Unknown/unstaged	0	None	None; diagnosed at autopsy	10	999	Blank(s)	Blank(s)	Blank(s)	Blank(s)	Blank(s)	Blank(s)	Blank(s)	Blank(s)	Blank(s)	Blank(s)	Blank(s)	Blank(s)	Blank(s)	988	0	98	Blank(s)	Liver	Dead (attributable to this cancer dx)	Alive or dead due to cancer	0
Blank(s)	Married (including common law)	79	1924	2004	August	Male	Other (American Indian/AK Native, Asian/Pacific Islander)	C22.0-Liver	8170/3: Hepatocellular carcinoma, NOS	Unknown	8.6.3 Carcinoma of liver and intrahepatic bile ducts	VII(b) Hepatic carcinomas	Positive histology	I	T1	N0	M0	Blank(s)	Blank(s)	Blank(s)	Blank(s)	Blank(s)	Localized	23	None	None; diagnosed at autopsy	20	999	Blank(s)	Blank(s)	Blank(s)	Blank(s)	Blank(s)	Blank(s)	Blank(s)	Blank(s)	Blank(s)	Blank(s)	Blank(s)	Blank(s)	Blank(s)	988	0	98	Blank(s)	Alive	Alive or dead of other cause	Alive or dead due to cancer	148
Blank(s)	Married (including common law)	66	1937	2004	August	Female	Other (American Indian/AK Native, Asian/Pacific Islander)	C22.0-Liver	8170/3: Hepatocellular carcinoma, NOS	Unknown	8.6.3 Carcinoma of liver and intrahepatic bile ducts	VII(b) Hepatic carcinomas	Positive histology	I	T1	N0	M0	Blank(s)	Blank(s)	Blank(s)	Blank(s)	Blank(s)	Localized	61	1 to 3 regional lymph nodes removed	None; diagnosed at autopsy	999	0	Blank(s)	Blank(s)	Blank(s)	Blank(s)	Blank(s)	Blank(s)	Blank(s)	Blank(s)	Blank(s)	Blank(s)	Blank(s)	Blank(s)	Blank(s)	988	1	0	Blank(s)	Alive	Alive or dead of other cause	Alive or dead due to cancer	148
Insured	Single (never married)	55	1956	2011	September	Male	White	C22.0-Liver	8170/3: Hepatocellular carcinoma, NOS	Moderately differentiated; Grade II	8.6.3 Carcinoma of liver and intrahepatic bile ducts	VII(b) Hepatic carcinomas	Positive histology	IIIA	T3	N0	M0	Blank(s)	Blank(s)	Blank(s)	Blank(s)	Blank(s)	Regional	23	None	None; diagnosed at autopsy	10	1	Blank(s)	Blank(s)	Blank(s)	Blank(s)	Blank(s)	Blank(s)	Blank(s)	Blank(s)	Blank(s)	Blank(s)	Blank(s)	Blank(s)	Blank(s)	988	0	98	Blank(s)	Colon excluding Rectum	N/A not first tumor	N/A not first tumor	22
Blank(s)	Married (including common law)	82	1922	2004	April	Female	Other (American Indian/AK Native, Asian/Pacific Islander)	C22.0-Liver	8170/3: Hepatocellular carcinoma, NOS	Unknown	8.6.3 Carcinoma of liver and intrahepatic bile ducts	VII(b) Hepatic carcinomas	Positive exfoliative cytology, no positive histology	I	T1	N0	M0	Blank(s)	Blank(s)	Blank(s)	Blank(s)	Blank(s)	Localized	0	None	None; diagnosed at autopsy	20	999	Blank(s)	Blank(s)	Blank(s)	Blank(s)	Blank(s)	Blank(s)	Blank(s)	Blank(s)	Blank(s)	Blank(s)	Blank(s)	Blank(s)	Blank(s)	988	0	98	Blank(s)	Liver	Dead (attributable to this cancer dx)	Alive or dead due to cancer	20
Blank(s)	Married (including common law)	54	1949	2004	April	Male	Other (American Indian/AK Native, Asian/Pacific Islander)	C22.0-Liver	8170/3: Hepatocellular carcinoma, NOS	Moderately differentiated; Grade II	8.6.3 Carcinoma of liver and intrahepatic bile ducts	VII(b) Hepatic carcinomas	Positive histology	II	T2	N0	M0	Blank(s)	Blank(s)	Blank(s)	Blank(s)	Blank(s)	Localized	36	None	None; diagnosed at autopsy	20	0	Blank(s)	Blank(s)	Blank(s)	Blank(s)	Blank(s)	Blank(s)	Blank(s)	Blank(s)	Blank(s)	Blank(s)	Blank(s)	Blank(s)	Blank(s)	988	0	98	Blank(s)	Liver	Dead (attributable to this cancer dx)	Alive or dead due to cancer	68
Blank(s)	Married (including common law)	64	1939	2004	March	Male	White	C22.0-Liver	8170/3: Hepatocellular carcinoma, NOS	Unknown	8.6.3 Carcinoma of liver and intrahepatic bile ducts	VII(b) Hepatic carcinomas	Positive histology	UNK Stage	T1	NX	MX	Blank(s)	Blank(s)	Blank(s)	Blank(s)	Blank(s)	Regional	0	None	None; diagnosed at autopsy	997	999	Blank(s)	Blank(s)	Blank(s)	Blank(s)	Blank(s)	Blank(s)	Blank(s)	Blank(s)	Blank(s)	Blank(s)	Blank(s)	Blank(s)	Blank(s)	988	0	98	Blank(s)	Liver	Dead (attributable to this cancer dx)	Alive or dead due to cancer	1
Blank(s)	Married (including common law)	34	1969	2004	May	Male	Other (American Indian/AK Native, Asian/Pacific Islander)	C22.0-Liver	8170/3: Hepatocellular carcinoma, NOS	Unknown	8.6.3 Carcinoma of liver and intrahepatic bile ducts	VII(b) Hepatic carcinomas	Positive histology	I	T1	N0	M0	Blank(s)	Blank(s)	Blank(s)	Blank(s)	Blank(s)	Localized	22	None	None; diagnosed at autopsy	20	999	Blank(s)	Blank(s)	Blank(s)	Blank(s)	Blank(s)	Blank(s)	Blank(s)	Blank(s)	Blank(s)	Blank(s)	Blank(s)	Blank(s)	Blank(s)	988	0	98	Blank(s)	Alive	Alive or dead of other cause	Alive or dead due to cancer	151
Blank(s)	Married (including common law)	55	1949	2005	January	Male	Other (American Indian/AK Native, Asian/Pacific Islander)	C22.0-Liver	8170/3: Hepatocellular carcinoma, NOS	Unknown	8.6.3 Carcinoma of liver and intrahepatic bile ducts	VII(b) Hepatic carcinomas	Positive histology	I	T1	N0	M0	Blank(s)	Blank(s)	Blank(s)	Blank(s)	Blank(s)	Localized	0	None	None; diagnosed at autopsy	999	999	Blank(s)	Blank(s)	Blank(s)	Blank(s)	Blank(s)	Blank(s)	Blank(s)	Blank(s)	Blank(s)	Blank(s)	Blank(s)	Blank(s)	Blank(s)	988	0	98	Blank(s)	Miscellaneous Malignant Cancer	N/A not first tumor	N/A not first tumor	11
Blank(s)	Single (never married)	70	1934	2004	June	Male	White	C22.0-Liver	8170/3: Hepatocellular carcinoma, NOS	Unknown	8.6.3 Carcinoma of liver and intrahepatic bile ducts	VII(b) Hepatic carcinomas	Radiography without microscopic confirm	IV	T4	NX	M1	Blank(s)	Blank(s)	Blank(s)	Blank(s)	Blank(s)	Distant	0	None	None; diagnosed at autopsy	10	999	Blank(s)	Blank(s)	Blank(s)	Blank(s)	Blank(s)	Blank(s)	Blank(s)	Blank(s)	Blank(s)	Blank(s)	Blank(s)	Blank(s)	Blank(s)	988	0	98	Blank(s)	Liver	Dead (attributable to this cancer dx)	Alive or dead due to cancer	0
Blank(s)	Married (including common law)	47	1956	2004	August	Male	White	C22.0-Liver	8170/3: Hepatocellular carcinoma, NOS	Unknown	8.6.3 Carcinoma of liver and intrahepatic bile ducts	VII(b) Hepatic carcinomas	Positive exfoliative cytology, no positive histology	IIIA	T3	N0	M0	Blank(s)	Blank(s)	Blank(s)	Blank(s)	Blank(s)	Localized	0	None	None; diagnosed at autopsy	10	999	Blank(s)	Blank(s)	Blank(s)	Blank(s)	Blank(s)	Blank(s)	Blank(s)	Blank(s)	Blank(s)	Blank(s)	Blank(s)	Blank(s)	Blank(s)	988	0	98	Blank(s)	Other Cause of Death	Alive or dead of other cause	Dead (attributable to causes other than this cancer dx)	10
Blank(s)	Widowed	86	1917	2004	July	Female	White	C22.0-Liver	8170/3: Hepatocellular carcinoma, NOS	Unknown	8.6.3 Carcinoma of liver and intrahepatic bile ducts	VII(b) Hepatic carcinomas	Positive histology	IV	T1	NX	M1	Blank(s)	Blank(s)	Blank(s)	Blank(s)	Blank(s)	Distant	0	None	None; diagnosed at autopsy	999	999	Blank(s)	Blank(s)	Blank(s)	Blank(s)	Blank(s)	Blank(s)	Blank(s)	Blank(s)	Blank(s)	Blank(s)	Blank(s)	Blank(s)	Blank(s)	988	0	98	Blank(s)	Liver	Dead (attributable to this cancer dx)	Alive or dead due to cancer	33
Blank(s)	Divorced	60	1943	2004	August	Female	White	C22.0-Liver	8170/3: Hepatocellular carcinoma, NOS	Poorly differentiated; Grade III	8.6.3 Carcinoma of liver and intrahepatic bile ducts	VII(b) Hepatic carcinomas	Positive histology	IV	T1	NX	M1	Blank(s)	Blank(s)	Blank(s)	Blank(s)	Blank(s)	Distant	0	None	None; diagnosed at autopsy	999	999	Blank(s)	Blank(s)	Blank(s)	Blank(s)	Blank(s)	Blank(s)	Blank(s)	Blank(s)	Blank(s)	Blank(s)	Blank(s)	Blank(s)	Blank(s)	988	0	98	Blank(s)	Miscellaneous Malignant Cancer	Dead (attributable to this cancer dx)	Alive or dead due to cancer	0
Blank(s)	Divorced	70	1933	2004	August	Male	Other (American Indian/AK Native, Asian/Pacific Islander)	C22.0-Liver	8170/3: Hepatocellular carcinoma, NOS	Poorly differentiated; Grade III	8.6.3 Carcinoma of liver and intrahepatic bile ducts	VII(b) Hepatic carcinomas	Positive exfoliative cytology, no positive histology	IIINOS	T3	NX	M0	Blank(s)	Blank(s)	Blank(s)	Blank(s)	Blank(s)	Regional	0	None	None; diagnosed at autopsy	10	0	Blank(s)	Blank(s)	Blank(s)	Blank(s)	Blank(s)	Blank(s)	Blank(s)	Blank(s)	Blank(s)	Blank(s)	Blank(s)	Blank(s)	Blank(s)	988	0	98	Blank(s)	Liver	Dead (attributable to this cancer dx)	Alive or dead due to cancer	1
Blank(s)	Married (including common law)	57	1946	2004	July	Male	Other (American Indian/AK Native, Asian/Pacific Islander)	C22.0-Liver	8170/3: Hepatocellular carcinoma, NOS	Unknown	8.6.3 Carcinoma of liver and intrahepatic bile ducts	VII(b) Hepatic carcinomas	Positive histology	I	T1	N0	M0	Blank(s)	Blank(s)	Blank(s)	Blank(s)	Blank(s)	Localized	0	None	None; diagnosed at autopsy	999	0	Blank(s)	Blank(s)	Blank(s)	Blank(s)	Blank(s)	Blank(s)	Blank(s)	Blank(s)	Blank(s)	Blank(s)	Blank(s)	Blank(s)	Blank(s)	988	0	98	Blank(s)	Liver	Dead (attributable to this cancer dx)	Alive or dead due to cancer	52
Insured	Widowed	80	1930	2011	May	Female	Other (American Indian/AK Native, Asian/Pacific Islander)	C22.0-Liver	8170/3: Hepatocellular carcinoma, NOS	Unknown	8.6.3 Carcinoma of liver and intrahepatic bile ducts	VII(b) Hepatic carcinomas	Radiography without microscopic confirm	IV	T1	N0	M1	Blank(s)	Blank(s)	Blank(s)	Blank(s)	Blank(s)	Distant	0	None	None; diagnosed at autopsy	10	999	Blank(s)	Blank(s)	Blank(s)	Blank(s)	Blank(s)	Blank(s)	Blank(s)	Blank(s)	Blank(s)	Blank(s)	Blank(s)	Blank(s)	Blank(s)	988	0	98	Blank(s)	Liver	N/A not first tumor	N/A not first tumor	1
Blank(s)	Married (including common law)	60	1943	2004	February	Male	Black	C22.0-Liver	8162/3: Klatskin tumor	Poorly differentiated; Grade III	8.6.3 Carcinoma of liver and intrahepatic bile ducts	VII(b) Hepatic carcinomas	Positive histology	II	T2	N0	M0	Blank(s)	Blank(s)	Blank(s)	Blank(s)	Blank(s)	Localized	0	None	None; diagnosed at autopsy	998	999	Blank(s)	Blank(s)	Blank(s)	Blank(s)	Blank(s)	Blank(s)	Blank(s)	Blank(s)	Blank(s)	Blank(s)	Blank(s)	Blank(s)	Blank(s)	988	0	98	Blank(s)	Intrahepatic Bile Duct	Dead (attributable to this cancer dx)	Alive or dead due to cancer	38
Blank(s)	Single (never married)	69	1934	2004	January	Male	White	C22.0-Liver	8170/3: Hepatocellular carcinoma, NOS	Unknown	8.6.3 Carcinoma of liver and intrahepatic bile ducts	VII(b) Hepatic carcinomas	Clinical diagnosis only	UNK Stage	TX	N0	M0	Blank(s)	Blank(s)	Blank(s)	Blank(s)	Blank(s)	Localized	0	None	None; diagnosed at autopsy	10	999	Blank(s)	Blank(s)	Blank(s)	Blank(s)	Blank(s)	Blank(s)	Blank(s)	Blank(s)	Blank(s)	Blank(s)	Blank(s)	Blank(s)	Blank(s)	988	0	98	Blank(s)	Other Infectious and Parasitic Diseases including HIV	Alive or dead of other cause	Dead (attributable to causes other than this cancer dx)	9
Blank(s)	Divorced	73	1931	2004	July	Female	White	C22.0-Liver	8170/3: Hepatocellular carcinoma, NOS	Unknown	8.6.3 Carcinoma of liver and intrahepatic bile ducts	VII(b) Hepatic carcinomas	Positive histology	IV	T2	NX	M1	Blank(s)	Blank(s)	Blank(s)	Blank(s)	Blank(s)	Distant	0	None	None; diagnosed at autopsy	20	999	Blank(s)	Blank(s)	Blank(s)	Blank(s)	Blank(s)	Blank(s)	Blank(s)	Blank(s)	Blank(s)	Blank(s)	Blank(s)	Blank(s)	Blank(s)	988	0	98	Blank(s)	Chronic Obstructive Pulmonary Disease and Allied Cond	Alive or dead of other cause	Dead (attributable to causes other than this cancer dx)	13
Blank(s)	Married (including common law)	81	1923	2004	Blank(s)	Male	Other (American Indian/AK Native, Asian/Pacific Islander)	C22.0-Liver	8010/3: Carcinoma, NOS	Unknown	8.6.3 Carcinoma of liver and intrahepatic bile ducts	VII(b) Hepatic carcinomas	Radiography without microscopic confirm	UNK Stage	TX	NX	MX	Blank(s)	Blank(s)	Blank(s)	Blank(s)	Blank(s)	Unknown/unstaged	0	None	None; diagnosed at autopsy	999	999	Blank(s)	Blank(s)	Blank(s)	Blank(s)	Blank(s)	Blank(s)	Blank(s)	Blank(s)	Blank(s)	Blank(s)	Blank(s)	Blank(s)	Blank(s)	988	0	98	Blank(s)	Liver	Dead (attributable to this cancer dx)	Alive or dead due to cancer	3
Blank(s)	Widowed	82	1921	2004	April	Female	White	C22.0-Liver	8170/3: Hepatocellular carcinoma, NOS	Well differentiated; Grade I	8.6.3 Carcinoma of liver and intrahepatic bile ducts	VII(b) Hepatic carcinomas	Positive histology	UNK Stage	TX	NX	MX	Blank(s)	Blank(s)	Blank(s)	Blank(s)	Blank(s)	Unknown/unstaged	0	None	None; diagnosed at autopsy	999	999	Blank(s)	Blank(s)	Blank(s)	Blank(s)	Blank(s)	Blank(s)	Blank(s)	Blank(s)	Blank(s)	Blank(s)	Blank(s)	Blank(s)	Blank(s)	988	0	98	Blank(s)	Liver	Dead (attributable to this cancer dx)	Alive or dead due to cancer	4
Blank(s)	Married (including common law)	73	1930	2004	March	Male	Other (American Indian/AK Native, Asian/Pacific Islander)	C22.0-Liver	8170/3: Hepatocellular carcinoma, NOS	Unknown	8.6.3 Carcinoma of liver and intrahepatic bile ducts	VII(b) Hepatic carcinomas	Positive histology	IV	T4	NX	M1	Blank(s)	Blank(s)	Blank(s)	Blank(s)	Blank(s)	Distant	0	None	None; diagnosed at autopsy	999	999	Blank(s)	Blank(s)	Blank(s)	Blank(s)	Blank(s)	Blank(s)	Blank(s)	Blank(s)	Blank(s)	Blank(s)	Blank(s)	Blank(s)	Blank(s)	988	0	98	Blank(s)	Liver	Dead (attributable to this cancer dx)	Alive or dead due to cancer	7
Blank(s)	Widowed	66	1937	2004	February	Female	Other (American Indian/AK Native, Asian/Pacific Islander)	C22.0-Liver	8170/3: Hepatocellular carcinoma, NOS	Unknown	8.6.3 Carcinoma of liver and intrahepatic bile ducts	VII(b) Hepatic carcinomas	Positive histology	UNK Stage	T3	NX	MX	Blank(s)	Blank(s)	Blank(s)	Blank(s)	Blank(s)	Localized	0	None	None; diagnosed at autopsy	10	999	Blank(s)	Blank(s)	Blank(s)	Blank(s)	Blank(s)	Blank(s)	Blank(s)	Blank(s)	Blank(s)	Blank(s)	Blank(s)	Blank(s)	Blank(s)	988	0	98	Blank(s)	Liver	Dead (attributable to this cancer dx)	Alive or dead due to cancer	1
Insured/No specifics	Single (never married)	90	1922	2012	November	Male	White	C22.0-Liver	8170/3: Hepatocellular carcinoma, NOS	Unknown	8.6.3 Carcinoma of liver and intrahepatic bile ducts	VII(b) Hepatic carcinomas	Radiography without microscopic confirm	IV	TX	N0	M1	Blank(s)	Blank(s)	Blank(s)	Blank(s)	Blank(s)	Distant	0	None	None; diagnosed at autopsy	10	0	Blank(s)	Blank(s)	Blank(s)	Blank(s)	Blank(s)	Blank(s)	Blank(s)	Blank(s)	Blank(s)	Blank(s)	Blank(s)	Blank(s)	Blank(s)	988	0	98	Blank(s)	Liver	N/A not first tumor	N/A not first tumor	5
Blank(s)	Separated	73	1931	2004	September	Male	White	C22.0-Liver	8170/3: Hepatocellular carcinoma, NOS	Poorly differentiated; Grade III	8.6.3 Carcinoma of liver and intrahepatic bile ducts	VII(b) Hepatic carcinomas	Positive histology	IV	T4	N0	M1	Blank(s)	Blank(s)	Blank(s)	Blank(s)	Blank(s)	Distant	0	None	None; diagnosed at autopsy	999	999	Blank(s)	Blank(s)	Blank(s)	Blank(s)	Blank(s)	Blank(s)	Blank(s)	Blank(s)	Blank(s)	Blank(s)	Blank(s)	Blank(s)	Blank(s)	988	0	98	Blank(s)	Pancreas	Dead (attributable to this cancer dx)	Alive or dead due to cancer	0
Blank(s)	Divorced	56	1947	2004	May	Male	Other (American Indian/AK Native, Asian/Pacific Islander)	C22.0-Liver	8170/3: Hepatocellular carcinoma, NOS	Unknown	8.6.3 Carcinoma of liver and intrahepatic bile ducts	VII(b) Hepatic carcinomas	Positive exfoliative cytology, no positive histology	IIIA	T3	N0	M0	Blank(s)	Blank(s)	Blank(s)	Blank(s)	Blank(s)	Regional	0	None	None; diagnosed at autopsy	30	999	Blank(s)	Blank(s)	Blank(s)	Blank(s)	Blank(s)	Blank(s)	Blank(s)	Blank(s)	Blank(s)	Blank(s)	Blank(s)	Blank(s)	Blank(s)	988	0	98	Blank(s)	Liver	Dead (attributable to this cancer dx)	Alive or dead due to cancer	3
Blank(s)	Married (including common law)	60	1943	2004	April	Male	White	C22.1-Intrahepatic bile duct	8160/3: Cholangiocarcinoma	Unknown	8.6.3 Carcinoma of liver and intrahepatic bile ducts	VII(b) Hepatic carcinomas	Positive exfoliative cytology, no positive histology	IIIC	T4	N1	M0	Blank(s)	Blank(s)	Blank(s)	Blank(s)	Blank(s)	Distant	0	None	None; diagnosed at autopsy	999	999	Blank(s)	Blank(s)	Blank(s)	Blank(s)	Blank(s)	Blank(s)	Blank(s)	Blank(s)	Blank(s)	Blank(s)	Blank(s)	Blank(s)	Blank(s)	988	0	98	Blank(s)	Intrahepatic Bile Duct	Dead (attributable to this cancer dx)	Alive or dead due to cancer	8
Any Medicaid	Married (including common law)	60	1949	2010	January	Female	Other (American Indian/AK Native, Asian/Pacific Islander)	C22.0-Liver	8170/3: Hepatocellular carcinoma, NOS	Unknown	8.6.3 Carcinoma of liver and intrahepatic bile ducts	VII(b) Hepatic carcinomas	Radiography without microscopic confirm	I	T1	N0	M0	Blank(s)	Blank(s)	Blank(s)	Blank(s)	Blank(s)	Localized	0	None	None; diagnosed at autopsy	20	999	Blank(s)	Blank(s)	Blank(s)	Blank(s)	Blank(s)	Blank(s)	Blank(s)	Blank(s)	Blank(s)	Blank(s)	Blank(s)	Blank(s)	Blank(s)	988	0	98	Blank(s)	Breast	N/A not first tumor	N/A not first tumor	39
Insured	Single (never married)	80	1933	2013	October	Male	White	C22.0-Liver	8170/3: Hepatocellular carcinoma, NOS	Unknown	8.6.3 Carcinoma of liver and intrahepatic bile ducts	VII(b) Hepatic carcinomas	Positive exfoliative cytology, no positive histology	UNK Stage	T1	NX	MX	Blank(s)	Blank(s)	Blank(s)	Blank(s)	Blank(s)	Localized	0	None	None; diagnosed at autopsy	20	999	Blank(s)	Blank(s)	Blank(s)	Blank(s)	Blank(s)	Blank(s)	Blank(s)	Blank(s)	Blank(s)	Blank(s)	Blank(s)	Blank(s)	Blank(s)	988	0	98	Blank(s)	Alive	N/A not first tumor	N/A not first tumor	38
Blank(s)	Married (including common law)	64	1940	2004	November	Male	Other (American Indian/AK Native, Asian/Pacific Islander)	C22.0-Liver	8170/3: Hepatocellular carcinoma, NOS	Unknown	8.6.3 Carcinoma of liver and intrahepatic bile ducts	VII(b) Hepatic carcinomas	Positive exfoliative cytology, no positive histology	UNK Stage	T1	NX	MX	Blank(s)	Blank(s)	Blank(s)	Blank(s)	Blank(s)	Localized	0	None	None; diagnosed at autopsy	999	999	Blank(s)	Blank(s)	Blank(s)	Blank(s)	Blank(s)	Blank(s)	Blank(s)	Blank(s)	Blank(s)	Blank(s)	Blank(s)	Blank(s)	Blank(s)	988	0	98	Blank(s)	Liver	Dead (attributable to this cancer dx)	Alive or dead due to cancer	3
Blank(s)	Married (including common law)	60	1943	2004	March	Male	White	C22.0-Liver	8170/3: Hepatocellular carcinoma, NOS	Moderately differentiated; Grade II	8.6.3 Carcinoma of liver and intrahepatic bile ducts	VII(b) Hepatic carcinomas	Positive histology	IIIA	T3	N0	M0	Blank(s)	Blank(s)	Blank(s)	Blank(s)	Blank(s)	Regional	37	1 to 3 regional lymph nodes removed	None; diagnosed at autopsy	10	999	Blank(s)	Blank(s)	Blank(s)	Blank(s)	Blank(s)	Blank(s)	Blank(s)	Blank(s)	Blank(s)	Blank(s)	Blank(s)	Blank(s)	Blank(s)	988	1	0	Blank(s)	Other Infectious and Parasitic Diseases including HIV	Alive or dead of other cause	Dead (attributable to causes other than this cancer dx)	5
Blank(s)	Married (including common law)	56	1948	2004	November	Male	White	C22.0-Liver	8170/3: Hepatocellular carcinoma, NOS	Unknown	8.6.3 Carcinoma of liver and intrahepatic bile ducts	VII(b) Hepatic carcinomas	Radiography without microscopic confirm	II	T2	N0	M0	Blank(s)	Blank(s)	Blank(s)	Blank(s)	Blank(s)	Regional	0	None	None; diagnosed at autopsy	10	999	Blank(s)	Blank(s)	Blank(s)	Blank(s)	Blank(s)	Blank(s)	Blank(s)	Blank(s)	Blank(s)	Blank(s)	Blank(s)	Blank(s)	Blank(s)	988	0	98	Blank(s)	Non-Hodgkin Lymphoma	N/A not first tumor	N/A not first tumor	0
Blank(s)	Widowed	78	1926	2004	September	Male	White	C22.0-Liver	8170/3: Hepatocellular carcinoma, NOS	Unknown	8.6.3 Carcinoma of liver and intrahepatic bile ducts	VII(b) Hepatic carcinomas	Radiography without microscopic confirm	UNK Stage	T1	NX	MX	Blank(s)	Blank(s)	Blank(s)	Blank(s)	Blank(s)	Localized	0	None	None; diagnosed at autopsy	998	999	Blank(s)	Blank(s)	Blank(s)	Blank(s)	Blank(s)	Blank(s)	Blank(s)	Blank(s)	Blank(s)	Blank(s)	Blank(s)	Blank(s)	Blank(s)	988	0	98	Blank(s)	Other Cause of Death	Alive or dead of other cause	Dead (attributable to causes other than this cancer dx)	0
Blank(s)	Divorced	70	1933	2004	August	Female	White	C22.0-Liver	8170/3: Hepatocellular carcinoma, NOS	Unknown	8.6.3 Carcinoma of liver and intrahepatic bile ducts	VII(b) Hepatic carcinomas	Positive histology	II	T2	N0	M0	Blank(s)	Blank(s)	Blank(s)	Blank(s)	Blank(s)	Localized	0	None	None; diagnosed at autopsy	10	999	Blank(s)	Blank(s)	Blank(s)	Blank(s)	Blank(s)	Blank(s)	Blank(s)	Blank(s)	Blank(s)	Blank(s)	Blank(s)	Blank(s)	Blank(s)	988	0	98	Blank(s)	Liver	Dead (attributable to this cancer dx)	Alive or dead due to cancer	15
Blank(s)	Widowed	77	1926	2004	June	Female	White	C22.0-Liver	8246/3: Neuroendocrine carcinoma, NOS	Well differentiated; Grade I	8.6.3 Carcinoma of liver and intrahepatic bile ducts	VII(b) Hepatic carcinomas	Positive histology	IIIB	T4	N0	M0	Blank(s)	Blank(s)	Blank(s)	Blank(s)	Blank(s)	Distant	0	None	None; diagnosed at autopsy	999	999	Blank(s)	Blank(s)	Blank(s)	Blank(s)	Blank(s)	Blank(s)	Blank(s)	Blank(s)	Blank(s)	Blank(s)	Blank(s)	Blank(s)	Blank(s)	988	0	98	Blank(s)	Pancreas	Dead (attributable to this cancer dx)	Alive or dead due to cancer	0
Blank(s)	Married (including common law)	72	1931	2004	March	Male	Other (American Indian/AK Native, Asian/Pacific Islander)	C22.0-Liver	8170/3: Hepatocellular carcinoma, NOS	Unknown	8.6.3 Carcinoma of liver and intrahepatic bile ducts	VII(b) Hepatic carcinomas	Radiography without microscopic confirm	UNK Stage	T3	NX	MX	Blank(s)	Blank(s)	Blank(s)	Blank(s)	Blank(s)	Regional	0	None	None; diagnosed at autopsy	998	999	Blank(s)	Blank(s)	Blank(s)	Blank(s)	Blank(s)	Blank(s)	Blank(s)	Blank(s)	Blank(s)	Blank(s)	Blank(s)	Blank(s)	Blank(s)	988	0	98	Blank(s)	Liver	Dead (attributable to this cancer dx)	Alive or dead due to cancer	1
Blank(s)	Single (never married)	51	1953	2004	September	Male	White	C22.0-Liver	8170/3: Hepatocellular carcinoma, NOS	Unknown	8.6.3 Carcinoma of liver and intrahepatic bile ducts	VII(b) Hepatic carcinomas	Positive exfoliative cytology, no positive histology	IV	T3	N1	M1	Blank(s)	Blank(s)	Blank(s)	Blank(s)	Blank(s)	Distant	0	None	None; diagnosed at autopsy	10	999	Blank(s)	Blank(s)	Blank(s)	Blank(s)	Blank(s)	Blank(s)	Blank(s)	Blank(s)	Blank(s)	Blank(s)	Blank(s)	Blank(s)	Blank(s)	988	0	98	Blank(s)	Liver	Dead (attributable to this cancer dx)	Alive or dead due to cancer	2
Blank(s)	Single (never married)	54	1949	2004	April	Female	Other (American Indian/AK Native, Asian/Pacific Islander)	C22.0-Liver	8170/3: Hepatocellular carcinoma, NOS	Well differentiated; Grade I	8.6.3 Carcinoma of liver and intrahepatic bile ducts	VII(b) Hepatic carcinomas	Positive histology	II	T2	N0	M0	Blank(s)	Blank(s)	Blank(s)	Blank(s)	Blank(s)	Regional	61	None	None; diagnosed at autopsy	10	999	Blank(s)	Blank(s)	Blank(s)	Blank(s)	Blank(s)	Blank(s)	Blank(s)	Blank(s)	Blank(s)	Blank(s)	Blank(s)	Blank(s)	Blank(s)	988	0	98	Blank(s)	Alive	Alive or dead of other cause	Alive or dead due to cancer	152
Blank(s)	Married (including common law)	68	1936	2004	May	Female	White	C22.1-Intrahepatic bile duct	8160/3: Cholangiocarcinoma	Unknown	8.6.3 Carcinoma of liver and intrahepatic bile ducts	VII(b) Hepatic carcinomas	Positive histology	UNK Stage	TX	NX	MX	Blank(s)	Blank(s)	Blank(s)	Blank(s)	Blank(s)	Regional	0	None	None; diagnosed at autopsy	20	999	Blank(s)	Blank(s)	Blank(s)	Blank(s)	Blank(s)	Blank(s)	Blank(s)	Blank(s)	Blank(s)	Blank(s)	Blank(s)	Blank(s)	Blank(s)	988	0	98	Blank(s)	Intrahepatic Bile Duct	Dead (attributable to this cancer dx)	Alive or dead due to cancer	2
Blank(s)	Married (including common law)	57	1947	2004	June	Male	Other (American Indian/AK Native, Asian/Pacific Islander)	C22.0-Liver	8170/3: Hepatocellular carcinoma, NOS	Unknown	8.6.3 Carcinoma of liver and intrahepatic bile ducts	VII(b) Hepatic carcinomas	Positive histology	IIIA	T3	N0	M0	Blank(s)	Blank(s)	Blank(s)	Blank(s)	Blank(s)	Regional	0	None	None; diagnosed at autopsy	20	999	Blank(s)	Blank(s)	Blank(s)	Blank(s)	Blank(s)	Blank(s)	Blank(s)	Blank(s)	Blank(s)	Blank(s)	Blank(s)	Blank(s)	Blank(s)	988	0	98	Blank(s)	Liver	Dead (attributable to this cancer dx)	Alive or dead due to cancer	3
Blank(s)	Widowed	78	1925	2004	August	Female	Other (American Indian/AK Native, Asian/Pacific Islander)	C22.0-Liver	8170/3: Hepatocellular carcinoma, NOS	Unknown	8.6.3 Carcinoma of liver and intrahepatic bile ducts	VII(b) Hepatic carcinomas	Positive histology	UNK Stage	TX	NX	M0	Blank(s)	Blank(s)	Blank(s)	Blank(s)	Blank(s)	Regional	0	None	None; diagnosed at autopsy	10	999	Blank(s)	Blank(s)	Blank(s)	Blank(s)	Blank(s)	Blank(s)	Blank(s)	Blank(s)	Blank(s)	Blank(s)	Blank(s)	Blank(s)	Blank(s)	988	0	98	Blank(s)	Liver	Dead (attributable to this cancer dx)	Alive or dead due to cancer	4
Blank(s)	Married (including common law)	57	1947	2004	May	Male	White	C22.0-Liver	8170/3: Hepatocellular carcinoma, NOS	Unknown	8.6.3 Carcinoma of liver and intrahepatic bile ducts	VII(b) Hepatic carcinomas	Positive exfoliative cytology, no positive histology	IIIA	T3	N0	M0	Blank(s)	Blank(s)	Blank(s)	Blank(s)	Blank(s)	Regional	0	None	None; diagnosed at autopsy	20	999	Blank(s)	Blank(s)	Blank(s)	Blank(s)	Blank(s)	Blank(s)	Blank(s)	Blank(s)	Blank(s)	Blank(s)	Blank(s)	Blank(s)	Blank(s)	988	0	98	Blank(s)	Liver	Dead (attributable to this cancer dx)	Alive or dead due to cancer	2
Blank(s)	Married (including common law)	70	1933	2004	June	Male	Other (American Indian/AK Native, Asian/Pacific Islander)	C22.0-Liver	8170/3: Hepatocellular carcinoma, NOS	Moderately differentiated; Grade II	8.6.3 Carcinoma of liver and intrahepatic bile ducts	VII(b) Hepatic carcinomas	Positive histology	II	T2	N0	M0	Blank(s)	Blank(s)	Blank(s)	Blank(s)	Blank(s)	Localized	61	None	None; diagnosed at autopsy	20	999	Blank(s)	Blank(s)	Blank(s)	Blank(s)	Blank(s)	Blank(s)	Blank(s)	Blank(s)	Blank(s)	Blank(s)	Blank(s)	Blank(s)	Blank(s)	988	0	98	Blank(s)	Other Cause of Death	Dead (attributable to this cancer dx)	Alive or dead due to cancer	142
Blank(s)	Married (including common law)	78	1925	2004	March	Male	Other (American Indian/AK Native, Asian/Pacific Islander)	C22.0-Liver	8170/3: Hepatocellular carcinoma, NOS	Well differentiated; Grade I	8.6.3 Carcinoma of liver and intrahepatic bile ducts	VII(b) Hepatic carcinomas	Positive exfoliative cytology, no positive histology	UNK Stage	T1	NX	MX	Blank(s)	Blank(s)	Blank(s)	Blank(s)	Blank(s)	Localized	0	None	None; diagnosed at autopsy	20	999	Blank(s)	Blank(s)	Blank(s)	Blank(s)	Blank(s)	Blank(s)	Blank(s)	Blank(s)	Blank(s)	Blank(s)	Blank(s)	Blank(s)	Blank(s)	988	0	98	Blank(s)	State DC not available or state DC available but no COD	Dead (missing/unknown COD)	Dead (missing/unknown COD)	53
Blank(s)	Married (including common law)	68	1935	2004	July	Female	Black	C22.0-Liver	8255/3: Adenocarcinoma with mixed subtypes	Unknown	8.6.3 Carcinoma of liver and intrahepatic bile ducts	Not classified by ICCC or in situ	Positive histology	I	T1	N0	M0	Blank(s)	Blank(s)	Blank(s)	Blank(s)	Blank(s)	Localized	61	1 to 3 regional lymph nodes removed	None; diagnosed at autopsy	20	1	Blank(s)	Blank(s)	Blank(s)	Blank(s)	Blank(s)	Blank(s)	Blank(s)	Blank(s)	Blank(s)	Blank(s)	Blank(s)	Blank(s)	Blank(s)	988	2	0	Blank(s)	Diabetes Mellitus	Alive or dead of other cause	Dead (attributable to causes other than this cancer dx)	122
Blank(s)	Single (never married)	48	1956	2004	May	Male	Other (American Indian/AK Native, Asian/Pacific Islander)	C22.0-Liver	8170/3: Hepatocellular carcinoma, NOS	Moderately differentiated; Grade II	8.6.3 Carcinoma of liver and intrahepatic bile ducts	VII(b) Hepatic carcinomas	Positive histology	I	T1	N0	M0	Blank(s)	Blank(s)	Blank(s)	Blank(s)	Blank(s)	Localized	16	None	None; diagnosed at autopsy	998	999	Blank(s)	Blank(s)	Blank(s)	Blank(s)	Blank(s)	Blank(s)	Blank(s)	Blank(s)	Blank(s)	Blank(s)	Blank(s)	Blank(s)	Blank(s)	988	0	98	Blank(s)	Liver	Dead (attributable to this cancer dx)	Alive or dead due to cancer	16
Blank(s)	Married (including common law)	73	1930	2004	March	Male	Other (American Indian/AK Native, Asian/Pacific Islander)	C22.0-Liver	8170/3: Hepatocellular carcinoma, NOS	Poorly differentiated; Grade III	8.6.3 Carcinoma of liver and intrahepatic bile ducts	VII(b) Hepatic carcinomas	Positive histology	IIIC	T1	N1	M0	Blank(s)	Blank(s)	Blank(s)	Blank(s)	Blank(s)	Regional	0	None	None; diagnosed at autopsy	10	999	Blank(s)	Blank(s)	Blank(s)	Blank(s)	Blank(s)	Blank(s)	Blank(s)	Blank(s)	Blank(s)	Blank(s)	Blank(s)	Blank(s)	Blank(s)	988	0	98	Blank(s)	Liver	Dead (attributable to this cancer dx)	Alive or dead due to cancer	6
Blank(s)	Married (including common law)	62	1941	2004	January	Male	Other (American Indian/AK Native, Asian/Pacific Islander)	C22.0-Liver	8170/3: Hepatocellular carcinoma, NOS	Well differentiated; Grade I	8.6.3 Carcinoma of liver and intrahepatic bile ducts	VII(b) Hepatic carcinomas	Positive histology	I	T1	N0	M0	Blank(s)	Blank(s)	Blank(s)	Blank(s)	Blank(s)	Localized	22	None	None; diagnosed at autopsy	999	999	Blank(s)	Blank(s)	Blank(s)	Blank(s)	Blank(s)	Blank(s)	Blank(s)	Blank(s)	Blank(s)	Blank(s)	Blank(s)	Blank(s)	Blank(s)	988	0	98	Blank(s)	Alive	Alive or dead of other cause	Alive or dead due to cancer	155
Blank(s)	Married (including common law)	47	1956	2004	April	Female	Other (American Indian/AK Native, Asian/Pacific Islander)	C22.0-Liver	8170/3: Hepatocellular carcinoma, NOS	Unknown	8.6.3 Carcinoma of liver and intrahepatic bile ducts	VII(b) Hepatic carcinomas	Radiography without microscopic confirm	II	T2	N0	M0	Blank(s)	Blank(s)	Blank(s)	Blank(s)	Blank(s)	Localized	0	None	None; diagnosed at autopsy	10	999	Blank(s)	Blank(s)	Blank(s)	Blank(s)	Blank(s)	Blank(s)	Blank(s)	Blank(s)	Blank(s)	Blank(s)	Blank(s)	Blank(s)	Blank(s)	988	0	98	Blank(s)	Alive	Alive or dead of other cause	Alive or dead due to cancer	152
Blank(s)	Single (never married)	47	1956	2004	February	Male	White	C22.0-Liver	8170/3: Hepatocellular carcinoma, NOS	Unknown	8.6.3 Carcinoma of liver and intrahepatic bile ducts	VII(b) Hepatic carcinomas	Positive exfoliative cytology, no positive histology	IIIA	T3	N0	M0	Blank(s)	Blank(s)	Blank(s)	Blank(s)	Blank(s)	Regional	0	None	None; diagnosed at autopsy	20	999	Blank(s)	Blank(s)	Blank(s)	Blank(s)	Blank(s)	Blank(s)	Blank(s)	Blank(s)	Blank(s)	Blank(s)	Blank(s)	Blank(s)	Blank(s)	988	0	98	Blank(s)	Liver	Dead (attributable to this cancer dx)	Alive or dead due to cancer	1
Blank(s)	Married (including common law)	90	1914	2004	July	Female	White	C22.0-Liver	8174/3: Hepatocellular carcinoma, clear cell type	Poorly differentiated; Grade III	8.6.3 Carcinoma of liver and intrahepatic bile ducts	VII(b) Hepatic carcinomas	Positive histology	UNK Stage	T1	NX	M0	Blank(s)	Blank(s)	Blank(s)	Blank(s)	Blank(s)	Localized	0	None	None; diagnosed at autopsy	999	999	Blank(s)	Blank(s)	Blank(s)	Blank(s)	Blank(s)	Blank(s)	Blank(s)	Blank(s)	Blank(s)	Blank(s)	Blank(s)	Blank(s)	Blank(s)	988	0	98	Blank(s)	Liver	Dead (attributable to this cancer dx)	Alive or dead due to cancer	0
Blank(s)	Unknown	58	1945	2004	September	Male	Black	C22.0-Liver	8170/3: Hepatocellular carcinoma, NOS	Unknown	8.6.3 Carcinoma of liver and intrahepatic bile ducts	VII(b) Hepatic carcinomas	Positive laboratory test/marker study	UNK Stage	TX	NX	MX	Blank(s)	Blank(s)	Blank(s)	Blank(s)	Blank(s)	Unknown/unstaged	0	None	None; diagnosed at autopsy	10	999	Blank(s)	Blank(s)	Blank(s)	Blank(s)	Blank(s)	Blank(s)	Blank(s)	Blank(s)	Blank(s)	Blank(s)	Blank(s)	Blank(s)	Blank(s)	988	0	98	Blank(s)	Other Infectious and Parasitic Diseases including HIV	Alive or dead of other cause	Dead (attributable to causes other than this cancer dx)	0
Blank(s)	Single (never married)	86	1917	2004	January	Male	Other (American Indian/AK Native, Asian/Pacific Islander)	C22.0-Liver	8170/3: Hepatocellular carcinoma, NOS	Unknown	8.6.3 Carcinoma of liver and intrahepatic bile ducts	VII(b) Hepatic carcinomas	Radiography without microscopic confirm	IIIA	T3	N0	M0	Blank(s)	Blank(s)	Blank(s)	Blank(s)	Blank(s)	Regional	0	None	None; diagnosed at autopsy	10	1	Blank(s)	Blank(s)	Blank(s)	Blank(s)	Blank(s)	Blank(s)	Blank(s)	Blank(s)	Blank(s)	Blank(s)	Blank(s)	Blank(s)	Blank(s)	988	0	98	Blank(s)	Liver	Dead (attributable to this cancer dx)	Alive or dead due to cancer	16
Blank(s)	Married (including common law)	55	1948	2004	April	Male	Other (American Indian/AK Native, Asian/Pacific Islander)	C22.0-Liver	8170/3: Hepatocellular carcinoma, NOS	Moderately differentiated; Grade II	8.6.3 Carcinoma of liver and intrahepatic bile ducts	VII(b) Hepatic carcinomas	Positive histology	I	T1	N0	M0	Blank(s)	Blank(s)	Blank(s)	Blank(s)	Blank(s)	Localized	36	None	None; diagnosed at autopsy	10	999	Blank(s)	Blank(s)	Blank(s)	Blank(s)	Blank(s)	Blank(s)	Blank(s)	Blank(s)	Blank(s)	Blank(s)	Blank(s)	Blank(s)	Blank(s)	988	0	98	Blank(s)	Alive	Alive or dead of other cause	Alive or dead due to cancer	152
Blank(s)	Divorced	67	1937	2004	May	Male	White	C22.0-Liver	8170/3: Hepatocellular carcinoma, NOS	Undifferentiated; anaplastic; Grade IV	8.6.3 Carcinoma of liver and intrahepatic bile ducts	VII(b) Hepatic carcinomas	Positive histology	UNK Stage	T1	NX	M0	Blank(s)	Blank(s)	Blank(s)	Blank(s)	Blank(s)	Localized	0	None	None; diagnosed at autopsy	20	999	Blank(s)	Blank(s)	Blank(s)	Blank(s)	Blank(s)	Blank(s)	Blank(s)	Blank(s)	Blank(s)	Blank(s)	Blank(s)	Blank(s)	Blank(s)	988	0	98	Blank(s)	Miscellaneous Malignant Cancer	Dead (attributable to this cancer dx)	Alive or dead due to cancer	4
Blank(s)	Unknown	54	1949	2004	March	Male	White	C22.0-Liver	8170/3: Hepatocellular carcinoma, NOS	Well differentiated; Grade I	8.6.3 Carcinoma of liver and intrahepatic bile ducts	VII(b) Hepatic carcinomas	Positive histology	IIIA	T3	N0	M0	Blank(s)	Blank(s)	Blank(s)	Blank(s)	Blank(s)	Regional	0	None	None; diagnosed at autopsy	20	999	Blank(s)	Blank(s)	Blank(s)	Blank(s)	Blank(s)	Blank(s)	Blank(s)	Blank(s)	Blank(s)	Blank(s)	Blank(s)	Blank(s)	Blank(s)	988	98	0	Blank(s)	Other Infectious and Parasitic Diseases including HIV	Alive or dead of other cause	Dead (attributable to causes other than this cancer dx)	0
Blank(s)	Married (including common law)	48	1955	2004	January	Male	Black	C22.0-Liver	8170/3: Hepatocellular carcinoma, NOS	Unknown	8.6.3 Carcinoma of liver and intrahepatic bile ducts	VII(b) Hepatic carcinomas	Positive laboratory test/marker study	I	T1	N0	M0	Blank(s)	Blank(s)	Blank(s)	Blank(s)	Blank(s)	Localized	0	None	None; diagnosed at autopsy	10	0	Blank(s)	Blank(s)	Blank(s)	Blank(s)	Blank(s)	Blank(s)	Blank(s)	Blank(s)	Blank(s)	Blank(s)	Blank(s)	Blank(s)	Blank(s)	988	0	98	Blank(s)	Liver	Dead (attributable to this cancer dx)	Alive or dead due to cancer	154
Blank(s)	Single (never married)	51	1952	2004	June	Male	White	C22.0-Liver	8170/3: Hepatocellular carcinoma, NOS	Unknown	8.6.3 Carcinoma of liver and intrahepatic bile ducts	VII(b) Hepatic carcinomas	Positive histology	IIIA	T3	N0	M0	Blank(s)	Blank(s)	Blank(s)	Blank(s)	Blank(s)	Regional	0	None	None; diagnosed at autopsy	10	999	Blank(s)	Blank(s)	Blank(s)	Blank(s)	Blank(s)	Blank(s)	Blank(s)	Blank(s)	Blank(s)	Blank(s)	Blank(s)	Blank(s)	Blank(s)	988	0	98	Blank(s)	Liver	Dead (attributable to this cancer dx)	Alive or dead due to cancer	0
Blank(s)	Married (including common law)	69	1934	2004	June	Male	Black	C22.0-Liver	8170/3: Hepatocellular carcinoma, NOS	Well differentiated; Grade I	8.6.3 Carcinoma of liver and intrahepatic bile ducts	VII(b) Hepatic carcinomas	Positive histology	II	T2	N0	M0	Blank(s)	Blank(s)	Blank(s)	Blank(s)	Blank(s)	Regional	16	None	None; diagnosed at autopsy	20	999	Blank(s)	Blank(s)	Blank(s)	Blank(s)	Blank(s)	Blank(s)	Blank(s)	Blank(s)	Blank(s)	Blank(s)	Blank(s)	Blank(s)	Blank(s)	988	0	98	Blank(s)	Liver	Dead (attributable to this cancer dx)	Alive or dead due to cancer	31
Blank(s)	Married (including common law)	56	1948	2004	February	Male	White	C22.0-Liver	8170/3: Hepatocellular carcinoma, NOS	Unknown	8.6.3 Carcinoma of liver and intrahepatic bile ducts	VII(b) Hepatic carcinomas	Unknown	UNK Stage	TX	NX	MX	Blank(s)	Blank(s)	Blank(s)	Blank(s)	Blank(s)	Unknown/unstaged	0	Unknown or not applicable	None; diagnosed at autopsy	998	999	Blank(s)	Blank(s)	Blank(s)	Blank(s)	Blank(s)	Blank(s)	Blank(s)	Blank(s)	Blank(s)	Blank(s)	Blank(s)	Blank(s)	Blank(s)	988	99	99	Blank(s)	Liver	Dead (attributable to this cancer dx)	Alive or dead due to cancer	8
Blank(s)	Widowed	64	1939	2004	February	Male	White	C22.0-Liver	8170/3: Hepatocellular carcinoma, NOS	Well differentiated; Grade I	8.6.3 Carcinoma of liver and intrahepatic bile ducts	VII(b) Hepatic carcinomas	Positive histology	I	T1	N0	M0	Blank(s)	Blank(s)	Blank(s)	Blank(s)	Blank(s)	Localized	0	None	None; diagnosed at autopsy	998	999	Blank(s)	Blank(s)	Blank(s)	Blank(s)	Blank(s)	Blank(s)	Blank(s)	Blank(s)	Blank(s)	Blank(s)	Blank(s)	Blank(s)	Blank(s)	988	0	98	Blank(s)	Diseases of Heart	Alive or dead of other cause	Dead (attributable to causes other than this cancer dx)	1
Blank(s)	Married (including common law)	72	1932	2004	December	Male	Other (American Indian/AK Native, Asian/Pacific Islander)	C22.0-Liver	8000/3: Neoplasm, malignant	Unknown	10 Unspecified Malignant Neoplasms	VII(c) Unspecified malignant hepatic tumors	Unknown	UNK Stage	TX	NX	MX	Blank(s)	Blank(s)	Blank(s)	Blank(s)	Blank(s)	Unknown/unstaged	99	Unknown or not applicable	Unknown; death certificate only	999	999	Blank(s)	Blank(s)	Blank(s)	Blank(s)	Blank(s)	Blank(s)	Blank(s)	Blank(s)	Blank(s)	Blank(s)	Blank(s)	Blank(s)	Blank(s)	988	99	99	Blank(s)	Liver	N/A not first tumor	N/A not first tumor	Unknown
Blank(s)	Married (including common law)	50	1953	2004	August	Male	White	C22.0-Liver	8170/3: Hepatocellular carcinoma, NOS	Unknown	8.6.3 Carcinoma of liver and intrahepatic bile ducts	VII(b) Hepatic carcinomas	Radiography without microscopic confirm	IV	T3	N0	M1	Blank(s)	Blank(s)	Blank(s)	Blank(s)	Blank(s)	Distant	0	None	None; diagnosed at autopsy	999	999	Blank(s)	Blank(s)	Blank(s)	Blank(s)	Blank(s)	Blank(s)	Blank(s)	Blank(s)	Blank(s)	Blank(s)	Blank(s)	Blank(s)	Blank(s)	988	0	98	Blank(s)	Other Infectious and Parasitic Diseases including HIV	Alive or dead of other cause	Dead (attributable to causes other than this cancer dx)	2
Blank(s)	Married (including common law)	46	1957	2004	August	Male	Other (American Indian/AK Native, Asian/Pacific Islander)	C22.0-Liver	8170/3: Hepatocellular carcinoma, NOS	Moderately differentiated; Grade II	8.6.3 Carcinoma of liver and intrahepatic bile ducts	VII(b) Hepatic carcinomas	Positive histology	II	T2	N0	M0	Blank(s)	Blank(s)	Blank(s)	Blank(s)	Blank(s)	Localized	23	None	None; diagnosed at autopsy	998	999	Blank(s)	Blank(s)	Blank(s)	Blank(s)	Blank(s)	Blank(s)	Blank(s)	Blank(s)	Blank(s)	Blank(s)	Blank(s)	Blank(s)	Blank(s)	988	0	98	Blank(s)	Alive	Alive or dead of other cause	Alive or dead due to cancer	148
Blank(s)	Single (never married)	64	1939	2004	January	Male	White	C22.0-Liver	8170/3: Hepatocellular carcinoma, NOS	Unknown	8.6.3 Carcinoma of liver and intrahepatic bile ducts	VII(b) Hepatic carcinomas	Positive histology	UNK Stage	TX	NX	MX	Blank(s)	Blank(s)	Blank(s)	Blank(s)	Blank(s)	Regional	0	None	None; diagnosed at autopsy	998	999	Blank(s)	Blank(s)	Blank(s)	Blank(s)	Blank(s)	Blank(s)	Blank(s)	Blank(s)	Blank(s)	Blank(s)	Blank(s)	Blank(s)	Blank(s)	988	0	98	Blank(s)	Liver	Dead (attributable to this cancer dx)	Alive or dead due to cancer	0
Insured	Single (never married)	66	1946	2012	March	Male	Black	C22.0-Liver	8170/3: Hepatocellular carcinoma, NOS	Unknown	8.6.3 Carcinoma of liver and intrahepatic bile ducts	VII(b) Hepatic carcinomas	Radiography without microscopic confirm	I	T1	N0	M0	Blank(s)	Blank(s)	Blank(s)	Blank(s)	Blank(s)	Localized	17	None	None; diagnosed at autopsy	20	999	Blank(s)	Blank(s)	Blank(s)	Blank(s)	Blank(s)	Blank(s)	Blank(s)	Blank(s)	Blank(s)	Blank(s)	Blank(s)	Blank(s)	Blank(s)	988	0	98	Blank(s)	Liver	N/A not first tumor	N/A not first tumor	14
Blank(s)	Separated	76	1927	2004	May	Male	White	C22.0-Liver	8170/3: Hepatocellular carcinoma, NOS	Unknown	8.6.3 Carcinoma of liver and intrahepatic bile ducts	VII(b) Hepatic carcinomas	Clinical diagnosis only	II	T2	N0	M0	Blank(s)	Blank(s)	Blank(s)	Blank(s)	Blank(s)	Localized	0	None	None; diagnosed at autopsy	10	999	Blank(s)	Blank(s)	Blank(s)	Blank(s)	Blank(s)	Blank(s)	Blank(s)	Blank(s)	Blank(s)	Blank(s)	Blank(s)	Blank(s)	Blank(s)	988	0	98	Blank(s)	State DC not available or state DC available but no COD	N/A not first tumor	N/A not first tumor	9
Blank(s)	Widowed	74	1932	2006	Blank(s)	Male	White	C22.0-Liver	8170/3: Hepatocellular carcinoma, NOS	Unknown	8.6.3 Carcinoma of liver and intrahepatic bile ducts	VII(b) Hepatic carcinomas	Radiography without microscopic confirm	UNK Stage	TX	NX	MX	Blank(s)	Blank(s)	Blank(s)	Blank(s)	Blank(s)	Unknown/unstaged	0	None	None; diagnosed at autopsy	10	999	Blank(s)	Blank(s)	Blank(s)	Blank(s)	Blank(s)	Blank(s)	Blank(s)	Blank(s)	Blank(s)	Blank(s)	Blank(s)	Blank(s)	Blank(s)	988	0	98	Blank(s)	Miscellaneous Malignant Cancer	N/A not first tumor	N/A not first tumor	4
Blank(s)	Widowed	71	1933	2004	May	Female	Other (American Indian/AK Native, Asian/Pacific Islander)	C22.0-Liver	8170/3: Hepatocellular carcinoma, NOS	Unknown	8.6.3 Carcinoma of liver and intrahepatic bile ducts	VII(b) Hepatic carcinomas	Radiography without microscopic confirm	I	T1	N0	M0	Blank(s)	Blank(s)	Blank(s)	Blank(s)	Blank(s)	Regional	0	None	None; diagnosed at autopsy	10	999	Blank(s)	Blank(s)	Blank(s)	Blank(s)	Blank(s)	Blank(s)	Blank(s)	Blank(s)	Blank(s)	Blank(s)	Blank(s)	Blank(s)	Blank(s)	988	0	98	Blank(s)	Liver	Dead (attributable to this cancer dx)	Alive or dead due to cancer	47
Blank(s)	Single (never married)	50	1953	2004	August	Male	White	C22.0-Liver	8170/3: Hepatocellular carcinoma, NOS	Unknown	8.6.3 Carcinoma of liver and intrahepatic bile ducts	VII(b) Hepatic carcinomas	Radiography without microscopic confirm	UNK Stage	T1	N1	MX	Blank(s)	Blank(s)	Blank(s)	Blank(s)	Blank(s)	Regional	0	None	None; diagnosed at autopsy	10	999	Blank(s)	Blank(s)	Blank(s)	Blank(s)	Blank(s)	Blank(s)	Blank(s)	Blank(s)	Blank(s)	Blank(s)	Blank(s)	Blank(s)	Blank(s)	988	0	98	Blank(s)	Chronic Liver Disease and Cirrhosis	Dead (attributable to this cancer dx)	Alive or dead due to cancer	0
Blank(s)	Single (never married)	63	1941	2004	August	Male	White	C22.0-Liver	8170/3: Hepatocellular carcinoma, NOS	Unknown	8.6.3 Carcinoma of liver and intrahepatic bile ducts	VII(b) Hepatic carcinomas	Clinical diagnosis only	IV	T1	N0	M1	Blank(s)	Blank(s)	Blank(s)	Blank(s)	Blank(s)	Distant	0	None	None; diagnosed at autopsy	10	999	Blank(s)	Blank(s)	Blank(s)	Blank(s)	Blank(s)	Blank(s)	Blank(s)	Blank(s)	Blank(s)	Blank(s)	Blank(s)	Blank(s)	Blank(s)	988	0	98	Blank(s)	Miscellaneous Malignant Cancer	Dead (attributable to this cancer dx)	Alive or dead due to cancer	1
Blank(s)	Single (never married)	69	1935	2004	May	Male	White	C22.0-Liver	8170/3: Hepatocellular carcinoma, NOS	Unknown	8.6.3 Carcinoma of liver and intrahepatic bile ducts	VII(b) Hepatic carcinomas	Positive laboratory test/marker study	IV	T2	NX	M1	Blank(s)	Blank(s)	Blank(s)	Blank(s)	Blank(s)	Distant	0	None	None; diagnosed at autopsy	10	0	Blank(s)	Blank(s)	Blank(s)	Blank(s)	Blank(s)	Blank(s)	Blank(s)	Blank(s)	Blank(s)	Blank(s)	Blank(s)	Blank(s)	Blank(s)	988	0	98	Blank(s)	Other Infectious and Parasitic Diseases including HIV	Alive or dead of other cause	Dead (attributable to causes other than this cancer dx)	3
Blank(s)	Married (including common law)	58	1945	2004	June	Female	Other (American Indian/AK Native, Asian/Pacific Islander)	C22.0-Liver	8170/3: Hepatocellular carcinoma, NOS	Unknown	8.6.3 Carcinoma of liver and intrahepatic bile ducts	VII(b) Hepatic carcinomas	Positive laboratory test/marker study	IIINOS	T3	NX	M0	Blank(s)	Blank(s)	Blank(s)	Blank(s)	Blank(s)	Regional	0	None	None; diagnosed at autopsy	10	999	Blank(s)	Blank(s)	Blank(s)	Blank(s)	Blank(s)	Blank(s)	Blank(s)	Blank(s)	Blank(s)	Blank(s)	Blank(s)	Blank(s)	Blank(s)	988	0	98	Blank(s)	Liver	Dead (attributable to this cancer dx)	Alive or dead due to cancer	1
Blank(s)	Married (including common law)	47	1956	2004	April	Male	Other (American Indian/AK Native, Asian/Pacific Islander)	C22.0-Liver	8170/3: Hepatocellular carcinoma, NOS	Unknown	8.6.3 Carcinoma of liver and intrahepatic bile ducts	VII(b) Hepatic carcinomas	Positive laboratory test/marker study	IIIA	T3	N0	M0	Blank(s)	Blank(s)	Blank(s)	Blank(s)	Blank(s)	Regional	0	None	None; diagnosed at autopsy	10	999	Blank(s)	Blank(s)	Blank(s)	Blank(s)	Blank(s)	Blank(s)	Blank(s)	Blank(s)	Blank(s)	Blank(s)	Blank(s)	Blank(s)	Blank(s)	988	0	98	Blank(s)	Liver	Dead (attributable to this cancer dx)	Alive or dead due to cancer	3
Blank(s)	Married (including common law)	51	1952	2004	February	Male	White	C22.1-Intrahepatic bile duct	8160/3: Cholangiocarcinoma	Unknown	8.6.3 Carcinoma of liver and intrahepatic bile ducts	VII(b) Hepatic carcinomas	Positive histology	IV	T1	N1	M1	Blank(s)	Blank(s)	Blank(s)	Blank(s)	Blank(s)	Distant	60	4 or more regional lymph nodes removed	None; diagnosed at autopsy	999	999	Blank(s)	Blank(s)	Blank(s)	Blank(s)	Blank(s)	Blank(s)	Blank(s)	Blank(s)	Blank(s)	Blank(s)	Blank(s)	Blank(s)	Blank(s)	988	5	3	Blank(s)	Intrahepatic Bile Duct	Dead (attributable to this cancer dx)	Alive or dead due to cancer	11
Blank(s)	Married (including common law)	62	1942	2004	July	Male	White	C22.0-Liver	8170/3: Hepatocellular carcinoma, NOS	Moderately differentiated; Grade II	8.6.3 Carcinoma of liver and intrahepatic bile ducts	VII(b) Hepatic carcinomas	Positive histology	IIIA	T3	N0	M0	Blank(s)	Blank(s)	Blank(s)	Blank(s)	Blank(s)	Localized	0	None	None; diagnosed at autopsy	10	1	Blank(s)	Blank(s)	Blank(s)	Blank(s)	Blank(s)	Blank(s)	Blank(s)	Blank(s)	Blank(s)	Blank(s)	Blank(s)	Blank(s)	Blank(s)	988	0	98	Blank(s)	Liver	Dead (attributable to this cancer dx)	Alive or dead due to cancer	12
Insured	Married (including common law)	63	1949	2013	April	Male	Other (American Indian/AK Native, Asian/Pacific Islander)	C22.0-Liver	8170/3: Hepatocellular carcinoma, NOS	Unknown	8.6.3 Carcinoma of liver and intrahepatic bile ducts	VII(b) Hepatic carcinomas	Radiography without microscopic confirm	IV	T4	N1	M1	Blank(s)	Blank(s)	Blank(s)	Blank(s)	Blank(s)	Distant	0	None	None; diagnosed at autopsy	10	999	Blank(s)	Blank(s)	Blank(s)	Blank(s)	Blank(s)	Blank(s)	Blank(s)	Blank(s)	Blank(s)	Blank(s)	Blank(s)	Blank(s)	Blank(s)	988	0	98	Blank(s)	Liver	N/A not first tumor	N/A not first tumor	11
Blank(s)	Married (including common law)	55	1948	2004	October	Male	White	C22.0-Liver	8170/3: Hepatocellular carcinoma, NOS	Well differentiated; Grade I	8.6.3 Carcinoma of liver and intrahepatic bile ducts	VII(b) Hepatic carcinomas	Positive histology	IIIB	T4	N0	M0	Blank(s)	Blank(s)	Blank(s)	Blank(s)	Blank(s)	Distant	0	None	None; diagnosed at autopsy	10	999	Blank(s)	Blank(s)	Blank(s)	Blank(s)	Blank(s)	Blank(s)	Blank(s)	Blank(s)	Blank(s)	Blank(s)	Blank(s)	Blank(s)	Blank(s)	988	0	98	Blank(s)	Liver	Dead (attributable to this cancer dx)	Alive or dead due to cancer	0
Blank(s)	Married (including common law)	65	1938	2004	February	Male	Other (American Indian/AK Native, Asian/Pacific Islander)	C22.0-Liver	8170/3: Hepatocellular carcinoma, NOS	Unknown	8.6.3 Carcinoma of liver and intrahepatic bile ducts	VII(b) Hepatic carcinomas	Radiography without microscopic confirm	IIINOS	T3	NX	M0	Blank(s)	Blank(s)	Blank(s)	Blank(s)	Blank(s)	Regional	0	None	None; diagnosed at autopsy	20	999	Blank(s)	Blank(s)	Blank(s)	Blank(s)	Blank(s)	Blank(s)	Blank(s)	Blank(s)	Blank(s)	Blank(s)	Blank(s)	Blank(s)	Blank(s)	988	0	98	Blank(s)	Liver	Dead (attributable to this cancer dx)	Alive or dead due to cancer	14
Blank(s)	Married (including common law)	47	1956	2004	February	Male	Other (American Indian/AK Native, Asian/Pacific Islander)	C22.0-Liver	8170/3: Hepatocellular carcinoma, NOS	Unknown	8.6.3 Carcinoma of liver and intrahepatic bile ducts	VII(b) Hepatic carcinomas	Radiography without microscopic confirm	II	T2	N0	M0	Blank(s)	Blank(s)	Blank(s)	Blank(s)	Blank(s)	Regional	0	None	None; diagnosed at autopsy	10	1	Blank(s)	Blank(s)	Blank(s)	Blank(s)	Blank(s)	Blank(s)	Blank(s)	Blank(s)	Blank(s)	Blank(s)	Blank(s)	Blank(s)	Blank(s)	988	0	98	Blank(s)	Liver	Dead (attributable to this cancer dx)	Alive or dead due to cancer	15
Blank(s)	Married (including common law)	60	1943	2004	January	Male	White	C22.0-Liver	8170/3: Hepatocellular carcinoma, NOS	Well differentiated; Grade I	8.6.3 Carcinoma of liver and intrahepatic bile ducts	VII(b) Hepatic carcinomas	Positive histology	II	T2	N0	M0	Blank(s)	Blank(s)	Blank(s)	Blank(s)	Blank(s)	Localized	61	None	None; diagnosed at autopsy	999	999	Blank(s)	Blank(s)	Blank(s)	Blank(s)	Blank(s)	Blank(s)	Blank(s)	Blank(s)	Blank(s)	Blank(s)	Blank(s)	Blank(s)	Blank(s)	988	0	98	Blank(s)	Other Cause of Death	Alive or dead of other cause	Dead (attributable to causes other than this cancer dx)	108
Any Medicaid	Married (including common law)	81	1931	2012	July	Female	White	C22.0-Liver	8170/3: Hepatocellular carcinoma, NOS	Moderately differentiated; Grade II	8.6.3 Carcinoma of liver and intrahepatic bile ducts	VII(b) Hepatic carcinomas	Positive histology	IIIB	T4	N0	M0	Blank(s)	Blank(s)	Blank(s)	Blank(s)	Blank(s)	Regional	0	None	None; diagnosed at autopsy	10	1	Blank(s)	Blank(s)	Blank(s)	Blank(s)	Blank(s)	Blank(s)	Blank(s)	Blank(s)	Blank(s)	Blank(s)	Blank(s)	Blank(s)	Blank(s)	988	0	98	Blank(s)	Alive	N/A not first tumor	N/A not first tumor	12
Blank(s)	Single (never married)	100	1904	2004	February	Female	Other (American Indian/AK Native, Asian/Pacific Islander)	C22.0-Liver	8170/3: Hepatocellular carcinoma, NOS	Unknown	8.6.3 Carcinoma of liver and intrahepatic bile ducts	VII(b) Hepatic carcinomas	Radiography without microscopic confirm	UNK Stage	TX	NX	MX	Blank(s)	Blank(s)	Blank(s)	Blank(s)	Blank(s)	Regional	0	None	None; diagnosed at autopsy	10	999	Blank(s)	Blank(s)	Blank(s)	Blank(s)	Blank(s)	Blank(s)	Blank(s)	Blank(s)	Blank(s)	Blank(s)	Blank(s)	Blank(s)	Blank(s)	988	0	98	Blank(s)	Liver	Dead (attributable to this cancer dx)	Alive or dead due to cancer	1
Blank(s)	Married (including common law)	54	1950	2004	October	Male	Other (American Indian/AK Native, Asian/Pacific Islander)	C22.0-Liver	8170/3: Hepatocellular carcinoma, NOS	Moderately differentiated; Grade II	8.6.3 Carcinoma of liver and intrahepatic bile ducts	VII(b) Hepatic carcinomas	Positive histology	I	T1	N0	M0	Blank(s)	Blank(s)	Blank(s)	Blank(s)	Blank(s)	Localized	36	None	None; diagnosed at autopsy	10	999	Blank(s)	Blank(s)	Blank(s)	Blank(s)	Blank(s)	Blank(s)	Blank(s)	Blank(s)	Blank(s)	Blank(s)	Blank(s)	Blank(s)	Blank(s)	988	0	98	Blank(s)	Liver	Dead (attributable to this cancer dx)	Alive or dead due to cancer	15
Blank(s)	Married (including common law)	79	1924	2004	October	Male	Other (American Indian/AK Native, Asian/Pacific Islander)	C22.0-Liver	8170/3: Hepatocellular carcinoma, NOS	Unknown	8.6.3 Carcinoma of liver and intrahepatic bile ducts	VII(b) Hepatic carcinomas	Radiography without microscopic confirm	IIIA	T3	N0	M0	Blank(s)	Blank(s)	Blank(s)	Blank(s)	Blank(s)	Regional	0	None	None; diagnosed at autopsy	10	999	Blank(s)	Blank(s)	Blank(s)	Blank(s)	Blank(s)	Blank(s)	Blank(s)	Blank(s)	Blank(s)	Blank(s)	Blank(s)	Blank(s)	Blank(s)	988	0	98	Blank(s)	Liver	Dead (attributable to this cancer dx)	Alive or dead due to cancer	4
Blank(s)	Married (including common law)	52	1952	2004	October	Male	White	C22.0-Liver	8010/3: Carcinoma, NOS	Unknown	8.6.3 Carcinoma of liver and intrahepatic bile ducts	VII(b) Hepatic carcinomas	Positive histology	UNK Stage	TX	N0	M0	Blank(s)	Blank(s)	Blank(s)	Blank(s)	Blank(s)	Regional	61	None	None; diagnosed at autopsy	999	999	Blank(s)	Blank(s)	Blank(s)	Blank(s)	Blank(s)	Blank(s)	Blank(s)	Blank(s)	Blank(s)	Blank(s)	Blank(s)	Blank(s)	Blank(s)	988	0	98	Blank(s)	Other Cause of Death	Alive or dead of other cause	Dead (attributable to causes other than this cancer dx)	0
Blank(s)	Married (including common law)	60	1944	2004	September	Male	White	C22.0-Liver	8170/3: Hepatocellular carcinoma, NOS	Unknown	8.6.3 Carcinoma of liver and intrahepatic bile ducts	VII(b) Hepatic carcinomas	Positive exfoliative cytology, no positive histology	IIIA	T3	N0	M0	Blank(s)	Blank(s)	Blank(s)	Blank(s)	Blank(s)	Regional	0	None	None; diagnosed at autopsy	10	999	Blank(s)	Blank(s)	Blank(s)	Blank(s)	Blank(s)	Blank(s)	Blank(s)	Blank(s)	Blank(s)	Blank(s)	Blank(s)	Blank(s)	Blank(s)	988	0	98	Blank(s)	Liver	Dead (attributable to this cancer dx)	Alive or dead due to cancer	3
Blank(s)	Married (including common law)	64	1939	2004	May	Male	Black	C22.0-Liver	8170/3: Hepatocellular carcinoma, NOS	Unknown	8.6.3 Carcinoma of liver and intrahepatic bile ducts	VII(b) Hepatic carcinomas	Positive exfoliative cytology, no positive histology	IIIA	T3	N0	M0	Blank(s)	Blank(s)	Blank(s)	Blank(s)	Blank(s)	Regional	0	None	None; diagnosed at autopsy	10	999	Blank(s)	Blank(s)	Blank(s)	Blank(s)	Blank(s)	Blank(s)	Blank(s)	Blank(s)	Blank(s)	Blank(s)	Blank(s)	Blank(s)	Blank(s)	988	0	98	Blank(s)	Liver	Dead (attributable to this cancer dx)	Alive or dead due to cancer	6
Any Medicaid	Married (including common law)	57	1954	2011	May	Male	Other (American Indian/AK Native, Asian/Pacific Islander)	C22.0-Liver	8170/3: Hepatocellular carcinoma, NOS	Unknown	8.6.3 Carcinoma of liver and intrahepatic bile ducts	VII(b) Hepatic carcinomas	Radiography without microscopic confirm	I	T1	N0	M0	Blank(s)	Blank(s)	Blank(s)	Blank(s)	Blank(s)	Localized	0	None	None; diagnosed at autopsy	20	1	Blank(s)	Blank(s)	Blank(s)	Blank(s)	Blank(s)	Blank(s)	Blank(s)	Blank(s)	Blank(s)	Blank(s)	Blank(s)	Blank(s)	Blank(s)	988	0	98	Blank(s)	Other Infectious and Parasitic Diseases including HIV	N/A not first tumor	N/A not first tumor	48
Blank(s)	Married (including common law)	62	1942	2004	November	Male	Other (American Indian/AK Native, Asian/Pacific Islander)	C22.0-Liver	8170/3: Hepatocellular carcinoma, NOS	Unknown	8.6.3 Carcinoma of liver and intrahepatic bile ducts	VII(b) Hepatic carcinomas	Positive histology	II	T2	N0	M0	Blank(s)	Blank(s)	Blank(s)	Blank(s)	Blank(s)	Regional	0	None	None; diagnosed at autopsy	20	999	Blank(s)	Blank(s)	Blank(s)	Blank(s)	Blank(s)	Blank(s)	Blank(s)	Blank(s)	Blank(s)	Blank(s)	Blank(s)	Blank(s)	Blank(s)	988	0	98	Blank(s)	Alive	N/A not first tumor	N/A not first tumor	145
Blank(s)	Single (never married)	61	1943	2004	July	Male	Black	C22.0-Liver	8170/3: Hepatocellular carcinoma, NOS	Unknown	8.6.3 Carcinoma of liver and intrahepatic bile ducts	VII(b) Hepatic carcinomas	Positive histology	UNK Stage	TX	N0	M0	Blank(s)	Blank(s)	Blank(s)	Blank(s)	Blank(s)	Unknown/unstaged	0	None	None; diagnosed at autopsy	999	999	Blank(s)	Blank(s)	Blank(s)	Blank(s)	Blank(s)	Blank(s)	Blank(s)	Blank(s)	Blank(s)	Blank(s)	Blank(s)	Blank(s)	Blank(s)	988	0	98	Blank(s)	Other Infectious and Parasitic Diseases including HIV	Dead (attributable to this cancer dx)	Alive or dead due to cancer	1
Blank(s)	Married (including common law)	75	1929	2004	September	Male	White	C22.0-Liver	8170/3: Hepatocellular carcinoma, NOS	Unknown	8.6.3 Carcinoma of liver and intrahepatic bile ducts	VII(b) Hepatic carcinomas	Clinical diagnosis only	UNK Stage	TX	NX	MX	Blank(s)	Blank(s)	Blank(s)	Blank(s)	Blank(s)	Unknown/unstaged	0	Unknown or not applicable	None; diagnosed at autopsy	999	999	Blank(s)	Blank(s)	Blank(s)	Blank(s)	Blank(s)	Blank(s)	Blank(s)	Blank(s)	Blank(s)	Blank(s)	Blank(s)	Blank(s)	Blank(s)	988	99	99	Blank(s)	Liver	Dead (attributable to this cancer dx)	Alive or dead due to cancer	0
Blank(s)	Widowed	68	1935	2004	October	Female	Other (American Indian/AK Native, Asian/Pacific Islander)	C22.1-Intrahepatic bile duct	8160/3: Cholangiocarcinoma	Poorly differentiated; Grade III	8.6.3 Carcinoma of liver and intrahepatic bile ducts	VII(b) Hepatic carcinomas	Positive histology	IV	T4	N0	M1	Blank(s)	Blank(s)	Blank(s)	Blank(s)	Blank(s)	Distant	0	None	None; diagnosed at autopsy	10	999	Blank(s)	Blank(s)	Blank(s)	Blank(s)	Blank(s)	Blank(s)	Blank(s)	Blank(s)	Blank(s)	Blank(s)	Blank(s)	Blank(s)	Blank(s)	988	0	98	Blank(s)	Intrahepatic Bile Duct	Dead (attributable to this cancer dx)	Alive or dead due to cancer	0
Blank(s)	Divorced	78	1925	2004	January	Male	White	C22.0-Liver	8170/3: Hepatocellular carcinoma, NOS	Well differentiated; Grade I	8.6.3 Carcinoma of liver and intrahepatic bile ducts	VII(b) Hepatic carcinomas	Positive histology	UNK Stage	TX	N0	M0	Blank(s)	Blank(s)	Blank(s)	Blank(s)	Blank(s)	Localized	0	None	None; diagnosed at autopsy	999	0	Blank(s)	Blank(s)	Blank(s)	Blank(s)	Blank(s)	Blank(s)	Blank(s)	Blank(s)	Blank(s)	Blank(s)	Blank(s)	Blank(s)	Blank(s)	988	0	98	Blank(s)	Liver	Dead (attributable to this cancer dx)	Alive or dead due to cancer	14
Blank(s)	Married (including common law)	72	1932	2004	December	Female	White	C22.0-Liver	8170/3: Hepatocellular carcinoma, NOS	Poorly differentiated; Grade III	8.6.3 Carcinoma of liver and intrahepatic bile ducts	VII(b) Hepatic carcinomas	Positive histology	I	T1	N0	M0	Blank(s)	Blank(s)	Blank(s)	Blank(s)	Blank(s)	Localized	0	None	None; diagnosed at autopsy	10	999	Blank(s)	Blank(s)	Blank(s)	Blank(s)	Blank(s)	Blank(s)	Blank(s)	Blank(s)	Blank(s)	Blank(s)	Blank(s)	Blank(s)	Blank(s)	988	0	98	Blank(s)	Liver	Dead (attributable to this cancer dx)	Alive or dead due to cancer	2
Blank(s)	Single (never married)	58	1946	2004	August	Male	Other (American Indian/AK Native, Asian/Pacific Islander)	C22.0-Liver	8140/3: Adenocarcinoma, NOS	Unknown	8.6.3 Carcinoma of liver and intrahepatic bile ducts	VII(b) Hepatic carcinomas	Positive histology	IIIA	T3	N0	M0	Blank(s)	Blank(s)	Blank(s)	Blank(s)	Blank(s)	Localized	0	None	None; diagnosed at autopsy	10	999	Blank(s)	Blank(s)	Blank(s)	Blank(s)	Blank(s)	Blank(s)	Blank(s)	Blank(s)	Blank(s)	Blank(s)	Blank(s)	Blank(s)	Blank(s)	988	0	98	Blank(s)	Liver	Dead (attributable to this cancer dx)	Alive or dead due to cancer	5
Blank(s)	Married (including common law)	69	1934	2004	April	Male	White	C22.0-Liver	8170/3: Hepatocellular carcinoma, NOS	Poorly differentiated; Grade III	8.6.3 Carcinoma of liver and intrahepatic bile ducts	VII(b) Hepatic carcinomas	Positive exfoliative cytology, no positive histology	IV	TX	NX	M1	Blank(s)	Blank(s)	Blank(s)	Blank(s)	Blank(s)	Distant	0	None	None; diagnosed at autopsy	998	999	Blank(s)	Blank(s)	Blank(s)	Blank(s)	Blank(s)	Blank(s)	Blank(s)	Blank(s)	Blank(s)	Blank(s)	Blank(s)	Blank(s)	Blank(s)	988	0	98	Blank(s)	Miscellaneous Malignant Cancer	Dead (attributable to this cancer dx)	Alive or dead due to cancer	0
Blank(s)	Married (including common law)	58	1946	2004	October	Male	White	C22.0-Liver	8170/3: Hepatocellular carcinoma, NOS	Unknown	8.6.3 Carcinoma of liver and intrahepatic bile ducts	VII(b) Hepatic carcinomas	Positive histology	II	T2	N0	M0	Blank(s)	Blank(s)	Blank(s)	Blank(s)	Blank(s)	Localized	0	None	None; diagnosed at autopsy	998	999	Blank(s)	Blank(s)	Blank(s)	Blank(s)	Blank(s)	Blank(s)	Blank(s)	Blank(s)	Blank(s)	Blank(s)	Blank(s)	Blank(s)	Blank(s)	988	0	98	Blank(s)	In situ, benign or unknown behavior neoplasm	Dead (attributable to this cancer dx)	Alive or dead due to cancer	0
Blank(s)	Widowed	79	1924	2004	May	Female	White	C22.0-Liver	8010/3: Carcinoma, NOS	Unknown	8.6.3 Carcinoma of liver and intrahepatic bile ducts	VII(b) Hepatic carcinomas	Radiography without microscopic confirm	UNK Stage	T1	NX	M0	Blank(s)	Blank(s)	Blank(s)	Blank(s)	Blank(s)	Localized	0	None	None; diagnosed at autopsy	998	999	Blank(s)	Blank(s)	Blank(s)	Blank(s)	Blank(s)	Blank(s)	Blank(s)	Blank(s)	Blank(s)	Blank(s)	Blank(s)	Blank(s)	Blank(s)	988	0	98	Blank(s)	Chronic Obstructive Pulmonary Disease and Allied Cond	Alive or dead of other cause	Dead (attributable to causes other than this cancer dx)	0
Blank(s)	Married (including common law)	51	1953	2004	October	Male	White	C22.0-Liver	8170/3: Hepatocellular carcinoma, NOS	Unknown	8.6.3 Carcinoma of liver and intrahepatic bile ducts	VII(b) Hepatic carcinomas	Positive histology	UNK Stage	T4	NX	MX	Blank(s)	Blank(s)	Blank(s)	Blank(s)	Blank(s)	Regional	90	None	None; diagnosed at autopsy	999	999	Blank(s)	Blank(s)	Blank(s)	Blank(s)	Blank(s)	Blank(s)	Blank(s)	Blank(s)	Blank(s)	Blank(s)	Blank(s)	Blank(s)	Blank(s)	988	0	98	Blank(s)	Liver	Dead (attributable to this cancer dx)	Alive or dead due to cancer	0
Blank(s)	Married (including common law)	85	1919	2004	May	Female	White	C22.1-Intrahepatic bile duct	8160/3: Cholangiocarcinoma	Unknown	8.6.3 Carcinoma of liver and intrahepatic bile ducts	VII(b) Hepatic carcinomas	Positive histology	IV	TX	N0	M1	Blank(s)	Blank(s)	Blank(s)	Blank(s)	Blank(s)	Distant	0	None	None; diagnosed at autopsy	999	999	Blank(s)	Blank(s)	Blank(s)	Blank(s)	Blank(s)	Blank(s)	Blank(s)	Blank(s)	Blank(s)	Blank(s)	Blank(s)	Blank(s)	Blank(s)	988	0	98	Blank(s)	Intrahepatic Bile Duct	Dead (attributable to this cancer dx)	Alive or dead due to cancer	2
Blank(s)	Married (including common law)	60	1944	2004	May	Male	White	C22.0-Liver	8170/3: Hepatocellular carcinoma, NOS	Unknown	8.6.3 Carcinoma of liver and intrahepatic bile ducts	VII(b) Hepatic carcinomas	Radiography without microscopic confirm	IV	TX	N1	M1	Blank(s)	Blank(s)	Blank(s)	Blank(s)	Blank(s)	Distant	0	None	None; diagnosed at autopsy	10	999	Blank(s)	Blank(s)	Blank(s)	Blank(s)	Blank(s)	Blank(s)	Blank(s)	Blank(s)	Blank(s)	Blank(s)	Blank(s)	Blank(s)	Blank(s)	988	0	98	Blank(s)	Liver	Dead (attributable to this cancer dx)	Alive or dead due to cancer	4
Insured	Married (including common law)	91	1919	2010	December	Female	White	C22.0-Liver	8170/3: Hepatocellular carcinoma, NOS	Unknown	8.6.3 Carcinoma of liver and intrahepatic bile ducts	VII(b) Hepatic carcinomas	Positive histology	IIIA	T3	N0	M0	Blank(s)	Blank(s)	Blank(s)	Blank(s)	Blank(s)	Localized	0	None	None; diagnosed at autopsy	10	999	Blank(s)	Blank(s)	Blank(s)	Blank(s)	Blank(s)	Blank(s)	Blank(s)	Blank(s)	Blank(s)	Blank(s)	Blank(s)	Blank(s)	Blank(s)	988	0	98	Blank(s)	Liver	N/A not first tumor	N/A not first tumor	4
Blank(s)	Single (never married)	59	1944	2004	March	Female	White	C22.0-Liver	8170/3: Hepatocellular carcinoma, NOS	Unknown	8.6.3 Carcinoma of liver and intrahepatic bile ducts	VII(b) Hepatic carcinomas	Positive exfoliative cytology, no positive histology	UNK Stage	TX	NX	M0	Blank(s)	Blank(s)	Blank(s)	Blank(s)	Blank(s)	Localized	0	None	None; diagnosed at autopsy	999	999	Blank(s)	Blank(s)	Blank(s)	Blank(s)	Blank(s)	Blank(s)	Blank(s)	Blank(s)	Blank(s)	Blank(s)	Blank(s)	Blank(s)	Blank(s)	988	0	98	Blank(s)	State DC not available or state DC available but no COD	Dead (missing/unknown COD)	Dead (missing/unknown COD)	27
Blank(s)	Divorced	54	1949	2004	April	Male	Black	C22.0-Liver	8170/3: Hepatocellular carcinoma, NOS	Unknown	8.6.3 Carcinoma of liver and intrahepatic bile ducts	VII(b) Hepatic carcinomas	Radiography without microscopic confirm	UNK Stage	TX	N1	MX	Blank(s)	Blank(s)	Blank(s)	Blank(s)	Blank(s)	Regional	0	None	None; diagnosed at autopsy	10	999	Blank(s)	Blank(s)	Blank(s)	Blank(s)	Blank(s)	Blank(s)	Blank(s)	Blank(s)	Blank(s)	Blank(s)	Blank(s)	Blank(s)	Blank(s)	988	0	98	Blank(s)	Liver	Dead (attributable to this cancer dx)	Alive or dead due to cancer	2
Blank(s)	Divorced	55	1948	2004	February	Male	White	C22.0-Liver	8170/3: Hepatocellular carcinoma, NOS	Moderately differentiated; Grade II	8.6.3 Carcinoma of liver and intrahepatic bile ducts	VII(b) Hepatic carcinomas	Positive histology	I	T1	N0	M0	Blank(s)	Blank(s)	Blank(s)	Blank(s)	Blank(s)	Localized	22	None	None; diagnosed at autopsy	10	999	Blank(s)	Blank(s)	Blank(s)	Blank(s)	Blank(s)	Blank(s)	Blank(s)	Blank(s)	Blank(s)	Blank(s)	Blank(s)	Blank(s)	Blank(s)	988	0	98	Blank(s)	Liver	Dead (attributable to this cancer dx)	Alive or dead due to cancer	32
Blank(s)	Married (including common law)	67	1937	2004	June	Male	Black	C22.0-Liver	8170/3: Hepatocellular carcinoma, NOS	Poorly differentiated; Grade III	8.6.3 Carcinoma of liver and intrahepatic bile ducts	VII(b) Hepatic carcinomas	Positive exfoliative cytology, no positive histology	I	T1	N0	M0	Blank(s)	Blank(s)	Blank(s)	Blank(s)	Blank(s)	Localized	0	None	None; diagnosed at autopsy	999	999	Blank(s)	Blank(s)	Blank(s)	Blank(s)	Blank(s)	Blank(s)	Blank(s)	Blank(s)	Blank(s)	Blank(s)	Blank(s)	Blank(s)	Blank(s)	988	0	98	Blank(s)	Liver	Dead (attributable to this cancer dx)	Alive or dead due to cancer	2
Blank(s)	Divorced	80	1923	2004	April	Male	White	C22.1-Intrahepatic bile duct	8160/3: Cholangiocarcinoma	Unknown	8.6.3 Carcinoma of liver and intrahepatic bile ducts	VII(b) Hepatic carcinomas	Positive exfoliative cytology, no positive histology	UNK Stage	TX	NX	MX	Blank(s)	Blank(s)	Blank(s)	Blank(s)	Blank(s)	Unknown/unstaged	0	None	None; diagnosed at autopsy	10	999	Blank(s)	Blank(s)	Blank(s)	Blank(s)	Blank(s)	Blank(s)	Blank(s)	Blank(s)	Blank(s)	Blank(s)	Blank(s)	Blank(s)	Blank(s)	988	0	98	Blank(s)	Intrahepatic Bile Duct	Dead (attributable to this cancer dx)	Alive or dead due to cancer	2
Blank(s)	Married (including common law)	53	1951	2004	May	Male	Other (American Indian/AK Native, Asian/Pacific Islander)	C22.0-Liver	8170/3: Hepatocellular carcinoma, NOS	Well differentiated; Grade I	8.6.3 Carcinoma of liver and intrahepatic bile ducts	VII(b) Hepatic carcinomas	Positive histology	UNK Stage	TX	N0	M0	Blank(s)	Blank(s)	Blank(s)	Blank(s)	Blank(s)	Regional	16	None	None; diagnosed at autopsy	999	999	Blank(s)	Blank(s)	Blank(s)	Blank(s)	Blank(s)	Blank(s)	Blank(s)	Blank(s)	Blank(s)	Blank(s)	Blank(s)	Blank(s)	Blank(s)	988	0	98	Blank(s)	Miscellaneous Malignant Cancer	Dead (attributable to this cancer dx)	Alive or dead due to cancer	16
Blank(s)	Separated	85	1918	2004	April	Male	White	C22.0-Liver	8170/3: Hepatocellular carcinoma, NOS	Unknown	8.6.3 Carcinoma of liver and intrahepatic bile ducts	VII(b) Hepatic carcinomas	Positive histology	I	T1	N0	M0	Blank(s)	Blank(s)	Blank(s)	Blank(s)	Blank(s)	Localized	0	None	None; diagnosed at autopsy	10	999	Blank(s)	Blank(s)	Blank(s)	Blank(s)	Blank(s)	Blank(s)	Blank(s)	Blank(s)	Blank(s)	Blank(s)	Blank(s)	Blank(s)	Blank(s)	988	0	98	Blank(s)	Liver	Dead (attributable to this cancer dx)	Alive or dead due to cancer	27
Blank(s)	Single (never married)	56	1947	2004	January	Male	White	C22.0-Liver	8170/3: Hepatocellular carcinoma, NOS	Unknown	8.6.3 Carcinoma of liver and intrahepatic bile ducts	VII(b) Hepatic carcinomas	Radiography without microscopic confirm	I	T1	N0	M0	Blank(s)	Blank(s)	Blank(s)	Blank(s)	Blank(s)	Localized	61	None	None; diagnosed at autopsy	10	999	Blank(s)	Blank(s)	Blank(s)	Blank(s)	Blank(s)	Blank(s)	Blank(s)	Blank(s)	Blank(s)	Blank(s)	Blank(s)	Blank(s)	Blank(s)	988	0	98	Blank(s)	Alive	Alive or dead of other cause	Alive or dead due to cancer	155
Blank(s)	Single (never married)	55	1949	2004	December	Male	White	C22.0-Liver	8170/3: Hepatocellular carcinoma, NOS	Unknown	8.6.3 Carcinoma of liver and intrahepatic bile ducts	VII(b) Hepatic carcinomas	Positive histology	IIIA	T3	N0	M0	Blank(s)	Blank(s)	Blank(s)	Blank(s)	Blank(s)	Regional	0	None	None; diagnosed at autopsy	10	999	Blank(s)	Blank(s)	Blank(s)	Blank(s)	Blank(s)	Blank(s)	Blank(s)	Blank(s)	Blank(s)	Blank(s)	Blank(s)	Blank(s)	Blank(s)	988	0	98	Blank(s)	Liver	Dead (attributable to this cancer dx)	Alive or dead due to cancer	0
Blank(s)	Married (including common law)	72	1932	2004	November	Male	Other (American Indian/AK Native, Asian/Pacific Islander)	C22.0-Liver	8170/3: Hepatocellular carcinoma, NOS	Moderately differentiated; Grade II	8.6.3 Carcinoma of liver and intrahepatic bile ducts	VII(b) Hepatic carcinomas	Positive histology	I	T1	N0	M0	Blank(s)	Blank(s)	Blank(s)	Blank(s)	Blank(s)	Localized	0	None	None; diagnosed at autopsy	10	0	Blank(s)	Blank(s)	Blank(s)	Blank(s)	Blank(s)	Blank(s)	Blank(s)	Blank(s)	Blank(s)	Blank(s)	Blank(s)	Blank(s)	Blank(s)	988	0	98	Blank(s)	Liver	Dead (attributable to this cancer dx)	Alive or dead due to cancer	113
Blank(s)	Married (including common law)	63	1941	2004	November	Male	Other (American Indian/AK Native, Asian/Pacific Islander)	C22.0-Liver	8170/3: Hepatocellular carcinoma, NOS	Unknown	8.6.3 Carcinoma of liver and intrahepatic bile ducts	VII(b) Hepatic carcinomas	Positive laboratory test/marker study	IV	TX	N0	M1	Blank(s)	Blank(s)	Blank(s)	Blank(s)	Blank(s)	Distant	0	None	None; diagnosed at autopsy	10	999	Blank(s)	Blank(s)	Blank(s)	Blank(s)	Blank(s)	Blank(s)	Blank(s)	Blank(s)	Blank(s)	Blank(s)	Blank(s)	Blank(s)	Blank(s)	988	0	98	Blank(s)	Other Infectious and Parasitic Diseases including HIV	Alive or dead of other cause	Dead (attributable to causes other than this cancer dx)	0
Blank(s)	Married (including common law)	54	1949	2004	July	Male	Other (American Indian/AK Native, Asian/Pacific Islander)	C22.0-Liver	8170/3: Hepatocellular carcinoma, NOS	Unknown	8.6.3 Carcinoma of liver and intrahepatic bile ducts	VII(b) Hepatic carcinomas	Radiography without microscopic confirm	IIIC	T3	N1	M0	Blank(s)	Blank(s)	Blank(s)	Blank(s)	Blank(s)	Regional	0	None	None; diagnosed at autopsy	999	999	Blank(s)	Blank(s)	Blank(s)	Blank(s)	Blank(s)	Blank(s)	Blank(s)	Blank(s)	Blank(s)	Blank(s)	Blank(s)	Blank(s)	Blank(s)	988	0	98	Blank(s)	Alive	Alive or dead of other cause	Alive or dead due to cancer	20
Blank(s)	Married (including common law)	55	1949	2004	October	Male	Black	C22.0-Liver	8170/3: Hepatocellular carcinoma, NOS	Moderately differentiated; Grade II	8.6.3 Carcinoma of liver and intrahepatic bile ducts	VII(b) Hepatic carcinomas	Positive histology	I	T1	N0	M0	Blank(s)	Blank(s)	Blank(s)	Blank(s)	Blank(s)	Localized	26	None	None; diagnosed at autopsy	10	0	Blank(s)	Blank(s)	Blank(s)	Blank(s)	Blank(s)	Blank(s)	Blank(s)	Blank(s)	Blank(s)	Blank(s)	Blank(s)	Blank(s)	Blank(s)	988	0	98	Blank(s)	Other Cause of Death	Dead (attributable to this cancer dx)	Alive or dead due to cancer	41
Blank(s)	Married (including common law)	56	1948	2004	June	Male	White	C22.0-Liver	8170/3: Hepatocellular carcinoma, NOS	Unknown	8.6.3 Carcinoma of liver and intrahepatic bile ducts	VII(b) Hepatic carcinomas	Radiography without microscopic confirm	IIIC	T1	N1	M0	Blank(s)	Blank(s)	Blank(s)	Blank(s)	Blank(s)	Regional	0	None	None; diagnosed at autopsy	10	999	Blank(s)	Blank(s)	Blank(s)	Blank(s)	Blank(s)	Blank(s)	Blank(s)	Blank(s)	Blank(s)	Blank(s)	Blank(s)	Blank(s)	Blank(s)	988	0	98	Blank(s)	Other Infectious and Parasitic Diseases including HIV	Alive or dead of other cause	Dead (attributable to causes other than this cancer dx)	1
Blank(s)	Single (never married)	49	1955	2004	July	Male	Other (American Indian/AK Native, Asian/Pacific Islander)	C22.0-Liver	8170/3: Hepatocellular carcinoma, NOS	Unknown	8.6.3 Carcinoma of liver and intrahepatic bile ducts	VII(b) Hepatic carcinomas	Radiography without microscopic confirm	IIIC	T1	N1	M0	Blank(s)	Blank(s)	Blank(s)	Blank(s)	Blank(s)	Regional	0	None	None; diagnosed at autopsy	20	999	Blank(s)	Blank(s)	Blank(s)	Blank(s)	Blank(s)	Blank(s)	Blank(s)	Blank(s)	Blank(s)	Blank(s)	Blank(s)	Blank(s)	Blank(s)	988	98	97	Blank(s)	Liver	Dead (attributable to this cancer dx)	Alive or dead due to cancer	66
Blank(s)	Divorced	59	1944	2004	April	Male	Black	C22.0-Liver	8170/3: Hepatocellular carcinoma, NOS	Unknown	8.6.3 Carcinoma of liver and intrahepatic bile ducts	VII(b) Hepatic carcinomas	Positive histology	IV	T3	N1	M1	Blank(s)	Blank(s)	Blank(s)	Blank(s)	Blank(s)	Distant	0	None	None; diagnosed at autopsy	10	999	Blank(s)	Blank(s)	Blank(s)	Blank(s)	Blank(s)	Blank(s)	Blank(s)	Blank(s)	Blank(s)	Blank(s)	Blank(s)	Blank(s)	Blank(s)	988	0	98	Blank(s)	Liver	Dead (attributable to this cancer dx)	Alive or dead due to cancer	8
Blank(s)	Married (including common law)	71	1932	2004	July	Male	White	C22.0-Liver	8170/3: Hepatocellular carcinoma, NOS	Unknown	8.6.3 Carcinoma of liver and intrahepatic bile ducts	VII(b) Hepatic carcinomas	Radiography without microscopic confirm	I	T1	N0	M0	Blank(s)	Blank(s)	Blank(s)	Blank(s)	Blank(s)	Localized	0	None	None; diagnosed at autopsy	10	999	Blank(s)	Blank(s)	Blank(s)	Blank(s)	Blank(s)	Blank(s)	Blank(s)	Blank(s)	Blank(s)	Blank(s)	Blank(s)	Blank(s)	Blank(s)	988	0	98	Blank(s)	Liver	Dead (attributable to this cancer dx)	Alive or dead due to cancer	14
Blank(s)	Married (including common law)	46	1958	2004	August	Male	White	C22.0-Liver	8170/3: Hepatocellular carcinoma, NOS	Well differentiated; Grade I	8.6.3 Carcinoma of liver and intrahepatic bile ducts	VII(b) Hepatic carcinomas	Positive histology	I	T1	N0	M0	Blank(s)	Blank(s)	Blank(s)	Blank(s)	Blank(s)	Localized	61	None	None; diagnosed at autopsy	999	999	Blank(s)	Blank(s)	Blank(s)	Blank(s)	Blank(s)	Blank(s)	Blank(s)	Blank(s)	Blank(s)	Blank(s)	Blank(s)	Blank(s)	Blank(s)	988	0	98	Blank(s)	Alive	Alive or dead of other cause	Alive or dead due to cancer	148
Blank(s)	Single (never married)	52	1952	2004	November	Male	White	C22.0-Liver	8170/3: Hepatocellular carcinoma, NOS	Unknown	8.6.3 Carcinoma of liver and intrahepatic bile ducts	VII(b) Hepatic carcinomas	Radiography without microscopic confirm	UNK Stage	TX	NX	M0	Blank(s)	Blank(s)	Blank(s)	Blank(s)	Blank(s)	Regional	0	None	None; diagnosed at autopsy	999	999	Blank(s)	Blank(s)	Blank(s)	Blank(s)	Blank(s)	Blank(s)	Blank(s)	Blank(s)	Blank(s)	Blank(s)	Blank(s)	Blank(s)	Blank(s)	988	0	98	Blank(s)	Liver	Dead (attributable to this cancer dx)	Alive or dead due to cancer	36
Blank(s)	Unknown	53	1951	2004	November	Male	Black	C22.0-Liver	8170/3: Hepatocellular carcinoma, NOS	Unknown	8.6.3 Carcinoma of liver and intrahepatic bile ducts	VII(b) Hepatic carcinomas	Positive histology	IIINOS	T3	NX	M0	Blank(s)	Blank(s)	Blank(s)	Blank(s)	Blank(s)	Regional	0	None	None; diagnosed at autopsy	10	999	Blank(s)	Blank(s)	Blank(s)	Blank(s)	Blank(s)	Blank(s)	Blank(s)	Blank(s)	Blank(s)	Blank(s)	Blank(s)	Blank(s)	Blank(s)	988	0	98	Blank(s)	Liver	Dead (attributable to this cancer dx)	Alive or dead due to cancer	0
Blank(s)	Divorced	68	1935	2004	April	Male	Black	C22.0-Liver	8170/3: Hepatocellular carcinoma, NOS	Unknown	8.6.3 Carcinoma of liver and intrahepatic bile ducts	VII(b) Hepatic carcinomas	Radiography without microscopic confirm	UNK Stage	TX	NX	MX	Blank(s)	Blank(s)	Blank(s)	Blank(s)	Blank(s)	Regional	0	None	None; diagnosed at autopsy	10	999	Blank(s)	Blank(s)	Blank(s)	Blank(s)	Blank(s)	Blank(s)	Blank(s)	Blank(s)	Blank(s)	Blank(s)	Blank(s)	Blank(s)	Blank(s)	988	0	98	Blank(s)	Other Infectious and Parasitic Diseases including HIV	Alive or dead of other cause	Dead (attributable to causes other than this cancer dx)	0
Blank(s)	Single (never married)	72	1931	2004	March	Male	White	C22.0-Liver	8170/3: Hepatocellular carcinoma, NOS	Well differentiated; Grade I	8.6.3 Carcinoma of liver and intrahepatic bile ducts	VII(b) Hepatic carcinomas	Positive exfoliative cytology, no positive histology	UNK Stage	T1	NX	M0	Blank(s)	Blank(s)	Blank(s)	Blank(s)	Blank(s)	Localized	0	None	None; diagnosed at autopsy	20	999	Blank(s)	Blank(s)	Blank(s)	Blank(s)	Blank(s)	Blank(s)	Blank(s)	Blank(s)	Blank(s)	Blank(s)	Blank(s)	Blank(s)	Blank(s)	988	0	98	Blank(s)	Liver	Dead (attributable to this cancer dx)	Alive or dead due to cancer	32
Blank(s)	Married (including common law)	55	1949	2004	February	Male	White	C22.0-Liver	8170/3: Hepatocellular carcinoma, NOS	Unknown	8.6.3 Carcinoma of liver and intrahepatic bile ducts	VII(b) Hepatic carcinomas	Radiography without microscopic confirm	I	T1	N0	M0	Blank(s)	Blank(s)	Blank(s)	Blank(s)	Blank(s)	Localized	0	None	None; diagnosed at autopsy	20	999	Blank(s)	Blank(s)	Blank(s)	Blank(s)	Blank(s)	Blank(s)	Blank(s)	Blank(s)	Blank(s)	Blank(s)	Blank(s)	Blank(s)	Blank(s)	988	0	98	Blank(s)	Liver	Dead (attributable to this cancer dx)	Alive or dead due to cancer	83
Blank(s)	Married (including common law)	71	1932	2004	July	Female	White	C22.0-Liver	8170/3: Hepatocellular carcinoma, NOS	Unknown	8.6.3 Carcinoma of liver and intrahepatic bile ducts	VII(b) Hepatic carcinomas	Radiography without microscopic confirm	I	T1	N0	M0	Blank(s)	Blank(s)	Blank(s)	Blank(s)	Blank(s)	Localized	0	None	None; diagnosed at autopsy	999	999	Blank(s)	Blank(s)	Blank(s)	Blank(s)	Blank(s)	Blank(s)	Blank(s)	Blank(s)	Blank(s)	Blank(s)	Blank(s)	Blank(s)	Blank(s)	988	0	98	Blank(s)	Liver	Dead (attributable to this cancer dx)	Alive or dead due to cancer	3
Blank(s)	Married (including common law)	77	1927	2004	November	Male	White	C22.0-Liver	8170/3: Hepatocellular carcinoma, NOS	Well differentiated; Grade I	8.6.3 Carcinoma of liver and intrahepatic bile ducts	VII(b) Hepatic carcinomas	Positive histology	I	T1	N0	M0	Blank(s)	Blank(s)	Blank(s)	Blank(s)	Blank(s)	Localized	0	None	None; diagnosed at autopsy	20	999	Blank(s)	Blank(s)	Blank(s)	Blank(s)	Blank(s)	Blank(s)	Blank(s)	Blank(s)	Blank(s)	Blank(s)	Blank(s)	Blank(s)	Blank(s)	988	0	98	Blank(s)	Liver	Dead (attributable to this cancer dx)	Alive or dead due to cancer	47
Blank(s)	Married (including common law)	81	1923	2004	November	Male	White	C22.0-Liver	8170/3: Hepatocellular carcinoma, NOS	Well differentiated; Grade I	8.6.3 Carcinoma of liver and intrahepatic bile ducts	VII(b) Hepatic carcinomas	Positive histology	I	T1	N0	M0	Blank(s)	Blank(s)	Blank(s)	Blank(s)	Blank(s)	Localized	0	None	None; diagnosed at autopsy	20	999	Blank(s)	Blank(s)	Blank(s)	Blank(s)	Blank(s)	Blank(s)	Blank(s)	Blank(s)	Blank(s)	Blank(s)	Blank(s)	Blank(s)	Blank(s)	988	0	98	Blank(s)	Liver	Dead (attributable to this cancer dx)	Alive or dead due to cancer	14
Blank(s)	Married (including common law)	74	1930	2004	June	Male	White	C22.0-Liver	8170/3: Hepatocellular carcinoma, NOS	Unknown	8.6.3 Carcinoma of liver and intrahepatic bile ducts	VII(b) Hepatic carcinomas	Positive laboratory test/marker study	UNK Stage	T3	N0	MX	Blank(s)	Blank(s)	Blank(s)	Blank(s)	Blank(s)	Regional	0	None	None; diagnosed at autopsy	10	999	Blank(s)	Blank(s)	Blank(s)	Blank(s)	Blank(s)	Blank(s)	Blank(s)	Blank(s)	Blank(s)	Blank(s)	Blank(s)	Blank(s)	Blank(s)	988	0	98	Blank(s)	Liver	Dead (attributable to this cancer dx)	Alive or dead due to cancer	1
Blank(s)	Single (never married)	47	1957	2005	January	Male	Other (American Indian/AK Native, Asian/Pacific Islander)	C22.0-Liver	8170/3: Hepatocellular carcinoma, NOS	Unknown	8.6.3 Carcinoma of liver and intrahepatic bile ducts	VII(b) Hepatic carcinomas	Positive laboratory test/marker study	I	T1	N0	M0	Blank(s)	Blank(s)	Blank(s)	Blank(s)	Blank(s)	Localized	0	None	None; diagnosed at autopsy	10	999	Blank(s)	Blank(s)	Blank(s)	Blank(s)	Blank(s)	Blank(s)	Blank(s)	Blank(s)	Blank(s)	Blank(s)	Blank(s)	Blank(s)	Blank(s)	988	0	98	Blank(s)	Alive	Alive or dead of other cause	Alive or dead due to cancer	1
Blank(s)	Married (including common law)	50	1953	2004	August	Male	White	C22.1-Intrahepatic bile duct	8160/3: Cholangiocarcinoma	Unknown	8.6.3 Carcinoma of liver and intrahepatic bile ducts	VII(b) Hepatic carcinomas	Positive exfoliative cytology, no positive histology	IV	T3	N1	M1	Blank(s)	Blank(s)	Blank(s)	Blank(s)	Blank(s)	Distant	0	None	None; diagnosed at autopsy	20	999	Blank(s)	Blank(s)	Blank(s)	Blank(s)	Blank(s)	Blank(s)	Blank(s)	Blank(s)	Blank(s)	Blank(s)	Blank(s)	Blank(s)	Blank(s)	988	0	98	Blank(s)	Intrahepatic Bile Duct	Dead (attributable to this cancer dx)	Alive or dead due to cancer	4
Blank(s)	Married (including common law)	70	1933	2004	May	Male	Other (American Indian/AK Native, Asian/Pacific Islander)	C22.0-Liver	8170/3: Hepatocellular carcinoma, NOS	Unknown	8.6.3 Carcinoma of liver and intrahepatic bile ducts	VII(b) Hepatic carcinomas	Positive histology	IV	T1	N0	M1	Blank(s)	Blank(s)	Blank(s)	Blank(s)	Blank(s)	Distant	0	None	None; diagnosed at autopsy	999	999	Blank(s)	Blank(s)	Blank(s)	Blank(s)	Blank(s)	Blank(s)	Blank(s)	Blank(s)	Blank(s)	Blank(s)	Blank(s)	Blank(s)	Blank(s)	988	0	98	Blank(s)	Other Digestive Organs	Dead (attributable to this cancer dx)	Alive or dead due to cancer	25
Blank(s)	Single (never married)	55	1949	2004	June	Male	White	C22.0-Liver	8170/3: Hepatocellular carcinoma, NOS	Unknown	8.6.3 Carcinoma of liver and intrahepatic bile ducts	VII(b) Hepatic carcinomas	Radiography without microscopic confirm	I	T1	N0	M0	Blank(s)	Blank(s)	Blank(s)	Blank(s)	Blank(s)	Localized	0	None	None; diagnosed at autopsy	10	999	Blank(s)	Blank(s)	Blank(s)	Blank(s)	Blank(s)	Blank(s)	Blank(s)	Blank(s)	Blank(s)	Blank(s)	Blank(s)	Blank(s)	Blank(s)	988	0	98	Blank(s)	Other Infectious and Parasitic Diseases including HIV	Alive or dead of other cause	Dead (attributable to causes other than this cancer dx)	2
Blank(s)	Married (including common law)	66	1937	2004	February	Male	Other (American Indian/AK Native, Asian/Pacific Islander)	C22.0-Liver	8170/3: Hepatocellular carcinoma, NOS	Unknown	8.6.3 Carcinoma of liver and intrahepatic bile ducts	VII(b) Hepatic carcinomas	Positive histology	IIIA	T3	N0	M0	Blank(s)	Blank(s)	Blank(s)	Blank(s)	Blank(s)	Regional	0	None	None; diagnosed at autopsy	10	999	Blank(s)	Blank(s)	Blank(s)	Blank(s)	Blank(s)	Blank(s)	Blank(s)	Blank(s)	Blank(s)	Blank(s)	Blank(s)	Blank(s)	Blank(s)	988	0	98	Blank(s)	Liver	Dead (attributable to this cancer dx)	Alive or dead due to cancer	24
Blank(s)	Widowed	60	1944	2004	July	Male	White	C22.0-Liver	8170/3: Hepatocellular carcinoma, NOS	Unknown	8.6.3 Carcinoma of liver and intrahepatic bile ducts	VII(b) Hepatic carcinomas	Positive histology	I	T1	N0	M0	Blank(s)	Blank(s)	Blank(s)	Blank(s)	Blank(s)	Localized	0	None	None; diagnosed at autopsy	10	999	Blank(s)	Blank(s)	Blank(s)	Blank(s)	Blank(s)	Blank(s)	Blank(s)	Blank(s)	Blank(s)	Blank(s)	Blank(s)	Blank(s)	Blank(s)	988	0	98	Blank(s)	Liver	Dead (attributable to this cancer dx)	Alive or dead due to cancer	4
Blank(s)	Married (including common law)	50	1954	2004	Blank(s)	Male	Other (American Indian/AK Native, Asian/Pacific Islander)	C22.0-Liver	8170/3: Hepatocellular carcinoma, NOS	Unknown	8.6.3 Carcinoma of liver and intrahepatic bile ducts	VII(b) Hepatic carcinomas	Radiography without microscopic confirm	I	T1	N0	M0	Blank(s)	Blank(s)	Blank(s)	Blank(s)	Blank(s)	Localized	0	None	None; diagnosed at autopsy	20	999	Blank(s)	Blank(s)	Blank(s)	Blank(s)	Blank(s)	Blank(s)	Blank(s)	Blank(s)	Blank(s)	Blank(s)	Blank(s)	Blank(s)	Blank(s)	988	0	98	Blank(s)	Alive	Alive or dead of other cause	Alive or dead due to cancer	23
Blank(s)	Widowed	70	1933	2004	July	Female	Other (American Indian/AK Native, Asian/Pacific Islander)	C22.0-Liver	8170/3: Hepatocellular carcinoma, NOS	Moderately differentiated; Grade II	8.6.3 Carcinoma of liver and intrahepatic bile ducts	VII(b) Hepatic carcinomas	Positive exfoliative cytology, no positive histology	IV	TX	N0	M1	Blank(s)	Blank(s)	Blank(s)	Blank(s)	Blank(s)	Distant	0	None	None; diagnosed at autopsy	999	999	Blank(s)	Blank(s)	Blank(s)	Blank(s)	Blank(s)	Blank(s)	Blank(s)	Blank(s)	Blank(s)	Blank(s)	Blank(s)	Blank(s)	Blank(s)	988	0	98	Blank(s)	Liver	Dead (attributable to this cancer dx)	Alive or dead due to cancer	8
Insured	Divorced	82	1932	2014	October	Male	White	C22.0-Liver	8170/3: Hepatocellular carcinoma, NOS	Unknown	8.6.3 Carcinoma of liver and intrahepatic bile ducts	VII(b) Hepatic carcinomas	Radiography without microscopic confirm	II	T2	N0	M0	Blank(s)	Blank(s)	Blank(s)	Blank(s)	Blank(s)	Regional	0	None	None; diagnosed at autopsy	10	999	Blank(s)	Blank(s)	Blank(s)	Blank(s)	Blank(s)	Blank(s)	Blank(s)	Blank(s)	Blank(s)	Blank(s)	Blank(s)	Blank(s)	Blank(s)	988	0	98	Blank(s)	Liver	N/A not first tumor	N/A not first tumor	19
Any Medicaid	Married (including common law)	72	1938	2010	November	Female	White	C22.0-Liver	8010/3: Carcinoma, NOS	Unknown	8.6.3 Carcinoma of liver and intrahepatic bile ducts	VII(b) Hepatic carcinomas	Radiography without microscopic confirm	UNK Stage	T1	NX	MX	Blank(s)	Blank(s)	Blank(s)	Blank(s)	Blank(s)	Localized	0	None	None; diagnosed at autopsy	998	999	Blank(s)	Blank(s)	Blank(s)	Blank(s)	Blank(s)	Blank(s)	Blank(s)	Blank(s)	Blank(s)	Blank(s)	Blank(s)	Blank(s)	Blank(s)	988	0	98	Blank(s)	Liver	Dead (attributable to this cancer dx)	Alive or dead due to cancer	2
Blank(s)	Single (never married)	1	2003	2004	December	Male	White	C22.0-Liver	8970/3: Hepatoblastoma	Unknown	9.1.3 Other pediatric and embryonal tumors, NOS	VII(a) Hepatoblastoma	Positive histology	NA	NA	NA	NA	Blank(s)	Blank(s)	Blank(s)	Blank(s)	Blank(s)	Distant	0	None	Non-primary surgical procedure to distant site	998	999	Blank(s)	Blank(s)	Blank(s)	Blank(s)	Blank(s)	Blank(s)	Blank(s)	Blank(s)	Blank(s)	Blank(s)	Blank(s)	Blank(s)	Blank(s)	988	0	98	Blank(s)	Alive	Alive or dead of other cause	Alive or dead due to cancer	84
Blank(s)	Married (including common law)	62	1942	2004	October	Male	Other (American Indian/AK Native, Asian/Pacific Islander)	C22.0-Liver	8170/3: Hepatocellular carcinoma, NOS	Moderately differentiated; Grade II	8.6.3 Carcinoma of liver and intrahepatic bile ducts	VII(b) Hepatic carcinomas	Positive histology	II	T2	N0	M0	Blank(s)	Blank(s)	Blank(s)	Blank(s)	Blank(s)	Regional	61	None	None; diagnosed at autopsy	10	999	Blank(s)	Blank(s)	Blank(s)	Blank(s)	Blank(s)	Blank(s)	Blank(s)	Blank(s)	Blank(s)	Blank(s)	Blank(s)	Blank(s)	Blank(s)	988	0	98	Blank(s)	Alive	Alive or dead of other cause	Alive or dead due to cancer	146
Blank(s)	Married (including common law)	56	1948	2004	May	Male	Other (American Indian/AK Native, Asian/Pacific Islander)	C22.0-Liver	8170/3: Hepatocellular carcinoma, NOS	Moderately differentiated; Grade II	8.6.3 Carcinoma of liver and intrahepatic bile ducts	VII(b) Hepatic carcinomas	Positive histology	II	T2	N0	M0	Blank(s)	Blank(s)	Blank(s)	Blank(s)	Blank(s)	Regional	21	None	None; diagnosed at autopsy	10	999	Blank(s)	Blank(s)	Blank(s)	Blank(s)	Blank(s)	Blank(s)	Blank(s)	Blank(s)	Blank(s)	Blank(s)	Blank(s)	Blank(s)	Blank(s)	988	0	98	Blank(s)	Alive	Alive or dead of other cause	Alive or dead due to cancer	151
Blank(s)	Married (including common law)	56	1948	2004	November	Male	Other (American Indian/AK Native, Asian/Pacific Islander)	C22.0-Liver	8170/3: Hepatocellular carcinoma, NOS	Poorly differentiated; Grade III	8.6.3 Carcinoma of liver and intrahepatic bile ducts	VII(b) Hepatic carcinomas	Positive histology	IIIA	T3	N0	M0	Blank(s)	Blank(s)	Blank(s)	Blank(s)	Blank(s)	Regional	0	None	None; diagnosed at autopsy	999	999	Blank(s)	Blank(s)	Blank(s)	Blank(s)	Blank(s)	Blank(s)	Blank(s)	Blank(s)	Blank(s)	Blank(s)	Blank(s)	Blank(s)	Blank(s)	988	0	98	Blank(s)	Liver	Dead (attributable to this cancer dx)	Alive or dead due to cancer	0
Blank(s)	Widowed	63	1941	2004	December	Female	Other (American Indian/AK Native, Asian/Pacific Islander)	C22.0-Liver	8170/3: Hepatocellular carcinoma, NOS	Poorly differentiated; Grade III	8.6.3 Carcinoma of liver and intrahepatic bile ducts	VII(b) Hepatic carcinomas	Positive histology	I	T1	N0	M0	Blank(s)	Blank(s)	Blank(s)	Blank(s)	Blank(s)	Localized	16	None	None; diagnosed at autopsy	10	1	Blank(s)	Blank(s)	Blank(s)	Blank(s)	Blank(s)	Blank(s)	Blank(s)	Blank(s)	Blank(s)	Blank(s)	Blank(s)	Blank(s)	Blank(s)	988	0	98	Blank(s)	Lung and Bronchus	Alive or dead of other cause	Dead (attributable to causes other than this cancer dx)	129
Blank(s)	Married (including common law)	77	1926	2004	January	Male	White	C22.0-Liver	8170/3: Hepatocellular carcinoma, NOS	Unknown	8.6.3 Carcinoma of liver and intrahepatic bile ducts	VII(b) Hepatic carcinomas	Radiography without microscopic confirm	UNK Stage	TX	NX	M0	Blank(s)	Blank(s)	Blank(s)	Blank(s)	Blank(s)	Unknown/unstaged	0	Unknown or not applicable	None; diagnosed at autopsy	999	999	Blank(s)	Blank(s)	Blank(s)	Blank(s)	Blank(s)	Blank(s)	Blank(s)	Blank(s)	Blank(s)	Blank(s)	Blank(s)	Blank(s)	Blank(s)	988	99	99	Blank(s)	Liver	Dead (attributable to this cancer dx)	Alive or dead due to cancer	3
Blank(s)	Single (never married)	1	2003	2004	November	Male	White	C22.0-Liver	8970/3: Hepatoblastoma	Unknown	9.1.3 Other pediatric and embryonal tumors, NOS	VII(a) Hepatoblastoma	Positive histology	NA	NA	NA	NA	Blank(s)	Blank(s)	Blank(s)	Blank(s)	Blank(s)	Localized	0	None	None; diagnosed at autopsy	10	0	Blank(s)	Blank(s)	Blank(s)	Blank(s)	Blank(s)	Blank(s)	Blank(s)	Blank(s)	Blank(s)	Blank(s)	Blank(s)	Blank(s)	Blank(s)	988	0	98	Blank(s)	Alive	Alive or dead of other cause	Alive or dead due to cancer	27
Blank(s)	Married (including common law)	57	1947	2004	August	Male	Other (American Indian/AK Native, Asian/Pacific Islander)	C22.0-Liver	8170/3: Hepatocellular carcinoma, NOS	Moderately differentiated; Grade II	8.6.3 Carcinoma of liver and intrahepatic bile ducts	VII(b) Hepatic carcinomas	Positive histology	IIIA	T3	N0	M0	Blank(s)	Blank(s)	Blank(s)	Blank(s)	Blank(s)	Regional	0	None	None; diagnosed at autopsy	999	999	Blank(s)	Blank(s)	Blank(s)	Blank(s)	Blank(s)	Blank(s)	Blank(s)	Blank(s)	Blank(s)	Blank(s)	Blank(s)	Blank(s)	Blank(s)	988	0	98	Blank(s)	Liver	Dead (attributable to this cancer dx)	Alive or dead due to cancer	2
Blank(s)	Widowed	67	1937	2004	September	Male	Other (American Indian/AK Native, Asian/Pacific Islander)	C22.0-Liver	8170/3: Hepatocellular carcinoma, NOS	Unknown	8.6.3 Carcinoma of liver and intrahepatic bile ducts	VII(b) Hepatic carcinomas	Unknown	IV	TX	N0	M1	Blank(s)	Blank(s)	Blank(s)	Blank(s)	Blank(s)	Distant	0	None	None; diagnosed at autopsy	999	999	Blank(s)	Blank(s)	Blank(s)	Blank(s)	Blank(s)	Blank(s)	Blank(s)	Blank(s)	Blank(s)	Blank(s)	Blank(s)	Blank(s)	Blank(s)	988	0	98	Blank(s)	Liver	Dead (attributable to this cancer dx)	Alive or dead due to cancer	4
Blank(s)	Married (including common law)	67	1936	2004	October	Female	Other (American Indian/AK Native, Asian/Pacific Islander)	C22.0-Liver	8170/3: Hepatocellular carcinoma, NOS	Poorly differentiated; Grade III	8.6.3 Carcinoma of liver and intrahepatic bile ducts	VII(b) Hepatic carcinomas	Positive histology	IV	T2	N1	M1	Blank(s)	Blank(s)	Blank(s)	Blank(s)	Blank(s)	Distant	0	None	None; diagnosed at autopsy	20	999	Blank(s)	Blank(s)	Blank(s)	Blank(s)	Blank(s)	Blank(s)	Blank(s)	Blank(s)	Blank(s)	Blank(s)	Blank(s)	Blank(s)	Blank(s)	988	0	98	Blank(s)	Liver	Dead (attributable to this cancer dx)	Alive or dead due to cancer	7
Blank(s)	Single (never married)	51	1953	2004	October	Male	White	C22.0-Liver	8170/3: Hepatocellular carcinoma, NOS	Unknown	8.6.3 Carcinoma of liver and intrahepatic bile ducts	VII(b) Hepatic carcinomas	Radiography without microscopic confirm	IIIA	T3	N0	M0	Blank(s)	Blank(s)	Blank(s)	Blank(s)	Blank(s)	Regional	0	None	None; diagnosed at autopsy	998	999	Blank(s)	Blank(s)	Blank(s)	Blank(s)	Blank(s)	Blank(s)	Blank(s)	Blank(s)	Blank(s)	Blank(s)	Blank(s)	Blank(s)	Blank(s)	988	0	98	Blank(s)	Liver	Dead (attributable to this cancer dx)	Alive or dead due to cancer	2
Blank(s)	Married (including common law)	57	1947	2004	Blank(s)	Male	Black	C22.0-Liver	8170/3: Hepatocellular carcinoma, NOS	Unknown	8.6.3 Carcinoma of liver and intrahepatic bile ducts	VII(b) Hepatic carcinomas	Direct visualization without microscopic confirmation	I	T1	N0	M0	Blank(s)	Blank(s)	Blank(s)	Blank(s)	Blank(s)	Localized	16	None	None; diagnosed at autopsy	20	999	Blank(s)	Blank(s)	Blank(s)	Blank(s)	Blank(s)	Blank(s)	Blank(s)	Blank(s)	Blank(s)	Blank(s)	Blank(s)	Blank(s)	Blank(s)	988	0	98	Blank(s)	Liver	Dead (attributable to this cancer dx)	Alive or dead due to cancer	32
Insured	Married (including common law)	69	1944	2014	June	Male	White	C22.1-Intrahepatic bile duct	8160/3: Cholangiocarcinoma	Unknown	8.6.3 Carcinoma of liver and intrahepatic bile ducts	VII(b) Hepatic carcinomas	Radiography without microscopic confirm	IIIC	T3	N1	M0	Blank(s)	Blank(s)	Blank(s)	Blank(s)	Blank(s)	Regional	0	None	None; diagnosed at autopsy	20	999	Blank(s)	Blank(s)	Blank(s)	Blank(s)	Blank(s)	Blank(s)	Blank(s)	Blank(s)	Blank(s)	Blank(s)	Blank(s)	Blank(s)	Blank(s)	988	0	98	Blank(s)	Intrahepatic Bile Duct	N/A not first tumor	N/A not first tumor	11
Insured	Unknown	86	1925	2011	August	Male	White	C22.0-Liver	8170/3: Hepatocellular carcinoma, NOS	Well differentiated; Grade I	8.6.3 Carcinoma of liver and intrahepatic bile ducts	VII(b) Hepatic carcinomas	Positive histology	UNK Stage	TX	N0	M0	Blank(s)	Blank(s)	Blank(s)	Blank(s)	Blank(s)	Unknown/unstaged	0	None	None; diagnosed at autopsy	20	999	Blank(s)	Blank(s)	Blank(s)	Blank(s)	Blank(s)	Blank(s)	Blank(s)	Blank(s)	Blank(s)	Blank(s)	Blank(s)	Blank(s)	Blank(s)	988	0	98	Blank(s)	Liver	N/A not first tumor	N/A not first tumor	33
Blank(s)	Married (including common law)	76	1928	2004	October	Female	White	C22.0-Liver	8170/3: Hepatocellular carcinoma, NOS	Well differentiated; Grade I	8.6.3 Carcinoma of liver and intrahepatic bile ducts	VII(b) Hepatic carcinomas	Positive histology	IV	T2	N0	M1	Blank(s)	Blank(s)	Blank(s)	Blank(s)	Blank(s)	Distant	0	None	None; diagnosed at autopsy	999	999	Blank(s)	Blank(s)	Blank(s)	Blank(s)	Blank(s)	Blank(s)	Blank(s)	Blank(s)	Blank(s)	Blank(s)	Blank(s)	Blank(s)	Blank(s)	988	0	98	Blank(s)	Liver	Dead (attributable to this cancer dx)	Alive or dead due to cancer	2
Blank(s)	Married (including common law)	82	1922	2004	October	Male	White	C22.1-Intrahepatic bile duct	8160/3: Cholangiocarcinoma	Unknown	8.6.3 Carcinoma of liver and intrahepatic bile ducts	VII(b) Hepatic carcinomas	Positive histology	IV	T1	N0	M1	Blank(s)	Blank(s)	Blank(s)	Blank(s)	Blank(s)	Distant	0	None	None; diagnosed at autopsy	999	999	Blank(s)	Blank(s)	Blank(s)	Blank(s)	Blank(s)	Blank(s)	Blank(s)	Blank(s)	Blank(s)	Blank(s)	Blank(s)	Blank(s)	Blank(s)	988	0	98	Blank(s)	Intrahepatic Bile Duct	Dead (attributable to this cancer dx)	Alive or dead due to cancer	0
Blank(s)	Married (including common law)	80	1923	2004	August	Male	Black	C22.0-Liver	8240/3: Carcinoid tumor, NOS	Unknown	8.6.3 Carcinoma of liver and intrahepatic bile ducts	VII(b) Hepatic carcinomas	Positive histology	NA	NA	NA	NA	Blank(s)	Blank(s)	Blank(s)	Blank(s)	Blank(s)	Regional	0	None	None; diagnosed at autopsy	998	999	Blank(s)	Blank(s)	Blank(s)	Blank(s)	Blank(s)	Blank(s)	Blank(s)	Blank(s)	Blank(s)	Blank(s)	Blank(s)	Blank(s)	Blank(s)	988	0	98	Blank(s)	Liver	Dead (attributable to this cancer dx)	Alive or dead due to cancer	79
Blank(s)	Married (including common law)	56	1948	2004	September	Male	Black	C22.0-Liver	8170/3: Hepatocellular carcinoma, NOS	Unknown	8.6.3 Carcinoma of liver and intrahepatic bile ducts	VII(b) Hepatic carcinomas	Positive histology	I	T1	N0	M0	Blank(s)	Blank(s)	Blank(s)	Blank(s)	Blank(s)	Localized	0	None	None; diagnosed at autopsy	998	999	Blank(s)	Blank(s)	Blank(s)	Blank(s)	Blank(s)	Blank(s)	Blank(s)	Blank(s)	Blank(s)	Blank(s)	Blank(s)	Blank(s)	Blank(s)	988	0	98	Blank(s)	Liver	Dead (attributable to this cancer dx)	Alive or dead due to cancer	32
Blank(s)	Married (including common law)	70	1934	2004	September	Female	Other (American Indian/AK Native, Asian/Pacific Islander)	C22.1-Intrahepatic bile duct	8160/3: Cholangiocarcinoma	Unknown	8.6.3 Carcinoma of liver and intrahepatic bile ducts	VII(b) Hepatic carcinomas	Positive histology	IV	T4	NX	M1	Blank(s)	Blank(s)	Blank(s)	Blank(s)	Blank(s)	Distant	0	None	None; diagnosed at autopsy	20	999	Blank(s)	Blank(s)	Blank(s)	Blank(s)	Blank(s)	Blank(s)	Blank(s)	Blank(s)	Blank(s)	Blank(s)	Blank(s)	Blank(s)	Blank(s)	988	0	98	Blank(s)	State DC not available or state DC available but no COD	Dead (missing/unknown COD)	Dead (missing/unknown COD)	3
Insured	Married (including common law)	79	1933	2013	June	Female	White	C22.0-Liver	8000/3: Neoplasm, malignant	Unknown	10 Unspecified Malignant Neoplasms	VII(c) Unspecified malignant hepatic tumors	Positive histology	UNK Stage	TX	NX	MX	Blank(s)	Blank(s)	Blank(s)	Blank(s)	Blank(s)	Unknown/unstaged	0	None	None; diagnosed at autopsy	999	999	Blank(s)	Blank(s)	Blank(s)	Blank(s)	Blank(s)	Blank(s)	Blank(s)	Blank(s)	Blank(s)	Blank(s)	Blank(s)	Blank(s)	Blank(s)	988	99	99	Blank(s)	Liver	N/A not first tumor	N/A not first tumor	0
Blank(s)	Married (including common law)	80	1924	2004	October	Female	White	C22.0-Liver	8170/3: Hepatocellular carcinoma, NOS	Undifferentiated; anaplastic; Grade IV	8.6.3 Carcinoma of liver and intrahepatic bile ducts	VII(b) Hepatic carcinomas	Positive histology	I	T1	N0	M0	Blank(s)	Blank(s)	Blank(s)	Blank(s)	Blank(s)	Localized	0	None	None; diagnosed at autopsy	20	999	Blank(s)	Blank(s)	Blank(s)	Blank(s)	Blank(s)	Blank(s)	Blank(s)	Blank(s)	Blank(s)	Blank(s)	Blank(s)	Blank(s)	Blank(s)	988	0	98	Blank(s)	Liver	Dead (attributable to this cancer dx)	Alive or dead due to cancer	4
Any Medicaid	Single (never married)	63	1948	2011	February	Female	Black	C22.0-Liver	8180/3: Combined hepatocellular carcinoma and cholangiocarcinoma	Poorly differentiated; Grade III	8.6.3 Carcinoma of liver and intrahepatic bile ducts	VII(b) Hepatic carcinomas	Positive histology	I	T1	N0	M0	Blank(s)	Blank(s)	Blank(s)	Blank(s)	Blank(s)	Localized	23	None	None; diagnosed at autopsy	10	1	Blank(s)	Blank(s)	Blank(s)	Blank(s)	Blank(s)	Blank(s)	Blank(s)	Blank(s)	Blank(s)	Blank(s)	Blank(s)	Blank(s)	Blank(s)	988	0	98	Blank(s)	Liver	N/A not first tumor	N/A not first tumor	59
Blank(s)	Married (including common law)	57	1947	2004	October	Male	Other (American Indian/AK Native, Asian/Pacific Islander)	C22.0-Liver	8170/3: Hepatocellular carcinoma, NOS	Unknown	8.6.3 Carcinoma of liver and intrahepatic bile ducts	VII(b) Hepatic carcinomas	Positive histology	II	T2	N0	M0	Blank(s)	Blank(s)	Blank(s)	Blank(s)	Blank(s)	Regional	0	None	None; diagnosed at autopsy	10	0	Blank(s)	Blank(s)	Blank(s)	Blank(s)	Blank(s)	Blank(s)	Blank(s)	Blank(s)	Blank(s)	Blank(s)	Blank(s)	Blank(s)	Blank(s)	988	0	98	Blank(s)	Liver	Dead (attributable to this cancer dx)	Alive or dead due to cancer	7
Any Medicaid	Married (including common law)	81	1928	2010	April	Female	Other (American Indian/AK Native, Asian/Pacific Islander)	C22.0-Liver	8170/3: Hepatocellular carcinoma, NOS	Unknown	8.6.3 Carcinoma of liver and intrahepatic bile ducts	VII(b) Hepatic carcinomas	Radiography without microscopic confirm	IIIA	T3	N0	M0	Blank(s)	Blank(s)	Blank(s)	Blank(s)	Blank(s)	Regional	0	None	None; diagnosed at autopsy	10	999	Blank(s)	Blank(s)	Blank(s)	Blank(s)	Blank(s)	Blank(s)	Blank(s)	Blank(s)	Blank(s)	Blank(s)	Blank(s)	Blank(s)	Blank(s)	988	0	98	Blank(s)	Chronic Obstructive Pulmonary Disease and Allied Cond	N/A not first tumor	N/A not first tumor	2
Blank(s)	Married (including common law)	50	1953	2004	August	Male	White	C22.0-Liver	8190/3: Trabecular adenocarcinoma	Unknown	8.6.3 Carcinoma of liver and intrahepatic bile ducts	VII(b) Hepatic carcinomas	Positive histology	IIIC	T1	N1	M0	Blank(s)	Blank(s)	Blank(s)	Blank(s)	Blank(s)	Regional	61	4 or more regional lymph nodes removed	None; diagnosed at autopsy	999	999	Blank(s)	Blank(s)	Blank(s)	Blank(s)	Blank(s)	Blank(s)	Blank(s)	Blank(s)	Blank(s)	Blank(s)	Blank(s)	Blank(s)	Blank(s)	988	11	1	Blank(s)	Alive	Alive or dead of other cause	Alive or dead due to cancer	148
Blank(s)	Married (including common law)	55	1949	2004	November	Male	Other (American Indian/AK Native, Asian/Pacific Islander)	C22.0-Liver	8010/3: Carcinoma, NOS	Unknown	8.6.3 Carcinoma of liver and intrahepatic bile ducts	VII(b) Hepatic carcinomas	Radiography without microscopic confirm	IV	TX	N1	M1	Blank(s)	Blank(s)	Blank(s)	Blank(s)	Blank(s)	Distant	0	None	None; diagnosed at autopsy	998	999	Blank(s)	Blank(s)	Blank(s)	Blank(s)	Blank(s)	Blank(s)	Blank(s)	Blank(s)	Blank(s)	Blank(s)	Blank(s)	Blank(s)	Blank(s)	988	0	98	Blank(s)	Liver	Dead (attributable to this cancer dx)	Alive or dead due to cancer	1
Blank(s)	Married (including common law)	60	1944	2004	December	Male	Other (American Indian/AK Native, Asian/Pacific Islander)	C22.0-Liver	8170/3: Hepatocellular carcinoma, NOS	Unknown	8.6.3 Carcinoma of liver and intrahepatic bile ducts	VII(b) Hepatic carcinomas	Positive laboratory test/marker study	IV	T4	N0	M1	Blank(s)	Blank(s)	Blank(s)	Blank(s)	Blank(s)	Distant	0	None	None; diagnosed at autopsy	10	999	Blank(s)	Blank(s)	Blank(s)	Blank(s)	Blank(s)	Blank(s)	Blank(s)	Blank(s)	Blank(s)	Blank(s)	Blank(s)	Blank(s)	Blank(s)	988	0	98	Blank(s)	Miscellaneous Malignant Cancer	Dead (attributable to this cancer dx)	Alive or dead due to cancer	0
Any Medicaid	Single (never married)	59	1949	2009	December	Male	White	C22.0-Liver	8170/3: Hepatocellular carcinoma, NOS	Unknown	8.6.3 Carcinoma of liver and intrahepatic bile ducts	VII(b) Hepatic carcinomas	Positive histology	I	T1	N0	M0	Blank(s)	Blank(s)	Blank(s)	Blank(s)	Blank(s)	Localized	16	None	None; diagnosed at autopsy	20	1	Blank(s)	Blank(s)	Blank(s)	Blank(s)	Blank(s)	Blank(s)	Blank(s)	Blank(s)	Blank(s)	Blank(s)	Blank(s)	Blank(s)	Blank(s)	988	0	98	Blank(s)	Chronic Liver Disease and Cirrhosis	N/A not first tumor	N/A not first tumor	30
Blank(s)	Married (including common law)	63	1941	2004	November	Male	Other (American Indian/AK Native, Asian/Pacific Islander)	C22.0-Liver	8170/3: Hepatocellular carcinoma, NOS	Unknown	8.6.3 Carcinoma of liver and intrahepatic bile ducts	VII(b) Hepatic carcinomas	Radiography without microscopic confirm	IIIC	T3	N1	M0	Blank(s)	Blank(s)	Blank(s)	Blank(s)	Blank(s)	Regional	0	None	None; diagnosed at autopsy	10	999	Blank(s)	Blank(s)	Blank(s)	Blank(s)	Blank(s)	Blank(s)	Blank(s)	Blank(s)	Blank(s)	Blank(s)	Blank(s)	Blank(s)	Blank(s)	988	0	98	Blank(s)	Other Cause of Death	Alive or dead of other cause	Dead (attributable to causes other than this cancer dx)	1
Blank(s)	Married (including common law)	75	1929	2004	October	Male	Other (American Indian/AK Native, Asian/Pacific Islander)	C22.0-Liver	8170/3: Hepatocellular carcinoma, NOS	Unknown	8.6.3 Carcinoma of liver and intrahepatic bile ducts	VII(b) Hepatic carcinomas	Positive histology	II	T2	N0	M0	Blank(s)	Blank(s)	Blank(s)	Blank(s)	Blank(s)	Regional	21	None	None; diagnosed at autopsy	10	1	Blank(s)	Blank(s)	Blank(s)	Blank(s)	Blank(s)	Blank(s)	Blank(s)	Blank(s)	Blank(s)	Blank(s)	Blank(s)	Blank(s)	Blank(s)	988	0	98	Blank(s)	Liver	Dead (attributable to this cancer dx)	Alive or dead due to cancer	7
Blank(s)	Married (including common law)	60	1944	2004	November	Male	Other (American Indian/AK Native, Asian/Pacific Islander)	C22.0-Liver	8170/3: Hepatocellular carcinoma, NOS	Unknown	8.6.3 Carcinoma of liver and intrahepatic bile ducts	VII(b) Hepatic carcinomas	Positive histology	I	T1	N0	M0	Blank(s)	Blank(s)	Blank(s)	Blank(s)	Blank(s)	Localized	61	None	None; diagnosed at autopsy	20	1	Blank(s)	Blank(s)	Blank(s)	Blank(s)	Blank(s)	Blank(s)	Blank(s)	Blank(s)	Blank(s)	Blank(s)	Blank(s)	Blank(s)	Blank(s)	988	0	98	Blank(s)	Diseases of Heart	Alive or dead of other cause	Dead (attributable to causes other than this cancer dx)	137
Blank(s)	Married (including common law)	83	1921	2004	November	Male	Other (American Indian/AK Native, Asian/Pacific Islander)	C22.0-Liver	8170/3: Hepatocellular carcinoma, NOS	Unknown	8.6.3 Carcinoma of liver and intrahepatic bile ducts	VII(b) Hepatic carcinomas	Positive histology	IV	T1	NX	M1	Blank(s)	Blank(s)	Blank(s)	Blank(s)	Blank(s)	Distant	0	None	None; diagnosed at autopsy	10	999	Blank(s)	Blank(s)	Blank(s)	Blank(s)	Blank(s)	Blank(s)	Blank(s)	Blank(s)	Blank(s)	Blank(s)	Blank(s)	Blank(s)	Blank(s)	988	0	98	Blank(s)	Liver	Dead (attributable to this cancer dx)	Alive or dead due to cancer	19
Blank(s)	Married (including common law)	64	1940	2004	April	Male	Other (American Indian/AK Native, Asian/Pacific Islander)	C22.0-Liver	8170/3: Hepatocellular carcinoma, NOS	Moderately differentiated; Grade II	8.6.3 Carcinoma of liver and intrahepatic bile ducts	VII(b) Hepatic carcinomas	Positive histology	IIIC	T1	N1	M0	Blank(s)	Blank(s)	Blank(s)	Blank(s)	Blank(s)	Regional	61	None	None; diagnosed at autopsy	20	999	Blank(s)	Blank(s)	Blank(s)	Blank(s)	Blank(s)	Blank(s)	Blank(s)	Blank(s)	Blank(s)	Blank(s)	Blank(s)	Blank(s)	Blank(s)	988	0	98	Blank(s)	Alive	Alive or dead of other cause	Alive or dead due to cancer	152
Blank(s)	Married (including common law)	66	1938	2004	December	Male	Other (American Indian/AK Native, Asian/Pacific Islander)	C22.0-Liver	9120/3: Hemangiosarcoma	Poorly differentiated; Grade III	5.3.1.1 Specified (excluding Kaposi sarcoma)	IX(d) Other specified soft tissue sarcomas	Positive histology	NA	NA	NA	NA	Blank(s)	Blank(s)	Blank(s)	Blank(s)	Blank(s)	Regional	0	None	None; diagnosed at autopsy	20	999	Blank(s)	Blank(s)	Blank(s)	Blank(s)	Blank(s)	Blank(s)	Blank(s)	Blank(s)	Blank(s)	Blank(s)	Blank(s)	Blank(s)	Blank(s)	988	0	98	Blank(s)	Liver	Dead (attributable to this cancer dx)	Alive or dead due to cancer	2
Blank(s)	Married (including common law)	85	1919	2004	June	Male	Other (American Indian/AK Native, Asian/Pacific Islander)	C22.0-Liver	8170/3: Hepatocellular carcinoma, NOS	Unknown	8.6.3 Carcinoma of liver and intrahepatic bile ducts	VII(b) Hepatic carcinomas	Positive laboratory test/marker study	IIIA	T3	N0	M0	Blank(s)	Blank(s)	Blank(s)	Blank(s)	Blank(s)	Regional	0	None	None; diagnosed at autopsy	10	999	Blank(s)	Blank(s)	Blank(s)	Blank(s)	Blank(s)	Blank(s)	Blank(s)	Blank(s)	Blank(s)	Blank(s)	Blank(s)	Blank(s)	Blank(s)	988	0	98	Blank(s)	Alive	Alive or dead of other cause	Alive or dead due to cancer	32
Blank(s)	Single (never married)	57	1947	2004	September	Male	White	C22.0-Liver	8170/3: Hepatocellular carcinoma, NOS	Unknown	8.6.3 Carcinoma of liver and intrahepatic bile ducts	VII(b) Hepatic carcinomas	Positive histology	II	T2	N0	M0	Blank(s)	Blank(s)	Blank(s)	Blank(s)	Blank(s)	Regional	61	None	None; diagnosed at autopsy	999	999	Blank(s)	Blank(s)	Blank(s)	Blank(s)	Blank(s)	Blank(s)	Blank(s)	Blank(s)	Blank(s)	Blank(s)	Blank(s)	Blank(s)	Blank(s)	988	0	98	Blank(s)	Alive	Alive or dead of other cause	Alive or dead due to cancer	147
Blank(s)	Single (never married)	74	1930	2004	December	Male	White	C22.0-Liver	8170/3: Hepatocellular carcinoma, NOS	Unknown	8.6.3 Carcinoma of liver and intrahepatic bile ducts	VII(b) Hepatic carcinomas	Radiography without microscopic confirm	I	T1	N0	M0	Blank(s)	Blank(s)	Blank(s)	Blank(s)	Blank(s)	Localized	0	None	None; diagnosed at autopsy	10	1	Blank(s)	Blank(s)	Blank(s)	Blank(s)	Blank(s)	Blank(s)	Blank(s)	Blank(s)	Blank(s)	Blank(s)	Blank(s)	Blank(s)	Blank(s)	988	98	0	Blank(s)	Other Cause of Death	Alive or dead of other cause	Dead (attributable to causes other than this cancer dx)	1
Blank(s)	Widowed	87	1917	2004	April	Female	Black	C22.0-Liver	8170/3: Hepatocellular carcinoma, NOS	Moderately differentiated; Grade II	8.6.3 Carcinoma of liver and intrahepatic bile ducts	VII(b) Hepatic carcinomas	Positive histology	UNK Stage	TX	N0	M0	Blank(s)	Blank(s)	Blank(s)	Blank(s)	Blank(s)	Unknown/unstaged	0	None	None; diagnosed at autopsy	10	999	Blank(s)	Blank(s)	Blank(s)	Blank(s)	Blank(s)	Blank(s)	Blank(s)	Blank(s)	Blank(s)	Blank(s)	Blank(s)	Blank(s)	Blank(s)	988	0	98	Blank(s)	Liver	Dead (attributable to this cancer dx)	Alive or dead due to cancer	7
Blank(s)	Married (including common law)	63	1941	2004	February	Male	Other (American Indian/AK Native, Asian/Pacific Islander)	C22.0-Liver	8170/3: Hepatocellular carcinoma, NOS	Unknown	8.6.3 Carcinoma of liver and intrahepatic bile ducts	VII(b) Hepatic carcinomas	Radiography without microscopic confirm	UNK Stage	T1	NX	M0	Blank(s)	Blank(s)	Blank(s)	Blank(s)	Blank(s)	Localized	0	None	None; diagnosed at autopsy	10	0	Blank(s)	Blank(s)	Blank(s)	Blank(s)	Blank(s)	Blank(s)	Blank(s)	Blank(s)	Blank(s)	Blank(s)	Blank(s)	Blank(s)	Blank(s)	988	0	98	Blank(s)	Miscellaneous Malignant Cancer	Dead (attributable to this cancer dx)	Alive or dead due to cancer	4
Blank(s)	Divorced	50	1954	2004	October	Male	White	C22.0-Liver	8170/3: Hepatocellular carcinoma, NOS	Moderately differentiated; Grade II	8.6.3 Carcinoma of liver and intrahepatic bile ducts	VII(b) Hepatic carcinomas	Positive histology	II	T2	N0	M0	Blank(s)	Blank(s)	Blank(s)	Blank(s)	Blank(s)	Localized	21	None	None; diagnosed at autopsy	10	999	Blank(s)	Blank(s)	Blank(s)	Blank(s)	Blank(s)	Blank(s)	Blank(s)	Blank(s)	Blank(s)	Blank(s)	Blank(s)	Blank(s)	Blank(s)	988	0	98	Blank(s)	Liver	Dead (attributable to this cancer dx)	Alive or dead due to cancer	21
Blank(s)	Married (including common law)	69	1935	2004	May	Male	Other (American Indian/AK Native, Asian/Pacific Islander)	C22.0-Liver	8170/3: Hepatocellular carcinoma, NOS	Moderately differentiated; Grade II	8.6.3 Carcinoma of liver and intrahepatic bile ducts	VII(b) Hepatic carcinomas	Positive histology	II	T2	N0	M0	Blank(s)	Blank(s)	Blank(s)	Blank(s)	Blank(s)	Localized	36	None	None; diagnosed at autopsy	999	0	Blank(s)	Blank(s)	Blank(s)	Blank(s)	Blank(s)	Blank(s)	Blank(s)	Blank(s)	Blank(s)	Blank(s)	Blank(s)	Blank(s)	Blank(s)	988	0	98	Blank(s)	State DC not available or state DC available but no COD	Dead (missing/unknown COD)	Dead (missing/unknown COD)	86
Blank(s)	Married (including common law)	76	1928	2004	December	Female	Other (American Indian/AK Native, Asian/Pacific Islander)	C22.0-Liver	8170/3: Hepatocellular carcinoma, NOS	Moderately differentiated; Grade II	8.6.3 Carcinoma of liver and intrahepatic bile ducts	VII(b) Hepatic carcinomas	Positive histology	I	T1	N0	M0	Blank(s)	Blank(s)	Blank(s)	Blank(s)	Blank(s)	Localized	0	None	None; diagnosed at autopsy	10	1	Blank(s)	Blank(s)	Blank(s)	Blank(s)	Blank(s)	Blank(s)	Blank(s)	Blank(s)	Blank(s)	Blank(s)	Blank(s)	Blank(s)	Blank(s)	988	0	98	Blank(s)	Liver	Dead (attributable to this cancer dx)	Alive or dead due to cancer	15
Blank(s)	Married (including common law)	91	1913	2004	December	Male	Other (American Indian/AK Native, Asian/Pacific Islander)	C22.0-Liver	8170/3: Hepatocellular carcinoma, NOS	Unknown	8.6.3 Carcinoma of liver and intrahepatic bile ducts	VII(b) Hepatic carcinomas	Positive exfoliative cytology, no positive histology	UNK Stage	TX	N0	M0	Blank(s)	Blank(s)	Blank(s)	Blank(s)	Blank(s)	Regional	0	None	None; diagnosed at autopsy	10	999	Blank(s)	Blank(s)	Blank(s)	Blank(s)	Blank(s)	Blank(s)	Blank(s)	Blank(s)	Blank(s)	Blank(s)	Blank(s)	Blank(s)	Blank(s)	988	0	98	Blank(s)	Miscellaneous Malignant Cancer	Dead (attributable to this cancer dx)	Alive or dead due to cancer	25
Blank(s)	Married (including common law)	87	1917	2004	December	Male	Other (American Indian/AK Native, Asian/Pacific Islander)	C22.0-Liver	8170/3: Hepatocellular carcinoma, NOS	Poorly differentiated; Grade III	8.6.3 Carcinoma of liver and intrahepatic bile ducts	VII(b) Hepatic carcinomas	Positive histology	UNK Stage	T3	NX	MX	Blank(s)	Blank(s)	Blank(s)	Blank(s)	Blank(s)	Regional	37	None	None; diagnosed at autopsy	999	1	Blank(s)	Blank(s)	Blank(s)	Blank(s)	Blank(s)	Blank(s)	Blank(s)	Blank(s)	Blank(s)	Blank(s)	Blank(s)	Blank(s)	Blank(s)	988	0	98	Blank(s)	Liver	Dead (attributable to this cancer dx)	Alive or dead due to cancer	1
Blank(s)	Widowed	72	1932	2004	October	Male	White	C22.1-Intrahepatic bile duct	8160/3: Cholangiocarcinoma	Undifferentiated; anaplastic; Grade IV	8.6.3 Carcinoma of liver and intrahepatic bile ducts	VII(b) Hepatic carcinomas	Positive histology	IV	T4	NX	M1	Blank(s)	Blank(s)	Blank(s)	Blank(s)	Blank(s)	Distant	60	None	None; diagnosed at autopsy	999	999	Blank(s)	Blank(s)	Blank(s)	Blank(s)	Blank(s)	Blank(s)	Blank(s)	Blank(s)	Blank(s)	Blank(s)	Blank(s)	Blank(s)	Blank(s)	988	0	98	Blank(s)	Miscellaneous Malignant Cancer	Dead (attributable to this cancer dx)	Alive or dead due to cancer	0
Blank(s)	Divorced	55	1949	2004	December	Male	Black	C22.0-Liver	8170/3: Hepatocellular carcinoma, NOS	Unknown	8.6.3 Carcinoma of liver and intrahepatic bile ducts	VII(b) Hepatic carcinomas	Positive histology	IV	T1	N0	M1	Blank(s)	Blank(s)	Blank(s)	Blank(s)	Blank(s)	Distant	0	None	None; diagnosed at autopsy	999	999	Blank(s)	Blank(s)	Blank(s)	Blank(s)	Blank(s)	Blank(s)	Blank(s)	Blank(s)	Blank(s)	Blank(s)	Blank(s)	Blank(s)	Blank(s)	988	0	98	Blank(s)	Other Cause of Death	Alive or dead of other cause	Dead (attributable to causes other than this cancer dx)	0
Blank(s)	Unknown	39	1964	2004	February	Male	White	C22.0-Liver	8170/3: Hepatocellular carcinoma, NOS	Poorly differentiated; Grade III	8.6.3 Carcinoma of liver and intrahepatic bile ducts	VII(b) Hepatic carcinomas	Positive histology	UNK Stage	TX	N0	M0	Blank(s)	Blank(s)	Blank(s)	Blank(s)	Blank(s)	Regional	21	None	None; diagnosed at autopsy	20	0	Blank(s)	Blank(s)	Blank(s)	Blank(s)	Blank(s)	Blank(s)	Blank(s)	Blank(s)	Blank(s)	Blank(s)	Blank(s)	Blank(s)	Blank(s)	988	0	98	Blank(s)	Alive	Alive or dead of other cause	Alive or dead due to cancer	0
Blank(s)	Married (including common law)	39	1965	2004	October	Male	Other (American Indian/AK Native, Asian/Pacific Islander)	C22.0-Liver	8170/3: Hepatocellular carcinoma, NOS	Unknown	8.6.3 Carcinoma of liver and intrahepatic bile ducts	VII(b) Hepatic carcinomas	Radiography without microscopic confirm	UNK Stage	T3	NX	MX	Blank(s)	Blank(s)	Blank(s)	Blank(s)	Blank(s)	Regional	0	None	None; diagnosed at autopsy	10	999	Blank(s)	Blank(s)	Blank(s)	Blank(s)	Blank(s)	Blank(s)	Blank(s)	Blank(s)	Blank(s)	Blank(s)	Blank(s)	Blank(s)	Blank(s)	988	0	98	Blank(s)	Liver	Dead (attributable to this cancer dx)	Alive or dead due to cancer	3
Blank(s)	Divorced	71	1932	2004	June	Male	White	C22.0-Liver	8170/3: Hepatocellular carcinoma, NOS	Unknown	8.6.3 Carcinoma of liver and intrahepatic bile ducts	VII(b) Hepatic carcinomas	Positive exfoliative cytology, no positive histology	II	T2	N0	M0	Blank(s)	Blank(s)	Blank(s)	Blank(s)	Blank(s)	Regional	16	None	None; diagnosed at autopsy	10	999	Blank(s)	Blank(s)	Blank(s)	Blank(s)	Blank(s)	Blank(s)	Blank(s)	Blank(s)	Blank(s)	Blank(s)	Blank(s)	Blank(s)	Blank(s)	988	0	98	Blank(s)	Diseases of Heart	Alive or dead of other cause	Dead (attributable to causes other than this cancer dx)	35
Blank(s)	Single (never married)	47	1959	2006	June	Male	White	C22.0-Liver	8170/3: Hepatocellular carcinoma, NOS	Unknown	8.6.3 Carcinoma of liver and intrahepatic bile ducts	VII(b) Hepatic carcinomas	Radiography without microscopic confirm	I	T1	N0	M0	Blank(s)	Blank(s)	Blank(s)	Blank(s)	Blank(s)	Localized	0	None	None; diagnosed at autopsy	10	1	Blank(s)	Blank(s)	Blank(s)	Blank(s)	Blank(s)	Blank(s)	Blank(s)	Blank(s)	Blank(s)	Blank(s)	Blank(s)	Blank(s)	Blank(s)	988	0	98	Blank(s)	Liver	N/A not first tumor	N/A not first tumor	9
Blank(s)	Divorced	75	1928	2004	August	Female	White	C22.0-Liver	8170/3: Hepatocellular carcinoma, NOS	Unknown	8.6.3 Carcinoma of liver and intrahepatic bile ducts	VII(b) Hepatic carcinomas	Positive histology	IIIC	T1	N1	M0	Blank(s)	Blank(s)	Blank(s)	Blank(s)	Blank(s)	Regional	0	None	None; diagnosed at autopsy	10	999	Blank(s)	Blank(s)	Blank(s)	Blank(s)	Blank(s)	Blank(s)	Blank(s)	Blank(s)	Blank(s)	Blank(s)	Blank(s)	Blank(s)	Blank(s)	988	1	1	Blank(s)	Liver	Dead (attributable to this cancer dx)	Alive or dead due to cancer	13
Blank(s)	Married (including common law)	73	1930	2004	June	Male	Other (American Indian/AK Native, Asian/Pacific Islander)	C22.0-Liver	8170/3: Hepatocellular carcinoma, NOS	Unknown	8.6.3 Carcinoma of liver and intrahepatic bile ducts	VII(b) Hepatic carcinomas	Radiography without microscopic confirm	UNK Stage	T2	NX	MX	Blank(s)	Blank(s)	Blank(s)	Blank(s)	Blank(s)	Localized	0	Unknown or not applicable	None; diagnosed at autopsy	10	999	Blank(s)	Blank(s)	Blank(s)	Blank(s)	Blank(s)	Blank(s)	Blank(s)	Blank(s)	Blank(s)	Blank(s)	Blank(s)	Blank(s)	Blank(s)	988	99	99	Blank(s)	Other Infectious and Parasitic Diseases including HIV	Alive or dead of other cause	Dead (attributable to causes other than this cancer dx)	3
Blank(s)	Married (including common law)	65	1939	2004	November	Male	Other (American Indian/AK Native, Asian/Pacific Islander)	C22.0-Liver	8170/3: Hepatocellular carcinoma, NOS	Well differentiated; Grade I	8.6.3 Carcinoma of liver and intrahepatic bile ducts	VII(b) Hepatic carcinomas	Positive histology	I	T1	N0	M0	Blank(s)	Blank(s)	Blank(s)	Blank(s)	Blank(s)	Localized	0	None	None; diagnosed at autopsy	20	999	Blank(s)	Blank(s)	Blank(s)	Blank(s)	Blank(s)	Blank(s)	Blank(s)	Blank(s)	Blank(s)	Blank(s)	Blank(s)	Blank(s)	Blank(s)	988	0	98	Blank(s)	Liver	Dead (attributable to this cancer dx)	Alive or dead due to cancer	0
Blank(s)	Married (including common law)	63	1940	2004	October	Male	Other (American Indian/AK Native, Asian/Pacific Islander)	C22.0-Liver	8170/3: Hepatocellular carcinoma, NOS	Moderately differentiated; Grade II	8.6.3 Carcinoma of liver and intrahepatic bile ducts	VII(b) Hepatic carcinomas	Positive histology	I	T1	N0	M0	Blank(s)	Blank(s)	Blank(s)	Blank(s)	Blank(s)	Localized	16	None	None; diagnosed at autopsy	20	999	Blank(s)	Blank(s)	Blank(s)	Blank(s)	Blank(s)	Blank(s)	Blank(s)	Blank(s)	Blank(s)	Blank(s)	Blank(s)	Blank(s)	Blank(s)	988	0	98	Blank(s)	Alive	Alive or dead of other cause	Alive or dead due to cancer	146
Blank(s)	Separated	53	1951	2004	October	Male	Other (American Indian/AK Native, Asian/Pacific Islander)	C22.0-Liver	8170/3: Hepatocellular carcinoma, NOS	Well differentiated; Grade I	8.6.3 Carcinoma of liver and intrahepatic bile ducts	VII(b) Hepatic carcinomas	Positive histology	I	T1	N0	M0	Blank(s)	Blank(s)	Blank(s)	Blank(s)	Blank(s)	Localized	16	None	None; diagnosed at autopsy	10	1	Blank(s)	Blank(s)	Blank(s)	Blank(s)	Blank(s)	Blank(s)	Blank(s)	Blank(s)	Blank(s)	Blank(s)	Blank(s)	Blank(s)	Blank(s)	988	0	98	Blank(s)	State DC not available or state DC available but no COD	Dead (missing/unknown COD)	Dead (missing/unknown COD)	12
Blank(s)	Single (never married)	58	1946	2004	September	Male	White	C22.0-Liver	8190/3: Trabecular adenocarcinoma	Moderately differentiated; Grade II	8.6.3 Carcinoma of liver and intrahepatic bile ducts	VII(b) Hepatic carcinomas	Positive histology	I	T1	N0	M0	Blank(s)	Blank(s)	Blank(s)	Blank(s)	Blank(s)	Localized	24	None	None; diagnosed at autopsy	20	0	Blank(s)	Blank(s)	Blank(s)	Blank(s)	Blank(s)	Blank(s)	Blank(s)	Blank(s)	Blank(s)	Blank(s)	Blank(s)	Blank(s)	Blank(s)	988	0	98	Blank(s)	Alive	Alive or dead of other cause	Alive or dead due to cancer	147
Blank(s)	Single (never married)	52	1952	2004	June	Male	White	C22.0-Liver	8170/3: Hepatocellular carcinoma, NOS	Unknown	8.6.3 Carcinoma of liver and intrahepatic bile ducts	VII(b) Hepatic carcinomas	Positive exfoliative cytology, no positive histology	IV	T2	NX	M1	Blank(s)	Blank(s)	Blank(s)	Blank(s)	Blank(s)	Distant	0	None	None; diagnosed at autopsy	10	999	Blank(s)	Blank(s)	Blank(s)	Blank(s)	Blank(s)	Blank(s)	Blank(s)	Blank(s)	Blank(s)	Blank(s)	Blank(s)	Blank(s)	Blank(s)	988	0	98	Blank(s)	Miscellaneous Malignant Cancer	Dead (attributable to this cancer dx)	Alive or dead due to cancer	1
Blank(s)	Single (never married)	56	1947	2004	July	Female	Black	C22.0-Liver	8170/3: Hepatocellular carcinoma, NOS	Well differentiated; Grade I	8.6.3 Carcinoma of liver and intrahepatic bile ducts	VII(b) Hepatic carcinomas	Positive histology	I	T1	N0	M0	Blank(s)	Blank(s)	Blank(s)	Blank(s)	Blank(s)	Localized	61	None	None; diagnosed at autopsy	20	999	Blank(s)	Blank(s)	Blank(s)	Blank(s)	Blank(s)	Blank(s)	Blank(s)	Blank(s)	Blank(s)	Blank(s)	Blank(s)	Blank(s)	Blank(s)	988	0	98	Blank(s)	State DC not available or state DC available but no COD	Dead (missing/unknown COD)	Dead (missing/unknown COD)	13
Blank(s)	Single (never married)	69	1935	2004	July	Male	Black	C22.0-Liver	8170/3: Hepatocellular carcinoma, NOS	Unknown	8.6.3 Carcinoma of liver and intrahepatic bile ducts	VII(b) Hepatic carcinomas	Radiography without microscopic confirm	IIIC	T3	N1	M0	Blank(s)	Blank(s)	Blank(s)	Blank(s)	Blank(s)	Regional	0	None	None; diagnosed at autopsy	10	999	Blank(s)	Blank(s)	Blank(s)	Blank(s)	Blank(s)	Blank(s)	Blank(s)	Blank(s)	Blank(s)	Blank(s)	Blank(s)	Blank(s)	Blank(s)	988	0	98	Blank(s)	Miscellaneous Malignant Cancer	Dead (attributable to this cancer dx)	Alive or dead due to cancer	53
Blank(s)	Divorced	71	1933	2004	October	Female	Other (American Indian/AK Native, Asian/Pacific Islander)	C22.0-Liver	8170/3: Hepatocellular carcinoma, NOS	Unknown	8.6.3 Carcinoma of liver and intrahepatic bile ducts	VII(b) Hepatic carcinomas	Positive histology	I	T1	N0	M0	Blank(s)	Blank(s)	Blank(s)	Blank(s)	Blank(s)	Localized	16	None	None; diagnosed at autopsy	10	999	Blank(s)	Blank(s)	Blank(s)	Blank(s)	Blank(s)	Blank(s)	Blank(s)	Blank(s)	Blank(s)	Blank(s)	Blank(s)	Blank(s)	Blank(s)	988	0	98	Blank(s)	Liver	Dead (attributable to this cancer dx)	Alive or dead due to cancer	9
Blank(s)	Married (including common law)	54	1950	2004	April	Male	Other (American Indian/AK Native, Asian/Pacific Islander)	C22.0-Liver	8170/3: Hepatocellular carcinoma, NOS	Unknown	8.6.3 Carcinoma of liver and intrahepatic bile ducts	VII(b) Hepatic carcinomas	Radiography without microscopic confirm	IIIB	T4	N0	M0	Blank(s)	Blank(s)	Blank(s)	Blank(s)	Blank(s)	Regional	0	None	None; diagnosed at autopsy	10	999	Blank(s)	Blank(s)	Blank(s)	Blank(s)	Blank(s)	Blank(s)	Blank(s)	Blank(s)	Blank(s)	Blank(s)	Blank(s)	Blank(s)	Blank(s)	988	0	98	Blank(s)	Liver	Dead (attributable to this cancer dx)	Alive or dead due to cancer	27
Blank(s)	Married (including common law)	63	1941	2004	December	Female	Black	C22.0-Liver	8170/3: Hepatocellular carcinoma, NOS	Unknown	8.6.3 Carcinoma of liver and intrahepatic bile ducts	VII(b) Hepatic carcinomas	Positive laboratory test/marker study	IV	T1	N0	M1	Blank(s)	Blank(s)	Blank(s)	Blank(s)	Blank(s)	Distant	0	None	None; diagnosed at autopsy	10	999	Blank(s)	Blank(s)	Blank(s)	Blank(s)	Blank(s)	Blank(s)	Blank(s)	Blank(s)	Blank(s)	Blank(s)	Blank(s)	Blank(s)	Blank(s)	988	0	98	Blank(s)	Liver	Dead (attributable to this cancer dx)	Alive or dead due to cancer	18
Insured	Married (including common law)	78	1929	2007	October	Male	Black	C22.0-Liver	8170/3: Hepatocellular carcinoma, NOS	Moderately differentiated; Grade II	8.6.3 Carcinoma of liver and intrahepatic bile ducts	VII(b) Hepatic carcinomas	Positive histology	II	T2	N0	M0	Blank(s)	Blank(s)	Blank(s)	Blank(s)	Blank(s)	Regional	0	None	None; diagnosed at autopsy	998	999	Blank(s)	Blank(s)	Blank(s)	Blank(s)	Blank(s)	Blank(s)	Blank(s)	Blank(s)	Blank(s)	Blank(s)	Blank(s)	Blank(s)	Blank(s)	988	0	98	Blank(s)	Diseases of Heart	N/A not first tumor	N/A not first tumor	1
Blank(s)	Divorced	51	1954	2006	September	Male	Black	C22.0-Liver	8170/3: Hepatocellular carcinoma, NOS	Well differentiated; Grade I	8.6.3 Carcinoma of liver and intrahepatic bile ducts	VII(b) Hepatic carcinomas	Positive histology	UNK Stage	TX	N0	M0	Blank(s)	Blank(s)	Blank(s)	Blank(s)	Blank(s)	Regional	14	None	None; diagnosed at autopsy	20	999	Blank(s)	Blank(s)	Blank(s)	Blank(s)	Blank(s)	Blank(s)	Blank(s)	Blank(s)	Blank(s)	Blank(s)	Blank(s)	Blank(s)	Blank(s)	988	0	98	Blank(s)	Liver	N/A not first tumor	N/A not first tumor	39
Blank(s)	Married (including common law)	40	1964	2004	December	Female	Other (American Indian/AK Native, Asian/Pacific Islander)	C22.0-Liver	8170/3: Hepatocellular carcinoma, NOS	Moderately differentiated; Grade II	8.6.3 Carcinoma of liver and intrahepatic bile ducts	VII(b) Hepatic carcinomas	Positive histology	I	T1	N0	M0	Blank(s)	Blank(s)	Blank(s)	Blank(s)	Blank(s)	Localized	36	None	None; diagnosed at autopsy	20	999	Blank(s)	Blank(s)	Blank(s)	Blank(s)	Blank(s)	Blank(s)	Blank(s)	Blank(s)	Blank(s)	Blank(s)	Blank(s)	Blank(s)	Blank(s)	988	0	98	Blank(s)	Alive	Alive or dead of other cause	Alive or dead due to cancer	144
Blank(s)	Married (including common law)	44	1960	2004	October	Male	Other (American Indian/AK Native, Asian/Pacific Islander)	C22.0-Liver	8170/3: Hepatocellular carcinoma, NOS	Unknown	8.6.3 Carcinoma of liver and intrahepatic bile ducts	VII(b) Hepatic carcinomas	Positive histology	I	T1	N0	M0	Blank(s)	Blank(s)	Blank(s)	Blank(s)	Blank(s)	Localized	23	None	None; diagnosed at autopsy	20	0	Blank(s)	Blank(s)	Blank(s)	Blank(s)	Blank(s)	Blank(s)	Blank(s)	Blank(s)	Blank(s)	Blank(s)	Blank(s)	Blank(s)	Blank(s)	988	0	98	Blank(s)	Alive	Alive or dead of other cause	Alive or dead due to cancer	146
Blank(s)	Married (including common law)	67	1936	2004	January	Male	White	C22.0-Liver	8170/3: Hepatocellular carcinoma, NOS	Unknown	8.6.3 Carcinoma of liver and intrahepatic bile ducts	VII(b) Hepatic carcinomas	Positive histology	I	T1	N0	M0	Blank(s)	Blank(s)	Blank(s)	Blank(s)	Blank(s)	Localized	0	None	None; diagnosed at autopsy	10	999	Blank(s)	Blank(s)	Blank(s)	Blank(s)	Blank(s)	Blank(s)	Blank(s)	Blank(s)	Blank(s)	Blank(s)	Blank(s)	Blank(s)	Blank(s)	988	0	98	Blank(s)	Liver	Dead (attributable to this cancer dx)	Alive or dead due to cancer	1
Blank(s)	Divorced	56	1948	2004	September	Male	White	C22.0-Liver	8170/3: Hepatocellular carcinoma, NOS	Moderately differentiated; Grade II	8.6.3 Carcinoma of liver and intrahepatic bile ducts	VII(b) Hepatic carcinomas	Positive histology	I	T1	N0	M0	Blank(s)	Blank(s)	Blank(s)	Blank(s)	Blank(s)	Localized	36	None	None; diagnosed at autopsy	20	999	Blank(s)	Blank(s)	Blank(s)	Blank(s)	Blank(s)	Blank(s)	Blank(s)	Blank(s)	Blank(s)	Blank(s)	Blank(s)	Blank(s)	Blank(s)	988	0	98	Blank(s)	Alive	Alive or dead of other cause	Alive or dead due to cancer	147
Insured	Married (including common law)	63	1950	2014	July	Female	White	C22.0-Liver	8170/3: Hepatocellular carcinoma, NOS	Moderately differentiated; Grade II	8.6.3 Carcinoma of liver and intrahepatic bile ducts	VII(b) Hepatic carcinomas	Positive histology	UNK Stage	T1	NX	M0	Blank(s)	Blank(s)	Blank(s)	Blank(s)	Blank(s)	Localized	20	None	None; diagnosed at autopsy	999	999	Blank(s)	Blank(s)	Blank(s)	Blank(s)	Blank(s)	Blank(s)	Blank(s)	Blank(s)	Blank(s)	Blank(s)	Blank(s)	Blank(s)	Blank(s)	988	99	99	Blank(s)	Alive	N/A not first tumor	N/A not first tumor	29
Blank(s)	Separated	66	1938	2004	October	Male	Other (American Indian/AK Native, Asian/Pacific Islander)	C22.0-Liver	8170/3: Hepatocellular carcinoma, NOS	Unknown	8.6.3 Carcinoma of liver and intrahepatic bile ducts	VII(b) Hepatic carcinomas	Positive laboratory test/marker study	UNK Stage	TX	NX	M0	Blank(s)	Blank(s)	Blank(s)	Blank(s)	Blank(s)	Unknown/unstaged	0	None	None; diagnosed at autopsy	10	999	Blank(s)	Blank(s)	Blank(s)	Blank(s)	Blank(s)	Blank(s)	Blank(s)	Blank(s)	Blank(s)	Blank(s)	Blank(s)	Blank(s)	Blank(s)	988	0	98	Blank(s)	Liver	Dead (attributable to this cancer dx)	Alive or dead due to cancer	0
Blank(s)	Married (including common law)	77	1926	2004	June	Male	Other (American Indian/AK Native, Asian/Pacific Islander)	C22.0-Liver	8170/3: Hepatocellular carcinoma, NOS	Unknown	8.6.3 Carcinoma of liver and intrahepatic bile ducts	VII(b) Hepatic carcinomas	Radiography without microscopic confirm	UNK Stage	T2	NX	MX	Blank(s)	Blank(s)	Blank(s)	Blank(s)	Blank(s)	Regional	0	Unknown or not applicable	None; diagnosed at autopsy	10	999	Blank(s)	Blank(s)	Blank(s)	Blank(s)	Blank(s)	Blank(s)	Blank(s)	Blank(s)	Blank(s)	Blank(s)	Blank(s)	Blank(s)	Blank(s)	988	99	99	Blank(s)	Intrahepatic Bile Duct	Dead (attributable to this cancer dx)	Alive or dead due to cancer	2
Blank(s)	Married (including common law)	79	1924	2004	October	Female	Black	C22.0-Liver	8170/3: Hepatocellular carcinoma, NOS	Unknown	8.6.3 Carcinoma of liver and intrahepatic bile ducts	VII(b) Hepatic carcinomas	Positive exfoliative cytology, no positive histology	IV	TX	N0	M1	Blank(s)	Blank(s)	Blank(s)	Blank(s)	Blank(s)	Distant	0	None	None; diagnosed at autopsy	20	999	Blank(s)	Blank(s)	Blank(s)	Blank(s)	Blank(s)	Blank(s)	Blank(s)	Blank(s)	Blank(s)	Blank(s)	Blank(s)	Blank(s)	Blank(s)	988	0	98	Blank(s)	Liver	Dead (attributable to this cancer dx)	Alive or dead due to cancer	0
Blank(s)	Single (never married)	62	1941	2004	May	Male	White	C22.0-Liver	8170/3: Hepatocellular carcinoma, NOS	Unknown	8.6.3 Carcinoma of liver and intrahepatic bile ducts	VII(b) Hepatic carcinomas	Positive histology	II	T2	N0	M0	Blank(s)	Blank(s)	Blank(s)	Blank(s)	Blank(s)	Localized	0	None	None; diagnosed at autopsy	20	999	Blank(s)	Blank(s)	Blank(s)	Blank(s)	Blank(s)	Blank(s)	Blank(s)	Blank(s)	Blank(s)	Blank(s)	Blank(s)	Blank(s)	Blank(s)	988	0	98	Blank(s)	Alive	Alive or dead of other cause	Alive or dead due to cancer	151
Blank(s)	Widowed	54	1950	2005	March	Female	Black	C22.0-Liver	8170/3: Hepatocellular carcinoma, NOS	Unknown	8.6.3 Carcinoma of liver and intrahepatic bile ducts	VII(b) Hepatic carcinomas	Positive exfoliative cytology, no positive histology	IV	T4	NX	M1	Blank(s)	Blank(s)	Blank(s)	Blank(s)	Blank(s)	Distant	0	None	None; diagnosed at autopsy	999	999	Blank(s)	Blank(s)	Blank(s)	Blank(s)	Blank(s)	Blank(s)	Blank(s)	Blank(s)	Blank(s)	Blank(s)	Blank(s)	Blank(s)	Blank(s)	988	0	98	Blank(s)	Liver	Dead (attributable to this cancer dx)	Alive or dead due to cancer	4
Blank(s)	Married (including common law)	70	1934	2004	December	Female	Other (American Indian/AK Native, Asian/Pacific Islander)	C22.0-Liver	8170/3: Hepatocellular carcinoma, NOS	Unknown	8.6.3 Carcinoma of liver and intrahepatic bile ducts	VII(b) Hepatic carcinomas	Radiography without microscopic confirm	I	T1	N0	M0	Blank(s)	Blank(s)	Blank(s)	Blank(s)	Blank(s)	Localized	16	None	None; diagnosed at autopsy	10	999	Blank(s)	Blank(s)	Blank(s)	Blank(s)	Blank(s)	Blank(s)	Blank(s)	Blank(s)	Blank(s)	Blank(s)	Blank(s)	Blank(s)	Blank(s)	988	0	98	Blank(s)	Chronic Liver Disease and Cirrhosis	Dead (attributable to this cancer dx)	Alive or dead due to cancer	143
Blank(s)	Married (including common law)	61	1942	2004	July	Female	Other (American Indian/AK Native, Asian/Pacific Islander)	C22.0-Liver	8170/3: Hepatocellular carcinoma, NOS	Poorly differentiated; Grade III	8.6.3 Carcinoma of liver and intrahepatic bile ducts	VII(b) Hepatic carcinomas	Positive histology	I	T1	N0	M0	Blank(s)	Blank(s)	Blank(s)	Blank(s)	Blank(s)	Localized	61	1 to 3 regional lymph nodes removed	None; diagnosed at autopsy	10	999	Blank(s)	Blank(s)	Blank(s)	Blank(s)	Blank(s)	Blank(s)	Blank(s)	Blank(s)	Blank(s)	Blank(s)	Blank(s)	Blank(s)	Blank(s)	988	3	0	Blank(s)	Liver	Dead (attributable to this cancer dx)	Alive or dead due to cancer	48
Blank(s)	Married (including common law)	55	1949	2004	November	Male	White	C22.0-Liver	8170/3: Hepatocellular carcinoma, NOS	Moderately differentiated; Grade II	8.6.3 Carcinoma of liver and intrahepatic bile ducts	VII(b) Hepatic carcinomas	Positive histology	I	T1	N0	M0	Blank(s)	Blank(s)	Blank(s)	Blank(s)	Blank(s)	Localized	61	None	None; diagnosed at autopsy	30	999	Blank(s)	Blank(s)	Blank(s)	Blank(s)	Blank(s)	Blank(s)	Blank(s)	Blank(s)	Blank(s)	Blank(s)	Blank(s)	Blank(s)	Blank(s)	988	0	98	Blank(s)	Alive	Alive or dead of other cause	Alive or dead due to cancer	145
Blank(s)	Married (including common law)	55	1948	2004	March	Male	White	C22.0-Liver	8170/3: Hepatocellular carcinoma, NOS	Moderately differentiated; Grade II	8.6.3 Carcinoma of liver and intrahepatic bile ducts	VII(b) Hepatic carcinomas	Positive histology	IIIA	T3	N0	M0	Blank(s)	Blank(s)	Blank(s)	Blank(s)	Blank(s)	Localized	37	None	None; diagnosed at autopsy	10	999	Blank(s)	Blank(s)	Blank(s)	Blank(s)	Blank(s)	Blank(s)	Blank(s)	Blank(s)	Blank(s)	Blank(s)	Blank(s)	Blank(s)	Blank(s)	988	0	98	Blank(s)	Other Infectious and Parasitic Diseases including HIV	Alive or dead of other cause	Dead (attributable to causes other than this cancer dx)	22
Blank(s)	Married (including common law)	66	1938	2004	July	Female	Other (American Indian/AK Native, Asian/Pacific Islander)	C22.0-Liver	8170/3: Hepatocellular carcinoma, NOS	Well differentiated; Grade I	8.6.3 Carcinoma of liver and intrahepatic bile ducts	VII(b) Hepatic carcinomas	Positive histology	II	T2	N0	M0	Blank(s)	Blank(s)	Blank(s)	Blank(s)	Blank(s)	Localized	61	None	None; diagnosed at autopsy	10	0	Blank(s)	Blank(s)	Blank(s)	Blank(s)	Blank(s)	Blank(s)	Blank(s)	Blank(s)	Blank(s)	Blank(s)	Blank(s)	Blank(s)	Blank(s)	988	0	98	Blank(s)	Alive	Alive or dead of other cause	Alive or dead due to cancer	149
Blank(s)	Single (never married)	59	1945	2004	August	Male	White	C22.0-Liver	8170/3: Hepatocellular carcinoma, NOS	Poorly differentiated; Grade III	8.6.3 Carcinoma of liver and intrahepatic bile ducts	VII(b) Hepatic carcinomas	Positive histology	II	T2	N0	M0	Blank(s)	Blank(s)	Blank(s)	Blank(s)	Blank(s)	Localized	16	None	None; diagnosed at autopsy	10	999	Blank(s)	Blank(s)	Blank(s)	Blank(s)	Blank(s)	Blank(s)	Blank(s)	Blank(s)	Blank(s)	Blank(s)	Blank(s)	Blank(s)	Blank(s)	988	0	98	Blank(s)	Liver	Dead (attributable to this cancer dx)	Alive or dead due to cancer	7
Blank(s)	Married (including common law)	70	1933	2004	August	Male	White	C22.0-Liver	8170/3: Hepatocellular carcinoma, NOS	Unknown	8.6.3 Carcinoma of liver and intrahepatic bile ducts	VII(b) Hepatic carcinomas	Positive histology	II	T2	N0	M0	Blank(s)	Blank(s)	Blank(s)	Blank(s)	Blank(s)	Localized	16	None	None; diagnosed at autopsy	10	999	Blank(s)	Blank(s)	Blank(s)	Blank(s)	Blank(s)	Blank(s)	Blank(s)	Blank(s)	Blank(s)	Blank(s)	Blank(s)	Blank(s)	Blank(s)	988	0	98	Blank(s)	Symptoms, Signs and Ill-Defined Conditions	Alive or dead of other cause	Dead (attributable to causes other than this cancer dx)	13
Blank(s)	Married (including common law)	62	1942	2004	November	Male	Black	C22.0-Liver	8170/3: Hepatocellular carcinoma, NOS	Unknown	8.6.3 Carcinoma of liver and intrahepatic bile ducts	VII(b) Hepatic carcinomas	Positive histology	UNK Stage	T2	NX	M0	Blank(s)	Blank(s)	Blank(s)	Blank(s)	Blank(s)	Regional	16	None	None; diagnosed at autopsy	10	999	Blank(s)	Blank(s)	Blank(s)	Blank(s)	Blank(s)	Blank(s)	Blank(s)	Blank(s)	Blank(s)	Blank(s)	Blank(s)	Blank(s)	Blank(s)	988	0	98	Blank(s)	Liver	Dead (attributable to this cancer dx)	Alive or dead due to cancer	8
Blank(s)	Married (including common law)	73	1931	2004	December	Male	Other (American Indian/AK Native, Asian/Pacific Islander)	C22.0-Liver	8170/3: Hepatocellular carcinoma, NOS	Moderately differentiated; Grade II	8.6.3 Carcinoma of liver and intrahepatic bile ducts	VII(b) Hepatic carcinomas	Positive histology	UNK Stage	T1	NX	M0	Blank(s)	Blank(s)	Blank(s)	Blank(s)	Blank(s)	Localized	20	None	None; diagnosed at autopsy	998	999	Blank(s)	Blank(s)	Blank(s)	Blank(s)	Blank(s)	Blank(s)	Blank(s)	Blank(s)	Blank(s)	Blank(s)	Blank(s)	Blank(s)	Blank(s)	988	0	98	Blank(s)	Alive	Alive or dead of other cause	Alive or dead due to cancer	144
Blank(s)	Single (never married)	75	1928	2004	May	Male	Other (American Indian/AK Native, Asian/Pacific Islander)	C22.0-Liver	8170/3: Hepatocellular carcinoma, NOS	Moderately differentiated; Grade II	8.6.3 Carcinoma of liver and intrahepatic bile ducts	VII(b) Hepatic carcinomas	Positive exfoliative cytology, no positive histology	II	T2	N0	M0	Blank(s)	Blank(s)	Blank(s)	Blank(s)	Blank(s)	Regional	0	None	None; diagnosed at autopsy	10	999	Blank(s)	Blank(s)	Blank(s)	Blank(s)	Blank(s)	Blank(s)	Blank(s)	Blank(s)	Blank(s)	Blank(s)	Blank(s)	Blank(s)	Blank(s)	988	0	98	Blank(s)	Liver	Dead (attributable to this cancer dx)	Alive or dead due to cancer	1
Insured	Married (including common law)	75	1937	2013	April	Male	Other (American Indian/AK Native, Asian/Pacific Islander)	C22.0-Liver	8170/3: Hepatocellular carcinoma, NOS	Poorly differentiated; Grade III	8.6.3 Carcinoma of liver and intrahepatic bile ducts	VII(b) Hepatic carcinomas	Positive histology	I	T1	N0	M0	Blank(s)	Blank(s)	Blank(s)	Blank(s)	Blank(s)	Localized	36	None	None; diagnosed at autopsy	10	1	Blank(s)	Blank(s)	Blank(s)	Blank(s)	Blank(s)	Blank(s)	Blank(s)	Blank(s)	Blank(s)	Blank(s)	Blank(s)	Blank(s)	Blank(s)	988	0	98	Blank(s)	Liver	N/A not first tumor	N/A not first tumor	28
Blank(s)	Married (including common law)	55	1949	2004	September	Male	White	C22.0-Liver	8170/3: Hepatocellular carcinoma, NOS	Unknown	8.6.3 Carcinoma of liver and intrahepatic bile ducts	VII(b) Hepatic carcinomas	Positive histology	UNK Stage	TX	NX	MX	Blank(s)	Blank(s)	Blank(s)	Blank(s)	Blank(s)	Unknown/unstaged	0	None	None; diagnosed at autopsy	998	999	Blank(s)	Blank(s)	Blank(s)	Blank(s)	Blank(s)	Blank(s)	Blank(s)	Blank(s)	Blank(s)	Blank(s)	Blank(s)	Blank(s)	Blank(s)	988	0	98	Blank(s)	Liver	Dead (attributable to this cancer dx)	Alive or dead due to cancer	1
Insured	Married (including common law)	75	1931	2007	January	Male	White	C22.0-Liver	8170/3: Hepatocellular carcinoma, NOS	Poorly differentiated; Grade III	8.6.3 Carcinoma of liver and intrahepatic bile ducts	VII(b) Hepatic carcinomas	Positive histology	IIINOS	T3	NX	M0	Blank(s)	Blank(s)	Blank(s)	Blank(s)	Blank(s)	Regional	0	None	None; diagnosed at autopsy	10	999	Blank(s)	Blank(s)	Blank(s)	Blank(s)	Blank(s)	Blank(s)	Blank(s)	Blank(s)	Blank(s)	Blank(s)	Blank(s)	Blank(s)	Blank(s)	988	0	98	Blank(s)	Liver	N/A not first tumor	N/A not first tumor	3
Blank(s)	Married (including common law)	59	1944	2004	February	Male	White	C22.0-Liver	8170/3: Hepatocellular carcinoma, NOS	Moderately differentiated; Grade II	8.6.3 Carcinoma of liver and intrahepatic bile ducts	VII(b) Hepatic carcinomas	Positive histology	II	T2	N0	M0	Blank(s)	Blank(s)	Blank(s)	Blank(s)	Blank(s)	Regional	61	None	None; diagnosed at autopsy	10	999	Blank(s)	Blank(s)	Blank(s)	Blank(s)	Blank(s)	Blank(s)	Blank(s)	Blank(s)	Blank(s)	Blank(s)	Blank(s)	Blank(s)	Blank(s)	988	1	0	Blank(s)	Alive	Alive or dead of other cause	Alive or dead due to cancer	154
Blank(s)	Divorced	57	1947	2004	September	Male	Black	C22.0-Liver	8170/3: Hepatocellular carcinoma, NOS	Unknown	8.6.3 Carcinoma of liver and intrahepatic bile ducts	VII(b) Hepatic carcinomas	Radiography without microscopic confirm	IV	T2	NX	M1	Blank(s)	Blank(s)	Blank(s)	Blank(s)	Blank(s)	Distant	0	None	None; diagnosed at autopsy	10	999	Blank(s)	Blank(s)	Blank(s)	Blank(s)	Blank(s)	Blank(s)	Blank(s)	Blank(s)	Blank(s)	Blank(s)	Blank(s)	Blank(s)	Blank(s)	988	0	98	Blank(s)	Cerebrovascular Diseases	Alive or dead of other cause	Dead (attributable to causes other than this cancer dx)	1
Blank(s)	Married (including common law)	64	1940	2004	September	Male	Other (American Indian/AK Native, Asian/Pacific Islander)	C22.0-Liver	8170/3: Hepatocellular carcinoma, NOS	Unknown	8.6.3 Carcinoma of liver and intrahepatic bile ducts	VII(b) Hepatic carcinomas	Positive histology	I	T1	N0	M0	Blank(s)	Blank(s)	Blank(s)	Blank(s)	Blank(s)	Localized	0	None	None; diagnosed at autopsy	10	0	Blank(s)	Blank(s)	Blank(s)	Blank(s)	Blank(s)	Blank(s)	Blank(s)	Blank(s)	Blank(s)	Blank(s)	Blank(s)	Blank(s)	Blank(s)	988	0	98	Blank(s)	Liver	Dead (attributable to this cancer dx)	Alive or dead due to cancer	5
Blank(s)	Married (including common law)	62	1941	2004	February	Male	Other (American Indian/AK Native, Asian/Pacific Islander)	C22.0-Liver	8170/3: Hepatocellular carcinoma, NOS	Unknown	8.6.3 Carcinoma of liver and intrahepatic bile ducts	VII(b) Hepatic carcinomas	Positive histology	IIIC	T1	N1	M0	Blank(s)	Blank(s)	Blank(s)	Blank(s)	Blank(s)	Regional	0	None	None; diagnosed at autopsy	999	999	Blank(s)	Blank(s)	Blank(s)	Blank(s)	Blank(s)	Blank(s)	Blank(s)	Blank(s)	Blank(s)	Blank(s)	Blank(s)	Blank(s)	Blank(s)	988	0	98	Blank(s)	Liver	Dead (attributable to this cancer dx)	Alive or dead due to cancer	7
Blank(s)	Widowed	88	1916	2004	November	Female	Other (American Indian/AK Native, Asian/Pacific Islander)	C22.0-Liver	8170/3: Hepatocellular carcinoma, NOS	Unknown	8.6.3 Carcinoma of liver and intrahepatic bile ducts	VII(b) Hepatic carcinomas	Radiography without microscopic confirm	I	T1	N0	M0	Blank(s)	Blank(s)	Blank(s)	Blank(s)	Blank(s)	Localized	0	None	None; diagnosed at autopsy	10	999	Blank(s)	Blank(s)	Blank(s)	Blank(s)	Blank(s)	Blank(s)	Blank(s)	Blank(s)	Blank(s)	Blank(s)	Blank(s)	Blank(s)	Blank(s)	988	0	98	Blank(s)	Liver	Dead (attributable to this cancer dx)	Alive or dead due to cancer	0
Blank(s)	Married (including common law)	68	1936	2004	October	Male	White	C22.0-Liver	8170/3: Hepatocellular carcinoma, NOS	Unknown	8.6.3 Carcinoma of liver and intrahepatic bile ducts	VII(b) Hepatic carcinomas	Positive histology	UNK Stage	TX	N0	MX	Blank(s)	Blank(s)	Blank(s)	Blank(s)	Blank(s)	Unknown/unstaged	0	None	None; diagnosed at autopsy	999	999	Blank(s)	Blank(s)	Blank(s)	Blank(s)	Blank(s)	Blank(s)	Blank(s)	Blank(s)	Blank(s)	Blank(s)	Blank(s)	Blank(s)	Blank(s)	988	0	98	Blank(s)	Liver	Dead (attributable to this cancer dx)	Alive or dead due to cancer	2
Blank(s)	Divorced	63	1940	2004	November	Female	Other (American Indian/AK Native, Asian/Pacific Islander)	C22.0-Liver	8170/3: Hepatocellular carcinoma, NOS	Moderately differentiated; Grade II	8.6.3 Carcinoma of liver and intrahepatic bile ducts	VII(b) Hepatic carcinomas	Positive histology	IIIA	T3	N0	M0	Blank(s)	Blank(s)	Blank(s)	Blank(s)	Blank(s)	Regional	36	None	None; diagnosed at autopsy	20	999	Blank(s)	Blank(s)	Blank(s)	Blank(s)	Blank(s)	Blank(s)	Blank(s)	Blank(s)	Blank(s)	Blank(s)	Blank(s)	Blank(s)	Blank(s)	988	0	98	Blank(s)	State DC not available or state DC available but no COD	Dead (missing/unknown COD)	Dead (missing/unknown COD)	71
Insured	Widowed	74	1939	2014	April	Male	White	C22.0-Liver	8170/3: Hepatocellular carcinoma, NOS	Unknown	8.6.3 Carcinoma of liver and intrahepatic bile ducts	VII(b) Hepatic carcinomas	Radiography without microscopic confirm	I	T1	N0	M0	Blank(s)	Blank(s)	Blank(s)	Blank(s)	Blank(s)	Localized	16	None	None; diagnosed at autopsy	20	0	Blank(s)	Blank(s)	Blank(s)	Blank(s)	Blank(s)	Blank(s)	Blank(s)	Blank(s)	Blank(s)	Blank(s)	Blank(s)	Blank(s)	Blank(s)	988	0	98	Blank(s)	Miscellaneous Malignant Cancer	N/A not first tumor	N/A not first tumor	22
Insured	Married (including common law)	61	1952	2014	April	Male	Black	C22.1-Intrahepatic bile duct	8160/3: Cholangiocarcinoma	Unknown	8.6.3 Carcinoma of liver and intrahepatic bile ducts	VII(b) Hepatic carcinomas	Positive histology	IV	T3	N1	M1	Blank(s)	Blank(s)	Blank(s)	Blank(s)	Blank(s)	Distant	0	None	None; diagnosed at autopsy	20	999	Blank(s)	Blank(s)	Blank(s)	Blank(s)	Blank(s)	Blank(s)	Blank(s)	Blank(s)	Blank(s)	Blank(s)	Blank(s)	Blank(s)	Blank(s)	988	0	98	Blank(s)	Intrahepatic Bile Duct	N/A not first tumor	N/A not first tumor	1
Blank(s)	Married (including common law)	51	1952	2004	March	Male	White	C22.0-Liver	8170/3: Hepatocellular carcinoma, NOS	Well differentiated; Grade I	8.6.3 Carcinoma of liver and intrahepatic bile ducts	VII(b) Hepatic carcinomas	Positive histology	I	T1	N0	M0	Blank(s)	Blank(s)	Blank(s)	Blank(s)	Blank(s)	Localized	21	None	None; diagnosed at autopsy	10	999	Blank(s)	Blank(s)	Blank(s)	Blank(s)	Blank(s)	Blank(s)	Blank(s)	Blank(s)	Blank(s)	Blank(s)	Blank(s)	Blank(s)	Blank(s)	988	0	98	Blank(s)	Liver	Dead (attributable to this cancer dx)	Alive or dead due to cancer	13
Blank(s)	Single (never married)	63	1940	2004	February	Male	Other (American Indian/AK Native, Asian/Pacific Islander)	C22.0-Liver	8170/3: Hepatocellular carcinoma, NOS	Unknown	8.6.3 Carcinoma of liver and intrahepatic bile ducts	VII(b) Hepatic carcinomas	Radiography without microscopic confirm	UNK Stage	T4	NX	MX	Blank(s)	Blank(s)	Blank(s)	Blank(s)	Blank(s)	Distant	0	None	None; diagnosed at autopsy	998	999	Blank(s)	Blank(s)	Blank(s)	Blank(s)	Blank(s)	Blank(s)	Blank(s)	Blank(s)	Blank(s)	Blank(s)	Blank(s)	Blank(s)	Blank(s)	988	0	98	Blank(s)	Liver	Dead (attributable to this cancer dx)	Alive or dead due to cancer	2
Blank(s)	Widowed	91	1913	2004	September	Female	White	C22.0-Liver	8170/3: Hepatocellular carcinoma, NOS	Unknown	8.6.3 Carcinoma of liver and intrahepatic bile ducts	VII(b) Hepatic carcinomas	Radiography without microscopic confirm	UNK Stage	T3	NX	MX	Blank(s)	Blank(s)	Blank(s)	Blank(s)	Blank(s)	Regional	0	None	None; diagnosed at autopsy	998	999	Blank(s)	Blank(s)	Blank(s)	Blank(s)	Blank(s)	Blank(s)	Blank(s)	Blank(s)	Blank(s)	Blank(s)	Blank(s)	Blank(s)	Blank(s)	988	0	98	Blank(s)	Liver	Dead (attributable to this cancer dx)	Alive or dead due to cancer	0
Blank(s)	Married (including common law)	66	1938	2004	December	Male	White	C22.0-Liver	8170/3: Hepatocellular carcinoma, NOS	Moderately differentiated; Grade II	8.6.3 Carcinoma of liver and intrahepatic bile ducts	VII(b) Hepatic carcinomas	Positive histology	I	T1	N0	M0	Blank(s)	Blank(s)	Blank(s)	Blank(s)	Blank(s)	Localized	36	None	None; diagnosed at autopsy	20	999	Blank(s)	Blank(s)	Blank(s)	Blank(s)	Blank(s)	Blank(s)	Blank(s)	Blank(s)	Blank(s)	Blank(s)	Blank(s)	Blank(s)	Blank(s)	988	0	98	Blank(s)	Other Cause of Death	Alive or dead of other cause	Dead (attributable to causes other than this cancer dx)	125
Blank(s)	Widowed	56	1948	2004	September	Male	White	C22.0-Liver	8170/3: Hepatocellular carcinoma, NOS	Unknown	8.6.3 Carcinoma of liver and intrahepatic bile ducts	VII(b) Hepatic carcinomas	Radiography without microscopic confirm	I	T1	N0	M0	Blank(s)	Blank(s)	Blank(s)	Blank(s)	Blank(s)	Localized	61	1 to 3 regional lymph nodes removed	None; diagnosed at autopsy	10	1	Blank(s)	Blank(s)	Blank(s)	Blank(s)	Blank(s)	Blank(s)	Blank(s)	Blank(s)	Blank(s)	Blank(s)	Blank(s)	Blank(s)	Blank(s)	988	1	0	Blank(s)	Alive	Alive or dead of other cause	Alive or dead due to cancer	147
Blank(s)	Married (including common law)	45	1958	2004	December	Male	Other (American Indian/AK Native, Asian/Pacific Islander)	C22.0-Liver	8170/3: Hepatocellular carcinoma, NOS	Unknown	8.6.3 Carcinoma of liver and intrahepatic bile ducts	VII(b) Hepatic carcinomas	Positive histology	UNK Stage	T1	NX	M0	Blank(s)	Blank(s)	Blank(s)	Blank(s)	Blank(s)	Regional	0	None	None; diagnosed at autopsy	999	999	Blank(s)	Blank(s)	Blank(s)	Blank(s)	Blank(s)	Blank(s)	Blank(s)	Blank(s)	Blank(s)	Blank(s)	Blank(s)	Blank(s)	Blank(s)	988	0	98	Blank(s)	Liver	Dead (attributable to this cancer dx)	Alive or dead due to cancer	14
[truncated: 79,351 more rows]
[truncated: 6 more columns]
